# Supplementary material for: Characterization of endoplasmic reticulum-associated degradation in the human fungal pathogen Candida albicans
Source: PeerJ. 2023 Aug 25;11:e15897. doi: 10.7717/peerj.15897 (PMC10461541; doi:10.7717/peerj.15897)
Supplement: Supplemental Information 3 [file peerj-11-15897-s003.xlsx]

## Sheet: Proteins
Protein FDR Confidence: Combined	Master	Accession	Description	# Peptides	# PSMs	Abundance Ratio P-Value: (Doa) / (WT)	Abundance Ratio P-Value: (Hrd) / (WT)	Abundance Ratio P-Value: (Ub) / (WT)	Abundance Ratio: (Doa) / (WT)	Abundance Ratio: (Hrd) / (WT)	Abundance Ratio: (Ub) / (WT)	Abundance Ratio (log2): (Doa) / (WT)	Abundance Ratio (log2): (Hrd) / (WT)	Abundance Ratio (log2): (Ub) / (WT)	Abundances (Grouped): Doa	Abundances (Grouped): Hrd	Abundances (Grouped): Ub	Abundances (Grouped): WT	Abundances (Grouped) CV [%]: Doa	Abundances (Grouped) CV [%]: Hrd	Abundances (Grouped) CV [%]: Ub	Abundances (Grouped) CV [%]: WT	# Unique Peptides	Found in Sample: [S4] F1: 128N, Sample, Doa	Found in Sample: [S5] F1: 128C, Sample, Doa	Found in Sample: [S6] F1: 129N, Sample, Doa	Found in Sample: [S7] F1: 129C, Sample, Hrd	Found in Sample: [S8] F1: 132N, Sample, Hrd	Found in Sample: [S9] F1: 132C, Sample, Hrd	Found in Sample: [S10] F1: 133N, Sample, Ub	Found in Sample: [S11] F1: 133C, Sample, Ub	Found in Sample: [S12] F1: 134N, Sample, Ub	Found in Sample: [S1] F1: 126, Sample, WT	Found in Sample: [S2] F1: 127N, Sample, WT	Found in Sample: [S3] F1: 127C, Sample, WT	Abundances (Normalized): F1: 128N, Sample, Doa	Abundances (Normalized): F1: 128C, Sample, Doa	Abundances (Normalized): F1: 129N, Sample, Doa	Abundances (Normalized): F1: 129C, Sample, Hrd	Abundances (Normalized): F1: 132N, Sample, Hrd	Abundances (Normalized): F1: 132C, Sample, Hrd	Abundances (Normalized): F1: 133N, Sample, Ub	Abundances (Normalized): F1: 133C, Sample, Ub	Abundances (Normalized): F1: 134N, Sample, Ub	Abundances (Normalized): F1: 126, Sample, WT	Abundances (Normalized): F1: 127N, Sample, WT	Abundances (Normalized): F1: 127C, Sample, WT	# Protein Groups	Abundance: F1: 128N, Sample, Doa
High	Master Protein	A0A1D8PTY7	E2 ubiquitin-conjugating protein OS=Candida albicans (strain SC5314 / ATCC MYA-2876) OX=237561 GN=CAALFM_CR09340WA PE=3 SV=1	4	7	0.997872	0.958741	2.25672e-08	1.009	0.981	0.578	0.01	-0.03	-0.79	1534.1	1491.5	878.5	1521	2.74	3.58	1.21	2.7	4	High	High	High	High	High	High	High	High	High	High	High	High	1587.2	1503.7	1534.1	1491.5	1582.2	1484.9	880.2	878.5	861.1	1582.4	1503.6	1521	1	1110.2
High	Master Protein	P30575	Enolase 1 OS=Candida albicans (strain SC5314 / ATCC MYA-2876) OX=237561 GN=ENO1 PE=1 SV=1	36	1038	0.000121187	0.000159895	7.0148e-05	0.688	0.684	0.664	-0.54	-0.55	-0.59	116640	115843	112606	169483	2.17	5.68	8.35	1.9	35	High	High	High	High	High	High	High	High	High	High	High	High	115917	116640	120665	115843	115275	127308	125146	106329	112606	172641	166204	169483	1	81079.1
High	Master Protein	A0A1D8PJH2	Mitochondrial pyruvate carrier OS=Candida albicans (strain SC5314 / ATCC MYA-2876) OX=237561 GN=orf19.252 PE=3 SV=1	2	2	0.0548419	0.0160982	7.27838e-05	0.94	1.088	1.181	-0.09	0.12	0.24	753.4	872.5	947.2	801.8	3.21	2.3	2.44	0.46	2	High	High	High	High	High	High	High	High	High	High	High	High	783.7	753.4	735.6	846	872.5	885.1	947.2	941.4	984.4	808.1	801.7	801.8	1	548.2
Low	Master Protein	A0A1D8PTF6	Uncharacterized protein OS=Candida albicans (strain SC5314 / ATCC MYA-2876) OX=237561 GN=CAALFM_CR07220CA PE=4 SV=1	1	2	0.000141325	0.000110558	0.000129584	0.605	0.635	0.6	-0.72	-0.66	-0.74	328.1	344	325.1	541.9	6.99	7.89	6.51	4.42	1	High	High	High	High	High	High	High	High	High	High	High	High	319.7	364.1	328.1	350.6	344	302.2	360.5	325.1	320.6	544.3	502.6	541.9	1	223.7
High	Master Protein	A0A1D8PGU5	Uncharacterized protein OS=Candida albicans (strain SC5314 / ATCC MYA-2876) OX=237561 GN=orf19.875 PE=4 SV=1	7	14	0.0765212	0.0149997	0.00015007	1.04	1.056	1.135	0.06	0.08	0.18	1408	1429.9	1536.2	1353.6	1.02	3	2.34	1.52	7	High	High	High	High	High	High	High	High	High	High	High	High	1432.9	1407.9	1408	1429.9	1494.5	1412.1	1596.6	1531.4	1536.2	1324.8	1364.5	1353.6	1	1002.3
High	Master Protein	A0A1D8PR81	Uncharacterized protein OS=Candida albicans (strain SC5314 / ATCC MYA-2876) OX=237561 GN=SAP190 PE=3 SV=1	7	9	0.80418	0.00425566	0.000152337	1.004	0.899	0.84	0.01	-0.15	-0.25	811.1	726	678.4	807.6	3.84	0.37	3.57	0.26	7	High	High	High	High	High	High	High	High	High	High	High	High	811.1	860.7	802	726	727.8	722.6	700.5	652.3	678.4	810.9	806.9	807.6	1	567.3
High	Master Protein	Q59L46	Uncharacterized protein OS=Candida albicans (strain SC5314 / ATCC MYA-2876) OX=237561 GN=orf19.1917 PE=4 SV=1	5	15	0.0842916	0.0155044	0.000209692	1.036	0.968	0.922	0.05	-0.05	-0.12	2065.2	1930.1	1838.1	1993.6	1.71	1.46	0.77	1.52	5	High	High	High	High	High	High	High	High	High	High	High	High	2112.6	2043	2065.2	1883.2	1930.1	1933	1840.6	1838.1	1814.9	1993.6	1985.5	2041.9	1	1477.6
High	Master Protein	A0A1D8PLY4	Pyruvate carboxylase OS=Candida albicans (strain SC5314 / ATCC MYA-2876) OX=237561 GN=PYC2 PE=4 SV=1	69	283	0.0232326	0.0073074	0.00022948	1.038	1.053	1.078	0.05	0.07	0.11	56270.1	57101.2	58466.5	54214.3	0.51	1.78	0.49	1.04	68	High	High	High	High	High	High	High	High	High	High	High	High	56642.3	56083.1	56270.1	57101.2	57586.9	55648.9	58690.3	58466.5	58117.6	54100.5	54214.3	55132.8	1	39618.8
High	Master Protein	A0A1D8PPM9	Oye23p OS=Candida albicans (strain SC5314 / ATCC MYA-2876) OX=237561 GN=OYE23 PE=4 SV=1	17	54	0.894727	0.931667	0.000419587	0.991	0.988	0.878	-0.01	-0.02	-0.19	2742.3	2733.9	2429.4	2766.7	3.31	1.34	1.62	1.85	11	High	High	High	High	High	High	High	High	High	High	High	High	2742.3	2811.3	2632.1	2733.9	2695.7	2769.2	2390.9	2469.7	2429.4	2766.7	2708.7	2810.5	1	1918.2
High	Master Protein	A0A1D8PQT7	Uncharacterized protein OS=Candida albicans (strain SC5314 / ATCC MYA-2876) OX=237561 GN=orf19.6916 PE=3 SV=1	9	19	0.985738	0.00546123	0.000483531	1.015	1.067	1.109	0.02	0.09	0.15	2367.8	2490.2	2587.3	2333.2	2.07	0.72	1.38	1.64	9	High	High	High	High	High	High	High	High	High	High	High	High	2409	2367.8	2311.4	2520.9	2490.2	2489.1	2529.2	2587.3	2593.1	2333.2	2396.9	2327.7	1	1685
High	Master Protein	Q5AP79	Mir1p OS=Candida albicans (strain SC5314 / ATCC MYA-2876) OX=237561 GN=MIR1 PE=3 SV=1	23	178	0.0896508	0.366668	0.000849764	0.96	1.045	1.121	-0.06	0.06	0.17	28064.4	30571.1	32794.9	29247.4	2.71	1.12	2.42	1.9	23	High	High	High	High	High	High	High	High	High	High	High	High	28946.6	27429.3	28064.4	30044.8	30571.1	30680.8	32794.9	32412.9	33949.8	29172.4	30182.2	29247.4	1	20246.9
High	Master Protein	Q59Z50	Spermidine synthase OS=Candida albicans (strain SC5314 / ATCC MYA-2876) OX=237561 GN=SPE3 PE=3 SV=1	22	99	0.00888914	0.401333	0.000881802	0.943	1.021	1.074	-0.08	0.03	0.1	22953.2	24841.2	26140	24341.1	1.86	1.45	1.3	1.62	22	High	High	High	High	High	High	High	High	High	High	High	High	22953.2	22306.5	23102.5	24246.6	24889.1	24841.2	26140	25947.8	26608.5	24386.9	24341.1	23686.7	1	16054.7
High	Master Protein	Q5AH14	Tom40p OS=Candida albicans (strain SC5314 / ATCC MYA-2876) OX=237561 GN=TOM40 PE=3 SV=1	17	82	0.0973828	0.999927	0.000935122	0.974	1.004	1.069	-0.04	0.01	0.1	12497	12877.9	13717.3	12826.5	0.72	0.86	2.08	1.26	17	High	High	High	High	High	High	High	High	High	High	High	High	12588.7	12407.6	12497	12877.9	12971.3	12751	14127.4	13575.6	13717.3	12743.2	13055.6	12826.5	1	8805.3
High	Master Protein	A0A1D8PMH8	Glutamate dehydrogenase OS=Candida albicans (strain SC5314 / ATCC MYA-2876) OX=237561 GN=GDH3 PE=1 SV=1	31	181	0.0441223	0.0273897	0.00097708	0.957	1.05	1.069	-0.06	0.07	0.1	34913.6	38291.7	38982.6	36464.7	0.85	2.39	0.54	0.67	31	High	High	High	High	High	High	High	High	High	High	High	High	34913.6	35410.3	34881	36808.7	38448.5	38291.7	38796	38982.6	39216.8	36536.3	36080.3	36464.7	1	24420.5
High	Master Protein	Q5AKW7	rRNA adenine N(6)-methyltransferase OS=Candida albicans (strain SC5314 / ATCC MYA-2876) OX=237561 GN=DIM1 PE=3 SV=1	12	29	0.994569	0.974549	0.00153748	1	1.003	1.064	0	0	0.09	4436.9	4453.5	4724.7	4438.9	1.23	0.8	0.9	1.42	12	High	High	High	High	High	High	High	High	High	High	High	High	4403.5	4510.7	4436.9	4404	4472.5	4453.5	4739.8	4659.8	4724.7	4410.5	4438.9	4531.4	1	3080
High	Master Protein	A0A1D8PG96	Endoplasmic reticulum chaperone BiP OS=Candida albicans (strain SC5314 / ATCC MYA-2876) OX=237561 GN=KAR2 PE=3 SV=1	54	363	0.828034	0.000220729	0.00174353	1.017	1.117	1.08	0.02	0.16	0.11	50310.1	55295	53466.9	49489.2	1.13	2.01	2.43	1.03	51	High	High	High	High	High	High	High	High	High	High	High	High	50312.6	49329.4	50310.1	56403	55295	54178.9	55090.6	53466.9	52507	49821.6	49489.2	48819.2	1	35191.5
High	Master Protein	Q5ABP8	Protein ROT1 OS=Candida albicans (strain SC5314 / ATCC MYA-2876) OX=237561 GN=ROT1 PE=3 SV=1	5	14	0.320317	0.000753106	0.00178717	1.024	1.133	1.097	0.03	0.18	0.13	2034.2	2250	2179.1	1986.4	1.1	2.3	4.33	2.06	5	High	High	High	High	High	High	High	High	High	High	High	High	2071.5	2034.2	2030.9	2234.8	2332	2250	2175.8	2344.8	2179.1	1917.5	1986.4	1988.9	1	1448.9
High	Master Protein	A0A1D8PIV7	Proteasome regulatory particle base subunit OS=Candida albicans (strain SC5314 / ATCC MYA-2876) OX=237561 GN=RPT2 PE=3 SV=1	21	90	0.999433	0.0263638	0.00185836	1.004	0.971	0.949	0.01	-0.04	-0.08	13325.4	12890.1	12589.7	13271	0.59	1.12	1.58	1.36	21	High	High	High	High	High	High	High	High	High	High	High	High	13216.1	13367.1	13325.4	12955.6	12890.1	12680	12369.5	12589.7	12765.1	13165.9	13518.7	13271	1	9244.1
High	Master Protein	Q5AB97	Hmx1p OS=Candida albicans (strain SC5314 / ATCC MYA-2876) OX=237561 GN=HMX1 PE=4 SV=1	11	36	0.0237792	0.263824	0.00247155	1.035	1.02	1.059	0.05	0.03	0.08	7044.2	6947.8	7213.9	6809	1.44	0.62	2.06	0.64	11	High	High	High	High	High	High	High	High	High	High	High	High	7044.2	7207.5	7019.8	6947.8	6920.6	7004.7	7386.9	7213.9	7090.2	6851.1	6764.2	6809	1	4927.1
High	Master Protein	A0A1D8PCE7	Exosome non-catalytic core subunit OS=Candida albicans (strain SC5314 / ATCC MYA-2876) OX=237561 GN=orf19.3304 PE=4 SV=1	11	27	0.531746	0.0611285	0.00250593	0.976	1.061	1.114	-0.04	0.08	0.16	3607.7	3921.8	4118	3697.7	1.95	2.49	1.24	3.01	11	High	High	High	High	High	High	High	High	High	High	High	High	3725	3607.7	3597.5	3878.8	3921.8	4066.7	4118	4100.1	4196.6	3653.4	3866.9	3697.7	1	2605.5
High	Master Protein	Q5A6L5	Cysteine proteinase 1, mitochondrial OS=Candida albicans (strain SC5314 / ATCC MYA-2876) OX=237561 GN=LAP3 PE=3 SV=1	20	70	0.999981	0.0979611	0.00251959	1.005	1.062	1.081	0.01	0.09	0.11	11957.6	12636.4	12856.8	11895.7	0.61	2.8	1.49	1.28	20	High	High	High	High	High	High	High	High	High	High	High	High	11957.6	12065.1	11924.2	12672.6	12636.4	12050.8	13176.8	12830.8	12856.8	11895.7	11881.2	12152.8	1	8363.8
High	Master Protein	A0A1D8PEA2	Dolichol-phosphate mannosyltransferase subunit 1 OS=Candida albicans (strain SC5314 / ATCC MYA-2876) OX=237561 GN=DPM1 PE=3 SV=1	16	56	0.995874	0.00256071	0.00311342	1.01	1.098	1.098	0.02	0.13	0.13	9129.8	9920.5	9919.8	9035.3	2.74	2.36	1.34	1.43	16	High	High	High	High	High	High	High	High	High	High	High	High	9378.8	8878.6	9129.8	9767.9	9920.5	10230.1	10087.7	9919.8	9823.4	9003.4	9035.3	9242.2	1	6560
Low	Master Protein	A0A1D8PFB2	Uncharacterized protein OS=Candida albicans (strain SC5314 / ATCC MYA-2876) OX=237561 GN=orf19.5258 PE=4 SV=1	1	1	0.392008	0.0127241	0.00342488	1.061	0.779	0.726	0.08	-0.36	-0.46	292.8	215	200.5	276.1	12.84	1.3	6.84	4.23	1	High	High	High	High	High	High	High	High	High	High	High	High	278.1	352.8	292.8	215	210.9	216.2	187.6	200.5	215.1	276.1	265.2	288.6	1	194.5
High	Master Protein	A0A1D8PNH7	Uncharacterized protein OS=Candida albicans (strain SC5314 / ATCC MYA-2876) OX=237561 GN=orf19.4287 PE=3 SV=1	2	2	0.962322	0.129685	0.00346688	1.032	0.862	0.793	0.05	-0.21	-0.34	606.6	506.5	465.7	587.6	2.84	6.29	8.6	1.13	2	High	High	High	High	High	High	High	High	High	High	High	High	611.4	606.6	579.8	561.8	506.5	503.2	465.7	502.9	423.2	587.6	592.3	579.3	1	427.7
High	Master Protein	P83773	Acetyl-CoA hydrolase OS=Candida albicans (strain SC5314 / ATCC MYA-2876) OX=237561 GN=ACH1 PE=1 SV=3	31	130	0.999849	0.413692	0.00348679	0.996	1.024	1.071	-0.01	0.03	0.1	26966.9	27705.9	28988	27065.2	0.08	2.95	1.46	0.52	31	High	High	High	High	High	High	High	High	High	High	High	High	26966.9	26943	26984.5	27705.9	28368.2	26749.1	28568.1	29416.4	28988	27078.9	26831.3	27065.2	1	18862.1
High	Master Protein	Q59X40	Mediator of RNA polymerase II transcription subunit 18 OS=Candida albicans (strain SC5314 / ATCC MYA-2876) OX=237561 GN=SRB5 PE=3 SV=1	2	2	0.0365276	0.00548085	0.00373602	0.864	0.774	0.795	-0.21	-0.37	-0.33	235.8	211.2	216.8	272.8	3.98	6.03	9.03	0.65	2	High	High	High	High	High	High	High	High	High	High	High	High	237.3	220.7	235.8	211.2	230.9	206.3	230.5	216.8	192.5	273.4	272.8	270.1	1	166
High	Master Protein	Q5AC35	Uncharacterized protein OS=Candida albicans (strain SC5314 / ATCC MYA-2876) OX=237561 GN=orf19.5515 PE=3 SV=1	13	41	0.975839	0.190285	0.00383297	1.007	1.025	1.064	0.01	0.04	0.09	3779.3	3845.2	3992.7	3751.5	0.75	1.39	0.67	2.24	13	High	High	High	High	High	High	High	High	High	High	High	High	3822.5	3779.3	3769.3	3835.7	3933.2	3845.2	3981.8	3992.7	4032.5	3701.9	3751.5	3866.5	1	2673.7
High	Master Protein	O74261	Heat shock protein 60, mitochondrial OS=Candida albicans (strain SC5314 / ATCC MYA-2876) OX=237561 GN=HSP60 PE=3 SV=1	53	511	0.165914	0.994109	0.00465514	1.016	1.001	1.05	0.02	0	0.07	105114	103489	108644	103426	1.66	0.73	1.29	0.2	53	High	High	High	High	High	High	High	High	High	High	High	High	104241	107612	105114	102986	104474	103489	106672	108644	109369	103426	103618	103195	1	72912.1
High	Master Protein	A0A1D8PMF5	Complex1_LYR_dom domain-containing protein OS=Candida albicans (strain SC5314 / ATCC MYA-2876) OX=237561 GN=orf19.1267.1 PE=3 SV=1	7	17	0.239036	0.760643	0.00472084	1.026	1.023	1.063	0.04	0.03	0.09	5234.1	5221.9	5427.4	5103.7	0.1	2.56	0.76	1.2	7	High	High	High	High	High	High	High	High	High	High	High	High	5234.1	5243.1	5233.5	5268.4	5221.9	5019.5	5380.3	5462	5427.4	5171.6	5103.7	5048.8	1	3661
High	Master Protein	Q59P08	Glyoxylate reductase OS=Candida albicans (strain SC5314 / ATCC MYA-2876) OX=237561 GN=orf19.1796 PE=3 SV=1	10	22	0.906556	0.0299905	0.00559383	0.998	1.044	1.051	0	0.06	0.07	2804.1	2935.8	2953.6	2810.7	1.75	1.39	1.05	0.68	9	High	High	High	High	High	High	High	High	High	High	High	High	2846.4	2748.8	2804.1	2935.8	2882	2961.8	2942.6	2953.6	3001.2	2841.2	2805.5	2810.7	1	1990.9
High	Master Protein	A0A1D8PGP8	Uncharacterized protein OS=Candida albicans (strain SC5314 / ATCC MYA-2876) OX=237561 GN=orf19.5825.1 PE=3 SV=1	1	1	0.822714	0.298846	0.00592607	0.966	1.098	1.215	-0.05	0.13	0.28	350.3	398.2	440.9	362.8	3.73	3.53	1.62	7.05	1	High	High	High	High	High	High	High	High	High	High	High	High	372.1	348	350.3	405.7	398.2	378.7	442	440.9	429.2	345.9	396.9	362.8	1	260.3
High	Master Protein	A0A1D8PMG0	Nif3p OS=Candida albicans (strain SC5314 / ATCC MYA-2876) OX=237561 GN=NIF3 PE=3 SV=1	9	23	0.992685	0.120373	0.00599968	1.013	0.926	0.851	0.02	-0.11	-0.23	3824.6	3497.7	3214.7	3776.8	1.41	3.01	7.39	1.01	9	High	High	High	High	High	High	High	High	High	High	High	High	3859.5	3753.7	3824.6	3554.2	3497.7	3351.9	2994	3470.5	3214.7	3741.2	3776.8	3817.5	1	2699.6
High	Master Protein	Q5AMP9	F-actin-capping protein subunit beta OS=Candida albicans (strain SC5314 / ATCC MYA-2876) OX=237561 GN=orf19.4597 PE=3 SV=1	11	31	0.999106	0.999639	0.00617648	0.998	0.994	0.95	0	-0.01	-0.07	6695.7	6674.5	6375.7	6711.9	0.66	1.27	1.83	1.11	11	High	High	High	High	High	High	High	High	High	High	High	High	6636.1	6695.7	6722.3	6674.5	6778.2	6609.5	6246.6	6479.2	6375.7	6711.9	6612.6	6758	1	4641.7
High	Master Protein	Q5AK82	Mitochondrial 37S ribosomal protein RSM26 OS=Candida albicans (strain SC5314 / ATCC MYA-2876) OX=237561 GN=orf19.3938 PE=4 SV=1	5	23	0.123555	0.181618	0.00618555	0.966	1.036	1.075	-0.05	0.05	0.1	3057.1	3280.5	3404.5	3165.8	3.49	0.32	0.81	0.65	5	High	High	High	High	High	High	High	High	High	High	High	High	3150	2937.7	3057.1	3264.1	3283.2	3280.5	3425	3404.5	3370.6	3145.6	3165.8	3186.8	1	2203.3
High	Master Protein	Q9P8E3	Protein transport protein SEC61 subunit alpha OS=Candida albicans (strain SC5314 / ATCC MYA-2876) OX=237561 GN=SEC61 PE=3 SV=2	9	33	0.922083	0.0434631	0.00689828	1.016	1.107	1.115	0.02	0.15	0.16	4362.8	4754.9	4790.3	4295.1	4.59	1.41	5.66	2.38	9	High	High	High	High	High	High	High	High	High	High	High	High	4530.9	4133.9	4362.8	4647.4	4769.1	4754.9	5261.2	4764.6	4790.3	4140.4	4331.5	4295.1	1	3169.2
High	Master Protein	A0A1D8PLH0	Phosphomevalonate kinase OS=Candida albicans (strain SC5314 / ATCC MYA-2876) OX=237561 GN=ERG8 PE=2 SV=1	3	4	0.0103081	0.981131	0.00791718	1.073	1.017	0.91	0.1	0.02	-0.14	282.7	267.8	239.6	263.4	2.27	1.81	3.05	0.11	3	High	High	High	High	High	High	High	High	High	High	High	High	278.4	291.1	282.7	268.3	259.8	267.8	252.4	239.5	239.6	263.4	263.4	263.9	1	194.7
High	Master Protein	A0A1D8PRQ3	Ran GTPase-binding protein OS=Candida albicans (strain SC5314 / ATCC MYA-2876) OX=237561 GN=YRB1 PE=4 SV=1	13	127	0.492146	0.0349833	0.00810843	1.045	0.947	0.917	0.06	-0.08	-0.13	27582.6	24998.1	24193	26387.7	1.79	2.98	3.11	1.87	13	High	High	High	High	High	High	High	High	High	High	High	High	27729.7	26816.6	27582.6	25312.1	24998.1	23905.5	23436.3	24938.8	24193	26387.7	27116.4	26168.1	1	19395.7
High	Master Protein	Q5AH41	Iwr1 domain-containing protein OS=Candida albicans (strain SC5314 / ATCC MYA-2876) OX=237561 GN=orf19.6498 PE=3 SV=1	1	3	0.956721	0.11106	0.00826201	1.056	0.926	0.887	0.08	-0.11	-0.17	345	302.3	289.6	326.6	4	0.74	4.73	6.89	1	High	High	High	High	High	High	High	High	High	High	High	High	345	352.3	325.9	300.7	302.3	305.1	289.7	266.6	289.6	317.3	326.6	361.1	1	241.3
High	Master Protein	A0A1D8PNF5	Translation initiation factor eIF5 OS=Candida albicans (strain SC5314 / ATCC MYA-2876) OX=237561 GN=TIF5 PE=1 SV=1	30	149	0.307044	0.999973	0.00832121	0.975	0.993	1.027	-0.04	-0.01	0.04	26940.6	27430.6	28383.4	27626.1	0.66	1.03	1.55	0.98	30	High	High	High	High	High	High	High	High	High	High	High	High	27213.9	26875.7	26940.6	27430.6	27758.6	27195.7	28335.1	28383.4	29128.7	27626.1	27627.6	27161.4	1	19034.9
High	Master Protein	P82611	Aconitate hydratase, mitochondrial OS=Candida albicans (strain SC5314 / ATCC MYA-2876) OX=237561 GN=ACO1 PE=1 SV=2	50	506	0.74552	0.839579	0.00857555	0.976	1.01	1.07	-0.03	0.01	0.1	88726.1	91785.9	97257.8	90881.7	0.76	3.33	2.53	1.38	49	High	High	High	High	High	High	High	High	High	High	High	High	87764.1	89065.8	88726.1	88434.5	91785.9	94532.7	95859.1	97257.8	100682	90914	88745.3	90881.7	1	61387.2
High	Master Protein	Q5AJ71	Carbonic anhydrase OS=Candida albicans (strain SC5314 / ATCC MYA-2876) OX=237561 GN=NCE103 PE=1 SV=1	4	15	0.665476	0.991777	0.00876237	0.951	1.019	1.115	-0.07	0.03	0.16	2345.5	2513.1	2749.3	2466.2	4.06	3.9	1.92	2.75	4	High	High	High	High	High	High	High	High	High	High	High	High	2493.8	2345.5	2312.2	2513.1	2551.1	2368	2749.3	2733.1	2832.4	2387	2466.2	2521.7	1	1744.3
High	Master Protein	Q92210	Phosphoribosylaminoimidazole carboxylase OS=Candida albicans (strain SC5314 / ATCC MYA-2876) OX=237561 GN=ADE2 PE=3 SV=2	24	85	0.0366847	0.270631	0.00885034	0.972	1.029	1.049	-0.04	0.04	0.07	14350.1	15193.7	15480.1	14761.4	0.96	1.61	1.17	0.7	24	High	High	High	High	High	High	High	High	High	High	High	High	14429.9	14163	14350.1	14787.9	15222.3	15193.7	15228.8	15480.1	15577.9	14698.2	14761.4	14899.8	1	10093.1
Medium	None	Q5A3L3	Sphinganine kinase OS=Candida albicans (strain SC5314 / ATCC MYA-2876) OX=237561 GN=LCB4 PE=4 SV=1	1	1	0.404512	0.13242	0.00899232	1.088	0.935	0.848	0.12	-0.1	-0.24	572	491.4	445.9	525.7	3.81	6.12	4.64	5.14	1	High	High	High	High	High	High	High	High	High	High	High	High	572	599.6	556.2	513.4	491.4	454.5	429.7	471.1	445.9	525.7	570.4	519.8	1	400.1
High	Master Protein	A0A1D8PS50	Ras family GTPase OS=Candida albicans (strain SC5314 / ATCC MYA-2876) OX=237561 GN=RSR1 PE=4 SV=1	6	18	0.767504	0.238071	0.00934337	1.008	0.926	0.874	0.01	-0.11	-0.2	3424.8	3144.5	2966.9	3396.5	1.45	1.62	5.13	4.48	6	High	High	High	High	High	High	High	High	High	High	High	High	3372.5	3471.7	3424.8	3071.2	3144.5	3168	2752	3040.3	2966.9	3156.8	3430.6	3396.5	1	2358.9
High	Master Protein	A0A1D8PFL5	Fad3p OS=Candida albicans (strain SC5314 / ATCC MYA-2876) OX=237561 GN=FAD3 PE=4 SV=1	8	15	0.924377	0.976375	0.00970804	0.999	1.024	1.072	0	0.03	0.1	1329.7	1362.7	1426.7	1331.3	1.97	3.03	1.62	1.22	6	High	High	High	High	High	High	High	High	High	High	High	High	1329.7	1375.3	1329.1	1362.7	1364.5	1293.2	1415.6	1426.7	1460.1	1331.3	1346.6	1314	1	930.1
High	Master Protein	Q5AQ76	Protein transport protein SEC24 OS=Candida albicans (strain SC5314 / ATCC MYA-2876) OX=237561 GN=SEC24 PE=3 SV=2	29	75	0.999849	0.00150859	0.0106301	0.997	1.066	1.041	0	0.09	0.06	10141.8	10839.2	10583.1	10169.1	1.15	1.44	1.3	1.39	29	High	High	High	High	High	High	High	High	High	High	High	High	10282.4	10141.8	10049.8	10688.1	10839.2	10999.7	10812.8	10583.1	10564.6	10023.8	10169.1	10305.6	1	7192.1
High	Master Protein	G1UB11	C-22 sterol desaturase ERG5 OS=Candida albicans (strain SC5314 / ATCC MYA-2876) OX=237561 GN=ERG5 PE=3 SV=1	26	104	0.96745	0.215077	0.0107677	1.014	1.078	1.105	0.02	0.11	0.14	20500.7	21781.2	22340.9	20214.5	1.8	1.66	6.8	1.03	26	High	High	High	High	High	High	High	High	High	High	High	High	20500.7	20231	20962.1	21781.2	21869.9	21209	24881.3	22340.9	22012.3	20214.5	20132.7	20529.1	1	14339.3
High	Master Protein	A0A1D8PUC5	Mitochondrial 54S ribosomal protein YmL25 OS=Candida albicans (strain SC5314 / ATCC MYA-2876) OX=237561 GN=CAALFM_CR10830CA PE=4 SV=1	10	21	0.526793	0.97322	0.0120106	0.972	0.989	1.067	-0.04	-0.02	0.09	4707.6	4790.5	5168.2	4844.9	1.01	3.37	1.31	1.68	10	High	High	High	High	High	High	High	High	High	High	High	High	4707.6	4646.1	4739.8	4790.5	5029.1	4717.3	5168.2	5229.2	5094.5	4868.3	4717.7	4844.9	1	3292.8
High	Master Protein	O59933	C-4 methylsterol oxidase OS=Candida albicans (strain SC5314 / ATCC MYA-2876) OX=237561 GN=ERG25 PE=1 SV=1	3	3	0.702245	0.135565	0.0121351	1.021	1.129	1.166	0.03	0.18	0.22	549.2	607.4	627	537.8	4.61	6.64	6.5	4.07	3	High	High	High	High	High	High	High	High	High	High	High	High	549.2	593.9	548.7	607.4	558.7	637.9	625.5	627	699.5	514.2	537.8	557.8	1	384.2
High	Master Protein	Q59LQ6	Translation initiation factor eIF1 OS=Candida albicans (strain SC5314 / ATCC MYA-2876) OX=237561 GN=SUI1 PE=3 SV=1	7	53	0.626302	0.911395	0.0121383	0.992	1.007	1.038	-0.01	0.01	0.05	4966.3	5040.7	5193.6	5004	2.12	0.26	1.05	0.37	7	High	High	High	High	High	High	High	High	High	High	High	High	4966.3	4838.3	5046	5056.1	5029.5	5040.7	5193.6	5189.7	5286.6	5004	4994.7	5030.7	1	3473.7
High	Master Protein	Q59P52	Phosphoserine aminotransferase OS=Candida albicans (strain SC5314 / ATCC MYA-2876) OX=237561 GN=SER1 PE=3 SV=1	25	81	0.999648	0.0314339	0.0125482	1.004	1.044	1.047	0.01	0.06	0.07	19255.2	20029.6	20078.7	19176.5	1.14	1.29	0.24	1.98	25	High	High	High	High	High	High	High	High	High	High	High	High	19371.8	18948.2	19255.2	19621.6	20029.6	20098.3	20099	20078.7	20007.1	19176.5	18792.3	19551.4	1	13549.7
High	Master Protein	A0A1D8PJ64	Arf3p OS=Candida albicans (strain SC5314 / ATCC MYA-2876) OX=237561 GN=ARF3 PE=1 SV=1	5	13	0.876995	0.0358715	0.0126273	0.947	1.072	1.114	-0.08	0.1	0.16	1695.9	1920.4	1995.1	1791.2	3.4	5.1	2.74	2.93	4	High	High	High	High	High	High	High	High	High	High	High	High	1792.9	1695.9	1687.3	1920.4	1876.8	2067.2	1995.1	1946	2055.4	1704.2	1796	1791.2	1	1254.1
High	Master Protein	Q59ZG6	Ribosome production factor 2 homolog OS=Candida albicans (strain SC5314 / ATCC MYA-2876) OX=237561 GN=RPF2 PE=3 SV=1	13	40	0.563254	0.345378	0.0127704	0.961	1.051	1.129	-0.06	0.07	0.17	8042.6	8796.1	9446.2	8370.5	1.92	2	5.38	1.71	13	High	High	High	High	High	High	High	High	High	High	High	High	8277.4	7983.1	8042.6	8601.1	8796.1	8951.2	8812.7	9446.2	9806.1	8370.5	8537.8	8252.1	1	5789.7
High	Master Protein	Q5AH90	Rho family guanine nucleotide exchange factor OS=Candida albicans (strain SC5314 / ATCC MYA-2876) OX=237561 GN=ROM2 PE=4 SV=1	3	7	0.994147	0.0688171	0.0141039	1.012	0.895	0.867	0.02	-0.16	-0.21	866.7	766	742.3	856.1	4.04	5.28	3.02	2.52	3	High	High	High	High	High	High	High	High	High	High	High	High	895.6	826.3	866.7	826.6	766	747.9	778	735.9	742.3	877.3	856.1	834.2	1	626.5
High	Master Protein	A0A1D8PD81	Aspartate--tRNA ligase OS=Candida albicans (strain SC5314 / ATCC MYA-2876) OX=237561 GN=orf19.4478 PE=3 SV=1	4	6	0.793485	0.365393	0.0145098	1.03	0.96	0.922	0.04	-0.06	-0.12	890.2	830	797.2	864.4	3.49	2.69	2.3	1.12	4	High	High	High	High	High	High	High	High	High	High	High	High	850.5	890.2	911.2	861	830	817.4	777.1	797.2	813.6	864.4	858.5	877.5	1	594.9
Medium	Master Protein Candidate	Q59S74	FtsJ domain-containing protein OS=Candida albicans (strain SC5314 / ATCC MYA-2876) OX=237561 GN=orf19.3466 PE=4 SV=1	1	3	0.133635	0.226978	0.0147374	1.125	0.863	0.776	0.17	-0.21	-0.37	891.1	683.6	614.7	792.1	12.56	3.92	4.15	6.4	1	High	High	High	High	High	High	High	High	High	High	High	High	829.8	1054.6	891.1	724.9	673.6	683.6	614.7	589.6	640.6	792.1	739.4	840.6	1	580.4
Medium	Master Protein	A0A1D8PRJ9	Faa2-3p OS=Candida albicans (strain SC5314 / ATCC MYA-2876) OX=237561 GN=FAA2-3 PE=4 SV=1	1	3	0.133635	0.226978	0.0147374	1.125	0.863	0.776	0.17	-0.21	-0.37	891.1	683.6	614.7	792.1	12.56	3.92	4.15	6.4	1	High	High	High	High	High	High	High	High	High	High	High	High	829.8	1054.6	891.1	724.9	673.6	683.6	614.7	589.6	640.6	792.1	739.4	840.6	1	580.4
High	Master Protein	A0A1D8PRH0	Proteinase B OS=Candida albicans (strain SC5314 / ATCC MYA-2876) OX=237561 GN=orf19.7196 PE=3 SV=1	8	20	0.677897	0.105542	0.0148608	1.011	0.968	0.939	0.02	-0.05	-0.09	5696.9	5452.8	5286.2	5632.5	0.92	3.17	2.13	1.63	8	High	High	High	High	High	High	High	High	High	High	High	High	5696.2	5788	5696.9	5462	5452.8	5163	5297	5286.2	5099.2	5695.6	5515.1	5632.5	1	3984.3
High	Master Protein	A0A1D8PH11	Dck1p OS=Candida albicans (strain SC5314 / ATCC MYA-2876) OX=237561 GN=DCK1 PE=3 SV=1	13	24	0.410711	0.0445249	0.0150574	1.016	1.04	1.06	0.02	0.06	0.08	2292.1	2346.7	2391	2256.5	2.33	1.52	0.72	2.28	13	High	High	High	High	High	High	High	High	High	High	High	High	2353.3	2246.5	2292.1	2323.2	2346.7	2393.5	2393.6	2362.6	2391	2184.5	2256.5	2283.4	1	1646
High	Master Protein	A0A1D8PC43	Diphosphomevalonate decarboxylase OS=Candida albicans (strain SC5314 / ATCC MYA-2876) OX=237561 GN=MVD PE=1 SV=1	21	103	0.919604	0.106975	0.0160689	0.999	1.04	1.047	0	0.06	0.07	19078.4	19866.9	19996.3	19105.6	1.02	1.53	1.35	1.35	21	High	High	High	High	High	High	High	High	High	High	High	High	19078.4	18802.3	19177.1	19363.6	19866.9	19902	20276.9	19738.1	19996.3	19105.6	18916.1	19428.2	1	13344.5
High	Master Protein	Q5ANB5	Uncharacterized protein OS=Candida albicans (strain SC5314 / ATCC MYA-2876) OX=237561 GN=orf19.5989 PE=4 SV=1	8	28	0.632855	0.345425	0.0164788	0.985	1.017	1.029	-0.02	0.02	0.04	5869.4	6059.2	6133.6	5959.4	0.69	1.3	0.98	1.2	8	High	High	High	High	High	High	High	High	High	High	High	High	5892.5	5814.3	5869.4	5924.5	6061.1	6059.2	6192.4	6072.2	6133.6	5965.8	5839.9	5959.4	1	4121.6
High	Master Protein	Q5AN96	Elongation of fatty acids protein OS=Candida albicans (strain SC5314 / ATCC MYA-2876) OX=237561 GN=orf19.6007 PE=3 SV=1	5	11	0.204961	0.387963	0.0166662	0.922	1.052	1.113	-0.12	0.07	0.15	1527.3	1743.6	1844.4	1656.8	4.42	2.18	3.06	3.46	4	High	High	High	High	High	High	High	High	High	High	High	High	1638.7	1527.3	1512.7	1692.4	1766.1	1743.6	1905.9	1844.4	1793.1	1598	1712.7	1656.8	1	1146.2
High	Master Protein	Q59VW7	Mitochondrial import inner membrane translocase subunit TIM21 OS=Candida albicans (strain SC5314 / ATCC MYA-2876) OX=237561 GN=TIM21 PE=3 SV=1	3	7	0.421011	0.57414	0.0166789	0.98	1.03	1.102	-0.03	0.04	0.14	1433.1	1506.1	1611.5	1461.8	2.27	4.1	2.48	2.53	3	High	High	High	High	High	High	High	High	High	High	High	High	1443.3	1433.1	1383.1	1506.1	1593.2	1472	1611.5	1668.6	1590.9	1447.5	1461.8	1518.2	1	1009.5
High	Master Protein	A0A1D8PMU4	Uncharacterized protein OS=Candida albicans (strain SC5314 / ATCC MYA-2876) OX=237561 GN=orf19.5688 PE=4 SV=1	4	10	0.984348	0.082127	0.0174805	1.003	0.947	0.925	0	-0.08	-0.11	1401.4	1322.6	1291.2	1396.6	1.94	4.37	2.78	2.85	4	High	High	High	High	High	High	High	High	High	High	High	High	1375	1401.4	1429.3	1322.6	1370.1	1255.7	1291.2	1306.7	1238.8	1396.6	1386.4	1460.8	1	961.7
High	Master Protein	P83777	Inorganic pyrophosphatase OS=Candida albicans (strain SC5314 / ATCC MYA-2876) OX=237561 GN=IPP1 PE=1 SV=3	21	249	0.911697	0.0618659	0.0177246	0.998	1.051	1.058	0	0.07	0.08	39007.5	41072.3	41379.4	39092.9	2.43	0.65	3.4	0.33	21	High	High	High	High	High	High	High	High	High	High	High	High	39336.6	37572.4	39007.5	41072.3	40992.8	41491.3	43447.9	40717.2	41379.4	39184.3	38931.4	39092.9	1	27514.2
High	Master Protein	A0A1D8PPD0	Uncharacterized protein OS=Candida albicans (strain SC5314 / ATCC MYA-2876) OX=237561 GN=orf19.1186 PE=3 SV=1	1	2	0.99945	0.00105117	0.0179643	1.008	1.44	1.25	0.01	0.53	0.32	321.8	459.7	399.1	319.3	4.78	7.7	9.5	3.82	1	High	High	High	High	High	High	High	High	High	High	High	High	306	336.7	321.8	459.7	418.5	488.2	399.1	361.7	437.6	331.7	319.3	307.3	1	214
High	Master Protein	A0A1D8PI95	Peptide hydrolase OS=Candida albicans (strain SC5314 / ATCC MYA-2876) OX=237561 GN=APE3 PE=3 SV=1	11	36	0.248488	0.361901	0.0180744	1.027	0.984	0.962	0.04	-0.02	-0.06	6149.6	5889.3	5763.2	5987.8	0.53	1.66	1.87	0.95	11	High	High	High	High	High	High	High	High	High	High	High	High	6105.1	6149.6	6169	5984.3	5889.3	5789	5843.2	5763.2	5630.9	6066.3	5954.8	5987.8	1	4270.3
High	Master Protein	A0A1D8PRJ1	PALP domain-containing protein OS=Candida albicans (strain SC5314 / ATCC MYA-2876) OX=237561 GN=orf19.7152 PE=4 SV=1	13	43	0.999994	0.130368	0.0184349	1.003	1.025	1.042	0	0.04	0.06	7497.9	7659.5	7790	7472.6	0.66	1.44	0.7	1.12	13	High	High	High	High	High	High	High	High	High	High	High	High	7497.9	7564.2	7466.9	7569.4	7659.5	7788.7	7701	7798.4	7790	7608.3	7472.6	7453.3	1	5244.5
High	Master Protein	P46586	ATP phosphoribosyltransferase OS=Candida albicans (strain SC5314 / ATCC MYA-2876) OX=237561 GN=HIS1 PE=1 SV=1	27	77	0.775465	0.0507024	0.0203907	0.986	1.036	1.069	-0.02	0.05	0.1	12834.2	13489.1	13916.9	13020.4	1.39	2.35	2.7	0.85	27	High	High	High	High	High	High	High	High	High	High	High	High	12563.5	12834.2	12896.8	13434.3	13489.1	14014.1	14084.3	13373.2	13916.9	13030.9	12835.4	13020.4	1	8787.6
High	Master Protein	A0A1D8PKB2	Aa_trans domain-containing protein OS=Candida albicans (strain SC5314 / ATCC MYA-2876) OX=237561 GN=orf19.6984 PE=3 SV=1	2	2	0.551417	0.999466	0.0204632	0.993	1.027	0.808	-0.01	0.04	-0.31	360.9	373.3	293.4	363.4	12.41	3.77	5.59	7.93	2	High	High	High	High	High	High	High	High	High	High	High	High	370.8	360.9	292.9	354.6	381.9	373.3	293.4	299.9	269.4	406.6	349.9	363.4	1	259.3
High	Master Protein	A0A1D8PT53	Putative ATP-dependent permease OS=Candida albicans (strain SC5314 / ATCC MYA-2876) OX=237561 GN=ADP1 PE=4 SV=1	2	2	0.83724	0.00385485	0.0206892	0.996	0.902	0.915	-0.01	-0.15	-0.13	236.2	214	216.9	237.1	1.15	4.09	3.08	1.83	2	High	High	High	High	High	High	High	High	High	High	High	High	236.2	236.7	231.8	214	221.3	204	216.9	227.1	214.4	244.4	237.1	236.6	1	165.2
High	Master Protein	Q5A3P1	Exosome catalytic subunit OS=Candida albicans (strain SC5314 / ATCC MYA-2876) OX=237561 GN=orf19.5229 PE=3 SV=1	21	54	0.15637	0.123092	0.0208287	1.029	0.973	0.969	0.04	-0.04	-0.05	7968.6	7535.5	7504.3	7745.6	1.61	1.04	1.45	0.26	21	High	High	High	High	High	High	High	High	High	High	High	High	8039.5	7968.6	7791	7483.4	7535.5	7638.1	7334	7535.6	7504.3	7766.7	7745.6	7727.2	1	5623.3
High	Master Protein	Q59VG6	Delta(7)-sterol 5(6)-desaturase ERG3 OS=Candida albicans (strain SC5314 / ATCC MYA-2876) OX=237561 GN=ERG3 PE=2 SV=1	10	33	0.90699	0.00938952	0.0209716	1.017	1.192	1.146	0.03	0.25	0.2	6070.2	7112.4	6839.8	5965.9	1.84	4.76	6.78	1.66	10	High	High	High	High	High	High	High	High	High	High	High	High	5964.1	6070.2	6187.5	7168.5	7112.4	6569.9	7251.9	6839.8	6329.9	5820.6	5965.9	6008.3	1	4171.6
High	Master Protein	A0A1D8PQH5	Superoxide dismutase OS=Candida albicans (strain SC5314 / ATCC MYA-2876) OX=237561 GN=SOD3 PE=3 SV=1	7	25	0.99293	0.346817	0.0212593	1.019	1.162	1.229	0.03	0.22	0.3	4365.2	4979.2	5262.8	4283.8	6.62	7.48	6.89	6.39	6	High	High	High	High	High	High	High	High	High	High	High	High	4476.6	3941.6	4365.2	4371.9	4979.2	5003.5	5057.4	5775	5262.8	4619.4	4283.8	4071.2	1	3131.2
Low	Master Protein	Q5A8N2	Candidapepsin-4 OS=Candida albicans (strain SC5314 / ATCC MYA-2876) OX=237561 GN=SAP4 PE=1 SV=1	1	6	0.498222	0.323035	0.0219647	1.026	0.885	0.801	0.04	-0.18	-0.32	2298.3	1983.7	1795.7	2240.5	9.42	0.72	1.9	6.64	1	High	High	High	High	High	High	High	High	High	High	High	High	2140.7	2575.6	2298.3	1981.6	2007.4	1983.7	1853.4	1791.8	1795.7	2279	2011.8	2240.5	1	1497.4
High	Master Protein	A0A1D8PFU6	AP complex subunit beta OS=Candida albicans (strain SC5314 / ATCC MYA-2876) OX=237561 GN=APL1 PE=3 SV=1	2	2	0.1738	0.933455	0.0225384	1.05	0.994	0.932	0.07	-0.01	-0.1	266.8	252.6	236.8	254.1	4.14	2.67	1.56	1.86	2	High	High	High	High	High	High	High	High	High	High	High	High	282.2	260.5	266.8	259.7	246.2	252.6	238.2	236.8	231.2	254.1	252.8	261.6	1	197.4
High	Master Protein	A0A1D8PR55	Uncharacterized protein (Fragment) OS=Candida albicans (strain SC5314 / ATCC MYA-2876) OX=237561 GN=CAALFM_C702610CA PE=4 SV=1	9	14	0.926497	0.446794	0.0241921	1.022	0.915	0.773	0.03	-0.13	-0.37	4827.3	4320.7	3651.7	4723.8	2.89	3.37	12.16	3.2	9	High	High	High	High	High	High	High	High	High	High	High	High	4701.4	4827.3	4980.2	4320.7	4157.6	4446.9	4394.5	3651.7	3526.8	4807.5	4516.3	4723.8	1	3288.5
High	Master Protein	Q59LZ5	Protein channel OS=Candida albicans (strain SC5314 / ATCC MYA-2876) OX=237561 GN=TOM70 PE=4 SV=1	45	232	0.904639	0.554955	0.0242921	0.993	1.014	1.035	-0.01	0.02	0.05	44805	45747.4	46679.2	45102.6	1.22	0.99	0.94	0.57	45	High	High	High	High	High	High	High	High	High	High	High	High	44590.5	45633.3	44805	45271.5	45747.4	46172.1	46679.2	46105.6	46965.9	45087.9	45102.6	45545.5	1	31189.1
High	Master Protein	Q5A646	Mrp8p OS=Candida albicans (strain SC5314 / ATCC MYA-2876) OX=237561 GN=MRP8 PE=4 SV=1	8	23	0.998008	0.0426559	0.024298	0.984	1.068	1.065	-0.02	0.09	0.09	3065	3325.4	3316.1	3115	1.08	3.01	2.17	3.74	8	High	High	High	High	High	High	High	High	High	High	High	High	3065	3107.7	3042.4	3214.6	3413.7	3325.4	3316.1	3430.2	3295.2	3115	2957.3	3182.1	1	2143.8
High	Master Protein	Q59VH0	Nuclear cap-binding protein subunit 2 OS=Candida albicans (strain SC5314 / ATCC MYA-2876) OX=237561 GN=orf19.763 PE=3 SV=1	4	17	0.857248	0.0385023	0.0244428	1.017	0.933	0.933	0.02	-0.1	-0.1	2208.3	2025.9	2025.6	2170.9	2.83	3.32	2.25	1.22	4	High	High	High	High	High	High	High	High	High	High	High	High	2280.9	2208.3	2156.1	2103	2025.9	1968.4	2059.6	2025.6	1969.8	2208.5	2157.2	2170.9	1	1595.4
Low	Master Protein	Q5A896	MFS domain-containing protein OS=Candida albicans (strain SC5314 / ATCC MYA-2876) OX=237561 GN=CAALFM_CR01220WA PE=4 SV=1	1	5	0.659779	0.0705182	0.0247181	1.048	0.861	0.857	0.07	-0.22	-0.22	3165.2	2601.9	2587.6	3020.5	3.21	7.6	1.9	3.5	1	High	High	High	High	High	High	High	High	High	High	High	High	2992.7	3165.8	3165.2	2898.8	2601.9	2510.8	2587.6	2644.2	2546.2	3020.5	3050.5	2856.9	1	2093.3
High	Master Protein	Q5ANE3	Non-classical export protein 102 OS=Candida albicans (strain SC5314 / ATCC MYA-2876) OX=237561 GN=NCE102 PE=1 SV=1	2	18	0.794437	0.112891	0.0248254	1.013	0.939	0.926	0.02	-0.09	-0.11	2643.5	2450.4	2417.8	2609.8	2.89	1.32	4.6	1.34	2	High	High	High	High	High	High	High	High	High	High	High	High	2772.5	2633.3	2643.5	2447.9	2505.7	2450.4	2417.8	2513.1	2292.1	2600	2609.8	2665.4	1	1939.3
High	Master Protein	Q5AAU3	Protein transport protein SEC31 OS=Candida albicans (strain SC5314 / ATCC MYA-2876) OX=237561 GN=PGA63 PE=3 SV=2	56	158	0.784742	0.0172585	0.0250136	1.004	1.054	1.036	0.01	0.08	0.05	27808	29170.3	28682.2	27688.9	0.86	1.67	2.73	1.6	55	High	High	High	High	High	High	High	High	High	High	High	High	27808	27709.5	28165.4	28714.5	29170.3	29690.2	29990.7	28558	28682.2	27004.9	27688.9	27823.9	1	19450.5
High	Master Protein	A0A1D8PRY3	ATP synthase subunit gamma OS=Candida albicans (strain SC5314 / ATCC MYA-2876) OX=237561 GN=ATP3 PE=3 SV=1	23	202	0.0743572	0.451499	0.0252867	0.9	1.028	1.087	-0.15	0.04	0.12	33569.5	38357.1	40554.8	37299.8	5.65	0.49	1.47	3.42	23	High	High	High	High	High	High	High	High	High	High	High	High	35888.3	32093.6	33569.5	38058.7	38404.9	38357.1	40037.8	41224.7	40554.8	37299.8	37492.9	35232.4	1	25102.3
High	None	A0A1D8PCH9	Pox18p OS=Candida albicans (strain SC5314 / ATCC MYA-2876) OX=237561 GN=POX18 PE=4 SV=1	1	4	0.501967	0.669024	0.0254379	0.926	1.056	1.142	-0.11	0.08	0.19	968.8	1103.7	1194.1	1045.7	8.48	1.84	6.05	2.64	1	High	High	High	High	High	High	High	High	High	High	High	High	1077.2	912.7	968.8	1103.7	1124.4	1083.7	1194.1	1190.6	1321.8	1045.7	1078.7	1023.7	1	753.5
Low	Master Protein	A0A1D8PDN0	Uncharacterized protein OS=Candida albicans (strain SC5314 / ATCC MYA-2876) OX=237561 GN=orf19.2478 PE=4 SV=1	1	12	0.519031	0.56813	0.0255784	1.108	0.841	0.677	0.15	-0.25	-0.56	5200.1	3945	3179	4693.3	15.35	3.69	15.97	11.02	1	High	High	High	High	High	High	High	High	High	High	High	High	4594	6214.9	5200.1	3945	3869.5	4153.5	2646.3	3179	3655.2	4693.3	4044.1	5041.2	1	3213.3
High	Master Protein	A0A1D8PNC8	Proteasome subunit beta OS=Candida albicans (strain SC5314 / ATCC MYA-2876) OX=237561 GN=PRE4 PE=3 SV=1	13	74	0.998111	0.241871	0.0263031	0.998	0.976	0.968	0	-0.03	-0.05	13487.1	13198.2	13084.2	13517.2	0.75	1.65	0.28	1.01	13	High	High	High	High	High	High	High	High	High	High	High	High	13586.4	13384.4	13487.1	13516.2	13198.2	13097.9	13084.2	13130.3	13056.8	13363.9	13517.2	13636	1	9503.1
High	Master Protein	A0A1D8PDW1	Ribosomal RNA-processing protein 43 OS=Candida albicans (strain SC5314 / ATCC MYA-2876) OX=237561 GN=orf19.6259 PE=3 SV=1	7	15	0.96214	0.830075	0.0265336	1.012	1.003	1.071	0.02	0	0.1	2340.1	2318.5	2476.8	2311.9	3.45	2.55	1.15	1.18	7	High	High	High	High	High	High	High	High	High	High	High	High	2387	2231	2340.1	2285.8	2318.5	2401.3	2428.9	2478.7	2476.8	2315	2266.5	2311.9	1	1669.6
High	Master Protein	A0A1D8PLP3	Complex III subunit 9 OS=Candida albicans (strain SC5314 / ATCC MYA-2876) OX=237561 GN=QCR9 PE=1 SV=1	4	28	0.996227	0.846786	0.0273938	1.017	0.985	0.835	0.02	-0.02	-0.26	5076	4916.7	4168.6	4989.6	5.63	6.46	5.61	6.64	4	High	High	High	High	High	High	High	High	High	High	High	High	5395.6	5076	4822.9	4916.7	5117	4502.8	3995.3	4462.1	4168.6	4742.9	4989.6	5405.6	1	3774
High	Master Protein	A0A1D8PHY2	Mitochondrial 54S ribosomal protein YmL7/YmL5 OS=Candida albicans (strain SC5314 / ATCC MYA-2876) OX=237561 GN=orf19.2214 PE=3 SV=1	13	33	0.549955	1	0.0277502	0.967	1.004	1.085	-0.05	0.01	0.12	7943.9	8242.7	8910.5	8213.4	1.82	4.69	1.13	2.28	13	High	High	High	High	High	High	High	High	High	High	High	High	8156.8	7943.9	7878.3	8242.7	8646.3	7872.9	8910.5	9080.9	8900.9	8452.1	8081.2	8213.4	1	5705.4
High	Master Protein	Q59RK9	Mitochondrial intermediate peptidase OS=Candida albicans (strain SC5314 / ATCC MYA-2876) OX=237561 GN=OCT1 PE=3 SV=2	5	5	0.959157	0.803617	0.0281133	1.029	1.048	1.152	0.04	0.07	0.2	418.5	426.1	468.6	406.7	2.25	5.53	3.52	3.89	5	High	High	High	High	High	High	High	High	High	High	High	High	410.4	429.2	418.5	448.6	401.5	426.1	468.6	446.2	478	400.8	406.7	431.1	1	287.1
Medium	Master Protein	P42800	Inositol-3-phosphate synthase OS=Candida albicans (strain SC5314 / ATCC MYA-2876) OX=237561 GN=INO1 PE=3 SV=1	1	1	0.459419	0.0264345	0.0283666	0.895	0.784	0.729	-0.16	-0.35	-0.46	139.4	122.2	113.6	155.8	3.98	3.89	16.1	7.39	1	High	High	High	High	High	High	High	High	High	High	High	High	138.8	139.4	148.9	122.2	126.4	116.9	146.1	110.1	113.6	155.8	150.3	172.9	1	97.1
High	Master Protein	Q59RA2	CDP-diacylglycerol--inositol 3-phosphatidyltransferase OS=Candida albicans (strain SC5314 / ATCC MYA-2876) OX=237561 GN=orf19.6860 PE=3 SV=1	2	3	0.415179	0.152226	0.0286272	1.071	0.911	0.848	0.1	-0.13	-0.24	1254.2	1066.3	993.4	1170.7	2.59	7.52	3.54	3.9	2	High	High	High	High	High	High	High	High	High	High	High	High	1261.9	1254.2	1202.8	1136.7	1066.3	977.7	986.5	1051.6	993.4	1114.8	1170.7	1204.7	1	882.6
Low	Master Protein	P32503	Major capsid protein CONTAMINANT OS=Saccharomyces cerevisiae virus L-A GN=gag PE=1 SV=1	1	6	0.668199	0.229859	0.0287673	1.082	0.833	0.791	0.11	-0.26	-0.34	3535.6	2721.5	2584.6	3267.4	1.04	11.38	9.43	5.87	1	High	High	High	High	High	High	High	High	High	High	High	High	3489.9	3562.7	3535.6	3251.6	2721.5	2654	2378.2	2868.3	2584.6	3267.4	3480.2	3095.7	1	2441
High	Master Protein	Q5AH35	Mitochondrial 54S ribosomal protein MRP49 OS=Candida albicans (strain SC5314 / ATCC MYA-2876) OX=237561 GN=orf19.6503 PE=4 SV=1	15	42	0.129588	0.908501	0.0294564	0.972	1.005	1.051	-0.04	0.01	0.07	7015.1	7253.9	7589.1	7217.7	2.15	2.45	2.15	1.11	15	High	High	High	High	High	High	High	High	High	High	High	High	7028	6763.8	7015.1	7167.9	7253.9	7511.8	7566	7589.1	7862	7217.7	7316.8	7157.1	1	4915.8
High	Master Protein	P83775	Putative NADPH-dependent methylglyoxal reductase GRP2 OS=Candida albicans (strain SC5314 / ATCC MYA-2876) OX=237561 GN=GRP2 PE=1 SV=2	30	189	0.997999	0.776899	0.029495	0.983	1.009	1.041	-0.02	0.01	0.06	36768.6	37740.1	38929.2	37389.3	1.64	2.22	0.16	1.96	29	High	High	High	High	High	High	High	High	High	High	High	High	36768.6	36737.2	37805.7	37740.1	38205.4	36589.9	38929.2	38824.7	38934	37480.9	37389.3	36178.9	1	25718
High	Master Protein	A0A1D8PKT0	Tcc1p OS=Candida albicans (strain SC5314 / ATCC MYA-2876) OX=237561 GN=TCC1 PE=4 SV=1	9	19	0.994495	0.127334	0.0297778	1.006	0.936	0.899	0.01	-0.1	-0.15	3146.2	2925.4	2811.2	3126.5	0.51	3.75	4.26	3.67	9	High	High	High	High	High	High	High	High	High	High	High	High	3146.2	3159	3127.3	2925.4	3014.6	2797.4	2811.2	2959.9	2720.8	3008.7	3238	3126.5	1	2200.6
High	Master Protein	A0A1D8PKJ4	Saccharopine dehydrogenase (NADP+, L-glutamate-forming) OS=Candida albicans (strain SC5314 / ATCC MYA-2876) OX=237561 GN=LYS9 PE=4 SV=1	32	96	0.0442251	0.127728	0.0301443	1.048	1.042	1.05	0.07	0.06	0.07	16921	16830.6	16957.9	16148.9	1.54	2.12	2.64	2.49	32	High	High	High	High	High	High	High	High	High	High	High	High	16861.6	17341.8	16921	17155.9	16830.6	16442.8	17643.7	16788.4	16957.9	16148.9	15608.2	16390.1	1	11794
High	Master Protein	Q59TD5	NADH dehydrogenase [ubiquinone] flavoprotein 1, mitochondrial OS=Candida albicans (strain SC5314 / ATCC MYA-2876) OX=237561 GN=NDH51 PE=3 SV=1	33	193	0.996955	0.707889	0.0310621	0.995	1.016	1.037	-0.01	0.02	0.05	30253.6	30893.4	31534.5	30414.7	1.37	1.66	0.42	0.88	32	High	High	High	High	High	High	High	High	High	High	High	High	30102.3	30890	30253.6	30243.1	31250	30893.4	31400	31662.1	31534.5	30414.7	30237.3	30766.3	1	21055.2
High	Master Protein	A0A1D8PTD1	Bifunctional carbamoylphosphate synthetase/aspartate transcarbamylase OS=Candida albicans (strain SC5314 / ATCC MYA-2876) OX=237561 GN=URA2 PE=3 SV=1	130	674	0.998626	0.617254	0.0312445	0.998	1.015	1.058	0	0.02	0.08	120090	122133	127220	120280	0.71	2.11	1.93	1.56	124	High	High	High	High	High	High	High	High	High	High	High	High	120434	120090	118812	119513	124668	122133	123179	127542	127220	120280	118056	121772	1	84238.6
High	Master Protein	P83781	Mitochondrial outer membrane protein porin OS=Candida albicans (strain SC5314 / ATCC MYA-2876) OX=237561 GN=POR1 PE=1 SV=2	21	304	0.995136	0.388882	0.031555	1.001	1.022	1.056	0	0.03	0.08	44623.7	45590.7	47076.2	44589.5	0.59	2.09	3.44	0.67	21	High	High	High	High	High	High	High	High	High	High	High	High	44270.1	44781.8	44623.7	45349.1	45590.7	47124.2	49273.1	46081.4	47076.2	44531.9	45079	44589.5	1	30965
High	Master Protein	A0A1D8PUA6	DNA-directed RNA polymerase subunit OS=Candida albicans (strain SC5314 / ATCC MYA-2876) OX=237561 GN=RPO21 PE=3 SV=1	57	167	0.569362	0.191582	0.0318548	1.006	0.977	0.965	0.01	-0.03	-0.05	26118.9	25387.4	25051.9	25973.4	0.73	0.4	1.18	0.97	55	High	High	High	High	High	High	High	High	High	High	High	High	26118.9	26251.1	25875.4	25356.3	25544.9	25387.4	25051.9	25542.1	25008	25548.9	25973.4	25989	1	18269
High	Master Protein	A0A1D8PPR6	Mitochondrial 37S ribosomal protein YmS18 OS=Candida albicans (strain SC5314 / ATCC MYA-2876) OX=237561 GN=orf19.688 PE=3 SV=1	15	41	0.690609	0.841993	0.0322563	0.967	1.006	1.081	-0.05	0.01	0.11	8090.5	8415.6	9041.3	8362.8	1.61	4.6	1.7	1.81	15	High	High	High	High	High	High	High	High	High	High	High	High	8216.9	7956	8090.5	8415.6	8855.3	8080.7	9069.7	9041.3	8793.2	8362.8	8119.5	8393.1	1	5747.3
High	Master Protein	A0A1D8PUA8	Pop3p OS=Candida albicans (strain SC5314 / ATCC MYA-2876) OX=237561 GN=POP3 PE=4 SV=1	4	7	0.272899	0.565203	0.0333492	1.029	0.958	0.909	0.04	-0.06	-0.14	1888.8	1758.4	1668.5	1834.8	2.3	4.15	3.44	2.94	4	High	High	High	High	High	High	High	High	High	High	High	High	1888.8	1959.8	1879.2	1669.6	1758.4	1813.1	1584.6	1668.5	1692.5	1834.8	1749.6	1847.7	1	1321.2
High	Master Protein	Q5ANK2	Protein kinase C OS=Candida albicans (strain SC5314 / ATCC MYA-2876) OX=237561 GN=PKC1 PE=3 SV=1	9	21	0.553213	0.309687	0.0335588	1.099	0.898	0.834	0.14	-0.16	-0.26	3483.3	2845.3	2643.6	3168.1	9.14	3.42	5.34	3.29	9	High	High	High	High	High	High	High	High	High	High	High	High	3030.2	3619.9	3483.3	2845.3	2812	2997.1	2545.1	2643.6	2826	3168.1	3047	3253.4	1	2119.5
Medium	Master Protein	A0A1D8PP62	Tip20p OS=Candida albicans (strain SC5314 / ATCC MYA-2876) OX=237561 GN=TIP20 PE=4 SV=1	1	1	0.970424	0.0702711	0.0339946	0.961	1.125	1.2	-0.06	0.17	0.26	133.2	155.8	166.2	138.5	3.67	10.19	3.83	9.31	1	High	High	High	High	High	High	High	High	High	High	High	High	133.2	127.7	137.4	155.8	151.7	182.3	166.2	162.5	175	123.1	148.3	138.5	1	93.1
High	Master Protein	A0A1D8PG09	Stf2p OS=Candida albicans (strain SC5314 / ATCC MYA-2876) OX=237561 GN=STF2 PE=4 SV=1	8	45	0.989752	0.919064	0.0342906	0.993	1.028	0.861	-0.01	0.04	-0.22	7710	7981.3	6681.5	7764	3.02	2.38	7.35	4.22	8	High	High	High	High	High	High	High	High	High	High	High	High	7844.1	7393.8	7710	7981.3	8075.6	7712.7	7341.1	6681.5	6361.2	8053.2	7400.7	7764	1	5486.6
Low	Master Protein	A0A1D8PE08	Taf145p OS=Candida albicans (strain SC5314 / ATCC MYA-2876) OX=237561 GN=TAF145 PE=4 SV=1	1	5	0.999757	0.0463027	0.0345201	1.005	1.191	1.131	0.01	0.25	0.18	884	1047.2	995	879.5	2.66	6.6	5.18	4.68	1	High	High	High	High	High	High	High	High	High	High	High	High	884	854.3	900.4	1049.2	932.8	1047.2	980.3	995	1078.1	879.5	926	843.7	1	618.3
Medium	None	A0A1D8PD25	Age1p OS=Candida albicans (strain SC5314 / ATCC MYA-2876) OX=237561 GN=AGE1 PE=4 SV=1	1	7	0.022991	0.978602	0.0350409	0.871	0.995	1.108	-0.2	-0.01	0.15	1674.2	1912	2130.1	1922	3.26	1.14	4.59	5.24	1	High	High	High	High	High	High	High	High	High	High	High	High	1723.7	1614.9	1674.2	1912	1927.7	1884.8	2189.6	2130.1	2000.4	1922	1962.2	1774.3	1	1205.6
Low	Master Protein	Q5A5R4	DNA helicase OS=Candida albicans (strain SC5314 / ATCC MYA-2876) OX=237561 GN=SGS1 PE=3 SV=1	1	3	0.22438	0.45613	0.0353087	1.226	0.932	0.822	0.29	-0.1	-0.28	468.5	356.3	314.2	382.2	11.03	2.71	3.26	8.76	1	High	High	High	High	High	High	High	High	High	High	High	High	389.8	480.3	468.5	345.4	364.5	356.3	314.2	307.6	327.8	382.2	362.7	429.3	1	272.7
High	Master Protein	Q5AMH1	Associated with spindles and kinetochores protein 1 OS=Candida albicans (strain SC5314 / ATCC MYA-2876) OX=237561 GN=ASK1 PE=3 SV=1	1	5	0.0994335	0.0535958	0.0354717	0.284	0.199	0.166	-1.82	-2.33	-2.59	19.8	13.9	11.6	69.8	35.01	50.85	12.32	71.14	1	High	High	High	High	High	High	High	High	High	High	High	High	21.9	10.5	19.8	22.9	13.9	7.8	10.6	11.6	13.5	123.6	21.7	69.8	1	15.3
High	Master Protein	A0A1D8PR99	Protein disulfide-isomerase OS=Candida albicans (strain SC5314 / ATCC MYA-2876) OX=237561 GN=PDI1 PE=3 SV=1	35	230	0.998363	0.0271377	0.0362121	0.995	1.062	1.058	-0.01	0.09	0.08	50858.5	54275.8	54062.6	51108.4	1.73	1.96	1.83	1.86	35	High	High	High	High	High	High	High	High	High	High	High	High	51718.3	49956.6	50858.5	54650.9	54275.8	52659.6	54062.6	54437.4	52574.7	51108.4	51842	49959.9	1	36174.7
High	Master Protein	A0A1D8PDL5	1,3-beta-D-glucan-UDP glucosyltransferase OS=Candida albicans (strain SC5314 / ATCC MYA-2876) OX=237561 GN=GSL1 PE=3 SV=1	2	5	0.681058	0.158005	0.0364761	1.123	0.86	0.738	0.17	-0.22	-0.44	339.2	259.7	223.1	302.2	7.8	9.4	6.75	16.74	1	High	High	High	High	High	High	High	High	High	High	High	High	312.2	365.1	339.2	221	262.8	259.7	211.6	223.1	241.7	302.2	260.3	363	1	218.4
High	Master Protein	Q5ANF0	Zinc-coordinating transcription factor OS=Candida albicans (strain SC5314 / ATCC MYA-2876) OX=237561 GN=SFP1 PE=4 SV=1	1	4	0.999939	0.160148	0.036487	0.941	1.129	1.231	-0.09	0.17	0.3	144.2	172.9	188.6	153.2	6.2	6.52	8.4	5.34	1	High	High	High	High	High	High	High	High	High	High	High	High	143.7	144.2	160	157.5	179	172.9	162.8	188.6	189.4	139.6	153.6	153.2	1	100.5
High	Master Protein	A0A1D8PRG7	B30.2/SPRY domain-containing protein OS=Candida albicans (strain SC5314 / ATCC MYA-2876) OX=237561 GN=orf19.7193 PE=4 SV=1	9	22	0.952634	0.292599	0.0368471	0.991	0.97	0.943	-0.01	-0.04	-0.08	2909.9	2847.8	2768.3	2935.4	2.68	2.24	2.26	2.01	9	High	High	High	High	High	High	High	High	High	High	High	High	2909.9	3040.6	2898.4	2744.3	2858.3	2847.8	2667	2768.3	2779.1	2855.9	2935.4	2970.8	1	2035.4
High	Master Protein	Q59SS7	Origin recognition complex subunit 3 OS=Candida albicans (strain SC5314 / ATCC MYA-2876) OX=237561 GN=ORC3 PE=3 SV=1	3	7	0.543759	0.449745	0.0370076	1.051	0.914	0.816	0.07	-0.13	-0.29	1324.8	1152.1	1028.1	1260.6	7.05	5.52	6.68	8.38	3	High	High	High	High	High	High	High	High	High	High	High	High	1236.6	1423.7	1324.8	1048.8	1152.1	1159.4	1028.1	931.2	1060.5	1260.6	1112.2	1309.6	1	864.9
High	Master Protein	A0A1D8PTH2	Sec39 domain-containing protein OS=Candida albicans (strain SC5314 / ATCC MYA-2876) OX=237561 GN=CAALFM_CR07350WA PE=4 SV=1	2	3	0.165646	0.380819	0.0370267	1.143	0.848	0.721	0.19	-0.24	-0.47	743	551	468.7	650	13.89	2.51	11.41	8.96	2	High	High	High	High	High	High	High	High	High	High	High	High	675.4	884.5	743	551	557.8	531.3	534.9	468.7	427	650	566.9	674.8	1	472.4
High	Master Protein	A0A1D8PQM1	Single-stranded telomeric DNA-binding/mRNA-binding protein OS=Candida albicans (strain SC5314 / ATCC MYA-2876) OX=237561 GN=GBP2 PE=4 SV=1	29	113	0.784131	0.238763	0.03725	1.005	0.965	0.923	0.01	-0.05	-0.12	28429.3	27289.8	26103.4	28290.5	1.22	2.36	2.82	1.98	29	High	High	High	High	High	High	High	High	High	High	High	High	28429.3	28881.2	28197.3	27474.7	27289.8	26289.9	26103.4	27229.8	25827.4	28290.5	28412	27393.3	1	19885
High	Master Protein	A0A1D8PNE9	Uncharacterized protein OS=Candida albicans (strain SC5314 / ATCC MYA-2876) OX=237561 GN=orf19.4247 PE=4 SV=1	1	2	0.324338	0.499848	0.0381833	1.431	0.794	0.744	0.52	-0.33	-0.43	36.9	20.5	19.2	25.8	15.11	13.65	25.48	9.54	1	High	High	High	High	High	High	High	High	High	High	High	High	36.9	40.6	30	25.5	20.5	20.2	12	19.2	19.6	25.7	30.3	25.8	1	25.8
High	Master Protein	Q5A220	Repressor of filamentous growth 1 OS=Candida albicans (strain SC5314 / ATCC MYA-2876) OX=237561 GN=RFG1 PE=2 SV=3	2	3	0.996932	0.878516	0.0385826	0.995	1.029	1.106	-0.01	0.04	0.15	581.7	601.6	646.7	584.6	2.95	5.61	2.35	3.16	2	High	High	High	High	High	High	High	High	High	High	High	High	581.7	591.5	558.4	623.8	601.6	558.2	658.1	628.2	646.7	560.8	596.9	584.6	1	406.9
High	None	A0A1D8PC79	Rfc52p (Fragment) OS=Candida albicans (strain SC5314 / ATCC MYA-2876) OX=237561 GN=RFC52 PE=4 SV=1	3	5	0.966261	0.21086	0.038827	0.987	1.115	1.18	-0.02	0.16	0.24	311.4	351.7	372	315.3	2.8	3.14	12.35	2.27	3	High	High	High	High	High	High	High	High	High	High	High	High	318.9	301.5	311.4	351.7	350.1	370.3	434.8	342.1	372	312.9	315.3	326.5	1	223
Medium	Master Protein	Q59LU6	Triglyceride lipase OS=Candida albicans (strain SC5314 / ATCC MYA-2876) OX=237561 GN=CAALFM_CR02570CA PE=4 SV=1	1	4	0.467369	0.063239	0.0397121	0.962	0.927	0.909	-0.06	-0.11	-0.14	1037	999.5	979.5	1077.8	1.62	3.77	5.52	2.51	1	High	High	High	High	High	High	High	High	High	High	High	High	1058.7	1037	1025.7	999.5	1030.1	955.5	1043	979.5	934.8	1069	1077.8	1120.2	1	740.5
High	Master Protein	A0A1D8PJ17	Histone deacetylase OS=Candida albicans (strain SC5314 / ATCC MYA-2876) OX=237561 GN=HOS2 PE=3 SV=1	2	2	0.357092	0.105976	0.039795	1.056	1.118	1.12	0.08	0.16	0.16	237.6	251.5	252.1	225	5.39	4.51	5.19	2.7	2	High	High	High	High	High	High	High	High	High	High	High	High	255.1	229.7	237.6	258.8	236.7	251.5	270.3	244.4	252.1	219.5	231.6	225	1	178.4
High	Master Protein	Q5A3P4	Tryptophanyl-tRNA synthetase OS=Candida albicans (strain SC5314 / ATCC MYA-2876) OX=237561 GN=WRS1 PE=3 SV=1	24	97	0.743636	0.0673504	0.0398534	1.011	0.962	0.946	0.02	-0.06	-0.08	23010.9	21894.3	21510.9	22750.3	0.15	3.48	1.86	1.49	24	High	High	High	High	High	High	High	High	High	High	High	High	23010.9	22976.4	23043.2	21907.2	21894.3	20605.2	21592	21510.9	20868.7	22222.8	22849.9	22750.3	1	16095.1
High	Master Protein	A0A1D8PH52	Acetyl-CoA acetyltransferase OS=Candida albicans (strain SC5314 / ATCC MYA-2876) OX=237561 GN=ERG10 PE=2 SV=1	25	143	0.588204	0.534844	0.0399697	0.989	1.029	1.071	-0.02	0.04	0.1	28326.6	29458.8	30658.3	28627.2	1.83	0.78	2.95	1.81	25	High	High	High	High	High	High	High	High	High	High	High	High	28491.8	27531.8	28326.6	29458.8	29563.8	29126.6	31056.2	30658.3	29343.3	29283.1	28627.2	28253.6	1	19928.8
Medium	Master Protein	Q5A5N2	DNA-dependent ATPase OS=Candida albicans (strain SC5314 / ATCC MYA-2876) OX=237561 GN=RDH54 PE=4 SV=1	1	3	0.768752	0.323875	0.0402104	1.063	0.906	0.833	0.09	-0.14	-0.26	1790.3	1526	1402.8	1683.7	6.89	4.67	1.1	7.87	1	High	High	High	High	High	High	High	High	High	High	High	High	1585.7	1790.3	1792.1	1426.1	1526	1561.8	1381.1	1402.8	1410.9	1683.7	1500.9	1751.2	1	1109.1
High	Master Protein	A0A1D8PF79	Glutamate decarboxylase OS=Candida albicans (strain SC5314 / ATCC MYA-2876) OX=237561 GN=GAD1 PE=3 SV=1	28	128	0.534971	0.288586	0.0409984	1.022	1.028	1.029	0.03	0.04	0.04	25689.4	25840.7	25865.4	25141.3	0.75	0.84	3.1	0.31	28	High	High	High	High	High	High	High	High	High	High	High	High	25356	25689.8	25689.4	25840.7	25929.4	25518	27199.3	25726.1	25865.4	25155.4	25141.3	25012.8	1	17735.4
High	Master Protein	A0A1D8PD51	Exosome non-catalytic core subunit OS=Candida albicans (strain SC5314 / ATCC MYA-2876) OX=237561 GN=orf19.1026 PE=4 SV=1	7	14	0.721912	0.999999	0.042322	0.965	0.982	1.058	-0.05	-0.03	0.08	1451.9	1477.3	1592.1	1505.1	2.04	3.33	2.59	1.91	7	High	High	High	High	High	High	High	High	High	High	High	High	1494.4	1451.9	1437	1453.3	1549	1477.3	1643.7	1592.1	1561.7	1460.7	1505.1	1514	1	1045.3
High	Master Protein	A0A1D8PPR4	Yhm1p OS=Candida albicans (strain SC5314 / ATCC MYA-2876) OX=237561 GN=YHM1 PE=3 SV=1	18	62	0.870678	0.98884	0.0428637	0.975	1	1.077	-0.04	0	0.11	12767.4	13092.2	14100.8	13095.3	1.79	5.22	1.31	1.01	18	High	High	High	High	High	High	High	High	High	High	High	High	13082	12767.4	12634.9	13092.2	13884.9	12516.1	14100.8	14303.7	13933.9	13095.3	12910.6	13166.6	1	9150.3
High	Master Protein	Q5A2C6	MICOS complex subunit OS=Candida albicans (strain SC5314 / ATCC MYA-2876) OX=237561 GN=orf19.415 PE=4 SV=1	10	35	0.432406	0.67848	0.0429072	1.026	1.022	1.051	0.04	0.03	0.07	5240.5	5221.1	5366.5	5107.2	0.97	2.4	0.88	1.86	10	High	High	High	High	High	High	High	High	High	High	High	High	5305.5	5205.3	5240.5	5093.1	5343.1	5221.1	5423.3	5366.5	5329.6	5064.1	5107.2	5246.8	1	3711
High	Master Protein	Q5A879	Sphingosine N-acyltransferase OS=Candida albicans (strain SC5314 / ATCC MYA-2876) OX=237561 GN=LAG1 PE=3 SV=1	2	7	0.999423	0.105514	0.0431119	1.004	0.931	0.884	0.01	-0.1	-0.18	436.2	404.3	383.9	434.4	3.27	4.81	3.68	2.66	2	High	High	High	High	High	High	High	High	High	High	High	High	436.2	446	418.1	377.2	404.3	414.3	407.4	381.3	383.9	441.9	419.3	434.4	1	305.1
High	Master Protein	A0A1D8PHY0	Uncharacterized protein OS=Candida albicans (strain SC5314 / ATCC MYA-2876) OX=237561 GN=orf19.1872 PE=4 SV=1	9	38	0.908919	0.637848	0.0432561	1.001	0.999	0.953	0	0	-0.07	7791.4	7772.9	7410.9	7780.4	2.1	2.27	0.91	1.46	9	High	High	High	High	High	High	High	High	High	High	High	High	7791.1	8077.8	7791.4	7476.1	7781.9	7772.9	7405.6	7525.4	7410.9	7780.4	7716.3	7937.4	1	5449.5
High	Master Protein	Q59YL9	Pre-rRNA-processing protein ESF2 OS=Candida albicans (strain SC5314 / ATCC MYA-2876) OX=237561 GN=ESF2 PE=3 SV=2	6	14	0.969221	0.132199	0.04334	0.981	0.905	0.861	-0.03	-0.14	-0.22	2740.7	2527.8	2405.2	2794	2.89	6.08	5.26	6.94	6	High	High	High	High	High	High	High	High	High	High	High	High	2740.7	2830.3	2671.7	2645.9	2527.8	2343.6	2296.6	2550	2405.2	2618.3	3007.3	2794	1	1917
High	Master Protein	A0A1D8PJG0	Cytochrome c oxidase subunit VII OS=Candida albicans (strain SC5314 / ATCC MYA-2876) OX=237561 GN=COX7 PE=4 SV=1	3	15	0.762227	0.112822	0.0435081	1.179	0.739	0.775	0.24	-0.44	-0.37	6356.5	3984	4175.3	5389.3	5.55	17.62	16.27	13.55	3	High	High	High	High	High	High	High	High	High	High	High	High	6141.6	6840.3	6356.5	5180.3	3984	3771.3	3268.7	4527.2	4175.3	5389.3	6695.3	5288	1	4295.8
High	Master Protein	Q5A862	Uncharacterized protein OS=Candida albicans (strain SC5314 / ATCC MYA-2876) OX=237561 GN=CAALFM_CR00880WA PE=4 SV=1	1	1	0.847735	0.691778	0.0446551	1.01	1.042	1.101	0.01	0.06	0.14	350.6	361.8	382.2	347.2	5.63	3.63	3.07	0.99	1	High	High	High	High	High	High	High	High	High	High	High	High	378.1	339	350.6	361.8	344.7	370.3	382.2	372	395.5	347.2	343.4	350.2	1	264.4
High	Master Protein	Q5A4J9	Oxidored_FMN domain-containing protein OS=Candida albicans (strain SC5314 / ATCC MYA-2876) OX=237561 GN=orf19.3442 PE=4 SV=1	19	54	0.404441	0.907621	0.0458172	1.019	1	0.969	0.03	0	-0.05	9512.7	9338.3	9050.2	9339.9	1.05	2.33	1.91	0.37	16	High	High	High	High	High	High	High	High	High	High	High	High	9512.7	9484.8	9671.3	9278.8	9338.3	9686.3	9050.2	9068	8762.6	9323.8	9339.9	9389.4	1	6653.7
Low	Master Protein	A0A1D8PU23	MFS domain-containing protein OS=Candida albicans (strain SC5314 / ATCC MYA-2876) OX=237561 GN=CAALFM_CR09830WA PE=4 SV=1	1	3	0.0933012	0.918216	0.0458218	1.255	0.991	0.803	0.33	-0.01	-0.32	342.5	270.5	219.2	272.8	10	5.21	14.39	8.74	1	High	High	High	High	High	High	High	High	High	High	High	High	342.5	401.8	336.6	270.5	258.9	287.1	189.7	219.2	253.2	272.8	272.4	316.1	1	239.5
High	Master Protein	O94150	37S ribosomal protein S9, mitochondrial OS=Candida albicans (strain SC5314 / ATCC MYA-2876) OX=237561 GN=MRPS9 PE=2 SV=1	17	83	0.205929	0.812919	0.0463906	0.976	1.004	1.022	-0.04	0.01	0.03	8248.4	8485.5	8638.9	8451.3	1.43	0.67	1	1.11	17	High	High	High	High	High	High	High	High	High	High	High	High	8362.4	8248.4	8125.9	8412.1	8523.7	8485.5	8576.7	8638.9	8748.2	8470.9	8300.4	8451.3	1	5849.1
High	Master Protein	A0A1D8PJL3	Cytokin_check_N domain-containing protein OS=Candida albicans (strain SC5314 / ATCC MYA-2876) OX=237561 GN=orf19.267 PE=4 SV=1	6	21	0.889209	0.25165	0.0464413	1.067	0.874	0.815	0.09	-0.19	-0.29	3656.2	2994.4	2791.8	3425.1	10.37	4.84	7.17	5.59	5	High	High	High	High	High	High	High	High	High	High	High	High	3169.6	3897.1	3656.2	2888	2994.4	3177	2791.8	2616.5	3018.2	3425.1	3219.3	3600.5	1	2217
High	Master Protein	A0A1D8PK43	Ribosomal 60S subunit protein L18A OS=Candida albicans (strain SC5314 / ATCC MYA-2876) OX=237561 GN=RPL18 PE=3 SV=1	14	176	0.00876978	0.95945	0.0475912	0.93	1.007	1.039	-0.1	0.01	0.06	35570.5	38534.4	39758.8	38253.3	1.64	2.45	2.36	1.41	14	High	High	High	High	High	High	High	High	High	High	High	High	34597.5	35570.5	35630.1	38534.4	39076.7	37247.3	41117.7	39758.8	39304.4	38253.3	38311.7	37356.2	1	24199.4
High	Master Protein	Q59YH1	Glucosamine_iso domain-containing protein OS=Candida albicans (strain SC5314 / ATCC MYA-2876) OX=237561 GN=orf19.1355 PE=3 SV=1	13	51	0.616482	0.119044	0.0476611	0.982	1.048	1.077	-0.03	0.07	0.11	9754.1	10404.7	10697.3	9929.8	1.29	2.3	2.82	1.59	13	High	High	High	High	High	High	High	High	High	High	High	High	9939.3	9698.3	9754.1	10254.6	10404.7	10726.4	10801	10240.3	10697.3	9929.8	10192.4	9903.9	1	6952.1
High	Master Protein	O74711	Peroxisomal targeting signal receptor OS=Candida albicans (strain SC5314 / ATCC MYA-2876) OX=237561 GN=PEX5 PE=3 SV=2	2	2	0.028436	0.0719397	0.0486116	1.151	1.107	1.137	0.2	0.15	0.18	96.7	93	95.5	84.1	6.39	5.71	3.85	4.96	2	High	High	High	High	High	High	High	High	High	High	High	High	96.7	105	92.7	101.6	91.4	93	93.2	95.5	100.5	84.1	79.8	88.1	1	67.6
Medium	None	Q59M48	Ste13p OS=Candida albicans (strain SC5314 / ATCC MYA-2876) OX=237561 GN=STE13 PE=3 SV=1	1	8	0.907818	0.222573	0.0491541	1.075	0.859	0.802	0.1	-0.22	-0.32	3313.1	2646.2	2472.2	3081.2	11.81	4.55	7.73	5.62	1	High	High	High	High	High	High	High	High	High	High	High	High	2788.1	3524.2	3313.1	2544.2	2646.2	2785.3	2472.2	2290.5	2673.4	3081.2	2878.1	3220.2	1	1950.1
High	Master Protein	A0A1D8PF08	Ribosomal 60S subunit protein L2A OS=Candida albicans (strain SC5314 / ATCC MYA-2876) OX=237561 GN=RPL2 PE=4 SV=1	25	266	0.0555199	0.948503	0.049966	0.93	0.994	1.073	-0.1	-0.01	0.1	63579.2	67952	73334.9	68363.9	2.91	1.47	3.71	3.87	25	High	High	High	High	High	High	High	High	High	High	High	High	65217.9	61529.7	63579.2	67952	68661.3	66693.3	77740.6	73334.9	72642.4	71545.9	68363.9	66267.8	1	45617
High	Master Protein	Q5AG89	Thioredoxin reductase OS=Candida albicans (strain SC5314 / ATCC MYA-2876) OX=237561 GN=TRR1 PE=3 SV=1	14	95	0.952535	0.0717419	0.0501058	0.975	1.065	1.108	-0.04	0.09	0.15	13662.1	14931.3	15535.7	14015.3	2.41	5.38	3.29	0.9	14	High	High	High	High	High	High	High	High	High	High	High	High	14148.3	13515	13662.1	14504.3	14931.3	16083.5	15585.9	14692.2	15535.7	14070	14015.3	13829.4	1	9896.1
High	Master Protein	Q5A6S7	Ribosome-recycling factor, mitochondrial OS=Candida albicans (strain SC5314 / ATCC MYA-2876) OX=237561 GN=CAALFM_CR03950WA PE=3 SV=1	8	15	0.786731	0.0694912	0.0502858	0.977	0.928	0.931	-0.03	-0.11	-0.1	3457.5	3283	3295	3537.4	3.08	1.66	4.24	3.08	8	High	High	High	High	High	High	High	High	High	High	High	High	3457.5	3601.2	3391.7	3368.3	3283	3265.9	3145.2	3423.9	3295	3690.1	3537.4	3477.3	1	2418.4
High	Master Protein	A0A1D8PHC9	Aspartate transaminase OS=Candida albicans (strain SC5314 / ATCC MYA-2876) OX=237561 GN=AAT1 PE=3 SV=1	35	144	0.996915	0.0298827	0.0510975	0.988	1.054	1.046	-0.02	0.08	0.06	31845.4	33962.5	33697.7	32220.9	0.31	2.14	1.74	2.44	34	High	High	High	High	High	High	High	High	High	High	High	High	31712.5	31845.4	31905.4	32886.6	33962.5	34256.6	33967.4	33697.7	32847.4	32220.9	31039.4	32512.8	1	22181.5
Medium	Master Protein	A0A1D8PQ05	Ribonuclease P protein subunit OS=Candida albicans (strain SC5314 / ATCC MYA-2876) OX=237561 GN=POP4 PE=3 SV=1	1	2	0.99591	0.348828	0.0515111	0.982	0.899	0.732	-0.03	-0.15	-0.45	603.9	552.4	450.1	614.7	1.62	14.75	20.74	2.84	1	High	High	High	High	High	High	High	High	High	High	High	High	598.2	617.3	603.9	552.4	568.1	429	538.3	450.1	352.9	607.7	641.1	614.7	1	418.4
High	Master Protein	Q5AL11	Amino acid transporter OS=Candida albicans (strain SC5314 / ATCC MYA-2876) OX=237561 GN=AGC1 PE=3 SV=1	26	52	0.594639	0.0959208	0.052292	1.028	0.977	0.978	0.04	-0.03	-0.03	9827.7	9340.2	9348.3	9558.8	1.62	0.33	1.58	1.16	26	High	High	High	High	High	High	High	High	High	High	High	High	9827.7	9833.3	9558	9340.2	9366	9304	9408.3	9348.3	9130	9531.6	9558.8	9736.1	1	6874
High	Master Protein	Q96W54	40S ribosomal protein S22-A OS=Candida albicans (strain SC5314 / ATCC MYA-2876) OX=237561 GN=RPS22A PE=3 SV=3	11	151	0.368749	0.0771151	0.052505	1.098	0.913	0.935	0.14	-0.13	-0.1	26097.8	21691.5	22220.7	23757.7	3.66	3.81	3.13	5.47	11	High	High	High	High	High	High	High	High	High	High	High	High	24727.6	26534.5	26097.8	23064.4	21691.5	21535.6	21107.3	22220.7	22354.2	23419.8	25875.9	23757.7	1	17295.8
High	Master Protein	A0A1D8PG18	tRNA threonylcarbamoyladenosine dehydratase OS=Candida albicans (strain SC5314 / ATCC MYA-2876) OX=237561 GN=HMA1 PE=4 SV=1	12	33	0.999989	0.0321312	0.0525794	0.991	0.948	0.949	-0.01	-0.08	-0.08	8323	7961	7967.5	8396.1	1.89	2.86	1.46	1.22	12	High	High	High	High	High	High	High	High	High	High	High	High	8199.4	8513	8323	8060.3	7961	7630.1	8016.4	7967.5	7796.7	8222.6	8402.6	8396.1	1	5735.1
High	Master Protein	A0A1D8PRH4	Uncharacterized protein OS=Candida albicans (strain SC5314 / ATCC MYA-2876) OX=237561 GN=orf19.7194 PE=4 SV=1	4	9	0.0323436	0.869854	0.0527913	1.085	0.988	0.912	0.12	-0.02	-0.13	2425.1	2206.8	2038.6	2234.4	0.9	1.3	4.98	2.13	4	High	High	High	High	High	High	High	High	High	High	High	High	2443.8	2400.4	2425.1	2166	2221.3	2206.8	2007.6	2200.6	2038.6	2234.4	2190.2	2285.5	1	1709.3
High	Master Protein	A0A1D8PPK1	Ebp1p OS=Candida albicans (strain SC5314 / ATCC MYA-2876) OX=237561 GN=EBP1 PE=4 SV=1	27	130	0.991029	0.286615	0.0528652	0.973	0.935	0.902	-0.04	-0.1	-0.15	30902.9	29695.8	28655.5	31758.3	2.2	4.76	2.99	1.67	20	High	High	High	High	High	High	High	High	High	High	High	High	30853.9	32071.1	30902.9	31569.5	29695.8	28766.9	28655.5	30077.1	28496.9	31853.5	30899	31758.3	1	21580.9
High	Master Protein	A0A1D8PIF6	Sulfite reductase subunit alpha OS=Candida albicans (strain SC5314 / ATCC MYA-2876) OX=237561 GN=MET10 PE=3 SV=1	28	67	0.342366	0.0969696	0.0529093	1.01	1.029	1.029	0.01	0.04	0.04	10551.8	10745.5	10741.6	10443.6	1.17	1.13	0.92	0.97	28	High	High	High	High	High	High	High	High	High	High	High	High	10551.7	10766.5	10551.8	10745.5	10573.7	10808.5	10741.6	10653.8	10850.3	10369.8	10443.6	10569.6	1	7380.4
High	Master Protein	Q5A5V6	Pyruvate dehydrogenase E1 component subunit beta OS=Candida albicans (strain SC5314 / ATCC MYA-2876) OX=237561 GN=PDB1 PE=4 SV=1	18	208	0.401014	0.122274	0.0535331	0.948	1.068	1.102	-0.08	0.1	0.14	22250.8	25081.9	25868.6	23478.8	4.66	5.23	2.31	2.82	18	High	High	High	High	High	High	High	High	High	High	High	High	23307.2	21232.3	22250.8	24431.6	25081.9	26997.5	25868.6	25426.4	26612	23478.8	24129.6	22805.8	1	16302.4
High	Master Protein	A0A1D8PGS5	Isocitrate dehydrogenase [NAD] subunit, mitochondrial OS=Candida albicans (strain SC5314 / ATCC MYA-2876) OX=237561 GN=IDH2 PE=3 SV=1	26	263	0.029949	0.42578	0.0538022	0.943	1.051	1.067	-0.09	0.07	0.09	40821.7	45519.6	46232.1	43312	1.92	2.4	1.72	2.2	26	High	High	High	High	High	High	High	High	High	High	High	High	42114.3	40677.2	40821.7	43744.3	45697.7	45519.6	45352.7	46232.1	46936.7	44882.9	43312	43132.4	1	29457.1
High	Master Protein	A0A1D8PQE7	Uncharacterized protein OS=Candida albicans (strain SC5314 / ATCC MYA-2876) OX=237561 GN=orf19.2128 PE=4 SV=1	4	8	0.999214	0.0535734	0.0544808	1.007	1.097	1.081	0.01	0.13	0.11	602.8	656.6	647.3	598.6	2.19	3.31	5.21	2.31	4	High	High	High	High	High	High	High	High	High	High	High	High	610.7	602.8	585	636.5	656.6	680	647.3	630	696.1	598.6	589.4	616.8	1	427.1
High	Master Protein	A0A1D8PHU1	cAMP-dependent protein kinase catalytic subunit OS=Candida albicans (strain SC5314 / ATCC MYA-2876) OX=237561 GN=TPK2 PE=3 SV=1	2	5	0.267964	0.374503	0.055548	1.055	0.914	0.829	0.08	-0.13	-0.27	3085	2672.2	2422.9	2924.1	5.77	3.81	7.44	6.35	1	High	High	High	High	High	High	High	High	High	High	High	High	2996	3345.1	3085	2503.4	2672.2	2680	2640.2	2422.9	2278.5	2924.1	2644.9	2984.5	1	2095.6
High	Master Protein	A0A1D8PQN8	Phosphoinositide 5-phosphatase OS=Candida albicans (strain SC5314 / ATCC MYA-2876) OX=237561 GN=orf19.7052 PE=3 SV=1	5	6	0.953487	0.353593	0.0560612	1.05	1.056	1.115	0.07	0.08	0.16	221.1	222.3	234.8	210.6	5.13	4.67	3.18	4.21	5	High	High	High	High	High	High	High	High	High	High	High	High	202.4	221.9	221.1	236.5	222.3	216	244	229.1	234.8	210.6	220.3	202.6	1	141.6
High	Master Protein	A0A1D8PDI3	NADH dehydrogenase [ubiquinone] 1 beta subcomplex subunit 7 OS=Candida albicans (strain SC5314 / ATCC MYA-2876) OX=237561 GN=orf19.446.2 PE=3 SV=1	4	14	0.833577	0.994724	0.0574714	1.037	0.991	0.906	0.05	-0.01	-0.14	1561.7	1493.4	1364.2	1506.3	6.74	1.47	5.76	2.55	4	High	High	High	High	High	High	High	High	High	High	High	High	1443.6	1652.3	1561.7	1493.4	1462.7	1504.9	1245.7	1364.2	1389.6	1460.4	1506.3	1536.5	1	1009.7
High	Master Protein	A0A1D8PHU6	Putative phosphoric monoester hydrolase OS=Candida albicans (strain SC5314 / ATCC MYA-2876) OX=237561 GN=orf19.2269 PE=4 SV=1	9	32	0.999994	0.99943	0.0577233	1.008	1.001	0.929	0.01	0	-0.11	6501.7	6452	5989.4	6447.7	1.88	1.73	3.59	0.57	9	High	High	High	High	High	High	High	High	High	High	High	High	6311	6536.5	6501.7	6452	6361.4	6583.6	6356.1	5964.5	5989.4	6417.3	6447.7	6490.5	1	4414.2
High	Master Protein	A0A1D8PP45	Uncharacterized protein OS=Candida albicans (strain SC5314 / ATCC MYA-2876) OX=237561 GN=MSS2 PE=4 SV=1	1	1	0.998707	0.0305491	0.0580452	0.985	0.888	0.912	-0.02	-0.17	-0.13	92.2	83.2	85.4	93.6	2.85	2.56	6.8	2.53	1	High	High	High	High	High	High	High	High	High	High	High	High	92.1	92.2	96.8	80.4	84.5	83.2	85.4	89	77.8	93.6	90.7	95.4	1	64.4
High	Master Protein	A0A1D8PNJ4	Uncharacterized protein OS=Candida albicans (strain SC5314 / ATCC MYA-2876) OX=237561 GN=orf19.4307 PE=4 SV=1	2	5	0.999362	0.99979	0.0582688	0.984	0.983	0.912	-0.02	-0.03	-0.13	985.2	984	913.1	1001.4	0.88	2.01	4.07	3.48	2	High	High	High	High	High	High	High	High	High	High	High	High	981.3	985.2	997.8	984	1011	972.2	962.6	913.1	889	1001.4	952.8	1019.5	1	686.4
High	Master Protein	A0A1D8PEC5	Mediator of RNA polymerase II transcription subunit 15 OS=Candida albicans (strain SC5314 / ATCC MYA-2876) OX=237561 GN=MED15 PE=3 SV=1	1	2	0.20619	0.0656638	0.0586063	1.125	1.211	1.176	0.17	0.28	0.23	240.6	258.9	251.4	213.8	0.81	7.73	5.79	7.39	1	High	High	High	High	High	High	High	High	High	High	High	High	238.3	242.2	240.6	228.9	258.9	265.2	251.4	266.5	237.4	213.8	201	232.7	1	166.7
Medium	None	Q5AD02	Allantoicase OS=Candida albicans (strain SC5314 / ATCC MYA-2876) OX=237561 GN=orf19.2065 PE=3 SV=1	1	1	0.995273	0.736119	0.0587356	1.032	1.206	1.465	0.05	0.27	0.55	475	555	674.7	460.4	13.94	7.85	10.43	10.79	1	High	High	High	High	High	High	High	High	High	High	High	High	581.5	449.6	475	567	555	488.7	693.4	674.7	568.5	460.4	459.7	551.7	1	406.7
High	Master Protein	Q59QC1	Mitochondrial 54S ribosomal protein YmL28 OS=Candida albicans (strain SC5314 / ATCC MYA-2876) OX=237561 GN=orf19.397 PE=3 SV=1	10	30	0.895163	0.967172	0.0602916	0.991	0.996	1.047	-0.01	-0.01	0.07	4462.6	4485.7	4714.8	4502.2	2.42	2.62	0.46	0.71	10	High	High	High	High	High	High	High	High	High	High	High	High	4550.7	4462.6	4336.4	4485.7	4661.3	4434.8	4714.8	4723.1	4682.5	4502.2	4461.1	4524	1	3183
High	Master Protein	Q5ABD5	Complex1_LYR_dom domain-containing protein OS=Candida albicans (strain SC5314 / ATCC MYA-2876) OX=237561 GN=orf19.6035 PE=3 SV=1	8	55	0.0511383	0.461523	0.0609798	0.91	1.037	1.062	-0.14	0.05	0.09	10149.4	11568.1	11843	11154.7	4.13	2.27	2.73	2.2	8	High	High	High	High	High	High	High	High	High	High	High	High	10804.7	10005	10149.4	11272.8	11568.1	11795.2	11843	12346	11732.7	11362	11154.7	10873.2	1	7557.4
High	Master Protein	Q5AI20	Fe-S cluster-binding ribosome biosynthesis protein OS=Candida albicans (strain SC5314 / ATCC MYA-2876) OX=237561 GN=RLI1 PE=4 SV=1	39	192	0.986547	0.0254824	0.0618757	1.005	0.975	0.983	0.01	-0.04	-0.02	32683.6	31701.2	31986.2	32525.3	1.46	0.89	1.25	1.26	39	High	High	High	High	High	High	High	High	High	High	High	High	32515.6	33415.6	32683.6	31763.8	31701.2	31250.7	31317.4	32020	31986.2	32525.3	33238.5	32522.2	1	22743.2
High	Master Protein	A0A1D8PSW9	Mitochondrial 54S ribosomal protein YmL44 OS=Candida albicans (strain SC5314 / ATCC MYA-2876) OX=237561 GN=CAALFM_CR05150WA PE=3 SV=1	6	17	0.918311	0.773244	0.0630546	1.018	1.025	1.047	0.03	0.04	0.07	1704.5	1717.6	1754.4	1675	0.62	0.1	3.06	2.96	6	High	High	High	High	High	High	High	High	High	High	High	High	1704.5	1718.9	1698.5	1715.2	1718.6	1717.6	1744.8	1754.4	1843.7	1647.6	1675	1744.4	1	1192.2
High	Master Protein	A0A1D8PF90	Uncharacterized protein OS=Candida albicans (strain SC5314 / ATCC MYA-2876) OX=237561 GN=orf19.5281 PE=4 SV=1	88	362	0.433278	0.500903	0.0632755	1.013	1.015	1.017	0.02	0.02	0.02	75739.6	75862.2	76012.2	74771.8	0.67	0.35	2.08	0.37	87	High	High	High	High	High	High	High	High	High	High	High	High	75523.2	75739.6	76496.8	75546.3	76072.9	75862.2	78776	76009.1	76012.2	74771.8	74582.3	75125.6	1	52825.2
High	Master Protein	A0A1D8PFU8	Uncharacterized protein OS=Candida albicans (strain SC5314 / ATCC MYA-2876) OX=237561 GN=orf19.7215.3 PE=3 SV=1	7	55	0.853877	0.184112	0.0634179	1.027	1.062	1.104	0.04	0.09	0.14	13050.7	13497.4	14027.3	12704.5	1.12	3.24	7.21	1.44	7	High	High	High	High	High	High	High	High	High	High	High	High	13166	13050.7	12875.8	13368.7	13497.4	14193.4	13056.8	14027.3	15082.8	12868.6	12502.6	12704.5	1	9209.1
High	Master Protein	Q5ADP7	Fesur1p OS=Candida albicans (strain SC5314 / ATCC MYA-2876) OX=237561 GN=FESUR1 PE=3 SV=1	7	35	0.835965	0.740197	0.0637228	0.983	1.021	1.047	-0.02	0.03	0.07	5850.9	6077.5	6231.4	5953.1	1.84	3.23	0.49	0.68	7	High	High	High	High	High	High	High	High	High	High	High	High	5997.9	5850.9	5786.5	6235.2	5846.4	6077.5	6231.4	6219.9	6278	5915.4	5996.6	5953.1	1	4195.2
High	Master Protein	A0A1D8PJA6	NAD(P)-bd_dom domain-containing protein OS=Candida albicans (strain SC5314 / ATCC MYA-2876) OX=237561 GN=orf19.1682 PE=4 SV=1	19	108	0.0324876	0.496123	0.0637327	0.94	1.014	1.051	-0.09	0.02	0.07	18264.9	19706.1	20424	19428.5	2.22	1.55	2	0.52	19	High	High	High	High	High	High	High	High	High	High	High	High	18922.7	18169.1	18264.9	19507.7	20111	19706.1	19743.6	20424	20463.7	19428.5	19435.2	19256.2	1	13235.6
High	Master Protein	A0A1D8PE70	AP-2 complex subunit alpha OS=Candida albicans (strain SC5314 / ATCC MYA-2876) OX=237561 GN=orf19.2786 PE=3 SV=1	2	3	0.636266	0.510789	0.0638363	1.031	1.03	1.132	0.04	0.04	0.18	372.6	372.4	409.3	361.6	3.71	4.04	5.68	4.19	2	High	High	High	High	High	High	High	High	High	High	High	High	388.3	372.6	360.7	372.4	364.7	394.1	409.3	374	416.5	370.2	341.1	361.6	1	271.6
High	Master Protein	Q59K70	Hydrolase_4 domain-containing protein OS=Candida albicans (strain SC5314 / ATCC MYA-2876) OX=237561 GN=orf19.1433 PE=4 SV=1	4	8	0.277845	0.39912	0.064378	1.045	0.943	0.888	0.06	-0.09	-0.17	349.4	315.1	296.9	334.3	4.03	5.35	3.05	5.85	4	High	High	High	High	High	High	High	High	High	High	High	High	349.4	344.9	371.7	321.5	290.2	315.1	282.7	299.2	296.9	308.4	334.3	346.1	1	244.4
High	Master Protein	Q5ALL8	FACT complex subunit POB3 OS=Candida albicans (strain SC5314 / ATCC MYA-2876) OX=237561 GN=POB3 PE=3 SV=1	14	41	0.648611	0.184887	0.0645548	0.981	1.021	1.026	-0.03	0.03	0.04	7948.1	8266.5	8310.9	8100.1	1.25	1.92	0.55	1.23	14	High	High	High	High	High	High	High	High	High	High	High	High	8051.9	7853	7948.1	8092.6	8266.5	8408.2	8310.9	8372.7	8284.1	8100.1	7940.6	8122.6	1	5632
High	Master Protein	A0A1D8PTV0	Proteasome regulatory particle lid subunit OS=Candida albicans (strain SC5314 / ATCC MYA-2876) OX=237561 GN=RPN7 PE=4 SV=1	24	82	0.30733	0.0668576	0.0645746	1.018	0.971	0.96	0.03	-0.04	-0.06	14556	13873.8	13726.5	14295.2	0.34	0.42	1.85	1.43	23	High	High	High	High	High	High	High	High	High	High	High	High	14491.6	14587.9	14556	13925.6	13873.8	13809.2	14163.3	13713.2	13726.5	14071.5	14295.2	14478.5	1	10136.2
High	Master Protein	A0A1D8PHY7	AB hydrolase-1 domain-containing protein OS=Candida albicans (strain SC5314 / ATCC MYA-2876) OX=237561 GN=orf19.1860.1 PE=3 SV=1	14	31	0.202155	0.616552	0.0648962	1.064	0.962	0.891	0.09	-0.06	-0.17	5998.5	5421.2	5024.5	5636.5	6.21	3.13	4.18	1.89	14	High	High	High	High	High	High	High	High	High	High	High	High	6465.3	5998.5	5720.4	5537	5421.2	5204.3	4893	5308.4	5024.5	5505.3	5636.5	5715.4	1	4522.2
High	Master Protein	Q5AF03	Glyoxalase 3 OS=Candida albicans (strain SC5314 / ATCC MYA-2876) OX=237561 GN=GLX3 PE=1 SV=1	20	168	0.871048	0.0988199	0.0649108	0.968	1.102	1.133	-0.05	0.14	0.18	24705.5	28127	28926.2	25526.1	4.25	3.22	7.86	1.1	20	High	High	High	High	High	High	High	High	High	High	High	High	25647.9	23559.2	24705.5	27392.8	28127	29200.6	26235.1	28926.2	30706.4	25526.1	25533.6	25045.1	1	17939.6
High	Master Protein	A0A1D8PHP8	Putative ammonium permease OS=Candida albicans (strain SC5314 / ATCC MYA-2876) OX=237561 GN=FRP3 PE=3 SV=1	3	14	0.585651	0.86533	0.0658318	1.028	1.032	1.084	0.04	0.05	0.12	1891.5	1899.7	1995.9	1840.6	0.97	2.65	2.58	4.83	3	High	High	High	High	High	High	High	High	High	High	High	High	1887.2	1921.2	1891.5	1899.7	1907.5	1817.7	1995.9	2028.1	1927.7	1750.5	1840.6	1928.4	1	1320
High	Master Protein	A0A1D8PM81	MICOS complex subunit MIC10 OS=Candida albicans (strain SC5314 / ATCC MYA-2876) OX=237561 GN=orf19.3782.2 PE=3 SV=1	3	9	0.244459	0.416012	0.0660487	1.051	0.966	0.948	0.07	-0.05	-0.08	1347	1238.3	1216.1	1282.2	3.8	1.58	1.89	1.73	3	High	High	High	High	High	High	High	High	High	High	High	High	1278	1376.8	1347	1219.9	1238.3	1259	1216.1	1221.3	1179.5	1256.7	1282.2	1300.9	1	893.9
High	Master Protein	Q5A8J1	MoCF_biosynth domain-containing protein OS=Candida albicans (strain SC5314 / ATCC MYA-2876) OX=237561 GN=orf19.5757 PE=4 SV=1	3	8	0.945401	0.50084	0.0663033	1.008	0.957	0.904	0.01	-0.06	-0.15	1550.1	1471.2	1390.6	1538	3.18	3.21	4.34	3.05	3	High	High	High	High	High	High	High	High	High	High	High	High	1484.7	1580.3	1550.1	1399.7	1471.2	1487.3	1330.1	1450.8	1390.6	1461.4	1538	1544.3	1	1038.5
High	Master Protein	A0A1D8PDT9	PRA1 family protein OS=Candida albicans (strain SC5314 / ATCC MYA-2876) OX=237561 GN=orf19.6264.3 PE=3 SV=1	4	19	0.995759	0.456806	0.0676445	1.021	1.051	1.082	0.03	0.07	0.11	1049.9	1080.4	1112.6	1028.2	3.43	5.48	2.41	1.98	4	High	High	High	High	High	High	High	High	High	High	High	High	1049.9	1054.6	991.1	1128.7	1080.4	1011.6	1112.6	1149	1096.3	1003.1	1028.2	1043.3	1	734.4
High	Master Protein	A0A1D8PQL3	tRNA(His) guanylyltransferase OS=Candida albicans (strain SC5314 / ATCC MYA-2876) OX=237561 GN=THG1 PE=3 SV=1	3	5	0.855577	0.692655	0.0678424	1.003	1.021	1.121	0	0.03	0.17	355.9	362.4	398	354.9	3.47	6.71	5.14	3.9	2	High	High	High	High	High	High	High	High	High	High	High	High	355.9	352.9	375.9	344.4	362.4	393.1	398	373.8	414.2	334.8	354.9	360.8	1	248.9
High	Master Protein	Q59PR3	ATP-dependent RNA helicase DBP8 OS=Candida albicans (strain SC5314 / ATCC MYA-2876) OX=237561 GN=DBP8 PE=3 SV=1	10	26	0.568007	0.149796	0.0680612	1.015	0.965	0.952	0.02	-0.05	-0.07	1455.7	1383.2	1364.2	1433.5	1.24	0.33	2.4	2.27	9	High	High	High	High	High	High	High	High	High	High	High	High	1481.6	1455.7	1446.9	1380.4	1383.2	1389.3	1364.2	1409.9	1346.1	1401.3	1466.3	1433.5	1	1036.3
Medium	Master Protein	Q59TP1	Cell wall protein RTB1 OS=Candida albicans (strain SC5314 / ATCC MYA-2876) OX=237561 GN=RBT1 PE=1 SV=2	1	1	0.490464	0.412658	0.0690977	1.107	0.798	0.771	0.15	-0.33	-0.38	451.5	325.5	314.2	407.8	15.1	9.31	8.59	7.2	1	High	High	High	High	High	High	High	High	High	High	High	High	380.1	515.7	451.5	325.5	320.7	378	274.4	314.2	323.5	410.4	360.2	407.8	1	265.9
High	Master Protein	A0A1D8PGF0	Lysophospholipase OS=Candida albicans (strain SC5314 / ATCC MYA-2876) OX=237561 GN=PLB4.5 PE=3 SV=1	3	4	0.928786	0.343457	0.0698246	1	1.035	1.039	0	0.05	0.06	693.2	717.2	720.2	693.2	1.19	1.06	3.89	2.32	3	High	High	High	High	High	High	High	High	High	High	High	High	690.7	693.2	706.2	717.2	717.6	704.4	761.9	707.6	720.2	670.9	693.2	701.9	1	483.1
High	Master Protein	Q5A8X6	Succinate--CoA ligase [ADP-forming] subunit alpha, mitochondrial OS=Candida albicans (strain SC5314 / ATCC MYA-2876) OX=237561 GN=LSC1 PE=3 SV=1	14	63	0.837011	0.999995	0.0712576	1.015	0.992	1.036	0.02	-0.01	0.05	11294.7	11041	11532.6	11132.4	1.01	3.05	0.89	0.85	14	High	High	High	High	High	High	High	High	High	High	High	High	11294.7	11119.1	11331.8	11041	11497.7	10835.9	11532.6	11704.7	11521.3	11204.9	11132.4	11016.9	1	7900.2
High	Master Protein	Q5AL24	Nicotinamide-nucleotide adenylyltransferase OS=Candida albicans (strain SC5314 / ATCC MYA-2876) OX=237561 GN=orf19.4953 PE=4 SV=1	6	13	0.997217	0.269341	0.0729739	0.997	1.043	1.057	0	0.06	0.08	1604.9	1678.6	1701.2	1609	2.19	1	1.87	3.22	6	High	High	High	High	High	High	High	High	High	High	High	High	1604.9	1641.2	1570.9	1678.6	1680.5	1650.8	1701.2	1729.7	1666.2	1609	1561.1	1664.6	1	1122.5
High	Master Protein	Q5AKW2	Myosin 2 OS=Candida albicans (strain SC5314 / ATCC MYA-2876) OX=237561 GN=MYO2 PE=3 SV=1	50	109	0.832854	0.111912	0.0741908	1.022	1.04	1.043	0.03	0.06	0.06	19514.2	19856.5	19908.5	19087.6	1.15	2.7	1.75	1.4	49	High	High	High	High	High	High	High	High	High	High	High	High	19660.9	19220.7	19514.2	19544.2	19856.5	20597.1	19908.5	19854.6	20489.8	19044.9	19087.6	19529.2	1	13751.9
High	Master Protein	A0A1D8PKZ7	Pyrroline-5-carboxylate reductase OS=Candida albicans (strain SC5314 / ATCC MYA-2876) OX=237561 GN=PRO3 PE=3 SV=1	14	47	0.619167	0.243566	0.0746324	0.979	1.027	1.057	-0.03	0.04	0.08	6191.7	6497.6	6682	6323.7	1.4	2.8	1.62	1.44	14	High	High	High	High	High	High	High	High	High	High	High	High	6335.9	6179.1	6191.7	6423.3	6497.6	6772.3	6682	6530.9	6739.9	6286.6	6460.3	6323.7	1	4431.7
High	Master Protein	Q59ZG1	GOLD domain-containing protein OS=Candida albicans (strain SC5314 / ATCC MYA-2876) OX=237561 GN=orf19.3558 PE=3 SV=1	9	23	0.613935	0.689474	0.0762184	1.027	1.014	1.045	0.04	0.02	0.06	4229.3	4173.8	4301.5	4118.1	0.77	2.09	2.92	3.64	9	High	High	High	High	High	High	High	High	High	High	High	High	4178.9	4229.3	4239.2	4173.8	4303.3	4135.9	4513.1	4283.8	4301.5	4118.1	3953.1	4251.8	1	2922.9
High	Master Protein	Q59SK0	4-nitrophenylphosphatase OS=Candida albicans (strain SC5314 / ATCC MYA-2876) OX=237561 GN=orf19.4172 PE=4 SV=1	6	9	0.979811	0.288228	0.0773204	1.023	1.042	1.12	0.03	0.06	0.16	928.4	945.8	1016.6	907.3	3.79	7.52	2.38	0.17	6	High	High	High	High	High	High	High	High	High	High	High	High	950.2	928.4	882	918	945.8	1056.4	1021.8	977.9	1016.6	907.3	905.9	909.1	1	664.6
High	Master Protein	A0A1D8PFV8	17-beta-hydroxysteroid dehydrogenase-like protein OS=Candida albicans (strain SC5314 / ATCC MYA-2876) OX=237561 GN=orf19.7214 PE=3 SV=1	18	44	0.627775	0.177103	0.0780947	1.021	1.048	1.062	0.03	0.07	0.09	6438.3	6611.8	6699.8	6307.7	1.3	0.72	4.48	2.99	18	High	High	High	High	High	High	High	High	High	High	High	High	6438.3	6378.5	6544.8	6566.3	6611.8	6662.1	7010.6	6699.8	6410.3	6307.7	6076	6447.3	1	4503.3
High	Master Protein	A0A1D8PG81	Hgt7p OS=Candida albicans (strain SC5314 / ATCC MYA-2876) OX=237561 GN=HGT7 PE=3 SV=1	11	118	0.895086	0.23528	0.0785438	1.161	0.774	0.747	0.22	-0.37	-0.42	11093.6	7395.3	7142.1	9557.6	14.32	18.18	3.33	12.52	5	High	High	High	High	High	High	High	High	High	High	High	High	8996.5	11977.8	11093.6	9598.9	7395.3	6874.8	7142.1	7506.8	7051.6	9557.6	11272.2	8865.6	1	6292.7
High	Master Protein	A0A1D8PTX1	Actin-related protein 2 OS=Candida albicans (strain SC5314 / ATCC MYA-2876) OX=237561 GN=ARP2 PE=3 SV=1	17	58	0.998492	0.812625	0.0787107	0.991	0.986	0.961	-0.01	-0.02	-0.06	6975.7	6939.3	6764	7036.3	0.29	2.2	0.71	1.48	16	High	High	High	High	High	High	High	High	High	High	High	High	7009.8	6975.7	6974.1	6773.8	6939.3	7078.2	6764	6733.1	6827.9	6882.2	7036.3	7080	1	4903.1
High	Master Protein	A0A1D8PKB9	Branched-chain-amino-acid aminotransferase OS=Candida albicans (strain SC5314 / ATCC MYA-2876) OX=237561 GN=BAT22 PE=3 SV=1	23	110	0.443751	0.393201	0.0788329	1.017	1.021	1.035	0.02	0.03	0.05	20978.1	21065.2	21364.7	20636.8	0.68	1.16	1.97	1.81	23	High	High	High	High	High	High	High	High	High	High	High	High	20753.6	21019.5	20978.1	21065.2	21103.6	20665.9	21613.3	21364.7	20795.5	20636.8	20104.2	20817.7	1	14516.2
High	Master Protein	A0A1D8PFX8	Rab GDP dissociation inhibitor OS=Candida albicans (strain SC5314 / ATCC MYA-2876) OX=237561 GN=GDI1 PE=3 SV=1	17	54	0.77719	0.0740784	0.0804126	1.026	1.042	1.066	0.04	0.06	0.09	6636.2	6738.3	6893	6468.8	0.53	4.03	1.51	1.49	17	High	High	High	High	High	High	High	High	High	High	High	High	6592.6	6662.6	6636.2	6703.9	6738.3	7200.3	6961	6756.7	6893	6468.8	6448.3	6625.9	1	4611.3
High	Master Protein	Q59NC4	Gly1p OS=Candida albicans (strain SC5314 / ATCC MYA-2876) OX=237561 GN=GLY1 PE=3 SV=1	19	79	0.382557	0.0302582	0.0812732	0.964	1.035	1.035	-0.05	0.05	0.05	11078.2	11896.8	11899.6	11496.7	2.14	2.04	0.85	1.72	18	High	High	High	High	High	High	High	High	High	High	High	High	11387.6	10919.2	11078.2	11827.9	11896.8	12282.5	11970.5	11770.7	11899.6	11534.7	11177.9	11496.7	1	7965.1
High	Master Protein	A0A1D8PJ12	Acylglycerone-phosphate reductase OS=Candida albicans (strain SC5314 / ATCC MYA-2876) OX=237561 GN=AYR1 PE=3 SV=1	4	5	0.611397	0.125705	0.0815793	1.08	0.845	0.884	0.11	-0.24	-0.18	817.4	639.9	669	757.1	6.33	8.29	11.26	8.22	4	High	High	High	High	High	High	High	High	High	High	High	High	812.6	907.6	817.4	699.8	639.9	593.2	549.6	676.2	669	719.8	843.8	757.1	1	568.4
High	Master Protein	Q5A9X7	Arp9p OS=Candida albicans (strain SC5314 / ATCC MYA-2876) OX=237561 GN=ARP9 PE=3 SV=1	16	44	0.337007	0.399083	0.0816667	1.022	0.961	0.941	0.03	-0.06	-0.09	7434.3	6990.6	6841.6	7272.5	0.67	1.9	3.77	2.47	16	High	High	High	High	High	High	High	High	High	High	High	High	7491.3	7392.7	7434.3	7028.7	6990.6	6784	6984.2	6841.6	6488.7	6968.7	7272.5	7278.4	1	5239.9
High	Master Protein	Q59KI4	Chromatin-remodeling ATPase INO80 OS=Candida albicans (strain SC5314 / ATCC MYA-2876) OX=237561 GN=INO80 PE=3 SV=2	7	8	0.205037	0.569541	0.0819185	1.051	0.911	0.838	0.07	-0.13	-0.26	1255.5	1088.3	1000.4	1194.2	5.7	4.16	5.27	5.85	7	High	High	High	High	High	High	High	High	High	High	High	High	1209.8	1351.9	1255.5	1139.7	1049	1088.3	1000.4	1085	984.8	1079.6	1199.3	1194.2	1	846.2
High	Master Protein	A0A1D8PJ20	Proteasome core particle subunit alpha 1 OS=Candida albicans (strain SC5314 / ATCC MYA-2876) OX=237561 GN=SCL1 PE=3 SV=1	15	54	0.981311	0.215376	0.0825328	1.006	0.964	0.938	0.01	-0.05	-0.09	11771.2	11273.2	10969.1	11697.8	1.4	3.32	3.48	2.17	15	High	High	High	High	High	High	High	High	High	High	High	High	11616.5	11946.2	11771.2	11414.7	11273.2	10716	10969.1	11342.7	10580.1	11420.6	11926.6	11697.8	1	8125.3
High	Master Protein	A0A1D8PL36	ENTH domain-containing protein OS=Candida albicans (strain SC5314 / ATCC MYA-2876) OX=237561 GN=orf19.4184 PE=4 SV=1	4	8	0.976203	0.575806	0.0840122	1.024	0.923	0.922	0.03	-0.12	-0.12	1334.2	1203.1	1201.7	1303.1	0.85	6.15	9.86	1.24	4	High	High	High	High	High	High	High	High	High	High	High	High	1317.3	1338.7	1334.2	1203.1	1161.6	1307.8	1009.8	1206.9	1201.7	1303.1	1320.7	1288.5	1	921.4
High	Master Protein	A0A1D8PQR2	Mitochondrial 37S ribosomal protein MRPS16 OS=Candida albicans (strain SC5314 / ATCC MYA-2876) OX=237561 GN=orf19.7012 PE=3 SV=1	7	10	0.999169	0.770074	0.0848165	1.004	1.047	1.077	0.01	0.07	0.11	2352.1	2451.9	2521.7	2342.2	0.74	3.56	3.4	1.57	7	High	High	High	High	High	High	High	High	High	High	High	High	2339.9	2352.1	2374.4	2314	2451.9	2471.7	2420.2	2521.7	2589.7	2339.2	2342.2	2405	1	1636.7
High	Master Protein	Q59X29	Proteasome regulatory particle base subunit OS=Candida albicans (strain SC5314 / ATCC MYA-2876) OX=237561 GN=RPN10 PE=3 SV=1	7	28	0.832413	0.999224	0.0851287	1.015	1.012	0.903	0.02	0.02	-0.15	5438.3	5419.5	4838.8	5356.4	2.55	4.63	3.78	2.62	7	High	High	High	High	High	High	High	High	High	High	High	High	5611	5335.6	5438.3	5419.5	5078.6	5561	4783.8	4838.8	5130	5180.3	5456.6	5356.4	1	3924.6
High	Master Protein	A0A1D8PTF1	Emp46p OS=Candida albicans (strain SC5314 / ATCC MYA-2876) OX=237561 GN=EMP46 PE=4 SV=1	10	16	0.997422	0.353857	0.0862584	1.022	1.086	1.076	0.03	0.12	0.11	927.8	986	976.8	907.6	2.2	4.32	4.08	3.35	9	High	High	High	High	High	High	High	High	High	High	High	High	939.7	927.8	900.1	986	918.7	995	969.6	976.8	1043.3	907.6	893.1	952.2	1	657.3
High	Master Protein	A0A1D8PRN5	Uncharacterized protein OS=Candida albicans (strain SC5314 / ATCC MYA-2876) OX=237561 GN=CAALFM_CR00160CA PE=4 SV=1	3	4	0.607122	0.418869	0.0869721	1.036	1.051	1.085	0.05	0.07	0.12	1007.1	1021.8	1054.2	972.1	0.39	3.56	2.77	3.59	3	High	High	High	High	High	High	High	High	High	High	High	High	1002.4	1007.1	1010.1	976.6	1048	1021.8	1011.6	1066.8	1054.2	972.1	945.2	1014.7	1	701.1
High	Master Protein	Q59XU5	Ras-like protein 1 OS=Candida albicans (strain SC5314 / ATCC MYA-2876) OX=237561 GN=RAS1 PE=3 SV=2	13	89	0.997785	0.892278	0.0876087	1.019	1.022	1.072	0.03	0.03	0.1	9543.4	9571	10041.9	9363.8	1.43	3.93	2.12	2.19	13	High	High	High	High	High	High	High	High	High	High	High	High	9327	9576.3	9543.4	9571	9226.1	9980.1	10226.7	9802.5	10041.9	9295.3	9682.7	9363.8	1	6523.8
High	Master Protein	A0A1D8PLT4	Karyopherin OS=Candida albicans (strain SC5314 / ATCC MYA-2876) OX=237561 GN=MSN5 PE=4 SV=1	10	14	0.251896	0.0414281	0.0880595	0.939	1.147	1.129	-0.09	0.2	0.18	2140.8	2615.1	2574.5	2279.6	2.71	2.17	6.59	5.36	10	High	High	High	High	High	High	High	High	High	High	High	High	2201.1	2140.8	2085.1	2563.8	2677.1	2615.1	2398.7	2574.5	2737.3	2209.8	2279.6	2450.8	1	1539.6
High	Master Protein	A0A1D8PGU4	Delta-aminolevulinic acid dehydratase OS=Candida albicans (strain SC5314 / ATCC MYA-2876) OX=237561 GN=HEM2 PE=3 SV=1	8	24	0.161524	0.419941	0.0882527	1.088	0.916	0.91	0.12	-0.13	-0.14	3725.6	3134.6	3114.8	3423.7	1.69	3.66	6.99	4.03	8	High	High	High	High	High	High	High	High	High	High	High	High	3725.6	3732.9	3621.6	3318.8	3134.6	3103.1	2815.1	3227.9	3114.8	3231.8	3495.7	3423.7	1	2605.9
High	Master Protein	A0A1D8PPC8	Small nuclear ribonucleoprotein E OS=Candida albicans (strain SC5314 / ATCC MYA-2876) OX=237561 GN=orf19.4205.1 PE=3 SV=1	3	5	1	0.184982	0.0882844	1.016	0.953	0.939	0.02	-0.07	-0.09	736.1	690.7	679.9	724.4	3.03	4.64	6.03	3.49	3	High	High	High	High	High	High	High	High	High	High	High	High	760.8	716.1	736.1	703.3	643.5	690.7	621.2	679.9	698.1	724.4	767.5	721.6	1	532.1
High	Master Protein	Q59W33	Glycerol-3-phosphate dehydrogenase [NAD(+)] OS=Candida albicans (strain SC5314 / ATCC MYA-2876) OX=237561 GN=GPD2 PE=3 SV=1	25	161	0.934112	0.13809	0.088495	1.015	1.035	1.054	0.02	0.05	0.08	21313.8	21719.4	22133.2	20994	0.74	3.16	1.84	1.66	24	High	High	High	High	High	High	High	High	High	High	High	High	21313.8	21350.3	21060.4	21363.8	21719.4	22701	22389.6	21594.5	22133.2	20713.8	20994	21406	1	14908
High	Master Protein	A0A1D8PGE2	TFIIIC_delta domain-containing protein OS=Candida albicans (strain SC5314 / ATCC MYA-2876) OX=237561 GN=orf19.1998 PE=4 SV=1	1	1	0.985308	0.195557	0.0886994	0.975	0.847	0.805	-0.04	-0.24	-0.31	254.2	220.9	209.8	260.6	1.29	8.75	5.83	8.47	1	High	High	High	High	High	High	High	High	High	High	High	High	256.3	249.9	254.2	220.9	239	200.5	202.3	226.5	209.8	224.9	262.3	260.6	1	179.3
High	Master Protein	Q5A6R5	Dap1p OS=Candida albicans (strain SC5314 / ATCC MYA-2876) OX=237561 GN=DAP1 PE=4 SV=1	4	18	0.960722	0.167133	0.0891326	1.016	1.074	1.074	0.02	0.1	0.1	1491.4	1577.6	1577.6	1468.3	2.32	3.11	5.42	1.44	4	High	High	High	High	High	High	High	High	High	High	High	High	1531.4	1462.3	1491.4	1577.6	1523.8	1621.7	1689	1577.6	1518.9	1457.9	1498.8	1468.3	1	1071.1
High	Master Protein	Q5A4W7	Fatty acid synthase subunit beta OS=Candida albicans (strain SC5314 / ATCC MYA-2876) OX=237561 GN=FAS1 PE=3 SV=1	120	820	0.748523	0.610274	0.0891434	1.02	1.004	1.041	0.03	0.01	0.06	141379	139206	144299	138589	1.28	2.07	1.34	0.43	120	High	High	High	High	High	High	High	High	High	High	High	High	138302	141471	141379	139023	139206	144170	144299	141068	144502	138589	139420	138262	1	96735.9
High	Master Protein	P0CY31	Ras-related protein SEC4 OS=Candida albicans (strain SC5314 / ATCC MYA-2876) OX=237561 GN=SEC4 PE=1 SV=1	10	35	0.876774	0.224639	0.0904088	0.996	1.029	1.056	-0.01	0.04	0.08	6485.2	6698.4	6872.6	6509.2	2.46	4.72	0.28	2.24	9	High	High	High	High	High	High	High	High	High	High	High	High	6744.5	6448.8	6485.2	6698.4	6506.9	7131.8	6872.6	6865.2	6901.4	6280.8	6547.2	6509.2	1	4717.5
High	Master Protein	Q59ZV4	Kynurenine formamidase OS=Candida albicans (strain SC5314 / ATCC MYA-2876) OX=237561 GN=BNA7 PE=3 SV=1	3	4	0.461216	0.93123	0.0908913	1.033	1.004	0.929	0.05	0.01	-0.11	645.6	627.4	580.8	625	4.43	3.91	1.49	2.64	3	High	High	High	High	High	High	High	High	High	High	High	High	686.1	630	645.6	627.4	589.6	634.5	573	590.4	580.8	611.5	625	644.4	1	479.9
High	Master Protein	A0A1D8PDK7	Uncharacterized protein OS=Candida albicans (strain SC5314 / ATCC MYA-2876) OX=237561 GN=orf19.2485 PE=3 SV=1	20	40	0.365935	0.204999	0.0915524	1.025	1.037	1.045	0.04	0.05	0.06	5287.1	5349.2	5388.5	5157.3	1.61	2.32	0.67	1.35	20	High	High	High	High	High	High	High	High	High	High	High	High	5399.1	5287.1	5231.8	5209	5349.2	5455.8	5337.9	5407	5388.5	5136.6	5266.7	5157.3	1	3776.5
High	Master Protein	Q59TA2	Signal recognition particle subunit OS=Candida albicans (strain SC5314 / ATCC MYA-2876) OX=237561 GN=orf19.4529 PE=4 SV=1	7	11	0.283476	0.780737	0.0916225	1.062	0.991	0.957	0.09	-0.01	-0.06	3350.7	3124.4	3018.6	3153.9	2.39	2.66	4.92	3.49	7	High	High	High	High	High	High	High	High	High	High	High	High	3449.9	3350.7	3290.9	3124.4	3158.5	3001.7	3024.2	3018.6	2771.2	3086.2	3153.9	3303.4	1	2413.1
Medium	Master Protein	Q5A878	Uncharacterized protein OS=Candida albicans (strain SC5314 / ATCC MYA-2876) OX=237561 GN=CAALFM_CR01050CA PE=4 SV=1	1	1	0.991837	0.556016	0.092343	1.034	0.889	0.876	0.05	-0.17	-0.19	176.5	151.7	149.5	170.6	3.98	6.99	14.6	1.83	1	High	High	High	High	High	High	High	High	High	High	High	High	177.8	176.5	165.3	145.2	166.3	151.7	117.1	155.1	149.5	166.3	170.6	172.3	1	124.4
High	Master Protein	A0A1D8PD74	Aldo_ket_red domain-containing protein OS=Candida albicans (strain SC5314 / ATCC MYA-2876) OX=237561 GN=orf19.4476 PE=4 SV=1	21	83	0.996333	0.507318	0.0923601	0.993	1.045	1.048	-0.01	0.06	0.07	1777.5	1870.7	1875.3	1789.8	0.99	4.27	3.34	1.94	6	High	High	High	High	High	High	High	High	High	High	High	High	1807.6	1777.5	1776.7	1753	1902.4	1870.7	1853.9	1875.3	1973	1739.6	1789.8	1805.8	1	1264.4
High	Master Protein	Q5A5B6	Mannosyltransferase OS=Candida albicans (strain SC5314 / ATCC MYA-2876) OX=237561 GN=ECM39 PE=3 SV=1	2	12	0.81828	0.139195	0.092476	0.955	0.925	0.868	-0.07	-0.11	-0.2	4867.4	4714.3	4422.1	5094.5	2.69	5.55	6.38	2.59	2	High	High	High	High	High	High	High	High	High	High	High	High	4766.5	4867.4	5027.6	4714.3	4787.4	4312.5	4889	4355.9	4422.1	5094.5	5153.7	4903.7	1	3334
Low	Master Protein	A0A1D8PCA6	Anaphase-promoting complex subunit 1 OS=Candida albicans (strain SC5314 / ATCC MYA-2876) OX=237561 GN=APC1 PE=3 SV=1	1	2	0.447472	0.460232	0.0929778	1.122	0.855	0.763	0.17	-0.23	-0.39	1383.7	1054.3	940.7	1233.4	14.5	2.33	8.36	7.53	1	High	High	High	High	High	High	High	High	High	High	High	High	1132.4	1516.2	1383.7	1054.3	1073.3	1024.8	1045.7	888.4	940.7	1239.9	1082.2	1233.4	1	792.1
High	Master Protein	A0A1D8PDZ3	Uncharacterized protein OS=Candida albicans (strain SC5314 / ATCC MYA-2876) OX=237561 GN=orf19.6198.1 PE=4 SV=1	2	5	0.624037	0.493092	0.093085	1.053	0.941	0.886	0.07	-0.09	-0.17	837.2	748.4	704.5	795.3	3.84	8.67	5.35	4.19	2	High	High	High	High	High	High	High	High	High	High	High	High	801	837.2	864.8	748.4	788.3	663.8	704.5	714.1	646	749.5	795.3	813.5	1	560.3
High	Master Protein	Q9UVJ4	60S ribosomal protein L10a OS=Candida albicans (strain SC5314 / ATCC MYA-2876) OX=237561 GN=RPL10A PE=3 SV=2	20	300	0.707539	0.563589	0.0933775	0.969	1.009	1.061	-0.05	0.01	0.08	75385.5	78499.8	82526.2	77814.3	1.27	4.12	3.32	3.09	20	High	High	High	High	High	High	High	High	High	High	High	High	75906	74053	75385.5	78499.8	77625.4	83721.7	82526.2	80305.9	85775.4	77814.3	79292.4	74615.9	1	53093
Low	Master Protein	Q5AFP8	Pheromone-processing carboxypeptidase KEX1 OS=Candida albicans (strain SC5314 / ATCC MYA-2876) OX=237561 GN=KEX1 PE=3 SV=1	1	1	0.998247	0.211694	0.0947441	1.003	0.877	0.855	0	-0.19	-0.23	357.6	312.6	304.8	356.5	12.69	7.84	6.58	2.8	1	High	High	High	High	High	High	High	High	High	High	High	High	416.6	357.6	324.9	287.4	336.4	312.6	304.8	316.9	278.3	372	356.5	353	1	291.4
High	Master Protein	Q5ABB1	Dithiol glutaredoxin OS=Candida albicans (strain SC5314 / ATCC MYA-2876) OX=237561 GN=TTR1 PE=4 SV=1	7	34	0.489147	0.43767	0.0947773	1.08	0.898	0.866	0.11	-0.16	-0.21	14819.9	12324.7	11887.2	13724.8	2.31	10.39	6.58	1.98	7	High	High	High	High	High	High	High	High	High	High	High	High	14576.6	15255.1	14819.9	14267.2	12324.7	11730.7	11293.5	12859.4	11887.2	14104.7	13724.8	13573.2	1	10195.7
High	Master Protein	Q5AIB3	Protein transport protein BOS1 OS=Candida albicans (strain SC5314 / ATCC MYA-2876) OX=237561 GN=orf19.2940 PE=3 SV=1	3	5	0.35214	0.888718	0.0967737	1.035	0.966	0.926	0.05	-0.05	-0.11	1156	1079	1034.8	1117.2	0.69	2.99	3.29	3.79	3	High	High	High	High	High	High	High	High	High	High	High	High	1151.3	1166.9	1156	1079	1128.3	1066.6	1008.2	1076.1	1034.8	1065.3	1117.2	1148.7	1	805.3
High	Master Protein	A0A1D8PT02	Flavodoxin-like fold family protein OS=Candida albicans (strain SC5314 / ATCC MYA-2876) OX=237561 GN=PST3 PE=3 SV=1	11	86	0.766183	0.0907518	0.0974717	1.013	1.03	1.051	0.02	0.04	0.07	15648.8	15918.3	16232.1	15448	0.6	3.37	2.84	2.85	11	High	High	High	High	High	High	High	High	High	High	High	High	15498	15671.9	15648.8	15910.7	15918.3	16861.5	16659.8	15740.5	16232.1	15616.8	15448	14791.3	1	10840.2
High	Master Protein	A0A1D8PH73	Uncharacterized protein OS=Candida albicans (strain SC5314 / ATCC MYA-2876) OX=237561 GN=orf19.4488 PE=4 SV=1	10	21	0.999956	0.261184	0.0978702	0.988	0.932	0.919	-0.02	-0.1	-0.12	5067	4780	4714.6	5131	2.11	4.07	2.63	3.65	9	High	High	High	High	High	High	High	High	High	High	High	High	4920.7	5127.4	5067	4780	4984.9	4595.6	4808.8	4714.6	4563.6	5131	4835	5172.9	1	3441.8
High	Master Protein	A0A1D8PEG3	Kexin OS=Candida albicans (strain SC5314 / ATCC MYA-2876) OX=237561 GN=KEX2 PE=3 SV=1	2	5	0.961708	0.327159	0.0995894	1.061	0.926	0.871	0.08	-0.11	-0.2	691.9	604	568.2	652.3	4.17	8.98	5.71	5.61	2	High	High	High	High	High	High	High	High	High	High	High	High	644.5	694.9	691.9	654.5	604	546.5	568.2	608.8	544	652.3	701.2	628.6	1	450.8
High	Master Protein	Q59M69	ATP-dependent (S)-NAD(P)H-hydrate dehydratase OS=Candida albicans (strain SC5314 / ATCC MYA-2876) OX=237561 GN=CAALFM_C602030CA PE=3 SV=2	8	15	0.189489	0.0416975	0.0997235	1.015	1.044	1.037	0.02	0.06	0.05	1260.6	1297.3	1287.9	1242.1	2.62	1.55	1.12	2.87	7	High	High	High	High	High	High	High	High	High	High	High	High	1316.8	1257.1	1260.6	1325	1297.3	1285.7	1274.2	1287.9	1303.2	1254.6	1188.2	1242.1	1	921
High	Master Protein	A0A1D8PMD7	Uncharacterized protein OS=Candida albicans (strain SC5314 / ATCC MYA-2876) OX=237561 GN=orf19.1247 PE=4 SV=1	1	1	0.252688	0.998878	0.100498	0.922	1.022	1.083	-0.12	0.03	0.11	192.3	213.2	225.8	208.5	2.9	4.13	6.57	3.29	1	High	High	High	High	High	High	High	High	High	High	High	High	200.9	192.3	190.4	213.2	217.6	200.8	248.3	225.8	219.4	216.7	208.5	203	1	140.6
High	Master Protein	A0A1D8PDL7	Uncharacterized protein OS=Candida albicans (strain SC5314 / ATCC MYA-2876) OX=237561 GN=orf19.2489 PE=4 SV=1	53	291	0.991718	0.992508	0.103961	1	0.998	1.035	0	0	0.05	57954.1	57812.1	59967.3	57936.2	0.49	2.43	1.84	1.65	52	High	High	High	High	High	High	High	High	High	High	High	High	57838.8	57954.1	58374.2	57812.1	57597.8	60157.5	59967.3	59859.3	61842	57561.2	59378.1	57936.2	1	40455.7
High	Master Protein	Q5AH92	PITH domain-containing protein OS=Candida albicans (strain SC5314 / ATCC MYA-2876) OX=237561 GN=orf19.904 PE=3 SV=1	5	8	0.998783	0.96572	0.104469	1.007	0.97	0.907	0.01	-0.04	-0.14	882.7	849.9	795.1	876.3	4.49	3.58	5.05	3.19	5	High	High	High	High	High	High	High	High	High	High	High	High	821	892.7	882.7	849.9	876.6	816.1	795.1	820.4	742.5	877.1	829.1	876.3	1	574.3
High	Master Protein	A0A1D8PSR6	Fe2OG dioxygenase domain-containing protein OS=Candida albicans (strain SC5314 / ATCC MYA-2876) OX=237561 GN=CAALFM_CR04500CA PE=3 SV=1	4	7	0.0357697	0.891631	0.104529	1.123	1.043	1.085	0.17	0.06	0.12	611.8	568	591	544.8	2.26	5.37	4.24	3.75	4	High	High	High	High	High	High	High	High	High	High	High	High	611.8	634.2	608.6	594.1	533.6	568	585.8	591	632.5	535.7	544.8	575.2	1	428
High	Master Protein	A0A1D8PIR7	Mtr2p OS=Candida albicans (strain SC5314 / ATCC MYA-2876) OX=237561 GN=MTR2 PE=4 SV=1	3	14	0.34622	0.953963	0.105474	1.049	0.982	0.945	0.07	-0.03	-0.08	2896	2710.2	2609.8	2760.5	2.22	3.91	3.76	1.33	3	High	High	High	High	High	High	High	High	High	High	High	High	2918.2	2896	2798.5	2609.5	2710.2	2821.7	2463	2609.8	2645.7	2760.5	2705.7	2774.8	1	2041.2
High	Master Protein	A0A1D8PRM6	ATP-dependent DNA helicase RRM3 OS=Candida albicans (strain SC5314 / ATCC MYA-2876) OX=237561 GN=RRM3 PE=3 SV=1	3	4	0.0514834	0.594865	0.106492	1.135	0.928	0.862	0.18	-0.11	-0.21	646.4	528.2	490.8	569.4	14	3.04	6.21	2.91	3	High	High	High	High	High	High	High	High	High	High	High	High	646.4	642.4	814.3	528.2	539.6	508.1	448.5	506.3	490.8	553.5	569.4	586.7	1	452.1
High	Master Protein	Q5A6Q0	Uncharacterized protein OS=Candida albicans (strain SC5314 / ATCC MYA-2876) OX=237561 GN=CAALFM_CR04180CA PE=3 SV=1	6	8	0.684725	0.440428	0.107163	1.045	0.945	0.918	0.06	-0.08	-0.12	940.2	850.3	826	899.7	0.72	5.52	4.27	2.7	6	High	High	High	High	High	High	High	High	High	High	High	High	947.5	934	940.2	850.3	830.1	921.2	811.1	826	879.3	890.7	937	899.7	1	662.7
High	Master Protein	Q5AH72	Cytochrome c oxidase assembly protein COX20, mitochondrial OS=Candida albicans (strain SC5314 / ATCC MYA-2876) OX=237561 GN=orf19.6461 PE=3 SV=1	4	8	0.988449	0.0835931	0.107343	1.007	1.087	1.077	0.01	0.12	0.11	1009.4	1089.4	1079.9	1002.7	3	2.69	1.92	3.79	4	High	High	High	High	High	High	High	High	High	High	High	High	1044.1	983.5	1009.4	1062.6	1121.1	1089.4	1109.7	1079.9	1069.4	1002.7	993.2	1064.4	1	730.3
High	Master Protein	Q5AHZ2	Dolichyl-diphosphooligosaccharide--protein glycosyltransferase subunit 2 OS=Candida albicans (strain SC5314 / ATCC MYA-2876) OX=237561 GN=orf19.3060 PE=3 SV=1	8	18	0.944737	0.0769206	0.109828	0.994	1.047	1.079	-0.01	0.07	0.11	2992.4	3153.4	3250.5	3011.2	0.31	4.57	4.66	3.77	8	High	High	High	High	High	High	High	High	High	High	High	High	2991.2	3008	2992.4	3127.4	3153.4	3394.6	3250.5	3032.3	3317.9	3014.1	2819.9	3011.2	1	2092.2
Medium	None	A0A1D8PSB5	Cirt4bp OS=Candida albicans (strain SC5314 / ATCC MYA-2876) OX=237561 GN=CIRT4B PE=4 SV=1	1	4	0.959706	0.315641	0.10987	1.095	0.885	0.876	0.13	-0.18	-0.19	1441.6	1166	1153.6	1317	4.7	9.15	17.36	10.07	1	High	High	High	High	High	High	High	High	High	High	High	High	1382.5	1518.3	1441.6	1265.9	1166	1053.5	874.4	1234	1153.6	1317	1546.3	1293.9	1	967
High	Master Protein	A0A1D8PMZ8	S-adenosylmethionine decarboxylase proenzyme OS=Candida albicans (strain SC5314 / ATCC MYA-2876) OX=237561 GN=SPE2 PE=3 SV=1	2	2	0.510526	0.169596	0.110624	0.95	0.949	0.906	-0.07	-0.08	-0.14	380	379.6	362.5	400.1	3.24	6.64	0.92	3.76	2	High	High	High	High	High	High	High	High	High	High	High	High	391.4	380	366.9	379.6	385.2	340.3	367.8	362.5	361.6	413.2	383.3	400.1	1	273.8
High	Master Protein	Q5AG96	JAB_MPN domain-containing protein OS=Candida albicans (strain SC5314 / ATCC MYA-2876) OX=237561 GN=orf19.4283 PE=4 SV=1	21	113	0.379875	0.850315	0.112272	0.964	1.04	1.074	-0.05	0.06	0.1	16596.6	17902.2	18495.3	17213.6	3.47	2.4	2.61	2.48	21	High	High	High	High	High	High	High	High	High	High	High	High	17434.2	16313.8	16596.6	17902.2	18090.3	17277.3	18495.3	18989.1	18024.9	17213.6	17935.4	17162.4	1	12194.5
High	Master Protein	A0A1D8PNY1	Phospholipid scramblase OS=Candida albicans (strain SC5314 / ATCC MYA-2876) OX=237561 GN=orf19.3929 PE=3 SV=1	2	3	0.954847	0.753364	0.112409	1.004	0.935	0.898	0.01	-0.1	-0.15	578.2	538.3	517.2	575.7	0.36	4.09	7.55	4.12	2	High	High	High	High	High	High	High	High	High	High	High	High	578.2	581.5	577.7	528.9	571.5	538.3	472.6	549.9	517.2	586.7	575.7	541.8	1	404.4
High	Master Protein	Q5ALX3	Transcription elongation factor SPT5 OS=Candida albicans (strain SC5314 / ATCC MYA-2876) OX=237561 GN=SPT5 PE=3 SV=1	40	111	0.0779578	0.683521	0.113024	1.04	0.986	0.972	0.06	-0.02	-0.04	21049.2	19956.7	19674.6	20239.7	1.66	1.16	2.36	1.55	40	High	High	High	High	High	High	High	High	High	High	High	High	21049.2	21478.6	20786.5	19691.4	20151	19956.7	19877.5	19674.6	18998	19949.6	20239.7	20578.8	1	14723
High	Master Protein	A0A1D8PJA9	Uncharacterized protein OS=Candida albicans (strain SC5314 / ATCC MYA-2876) OX=237561 GN=orf19.1658 PE=4 SV=1	10	21	0.97136	0.355638	0.113187	1.003	1.059	1.057	0	0.08	0.08	2913.1	3076.4	3069.9	2904.4	1.84	4.01	3.5	2.29	10	High	High	High	High	High	High	High	High	High	High	High	High	2958.9	2913.1	2852.4	2868.5	3076.4	3078.1	2966.5	3181.4	3069.9	2904.4	2801.9	2925.2	1	2069.6
High	Master Protein	Q5A5S7	Autophagy-related protein 27 OS=Candida albicans (strain SC5314 / ATCC MYA-2876) OX=237561 GN=ATG27 PE=3 SV=1	5	8	0.891491	0.747258	0.113461	1.001	0.969	0.937	0	-0.05	-0.09	791.2	766.3	741	790.6	4.42	4.09	4.81	0.81	5	High	High	High	High	High	High	High	High	High	High	High	High	850.8	791.2	786.7	766.3	798.1	735.4	741	755.8	689.2	785	797.8	790.6	1	595.1
High	Master Protein	Q59RP7	54S ribosomal protein L4, mitochondrial OS=Candida albicans (strain SC5314 / ATCC MYA-2876) OX=237561 GN=MRPL4 PE=3 SV=2	15	61	0.999947	0.287805	0.114312	0.999	0.935	0.917	0	-0.1	-0.13	12430.6	11626	11401.5	12440	1.23	3.49	6.03	2.54	15	High	High	High	High	High	High	High	High	High	High	High	High	12430.6	12541.6	12241	11626	12106.7	11295.5	10774.5	12153.5	11401.5	12048.9	12672	12440	1	8694.6
High	Master Protein	Q59N40	Aspartate aminotransferase OS=Candida albicans (strain SC5314 / ATCC MYA-2876) OX=237561 GN=AAT21 PE=3 SV=1	15	50	0.952988	0.321001	0.114763	1.002	0.962	0.944	0	-0.06	-0.08	10965.7	10521.7	10333	10942.8	1.18	3.35	2.81	1.66	14	High	High	High	High	High	High	High	High	High	High	High	High	10826.3	11085.1	10965.7	10779.5	10521.7	10085.4	10000	10577.4	10333	10942.8	10961.6	10640.5	1	7572.5
High	Master Protein	A0A1D8PCH2	mRNA-binding protein OS=Candida albicans (strain SC5314 / ATCC MYA-2876) OX=237561 GN=orf19.3333 PE=4 SV=1	9	35	0.820046	0.667519	0.114921	1.001	0.992	0.967	0	-0.01	-0.05	3075.2	3045.8	2970.1	3070.7	2.8	2.48	1.73	2.71	9	High	High	High	High	High	High	High	High	High	High	High	High	2966.7	3135.5	3075.2	2963.9	3045.8	3114.3	2993.9	2896	2970.1	3070.7	3058.5	3210.1	1	2075.1
High	Master Protein	O94069	5-aminolevulinate synthase, mitochondrial OS=Candida albicans (strain SC5314 / ATCC MYA-2876) OX=237561 GN=HEM1 PE=3 SV=2	15	45	0.882555	0.314607	0.115344	0.983	1.04	1.056	-0.02	0.06	0.08	5156.2	5455.9	5537.3	5245.8	2.14	2.88	2.26	2.87	15	High	High	High	High	High	High	High	High	High	High	High	High	5168.9	4973.4	5156.2	5208.7	5494.7	5455.9	5328.8	5537.3	5548	5245.8	5008.7	5283	1	3615.4
High	Master Protein	Q5ABX0	Serine/threonine-protein kinase TEL1 OS=Candida albicans (strain SC5314 / ATCC MYA-2876) OX=237561 GN=TEL1 PE=3 SV=2	2	2	0.945092	0.177837	0.115939	1.06	1.261	1.232	0.08	0.33	0.3	56.7	67.5	65.9	53.5	8.76	12.58	6.27	11.2	2	High	High	High	High	High	High	High	High	High	High	High	High	56.7	52.4	62.4	57.2	73.7	67.5	65.9	64.4	72.4	49.3	61.4	53.5	1	39.7
High	Master Protein	A0A1D8PRN2	Nicotinamide-nucleotide adenylyltransferase OS=Candida albicans (strain SC5314 / ATCC MYA-2876) OX=237561 GN=CAALFM_CR00350WA PE=3 SV=1	7	18	0.0705584	0.374428	0.116521	1.065	0.968	0.961	0.09	-0.05	-0.06	3159.9	2871.5	2849	2966	4.18	1.08	2.24	2.7	7	High	High	High	High	High	High	High	High	High	High	High	High	3092.2	3350	3159.9	2851.2	2871.5	2912.4	2849	2866.9	2749.7	2929.1	2966	3083.6	1	2162.8
High	Master Protein	Q5A4M7	Protein kinase OS=Candida albicans (strain SC5314 / ATCC MYA-2876) OX=237561 GN=PTK2 PE=4 SV=1	3	4	0.00946082	0.341958	0.116581	1.307	0.85	0.836	0.39	-0.23	-0.26	2184.8	1420.6	1396.7	1671.4	13.92	8.14	1.72	3.72	3	High	High	High	High	High	High	High	High	High	High	High	High	2184.8	1984.1	2600.1	1404.5	1420.6	1621	1379.7	1396.7	1427.4	1671.4	1604.5	1728.5	1	1528.2
High	Master Protein	A0A1D8PJK5	D-lactate dehydrogenase OS=Candida albicans (strain SC5314 / ATCC MYA-2876) OX=237561 GN=AIP2 PE=4 SV=1	18	88	0.995623	0.0789444	0.117923	1.021	1.061	1.049	0.03	0.09	0.07	12105.8	12577.7	12439.3	11853.5	1.65	2.56	2.87	1.84	18	High	High	High	High	High	High	High	High	High	High	High	High	12174.2	12105.8	11800.9	12346.6	12577.7	12985.1	12293.9	12439.3	12977.9	11853.5	11845.7	12231.5	1	8515.3
High	Master Protein	A0A1D8PDE8	Obg-like ATPase 1 OS=Candida albicans (strain SC5314 / ATCC MYA-2876) OX=237561 GN=YBN5 PE=3 SV=1	41	258	0.975621	0.336307	0.118841	1.007	1.021	1.047	0.01	0.03	0.07	42530.8	43107.1	44213.5	42214.7	0.27	2.16	2.99	0.82	41	High	High	High	High	High	High	High	High	High	High	High	High	42728.5	42530.8	42523	43107.1	42882.4	44609.3	45306.1	42682.8	44213.5	42214.7	42717.4	42050.4	1	29886.7
High	Master Protein	Q5AMP6	Oxidoreductase-like domain-containing protein OS=Candida albicans (strain SC5314 / ATCC MYA-2876) OX=237561 GN=orf19.4600 PE=4 SV=1	1	1	0.999989	0.999959	0.119296	0.958	0.979	1.077	-0.06	-0.03	0.11	369.9	378	415.8	386.1	3.6	3.16	4.82	4.26	1	High	High	High	High	High	High	High	High	High	High	High	High	369.9	393.3	369.5	366.8	390.7	378	390	429	415.8	388.5	359.5	386.1	1	258.7
High	Master Protein	A0A1D8PRJ6	Translation initiation factor eIF2 subunit beta OS=Candida albicans (strain SC5314 / ATCC MYA-2876) OX=237561 GN=SUI3 PE=3 SV=1	26	125	0.994016	0.0728942	0.120502	1	0.959	0.95	0	-0.06	-0.07	27299.2	26187.4	25940.3	27301.7	0.23	3.59	0.93	1.05	25	High	High	High	High	High	High	High	High	High	High	High	High	27318.1	27299.2	27200.2	26724.3	26187.4	24913.5	25940.3	26357.2	25937.2	27356	27301.7	26838.3	1	19107.9
High	Master Protein	Q5AP87	Altered inheritance of mitochondria protein 21 OS=Candida albicans (strain SC5314 / ATCC MYA-2876) OX=237561 GN=AIM21 PE=3 SV=2	1	4	0.395674	0.0719907	0.1213	1.033	1.052	1.038	0.05	0.07	0.05	617.9	629.4	621.2	598.4	1.07	2.38	2.56	1.7	1	High	High	High	High	High	High	High	High	High	High	High	High	617.9	628.3	615.9	621.5	650.7	629.4	648.7	620.3	621.2	598.4	597.6	615.8	1	432.2
High	Master Protein	A0A1D8PTI2	Rab family GTPase OS=Candida albicans (strain SC5314 / ATCC MYA-2876) OX=237561 GN=YPT31 PE=1 SV=1	17	72	0.304663	0.535791	0.121478	1.073	0.954	0.921	0.1	-0.07	-0.12	13316.6	11831.3	11425.5	12405.7	1.77	4.14	6.68	2.17	16	High	High	High	High	High	High	High	High	High	High	High	High	13007	13468.2	13316.6	12372.6	11831.3	11390.8	10638.2	12160.9	11425.5	12185.5	12721.6	12405.7	1	9097.8
High	Master Protein	A0A1D8PNB5	Rho family guanine nucleotide exchange factor OS=Candida albicans (strain SC5314 / ATCC MYA-2876) OX=237561 GN=CDC24 PE=4 SV=1	4	5	0.140954	0.69528	0.121627	1.033	1.023	1.054	0.05	0.03	0.08	1038	1028.3	1059.6	1005.2	4.32	1.5	1.69	2.43	4	High	High	High	High	High	High	High	High	High	High	High	High	1038	1106.9	1020.8	1035.7	1006.3	1028.3	1073.6	1059.6	1038.2	971.9	1019.3	1005.2	1	726
High	Master Protein	A0A1D8PRL4	Mis12p OS=Candida albicans (strain SC5314 / ATCC MYA-2876) OX=237561 GN=MIS12 PE=3 SV=1	50	204	0.328387	0.792755	0.121704	0.966	0.998	1.028	-0.05	0	0.04	30936.7	31956.7	32931.6	32034.6	1.53	2.16	1.79	1.54	47	High	High	High	High	High	High	High	High	High	High	High	High	31440.3	30494.5	30936.7	31956.7	33004.7	31689	33610.5	32931.6	32431.9	32102	31222.2	32034.6	1	21991.1
High	None	A0A1D8PKH8	Uncharacterized protein (Fragment) OS=Candida albicans (strain SC5314 / ATCC MYA-2876) OX=237561 GN=orf19.7398 PE=3 SV=1	7	27	0.377373	0.522752	0.122415	0.987	1.063	1.081	-0.02	0.09	0.11	3799.6	4090.1	4158.4	3848.5	2.64	3.77	2.09	2.29	7	High	High	High	High	High	High	High	High	High	High	High	High	3809.9	3633.7	3799.6	3852.6	4135.5	4090.1	4034.9	4158.4	4201.2	3841.9	3848.5	3999.7	1	2664.9
High	Master Protein	Q5A8Z9	Uncharacterized protein OS=Candida albicans (strain SC5314 / ATCC MYA-2876) OX=237561 GN=orf19.3335 PE=4 SV=1	16	94	0.99052	0.456721	0.122473	1.013	0.979	0.934	0.02	-0.03	-0.1	20644.5	19954.9	19034.3	20374.3	1.34	3.57	5.87	1.71	16	High	High	High	High	High	High	High	High	High	High	High	High	20644.5	20358	20910	19956.3	19954.9	18745.6	20074.2	19034.3	17845.2	20161.8	20843.6	20374.3	1	14439.9
High	Master Protein	A0A1D8PHV8	DNA-directed RNA polymerase subunit OS=Candida albicans (strain SC5314 / ATCC MYA-2876) OX=237561 GN=RPA12 PE=3 SV=1	5	17	0.751404	0.861269	0.122885	1.058	0.926	0.885	0.08	-0.11	-0.18	4209.9	3684.9	3520.2	3977.9	2.34	4.41	15.73	6.66	5	High	High	High	High	High	High	High	High	High	High	High	High	4209.9	4358.2	4169.9	3885.4	3684.9	3561.4	2676.6	3607.7	3520.2	3660.6	3977.9	4181.5	1	2944.7
Low	Master Protein	A0A1D8PG38	Pdr6p OS=Candida albicans (strain SC5314 / ATCC MYA-2876) OX=237561 GN=PDR6 PE=4 SV=1	1	1	0.189855	0.757853	0.123821	1.269	0.875	0.702	0.34	-0.19	-0.51	798.8	550.6	441.8	629.6	13.99	5.8	18.28	13.26	1	High	High	High	High	High	High	High	High	High	High	High	High	692.1	916.6	798.8	595.4	532.4	550.6	574.5	410.8	441.8	629.6	542.3	708.4	1	484.1
High	Master Protein	Q59SJ1	Signal peptidase complex subunit OS=Candida albicans (strain SC5314 / ATCC MYA-2876) OX=237561 GN=SPC2 PE=3 SV=1	4	7	0.836782	0.178615	0.128009	0.97	1.136	1.124	-0.04	0.18	0.17	1881.3	2202	2179.9	1939.2	0.82	6.28	5.41	3.38	4	High	High	High	High	High	High	High	High	High	High	High	High	1880	1881.3	1907.6	1971.4	2203	2202	2014.2	2179.9	2237.4	1939.2	1890	2020.4	1	1315
High	Master Protein	A0A1D8PF26	Selenoprotein O OS=Candida albicans (strain SC5314 / ATCC MYA-2876) OX=237561 GN=orf19.2346 PE=3 SV=1	1	2	0.126389	0.0504813	0.128077	1.129	1.16	1.146	0.18	0.21	0.2	307.6	315.9	312.1	272.4	2.42	0.58	9.67	3.69	1	High	High	High	High	High	High	High	High	High	High	High	High	300.3	315.2	307.6	315.1	318.6	315.9	312.1	277	336.3	266.8	272.4	286.5	1	210
Low	Master Protein	A0A1D8PIA8	Uncharacterized protein OS=Candida albicans (strain SC5314 / ATCC MYA-2876) OX=237561 GN=orf19.3625 PE=4 SV=1	1	5	0.34457	0.998663	0.128171	1.132	1.006	0.888	0.18	0.01	-0.17	439.2	390.3	344.6	387.9	9.06	7.26	2.92	5.33	1	High	High	High	High	High	High	High	High	High	High	High	High	393	439.2	471.3	363.1	390.3	419.9	353.1	333.1	344.6	376.7	387.9	417.3	1	274.9
High	Master Protein	Q5A4Z9	Mitochondrial 37S ribosomal protein YmS16 OS=Candida albicans (strain SC5314 / ATCC MYA-2876) OX=237561 GN=MRP17 PE=3 SV=1	3	5	0.120693	0.0221617	0.128224	0.883	0.886	0.901	-0.18	-0.17	-0.15	759.7	762.6	775.9	860.8	5.3	4.01	3.24	4.62	3	High	High	High	High	High	High	High	High	High	High	High	High	829.4	759.7	755.9	768.7	762.6	714	810.4	775.9	760.9	893.6	814.8	860.8	1	580.2
High	Master Protein	Q59LF9	Methionine aminopeptidase 2 OS=Candida albicans (strain SC5314 / ATCC MYA-2876) OX=237561 GN=MAP2 PE=3 SV=2	16	50	0.531925	0.210499	0.129694	1.033	0.957	0.925	0.05	-0.06	-0.11	13946.8	12921.8	12496.9	13506.5	1.24	4.88	3.65	0.42	16	High	High	High	High	High	High	High	High	High	High	High	High	13946.8	14227.7	13907.7	13382.2	12921.8	12145.4	12367	13227.1	12496.9	13506.5	13497.1	13600.7	1	9755.2
High	Master Protein	Q59YF0	Protein transport protein SSO2 OS=Candida albicans (strain SC5314 / ATCC MYA-2876) OX=237561 GN=SSO2 PE=3 SV=1	13	46	0.174595	0.0849162	0.130203	1.034	0.977	0.989	0.05	-0.03	-0.02	7791.2	7366.2	7453.6	7536.5	0.58	1.13	0.89	1.71	13	High	High	High	High	High	High	High	High	High	High	High	High	7810.4	7791.2	7725	7366.2	7505.6	7355.8	7453.6	7481.4	7355.9	7531.2	7759.7	7536.5	1	5463.1
High	Master Protein	Q5AD51	Ergosterol biosynthetic protein 28 OS=Candida albicans (strain SC5314 / ATCC MYA-2876) OX=237561 GN=ERG28 PE=3 SV=1	2	3	0.927387	0.882554	0.130358	0.995	0.993	1.076	-0.01	-0.01	0.11	804.7	803.5	870.2	808.8	1.37	1.5	3.22	2.85	2	High	High	High	High	High	High	High	High	High	High	High	High	817	804.7	794.9	791.6	815.7	803.5	874.4	870.2	824.6	795.9	808.8	841.1	1	571.5
High	Master Protein	Q5A473	Gvp36p OS=Candida albicans (strain SC5314 / ATCC MYA-2876) OX=237561 GN=GVP36 PE=4 SV=1	27	112	0.957225	0.872058	0.130801	0.972	1.008	1.066	-0.04	0.01	0.09	20780.9	21536.7	22771.6	21371.1	2.78	3.53	2.01	3.79	27	High	High	High	High	High	High	High	High	High	High	High	High	21622	20502.5	20780.9	21536.7	22461.9	20947.3	23000.6	22771.6	22124.8	21371.1	20377.9	21970.1	1	15123.6
High	Master Protein	A0A1D8PRJ5	Utp18p OS=Candida albicans (strain SC5314 / ATCC MYA-2876) OX=237561 GN=UTP18 PE=3 SV=1	13	23	0.299027	0.999942	0.131392	0.955	0.984	1.053	-0.07	-0.02	0.07	4632.5	4772.7	5108	4850.8	3.74	2.72	0.87	0.35	13	High	High	High	High	High	High	High	High	High	High	High	High	4874.6	4534.2	4632.5	4772.7	5000.4	4771.2	5125.1	5108	5041.2	4835.6	4850.8	4869.1	1	3409.6
High	Master Protein	A0A1D8PIB5	Jem1p OS=Candida albicans (strain SC5314 / ATCC MYA-2876) OX=237561 GN=JEM1 PE=4 SV=1	2	5	0.99859	0.549356	0.131501	1.011	1.079	1.118	0.02	0.11	0.16	521.7	556.6	576.8	516	4.84	6.89	16.5	5.88	2	High	High	High	High	High	High	High	High	High	High	High	High	495.9	521.7	546.4	544.4	618	556.6	750.2	563.9	576.8	516	545.5	484.8	1	346.9
High	Master Protein	A0A1D8PP59	Ubiquinol--cytochrome-c reductase subunit OS=Candida albicans (strain SC5314 / ATCC MYA-2876) OX=237561 GN=orf19.4016 PE=1 SV=1	23	171	0.699205	0.202651	0.131605	0.96	1.054	1.05	-0.06	0.08	0.07	29089	31938.6	31811.8	30305.9	2.53	5.14	2.72	0.44	23	High	High	High	High	High	High	High	High	High	High	High	High	30268.7	28890.7	29089	30475.9	31938.6	33766.2	31776.6	31811.8	33317.2	30109.4	30305.9	30363.1	1	21171.6
High	Master Protein	A0A1D8PTR1	Uncharacterized protein OS=Candida albicans (strain SC5314 / ATCC MYA-2876) OX=237561 GN=CAALFM_CR08520CA PE=4 SV=1	2	8	0.930796	0.509447	0.133364	1.051	0.923	0.836	0.07	-0.12	-0.26	2039.1	1790.7	1621.4	1939.8	2.4	6.78	14.71	4.94	2	High	High	High	High	High	High	High	High	High	High	High	High	2043.4	2039.1	1957.8	1837.7	1790.7	1613	1395.7	1875.2	1621.4	1833.2	2023.6	1939.8	1	1429.3
High	Master Protein	Q5AP67	DNA-directed RNA polymerase I subunit OS=Candida albicans (strain SC5314 / ATCC MYA-2876) OX=237561 GN=RPA34 PE=4 SV=1	6	17	0.999998	0.185317	0.133594	0.997	0.96	0.935	0	-0.06	-0.1	5147.3	4956.7	4831.4	5164.8	1.71	5.28	4.06	0.94	6	High	High	High	High	High	High	High	High	High	High	High	High	5087.3	5261.4	5147.3	4956.7	5021.9	4550.3	4602.7	4990.7	4831.4	5210.1	5113	5164.8	1	3558.4
Medium	Master Protein	A0A1D8PS92	DEAH-box RNA helicase OS=Candida albicans (strain SC5314 / ATCC MYA-2876) OX=237561 GN=CAALFM_CR02590CA PE=4 SV=1	1	3	0.189608	0.268206	0.133752	1.225	0.927	0.879	0.29	-0.11	-0.19	320.4	242.5	229.8	261.5	7.71	6.87	7.39	9.87	1	High	High	High	High	High	High	High	High	High	High	High	High	286.9	333.9	320.4	250.6	242.5	219.2	246.4	229.8	212.5	261.5	250.2	301.1	1	200.7
High	Master Protein	A0A1D8PHI5	Cytochrome c oxidase subunit 9, mitochondrial OS=Candida albicans (strain SC5314 / ATCC MYA-2876) OX=237561 GN=COX9 PE=3 SV=1	4	19	0.901347	0.281404	0.134976	0.99	0.963	0.94	-0.01	-0.05	-0.09	5896	5736.5	5596	5955.7	2.76	6.28	3.5	0.68	4	High	High	High	High	High	High	High	High	High	High	High	High	5896	5940.9	5642.2	5736.5	5863.7	5201.2	5596	5622.3	5276.3	5992.5	5912	5955.7	1	4124
High	Master Protein	O74189	Dolichyl-phosphate-mannose--protein mannosyltransferase 1 OS=Candida albicans (strain SC5314 / ATCC MYA-2876) OX=237561 GN=PMT1 PE=2 SV=1	15	41	0.373317	0.0121799	0.135513	1.024	1.054	1.041	0.03	0.08	0.06	7547.8	7768.8	7677.2	7372.4	0.64	1.68	1.7	2.36	15	High	High	High	High	High	High	High	High	High	High	High	High	7612.2	7547.8	7517.7	7739.9	7981.4	7768.8	7677.2	7750.4	7498.1	7210.8	7372.4	7559.5	1	5324.4
Low	Master Protein	A0A1D8PNM4	Uncharacterized protein OS=Candida albicans (strain SC5314 / ATCC MYA-2876) OX=237561 GN=orf19.4330 PE=4 SV=1	1	3	0.332798	0.765256	0.135914	1.123	0.968	0.855	0.17	-0.05	-0.23	1195	1030.3	909.6	1064.1	12.84	5.77	4.34	9.79	1	High	High	High	High	High	High	High	High	High	High	High	High	1087.2	1397.4	1195	932.5	1034.5	1030.3	851.8	909.6	925.8	1064.1	974.2	1183.9	1	760.5
Medium	None	A0A1D8PCM7	Zcf24p OS=Candida albicans (strain SC5314 / ATCC MYA-2876) OX=237561 GN=ZCF24 PE=4 SV=1	1	2	0.0294417	0.987494	0.136245	0.867	0.997	1.103	-0.21	0	0.14	376.8	433.1	478.9	434.4	0.52	7.61	5.56	2.49	1	High	High	High	High	High	High	High	High	High	High	High	High	376.8	379.6	375.8	433.1	462.2	396.8	509.5	478.9	456.1	447	425.4	434.4	1	263.5
High	Master Protein	Q5AJB7	Cullin OS=Candida albicans (strain SC5314 / ATCC MYA-2876) OX=237561 GN=CDC53 PE=3 SV=1	20	42	0.213552	0.997894	0.136321	1.045	0.984	0.975	0.06	-0.02	-0.04	6063.1	5705.4	5655.2	5799.9	0.43	3.06	3.46	1.26	20	High	High	High	High	High	High	High	High	High	High	High	High	6104.1	6055.5	6063.1	5705.4	5695.7	6008.2	5324	5655.2	5657.3	5761.7	5799.9	5903.6	1	4269.5
High	Master Protein	Q5A915	Uncharacterized protein OS=Candida albicans (strain SC5314 / ATCC MYA-2876) OX=237561 GN=orf19.3319 PE=4 SV=1	14	44	0.292941	0.942477	0.136434	1.029	0.978	0.953	0.04	-0.03	-0.07	6427.4	6108.2	5950.6	6243.9	0.63	3.49	0.88	2.42	14	High	High	High	High	High	High	High	High	High	High	High	High	6382.4	6462.8	6427.4	5957.4	6108.2	6380.9	5950.6	5982.4	5880.4	6044.3	6338.3	6243.9	1	4464.2
High	Master Protein	A0A1D8PU46	snoRNP complex protein OS=Candida albicans (strain SC5314 / ATCC MYA-2876) OX=237561 GN=SIK1 PE=3 SV=1	32	203	0.90791	0.97645	0.137027	0.983	1.002	1.032	-0.02	0	0.05	38076.7	38823.7	39997.1	38741.3	2.41	1.52	0.63	0.23	31	High	High	High	High	High	High	High	High	High	High	High	High	39481.9	37738.9	38076.7	38823.7	38942.6	37876	39605.7	40074.1	39997.1	38741.3	38636.6	38810.8	1	27615.9
High	Master Protein	Q59ZX3	Repressed by EFG1 protein 1 OS=Candida albicans (strain SC5314 / ATCC MYA-2876) OX=237561 GN=RBE1 PE=1 SV=1	3	7	0.366607	0.946992	0.137877	0.905	0.983	0.9	-0.14	-0.03	-0.15	1198.3	1301.2	1191.4	1324.2	4.93	4.44	3.67	4.9	3	High	High	High	High	High	High	High	High	High	High	High	High	1294.5	1183	1198.3	1301.2	1294.5	1400.2	1148.2	1191.4	1235.7	1359	1234.9	1324.2	1	905.4
High	Master Protein	Q5A2A5	Diadenosine tetraphosphate synthetase OS=Candida albicans (strain SC5314 / ATCC MYA-2876) OX=237561 GN=GRS1 PE=3 SV=1	47	260	0.160336	0.998359	0.13798	1.038	1.006	0.978	0.05	0.01	-0.03	56393.6	54624.6	53132.8	54320.9	1.03	0.97	1.84	1.37	47	High	High	High	High	High	High	High	High	High	High	High	High	55454.8	56393.6	56501.8	54624.6	54025.9	55079.8	54224.1	52270.6	53132.8	54172	55533.8	54320.9	1	38788.2
High	Master Protein	A0A1D8PCT0	1,3-beta-D-glucan-UDP glucosyltransferase OS=Candida albicans (strain SC5314 / ATCC MYA-2876) OX=237561 GN=GSC1 PE=3 SV=1	50	227	0.728382	0.346855	0.138418	1.016	1.03	1.028	0.02	0.04	0.04	35969.3	36465	36407.2	35409.6	0.29	1.94	1.54	1.89	49	High	High	High	High	High	High	High	High	High	High	High	High	35798.1	35969.3	35981.6	35477.5	36465	36836	37209.5	36127.1	36407.2	34791.8	35409.6	36129.5	1	25039.2
High	Master Protein	A0A1D8PJB0	Coatomer subunit alpha OS=Candida albicans (strain SC5314 / ATCC MYA-2876) OX=237561 GN=orf19.1672 PE=4 SV=1	45	130	0.951869	0.471184	0.138682	0.983	1.022	1.023	-0.02	0.03	0.03	21552.1	22407	22415	21919.4	1.23	0.64	3.68	1.43	45	High	High	High	High	High	High	High	High	High	High	High	High	21995.2	21552.1	21514.4	22330.6	22407	22608.6	23793.7	22415	22272.8	21919.4	21548.5	22171.4	1	15384.7
High	Master Protein	Q5AKW1	Uncharacterized protein OS=Candida albicans (strain SC5314 / ATCC MYA-2876) OX=237561 GN=orf19.5016 PE=3 SV=1	5	17	0.847947	0.210462	0.139929	0.981	1.074	1.09	-0.03	0.1	0.12	4100.4	4489.9	4556.5	4178.8	5.73	3.18	3.88	2.76	5	High	High	High	High	High	High	High	High	High	High	High	High	4321.9	3853.2	4100.4	4381.9	4489.9	4666.2	4382.4	4556.5	4735.8	4178.8	4095.3	4324.2	1	3023
High	Master Protein	Q5A3K7	Phosphoglycerate dehydrogenase OS=Candida albicans (strain SC5314 / ATCC MYA-2876) OX=237561 GN=SER33 PE=3 SV=1	20	107	0.976642	0.963662	0.140119	0.993	1.012	1.025	-0.01	0.02	0.04	17732.9	18065.4	18301	17849	0.37	2.03	4.44	0.19	20	High	High	High	High	High	High	High	High	High	High	High	High	17774.7	17645.4	17732.9	18374.9	18065.4	17645.5	19729.5	18301	18271	17831.8	17849	17896.6	1	12432.6
High	Master Protein	A0A1D8PPI2	DNA topoisomerase I OS=Candida albicans (strain SC5314 / ATCC MYA-2876) OX=237561 GN=TOP1 PE=3 SV=1	14	25	0.0732657	0.457393	0.140168	1.057	0.966	0.944	0.08	-0.05	-0.08	4953.3	4525.1	4420.4	4684.2	0.61	3.2	3.04	2.82	14	High	High	High	High	High	High	High	High	High	High	High	High	4939.1	4997.3	4953.3	4642.8	4525.1	4356.2	4420.4	4552.4	4283.7	4518.8	4684.2	4778.1	1	3454.7
High	Master Protein	A0A1D8PQP1	Uncharacterized protein OS=Candida albicans (strain SC5314 / ATCC MYA-2876) OX=237561 GN=orf19.7036 PE=4 SV=1	2	3	0.906998	0.59913	0.140465	1.115	0.862	0.873	0.16	-0.21	-0.2	871	673.5	681.9	781	3.83	12.51	20	8.48	2	High	High	High	High	High	High	High	High	High	High	High	High	832.4	898.5	871	807.8	673.5	640.9	485.2	719.3	681.9	781	887.3	759	1	582.2
High	Master Protein	Q5ABB0	Putative AAA family ATPase OS=Candida albicans (strain SC5314 / ATCC MYA-2876) OX=237561 GN=GCN20 PE=4 SV=1	26	73	1	0.131228	0.140524	1	0.986	0.98	0	-0.02	-0.03	8057.3	7948.2	7896.9	8057.2	0.95	1.3	0.89	1.33	25	High	High	High	High	High	High	High	High	High	High	High	High	8190.7	8057.3	8056.7	7799.1	7997	7948.2	7860.7	7996.8	7896.9	8057.2	8023.2	8223.9	1	5729
Medium	Master Protein	A0A1D8PLA2	Uncharacterized protein OS=Candida albicans (strain SC5314 / ATCC MYA-2876) OX=237561 GN=orf19.4643 PE=4 SV=1	1	3	0.688502	0.995129	0.140823	1.068	0.994	0.836	0.09	-0.01	-0.26	737.1	685.9	576.9	690.3	9.13	10.82	15.96	11.96	1	High	High	High	High	High	High	High	High	High	High	High	High	736.5	859.8	737.1	747.9	685.9	601.6	444.7	576.9	608	690.3	614.9	781	1	515.1
High	Master Protein	A0A1D8PFW1	Protein-lysine N-methyltransferase OS=Candida albicans (strain SC5314 / ATCC MYA-2876) OX=237561 GN=orf19.7223 PE=4 SV=1	4	13	0.976579	0.864209	0.141145	1.026	0.984	0.935	0.04	-0.02	-0.1	1632.4	1565.6	1487.9	1590.6	2.25	4.88	5.02	1.01	4	High	High	High	High	High	High	High	High	High	High	High	High	1575.5	1643.2	1632.4	1483	1565.6	1635.1	1487.9	1406.2	1555	1615.5	1585.4	1590.6	1	1102
High	Master Protein	A0A1D8PH39	Uncharacterized protein OS=Candida albicans (strain SC5314 / ATCC MYA-2876) OX=237561 GN=orf19.804.1 PE=4 SV=1	2	16	0.995297	0.556745	0.141297	1.014	0.986	0.896	0.02	-0.02	-0.16	5098.9	4959.1	4505.2	5027.7	0.32	9.41	3.56	1.42	2	High	High	High	High	High	High	High	High	High	High	High	High	5093	5124.1	5098.9	5127.4	4959.1	4276.6	4505.2	4737.3	4425.4	5027.7	5137.5	5002.5	1	3562.4
High	Master Protein	Q59Z57	Prb1p OS=Candida albicans (strain SC5314 / ATCC MYA-2876) OX=237561 GN=PRB1 PE=3 SV=1	5	8	0.659906	0.865359	0.143987	0.921	0.969	0.912	-0.12	-0.05	-0.13	1736.7	1826.6	1719.2	1885.8	5.92	3.61	7.98	2.96	5	High	High	High	High	High	High	High	High	High	High	High	High	1913.3	1736.7	1723.5	1886.1	1826.6	1754.5	1546.4	1812.7	1719.2	1885.8	1830.8	1942.6	1	1338.3
High	Master Protein	Q59V63	Emp24p OS=Candida albicans (strain SC5314 / ATCC MYA-2876) OX=237561 GN=EMP24 PE=3 SV=1	9	38	0.888412	0.0522383	0.144474	1.009	1.063	1.043	0.01	0.09	0.06	7097.3	7477.6	7334.4	7031.5	0.42	2.85	2.37	1.35	9	High	High	High	High	High	High	High	High	High	High	High	High	7097.3	7058.1	7117.1	7141	7528.4	7477.6	7334.4	7445	7106.3	7031.5	6905.2	7090.6	1	4964.3
High	Master Protein	Q5A362	Cystathionine gamma-lyase OS=Candida albicans (strain SC5314 / ATCC MYA-2876) OX=237561 GN=CYS3 PE=3 SV=1	19	100	0.261198	0.386155	0.144499	0.946	1.042	1.053	-0.08	0.06	0.07	19847.5	21854.5	22075.4	20972	2.9	4.01	3.37	1.9	19	High	High	High	High	High	High	High	High	High	High	High	High	20403.2	19253.5	19847.5	20922.6	21854.5	22671.6	21584.3	22075.4	23057.9	21224	20972	20444.6	1	14271.1
High	Master Protein	A0A1D8PM19	Uncharacterized protein OS=Candida albicans (strain SC5314 / ATCC MYA-2876) OX=237561 GN=orf19.1426 PE=4 SV=1	5	8	0.990915	0.334477	0.144566	0.938	0.898	0.869	-0.09	-0.15	-0.2	1111.6	1063.9	1028.9	1184.5	3.36	4.79	7.39	6.45	5	High	High	High	High	High	High	High	High	High	High	High	High	1168.8	1111.6	1097.4	1088.9	1063.9	992.1	1028.9	1087.9	938.5	1185.8	1057.4	1184.5	1	817.5
High	Master Protein	A0A1D8PMN9	Chaperonin-containing T-complex subunit OS=Candida albicans (strain SC5314 / ATCC MYA-2876) OX=237561 GN=CCT6 PE=3 SV=1	31	127	0.803811	0.533803	0.144794	0.98	1.015	1.026	-0.03	0.02	0.04	21234	21990.3	22243.8	21675.6	1.8	2.21	0.77	0.24	31	High	High	High	High	High	High	High	High	High	High	High	High	21864.7	21234	21162.3	21556.9	21990.3	22529.6	22243.8	22168.7	22496.9	21675.6	21691.1	21592.6	1	15293.4
Low	None	A0A1D8PPF7	ERCC4 domain-containing protein OS=Candida albicans (strain SC5314 / ATCC MYA-2876) OX=237561 GN=orf19.3648 PE=4 SV=1	1	6	0.145505	0.781322	0.145007	0.587	1.142	1.537	-0.77	0.19	0.62	2445	4756.8	6401.7	4166.1	34.4	18.49	11.91	12.08	1	High	High	High	High	High	High	High	High	High	High	High	High	3737.8	1932.1	2445	4756.8	5583.4	3836.5	6401.7	6579.9	5247.2	4354.2	4166.1	3441.6	1	2614.4
High	Master Protein	A0A1D8PJD2	Deoxyhypusine synthase OS=Candida albicans (strain SC5314 / ATCC MYA-2876) OX=237561 GN=orf19.1626 PE=3 SV=1	22	79	0.943765	0.949311	0.145078	1.019	1.021	1.033	0.03	0.03	0.05	11585.5	11608.8	11750.3	11373.1	0.41	1.27	1.8	2.18	22	High	High	High	High	High	High	High	High	High	High	High	High	11531.4	11585.5	11625.7	11418.4	11707.9	11608.8	12110.9	11731.2	11750.3	11342.2	11373.1	11790.3	1	8065.7
Low	Master Protein	Q9B8C8	NADH-ubiquinone oxidoreductase chain 4 OS=Candida albicans (strain SC5314 / ATCC MYA-2876) OX=237561 GN=NAD4 PE=3 SV=2	1	2	0.222456	0.627657	0.145471	0.939	0.943	1.12	-0.09	-0.08	0.16	589.3	591.7	702.5	627.3	7.05	7.07	3.2	3	1	High	High	High	High	High	High	High	High	High	High	High	High	589.3	521.6	592.4	591.7	632.9	549.3	702.5	715.3	671.9	627.3	640.9	603.9	1	412.2
High	Master Protein	Q59K86	3-hydroxyanthranilate 3,4-dioxygenase OS=Candida albicans (strain SC5314 / ATCC MYA-2876) OX=237561 GN=BNA1 PE=3 SV=1	3	7	0.237365	0.998249	0.146164	1.122	0.943	0.909	0.17	-0.08	-0.14	837.2	703.7	678.2	746.4	5	10.93	4.9	3.11	3	High	High	High	High	High	High	High	High	High	High	High	High	888.9	805.3	837.2	845.2	703.7	702.5	625.1	678.2	684	746.4	736.1	780.9	1	621.7
High	Master Protein	Q5A5A0	Thioredoxin peroxidase OS=Candida albicans (strain SC5314 / ATCC MYA-2876) OX=237561 GN=PRX1 PE=3 SV=1	20	109	0.51949	0.929426	0.148086	1.061	1.028	1.067	0.09	0.04	0.09	26714	25874.9	26844.3	25167.7	1.03	5.74	7.76	3.69	20	High	High	High	High	High	High	High	High	High	High	High	High	26712.1	27191.9	26714	27531.7	25874.9	24555	26802	30598.6	26844.3	25167.7	24482.3	26330.6	1	18684
High	Master Protein	A0A1D8PKD1	Rct1p OS=Candida albicans (strain SC5314 / ATCC MYA-2876) OX=237561 GN=RCT1 PE=4 SV=1	22	96	0.0388014	0.0267822	0.148691	1.364	1.266	1.178	0.45	0.34	0.24	28620.8	26572	24729.3	20986.5	15	6.78	3.66	5.65	22	High	High	High	High	High	High	High	High	High	High	High	High	22594.6	28620.8	30369	26400.9	26572	29721	24729.3	26186.5	24483.3	19794.7	20986.5	22163.5	1	15803.9
High	Master Protein	Q5A922	Altered inheritance of mitochondria protein 9, mitochondrial OS=Candida albicans (strain SC5314 / ATCC MYA-2876) OX=237561 GN=AIM9 PE=3 SV=2	25	61	0.238021	0.119063	0.149919	1.075	0.951	0.932	0.1	-0.07	-0.1	12456.3	11016	10794.9	11586.4	1.73	5.78	2.4	2.49	25	High	High	High	High	High	High	High	High	High	High	High	High	12220	12648.6	12456.3	11468.2	11016	10223.2	10789.4	11247.1	10794.9	11586.4	11530.4	12062.4	1	8547.4
High	Master Protein	A0A1D8PMK3	FG-nucleoporin OS=Candida albicans (strain SC5314 / ATCC MYA-2876) OX=237561 GN=NUP60 PE=4 SV=1	8	14	0.45197	0.268038	0.151184	0.956	1.031	1.045	-0.06	0.04	0.06	2458.9	2651.6	2687	2571.8	2.25	3.45	2.53	0.89	8	High	High	High	High	High	High	High	High	High	High	High	High	2551.8	2451.2	2458.9	2651.6	2589.3	2770.9	2687	2628	2763.9	2571.8	2540.2	2584.5	1	1784.9
High	Master Protein	P87163	Translation initiation factor eIF-2B subunit epsilon OS=Candida albicans (strain SC5314 / ATCC MYA-2876) OX=237561 GN=GCD6 PE=3 SV=3	24	78	0.54271	0.443292	0.151325	1.005	0.986	0.957	0.01	-0.02	-0.06	10856.1	10652	10338	10802.2	2.53	2.01	1.82	7.8	24	High	High	High	High	High	High	High	High	High	High	High	High	10427.4	10856.1	10931	10459.2	10652	10888.2	10182.3	10338	10557.6	10752.5	12300.7	10802.2	1	7293.5
High	Master Protein	Q59NP1	Copper transport protein CTR1 OS=Candida albicans (strain SC5314 / ATCC MYA-2876) OX=237561 GN=CTR1 PE=1 SV=1	1	3	0.633207	0.688462	0.151763	1.32	1.38	1.481	0.4	0.46	0.57	641.4	670.3	719.6	485.8	9.47	16.02	16.6	21.06	1	High	High	High	High	High	High	High	High	High	High	High	High	641.4	574.9	695.3	518.1	710.2	670.3	887.2	719.6	643.8	478.2	682.1	485.8	1	448.7
High	Master Protein	A0A1D8PQ34	Mdl2p OS=Candida albicans (strain SC5314 / ATCC MYA-2876) OX=237561 GN=MDL2 PE=4 SV=1	6	6	0.91483	1	0.152136	1.035	1.015	0.906	0.05	0.02	-0.14	1007.1	986.9	881.7	972.7	4.97	3.64	8.84	4.7	6	High	High	High	High	High	High	High	High	High	High	High	High	1007.1	1076.2	977.3	986.9	1025.5	953.5	961.6	881.7	805.5	953.1	1041.6	972.7	1	704.4
Medium	Master Protein	A0A1D8PL46	Translocase OS=Candida albicans (strain SC5314 / ATCC MYA-2876) OX=237561 GN=orf19.5675 PE=3 SV=1	1	1	0.637079	0.955057	0.15436	1.036	0.987	1.079	0.05	-0.02	0.11	564	537.4	587.7	544.6	2.61	3.32	3.08	3.87	1	High	High	High	High	High	High	High	High	High	High	High	High	564	584.3	555.4	562.8	528	537.4	603.2	567.2	587.7	532.1	544.6	573.6	1	394.5
High	Master Protein	Q5A693	Mitochondrial 54S ribosomal protein YmL11 OS=Candida albicans (strain SC5314 / ATCC MYA-2876) OX=237561 GN=orf19.3797 PE=3 SV=1	12	39	0.850257	0.772902	0.154457	1.012	0.987	0.967	0.02	-0.02	-0.05	5208.9	5076.9	4978.5	5145.9	1.91	2.51	0.79	1.99	12	High	High	High	High	High	High	High	High	High	High	High	High	5208.9	5363.3	5175.2	4997.9	5248.3	5076.9	5039.5	4965.3	4978.5	5105.6	5145.9	5300.9	1	3643.4
High	Master Protein	A0A1D8PIB8	Ribonuclease H2 subunit B OS=Candida albicans (strain SC5314 / ATCC MYA-2876) OX=237561 GN=orf19.4080 PE=4 SV=1	2	6	0.569055	0.549386	0.155617	1.121	0.915	0.938	0.17	-0.13	-0.09	1400.1	1142	1171.4	1248.7	4.09	6.05	10.08	5.5	2	High	High	High	High	High	High	High	High	High	High	High	High	1307.7	1409.2	1400.1	1261.5	1142	1134.3	986.4	1171.4	1189.6	1219.3	1352.7	1248.7	1	914.7
High	Master Protein	Q5AQ62	WD repeat-containing protein JIP5 OS=Candida albicans (strain SC5314 / ATCC MYA-2876) OX=237561 GN=JIP5 PE=3 SV=2	5	10	0.87975	0.488441	0.155688	1.037	0.943	0.911	0.05	-0.09	-0.13	1269.4	1154.1	1115.2	1224.4	2.55	1.97	9.29	2.08	5	High	High	High	High	High	High	High	High	High	High	High	High	1235.6	1300.4	1269.4	1154.1	1182.2	1137	1016.1	1223.8	1115.2	1208.6	1258.7	1224.4	1	864.3
High	Master Protein	Q9P975	Eukaryotic translation initiation factor 4E OS=Candida albicans (strain SC5314 / ATCC MYA-2876) OX=237561 GN=TIF45 PE=3 SV=1	18	98	0.997031	0.994301	0.157239	1.009	0.989	0.974	0.01	-0.02	-0.04	22155.1	21723.2	21400.9	21961.2	0.28	2.06	3.91	1.32	18	High	High	High	High	High	High	High	High	High	High	High	High	22063.9	22155.1	22181.9	21723.2	22471.6	21657.2	20148.2	21704.8	21400.9	21817.6	21961.2	22376.8	1	15432.7
High	None	Q5A894	Oye22p OS=Candida albicans (strain SC5314 / ATCC MYA-2876) OX=237561 GN=OYE22 PE=4 SV=1	2	6	0.991246	0.991831	0.157454	0.987	1.005	0.891	-0.02	0.01	-0.17	1659.5	1688.7	1497.2	1680.5	1.64	1.38	7.71	4.63	0	Not Found	Not Found	Not Found	Not Found	Not Found	Not Found	Not Found	Not Found	Not Found	Not Found	Not Found	Not Found	1688.3	1634	1659.5	1688.7	1722.1	1677	1445.6	1671.9	1497.2	1756.7	1601.2	1680.5	3	1180.9
High	Master Protein	A0A1D8PDV5	Rho family GTPase OS=Candida albicans (strain SC5314 / ATCC MYA-2876) OX=237561 GN=RAC1 PE=4 SV=1	10	30	0.866479	0.224668	0.157676	1.024	0.944	0.892	0.03	-0.08	-0.16	4739.6	4366.3	4127.8	4627.5	2.94	2.92	7.76	0.95	10	High	High	High	High	High	High	High	High	High	High	High	High	4644.7	4921.1	4739.6	4366.3	4381.4	4156.8	4647.2	4127.8	4031.2	4687.2	4600.7	4627.5	1	3248.8
High	Master Protein	Q5A798	Mitochondrial 54S ribosomal protein YmL3 OS=Candida albicans (strain SC5314 / ATCC MYA-2876) OX=237561 GN=MRPL3 PE=4 SV=1	21	76	0.568473	0.985315	0.158099	0.973	0.995	1.049	-0.04	-0.01	0.07	13669.7	13990.6	14749.5	14054	1.96	2.76	2.74	2.18	21	High	High	High	High	High	High	High	High	High	High	High	High	13669.7	13435.6	13971.3	13876.7	14603	13990.6	14333.8	15141.9	14749.5	14368.8	13757.1	14054	1	9561.3
High	Master Protein	A0A1D8PGM4	U3 small nucleolar RNA-associated protein 22 OS=Candida albicans (strain SC5314 / ATCC MYA-2876) OX=237561 GN=UTP22 PE=3 SV=1	40	91	0.999532	0.529082	0.160199	1.015	1.032	1.043	0.02	0.05	0.06	13007.9	13235.9	13368.1	12819.6	1.23	1.54	1.15	2.03	40	High	High	High	High	High	High	High	High	High	High	High	High	13007.9	13069.7	12767.2	12974.4	13235.9	13375.2	13194.3	13368.1	13501.3	12819.6	12809.8	13270.2	1	9098.5
High	Master Protein	A0A1D8PF68	S-adenosylmethionine synthase OS=Candida albicans (strain SC5314 / ATCC MYA-2876) OX=237561 GN=SAM2 PE=3 SV=1	34	233	0.0816352	0.785768	0.160552	0.959	1.015	1.028	-0.06	0.02	0.04	48269.5	51037.4	51694.8	50307.6	0.82	1.44	1.78	1.67	34	High	High	High	High	High	High	High	High	High	High	High	High	48777.1	47991	48269.5	51038.8	51037.4	49772.7	50505.9	51694.8	52305.7	50720.1	50307.6	49111.7	1	34117.4
High	Master Protein	Q59PD6	Spindle assembly checkpoint component MAD1 OS=Candida albicans (strain SC5314 / ATCC MYA-2876) OX=237561 GN=MAD1 PE=3 SV=2	5	13	0.889315	0.194113	0.16122	1.009	0.896	0.913	0.01	-0.16	-0.13	1035.1	918.7	936	1025.7	3.23	6.55	7.93	3.17	4	High	High	High	High	High	High	High	High	High	High	High	High	1035.1	1087.6	1024.2	974.6	918.7	854.8	967.3	936	829.5	978.7	1025.7	1040.2	1	724
Medium	None	A0A1D8PIU7	Helicase ATP-binding domain-containing protein OS=Candida albicans (strain SC5314 / ATCC MYA-2876) OX=237561 GN=orf19.5469 PE=4 SV=1	1	2	0.999993	0.6527	0.161813	0.953	1.025	1.085	-0.07	0.04	0.12	451	485.1	513.5	473.1	4.16	3.13	5.87	6.31	1	High	High	High	High	High	High	High	High	High	High	High	High	445	480.7	451	466.1	496	485.1	513.5	474.6	533.1	473.1	426.4	479.6	1	311.2
High	Master Protein	A0A1D8PQ57	Bifunctional AP-4-A phosphorylase/ADP sulfurylase OS=Candida albicans (strain SC5314 / ATCC MYA-2876) OX=237561 GN=APA2 PE=4 SV=1	11	29	0.605859	0.998862	0.162022	0.982	1.011	1.048	-0.03	0.02	0.07	5051.3	5196.2	5387.5	5141.9	0.21	1.57	2.9	0.24	11	High	High	High	High	High	High	High	High	High	High	High	High	5043.3	5051.3	5064.6	5196.2	5200	5058.4	5411.4	5387.5	5133.6	5128.6	5152.8	5141.9	1	3527.6
Medium	None	A0A1D8PTJ9	Hgt14p OS=Candida albicans (strain SC5314 / ATCC MYA-2876) OX=237561 GN=HGT14 PE=3 SV=1	1	2	0.879742	0.587048	0.163161	1.104	0.866	0.85	0.14	-0.21	-0.23	395	309.8	304.2	357.8	9.85	9.25	24	10.84	1	High	High	High	High	High	High	High	High	High	High	High	High	385.2	460.2	395	353.4	309.8	296.9	209.4	342.5	304.2	349.6	424.2	357.8	1	269.4
High	Master Protein	Q59KG2	Respiratory growth induced protein 1 OS=Candida albicans (strain SC5314 / ATCC MYA-2876) OX=237561 GN=RGI1 PE=2 SV=1	15	90	0.988424	0.997772	0.16434	0.98	0.993	0.784	-0.03	-0.01	-0.35	17575.4	17803.5	14054.5	17936.6	1.06	0.22	18.92	1.61	15	High	High	High	High	High	High	High	High	High	High	High	High	17440.3	17807.6	17575.4	17812.1	17740.7	17803.5	18597	14054.5	13221.5	17936.6	17791.8	18352.6	1	12198.7
High	Master Protein	A0A1D8PT01	Mitochondrial 18 kDa protein OS=Candida albicans (strain SC5314 / ATCC MYA-2876) OX=237561 GN=CAALFM_CR05450CA PE=3 SV=1	2	9	0.912581	0.657801	0.164529	1.066	0.949	0.895	0.09	-0.07	-0.16	1142.4	1017.3	958.6	1071.5	6.56	2.85	10.55	6	2	High	High	High	High	High	High	High	High	High	High	High	High	1142.4	1217.1	1067.2	1017.3	1060.5	1004.7	864.6	1067.7	958.6	1053.2	1175.7	1071.5	1	799.1
High	Master Protein	A0A1D8PDG9	Uncharacterized protein OS=Candida albicans (strain SC5314 / ATCC MYA-2876) OX=237561 GN=orf19.445 PE=4 SV=1	2	6	0.552784	0.783811	0.164671	0.887	1.028	1.097	-0.17	0.04	0.13	411.3	477	509	463.9	7.94	4.46	4.75	3.49	2	High	High	High	High	High	High	High	High	High	High	High	High	470.2	411.3	410.5	477	496.6	454.2	481.1	529	509	463.9	467.4	438.2	1	328.9
High	Master Protein	Q5A6R1	Ribosomal protein L15 OS=Candida albicans (strain SC5314 / ATCC MYA-2876) OX=237561 GN=RPL15A PE=3 SV=1	14	118	0.655274	0.998767	0.165479	0.972	1.001	1.07	-0.04	0	0.1	47214	48632.3	51969.7	48578.3	0.66	4.98	7.24	2.43	14	High	High	High	High	High	High	High	High	High	High	High	High	47350	46760.6	47214	48632.3	52284.9	47589.5	58184.3	51023.3	51969.7	50584.2	48451.5	48578.3	1	33119.3
High	Master Protein	Q5AC28	Uncharacterized protein OS=Candida albicans (strain SC5314 / ATCC MYA-2876) OX=237561 GN=orf19.5522 PE=4 SV=1	7	20	0.362089	0.449599	0.165775	1.045	1.034	0.942	0.06	0.05	-0.09	3213	3180.7	2898.5	3075.6	2.77	1.93	2.14	5.06	7	High	High	High	High	High	High	High	High	High	High	High	High	3309.9	3131.7	3213	3180.7	3153.4	3271.7	2822.3	2945	2898.5	3075.6	2919.3	3230.6	1	2315.1
High	Master Protein	A0A1D8PPT5	Ribosomal 60S subunit protein L23B OS=Candida albicans (strain SC5314 / ATCC MYA-2876) OX=237561 GN=RPL23A PE=3 SV=1	14	134	0.21022	0.746425	0.166565	0.968	0.996	1.044	-0.05	-0.01	0.06	25415.2	26157.2	27408.2	26252.2	1.03	3.73	1.37	1.39	14	High	High	High	High	High	High	High	High	High	High	High	High	25019.5	25513.1	25415.2	26157.2	26633.3	24776	27830.6	27408.2	27078.3	26711.1	26252.2	25985.5	1	17500.1
High	Master Protein	Q5A8Y7	DNA-directed RNA polymerase II subunit OS=Candida albicans (strain SC5314 / ATCC MYA-2876) OX=237561 GN=RPB7 PE=3 SV=1	6	16	0.999097	0.176697	0.167441	1.018	1.048	1.048	0.03	0.07	0.07	2196.2	2259.9	2260.3	2157.3	3.05	1.43	1.67	2.35	6	High	High	High	High	High	High	High	High	High	High	High	High	2232.2	2103.5	2196.2	2259.9	2312.1	2252.5	2249.3	2260.3	2320	2157.3	2148.2	2241.3	1	1561.3
High	None	Q59UH5	DNA replication regulator SLD2 OS=Candida albicans (strain SC5314 / ATCC MYA-2876) OX=237561 GN=SLD2 PE=3 SV=1	1	1	0.734837	0.473916	0.168335	0.923	1.145	1.222	-0.12	0.2	0.29	210.7	261.3	278.7	228.2	15.13	7.15	5.51	8.5	1	High	High	High	High	High	High	High	High	High	High	High	High	255.7	191	210.7	287	261.3	249.9	301.2	271.1	278.7	221.8	259.4	228.2	1	178.9
Medium	None	A0A1D8PDM2	Uncharacterized protein OS=Candida albicans (strain SC5314 / ATCC MYA-2876) OX=237561 GN=orf19.2476 PE=4 SV=1	1	9	0.948072	0.341547	0.16944	1.111	0.843	0.86	0.15	-0.25	-0.22	3060.4	2324	2368.7	2755.4	2.65	15.38	17.41	9.15	1	High	High	High	High	High	High	High	High	High	High	High	High	2943.5	3097.3	3060.4	2802	2324	2075.4	1842.9	2619.8	2368.7	2696.8	3179.4	2755.4	1	2058.9
High	Master Protein	Q5A516	ADP/ATP translocase OS=Candida albicans (strain SC5314 / ATCC MYA-2876) OX=237561 GN=PET9 PE=3 SV=1	37	342	0.440018	0.686266	0.170228	0.948	0.979	1.053	-0.08	-0.03	0.07	80903.5	83510.6	89864.6	85336.9	0.79	4.68	3.17	3.4	37	High	High	High	High	High	High	High	High	High	High	High	High	80903.5	79859.9	81023.3	84212.1	83510.6	77275.3	92497	89864.6	86813.1	85336.9	86298	80928	1	56588.5
High	Master Protein	Q59LL5	Imidazoleglycerol-phosphate dehydratase OS=Candida albicans (strain SC5314 / ATCC MYA-2876) OX=237561 GN=HIS3 PE=3 SV=1	1	4	0.899604	0.614848	0.170585	0.982	1.059	1.131	-0.03	0.08	0.18	88.9	95.9	102.4	90.5	7.52	7.8	4.32	6.18	1	High	High	High	High	High	High	High	High	High	High	High	High	90.4	88.9	78.5	95.9	102.8	87.9	104.8	102.4	96.3	90.5	83.1	93.9	1	63.2
High	Master Protein	A0A1D8PPY6	Uncharacterized protein OS=Candida albicans (strain SC5314 / ATCC MYA-2876) OX=237561 GN=orf19.5541 PE=4 SV=1	15	59	0.225637	0.589752	0.172334	1.024	0.976	0.976	0.03	-0.04	-0.03	10477	9985.6	9990.7	10233.5	0.87	0.19	2.92	1.87	15	High	High	High	High	High	High	High	High	High	High	High	High	10477	10591.8	10411.9	9985.6	9993	9957.4	9500.4	9990.7	10005.8	9959.2	10233.5	10323.5	1	7328.2
High	Master Protein	Q5APF0	Ribosome biogenesis protein YTM1 OS=Candida albicans (strain SC5314 / ATCC MYA-2876) OX=237561 GN=YTM1 PE=3 SV=1	23	74	0.55183	0.444959	0.172953	0.962	1.057	1.062	-0.06	0.08	0.09	11909.9	13084	13141.4	12378.5	2.95	4.78	1.62	1.46	23	High	High	High	High	High	High	High	High	High	High	High	High	12320.4	11619.1	11909.9	12161.7	13084	13327.9	12856	13141.4	13271.1	12378.5	12169.2	12527.8	1	8617.6
High	Master Protein	Q59YC4	CCT-beta OS=Candida albicans (strain SC5314 / ATCC MYA-2876) OX=237561 GN=CCT2 PE=3 SV=1	30	147	0.485731	0.464685	0.174741	1.009	0.972	0.961	0.01	-0.04	-0.06	19137.8	18430.8	18220.6	18964.4	0.33	1.18	1.59	2.12	27	High	High	High	High	High	High	High	High	High	High	High	High	19137.8	19200.9	19074	18260.1	18430.8	18692.1	18041.1	18220.6	18610.4	18349.8	19095.5	18964.4	1	13386.1
Medium	Master Protein	A0A1D8PP30	Uncharacterized protein OS=Candida albicans (strain SC5314 / ATCC MYA-2876) OX=237561 GN=orf19.3970 PE=4 SV=1	1	1	0.887248	0.937145	0.175575	0.992	1.039	1.046	-0.01	0.06	0.06	543.4	569.4	573.1	548	1.85	2.75	3.51	2.38	1	High	High	High	High	High	High	High	High	High	High	High	High	535.9	543.4	555.8	569.4	570	542.9	606	573.1	568.5	548	568.8	544.4	1	374.8
High	Master Protein	A0A1D8PMH6	Tryptophan synthase OS=Candida albicans (strain SC5314 / ATCC MYA-2876) OX=237561 GN=TRP5 PE=3 SV=1	25	115	0.841892	0.294131	0.176535	1.013	1.042	1.04	0.02	0.06	0.06	16779	17265.7	17222.9	16562	0.71	2.76	0.93	1.7	25	High	High	High	High	High	High	High	High	High	High	High	High	16779	16735	16961.2	16556.9	17265.7	17449.4	17004	17314.1	17222.9	16562	16389.7	16943.7	1	11736.2
High	Master Protein	Q5ABZ2	Transcription factor RBF1 OS=Candida albicans (strain SC5314 / ATCC MYA-2876) OX=237561 GN=RBF1 PE=1 SV=1	5	8	0.357513	0.239983	0.177246	1.067	0.904	0.934	0.09	-0.15	-0.1	1152.2	976	1008.4	1079.7	1.9	1.22	8.89	2.38	5	High	High	High	High	High	High	High	High	High	High	High	High	1152.2	1157.3	1117.4	973.4	995.4	976	877	1040.9	1008.4	1036.4	1080.8	1079.7	1	805.9
High	Master Protein	A0A1D8PRX9	Uncharacterized protein OS=Candida albicans (strain SC5314 / ATCC MYA-2876) OX=237561 GN=CAALFM_CR01300WA PE=4 SV=1	3	13	0.90429	0.789968	0.177519	1.046	0.962	0.929	0.07	-0.06	-0.11	1698.9	1562.4	1508.5	1623.5	1.36	4.77	9.24	3.05	3	High	High	High	High	High	High	High	High	High	High	High	High	1681.1	1698.9	1727.1	1562.4	1524	1669.9	1349.8	1508.5	1624.8	1623.5	1622.6	1710.4	1	1175.8
High	Master Protein	A0A1D8PLN7	Elongator subunit OS=Candida albicans (strain SC5314 / ATCC MYA-2876) OX=237561 GN=orf19.2711 PE=3 SV=1	7	16	0.437472	0.98332	0.177671	0.966	0.978	1.045	-0.05	-0.03	0.06	1766.1	1788.9	1910.5	1828.9	3.27	4.01	2.83	1.2	7	High	High	High	High	High	High	High	High	High	High	High	High	1809	1766.1	1695.3	1788.9	1891.8	1751.5	1994	1910.5	1891	1802.5	1828.9	1845.8	1	1265.3
High	Master Protein	A0A1D8PI93	Proteasome regulatory particle base subunit OS=Candida albicans (strain SC5314 / ATCC MYA-2876) OX=237561 GN=RPT6 PE=3 SV=1	21	85	0.816949	0.255589	0.178435	0.977	0.974	0.972	-0.03	-0.04	-0.04	17885.3	17837.1	17794.1	18310.9	1.75	2.55	3.09	0.9	20	High	High	High	High	High	High	High	High	High	High	High	High	18418.8	17860.9	17885.3	17837.1	18033.3	17174.4	18013.8	17794.1	16981.8	18310.9	18525	18200.4	1	12883.1
High	Master Protein	Q59ZH8	Translation termination factor eRF1 OS=Candida albicans (strain SC5314 / ATCC MYA-2876) OX=237561 GN=ERF1 PE=3 SV=1	39	189	0.993642	0.469404	0.178743	0.994	1.021	1.054	-0.01	0.03	0.08	34686.7	35633.4	36795.6	34911.3	0.99	2.87	4.03	0.76	39	High	High	High	High	High	High	High	High	High	High	High	High	35271.6	34660.5	34686.7	35554.7	35633.4	37391	36795.6	35303.2	38266.8	34897	34911.3	35367.1	1	24671
High	Master Protein	A0A1D8PG01	Emc9p OS=Candida albicans (strain SC5314 / ATCC MYA-2876) OX=237561 GN=EMC9 PE=4 SV=1	1	1	0.847941	0.151274	0.178786	1.062	1.152	1.129	0.09	0.2	0.17	154	167	163.6	145	2.22	13.25	9.5	1.05	1	High	High	High	High	High	High	High	High	High	High	High	High	155.8	149.2	154	167	150.9	195.7	156.9	163.6	187.5	143.5	145	146.5	1	109
High	Master Protein	P0C075	Autophagy-related protein 8 OS=Candida albicans (strain SC5314 / ATCC MYA-2876) OX=237561 GN=ATG8 PE=2 SV=1	1	1	0.821376	0.551598	0.179679	1.066	1.055	1.148	0.09	0.08	0.2	249.2	246.7	268.4	233.8	1.71	7.33	7.44	6.27	1	High	High	High	High	High	High	High	High	High	High	High	High	249.2	243.1	251.2	246.7	275.8	241	285.4	268.4	245.9	254.1	225	233.8	1	174.3
High	Master Protein	A0A1D8PGT1	Putative carboxylic ester hydrolase OS=Candida albicans (strain SC5314 / ATCC MYA-2876) OX=237561 GN=orf19.5782 PE=4 SV=1	2	4	0.378869	0.453372	0.179704	1.112	0.911	0.857	0.15	-0.13	-0.22	752.5	616.9	580	676.8	7	6.4	13.02	5.22	2	High	High	High	High	High	High	High	High	High	High	High	High	737.4	838.2	752.5	662.1	616.9	583	522.6	675.4	580	662.3	730.6	676.8	1	515.8
High	Master Protein	Q5A2I3	RING-type domain-containing protein OS=Candida albicans (strain SC5314 / ATCC MYA-2876) OX=237561 GN=orf19.1314 PE=4 SV=1	1	1	0.158713	0.822694	0.180874	1.205	0.989	0.922	0.27	-0.02	-0.12	346.2	284.1	264.7	287.2	5.3	5.09	11.44	4.21	1	High	High	High	High	High	High	High	High	High	High	High	High	318.1	351.5	346.2	290.8	284.1	263.5	283.4	264.7	225.6	308.3	287.2	286.6	1	222.5
High	Master Protein	Q5A4P2	Ubiquinone biosynthesis O-methyltransferase, mitochondrial OS=Candida albicans (strain SC5314 / ATCC MYA-2876) OX=237561 GN=COQ3 PE=3 SV=1	4	12	0.987743	0.664403	0.181885	0.997	0.969	0.97	0	-0.04	-0.04	1440.2	1399.9	1401.2	1444.1	1.23	3.34	3.86	2.41	4	High	High	High	High	High	High	High	High	High	High	High	High	1440.2	1457.2	1421.8	1463.8	1399.9	1371.6	1314	1410.2	1401.2	1419.8	1488.7	1444.1	1	1007.4
Low	Master Protein	A0A1D8PCW2	Hol1p OS=Candida albicans (strain SC5314 / ATCC MYA-2876) OX=237561 GN=HOL1 PE=4 SV=1	1	1	0.967854	0.98417	0.182197	1.054	1.003	0.911	0.08	0	-0.14	245.8	234	212.4	233.3	1.76	11.41	11.89	4.19	1	High	High	High	High	High	High	High	High	High	High	High	High	248.2	239.8	245.8	257.5	234	204.6	219.7	212.4	174.9	233.3	229.5	248.3	1	173.6
High	Master Protein	Q5ADN2	Putative phosphomutase OS=Candida albicans (strain SC5314 / ATCC MYA-2876) OX=237561 GN=orf19.6809 PE=4 SV=1	17	53	0.169057	0.983442	0.183056	1.051	1.003	0.957	0.07	0	-0.06	7967.2	7603.7	7253.2	7580.3	0.85	3.23	1.87	3.48	17	High	High	High	High	High	High	High	High	High	High	High	High	8074.7	7948.8	7967.2	7293.7	7603.7	7775.1	7120.9	7392	7253.2	7368.9	7580.3	7895.7	1	5647.9
High	Master Protein	A0A1D8PPZ0	Complex I-B22 OS=Candida albicans (strain SC5314 / ATCC MYA-2876) OX=237561 GN=orf19.5547 PE=3 SV=1	7	58	0.96049	0.141508	0.183101	0.991	0.959	0.946	-0.01	-0.06	-0.08	11502.4	11136.7	10981	11608.9	0.46	3.71	2.71	1.04	7	High	High	High	High	High	High	High	High	High	High	High	High	11586.5	11502.4	11489.2	11136.7	11490.1	10669.1	10943.7	11484.8	10981	11766.7	11528.5	11608.9	1	8104.3
High	Master Protein	Q5AC33	NADP-dependent alcohol dehydrogenase OS=Candida albicans (strain SC5314 / ATCC MYA-2876) OX=237561 GN=orf19.5517 PE=3 SV=1	13	36	0.639327	0.9998	0.183674	0.971	0.98	1.041	-0.04	-0.03	0.06	9270.6	9350.9	9937.1	9544.2	1.48	4.11	1.11	1.13	13	High	High	High	High	High	High	High	High	High	High	High	High	9412.5	9138.6	9270.6	9350.9	9914.8	9167.4	9779.4	9990.6	9937.1	9544.2	9363.4	9553.7	1	6583.6
High	Master Protein	A0A1D8PDY0	Uncharacterized protein OS=Candida albicans (strain SC5314 / ATCC MYA-2876) OX=237561 GN=orf19.6225.1 PE=3 SV=1	3	9	0.622195	0.999999	0.184543	0.961	1.015	1.105	-0.06	0.02	0.14	1307.9	1381	1503.2	1360.8	3.25	6.05	5.11	2.98	3	High	High	High	High	High	High	High	High	High	High	High	High	1343.6	1259.3	1307.9	1381	1442.1	1278.4	1403.5	1552.6	1503.2	1360.8	1326.7	1407.8	1	939.8
High	Master Protein	Q59QC4	Kynureninase OS=Candida albicans (strain SC5314 / ATCC MYA-2876) OX=237561 GN=BNA5 PE=3 SV=1	9	16	0.971197	0.279825	0.185277	0.973	1.052	1.131	-0.04	0.07	0.18	1910.6	2065.6	2220.1	1963.6	2.73	9.57	5.29	1.55	9	High	High	High	High	High	High	High	High	High	High	High	High	1910.6	1995	1897.9	2065.6	2023.9	2401.7	2220.1	2062.6	2288.7	1963.6	1947.9	2007	1	1336.4
Medium	None	Q5ADY2	AB hydrolase-1 domain-containing protein OS=Candida albicans (strain SC5314 / ATCC MYA-2876) OX=237561 GN=orf19.6709 PE=4 SV=1	1	10	0.818015	0.282751	0.185379	1.155	0.822	0.88	0.21	-0.28	-0.18	3712.8	2639.7	2828.2	3213.2	4.11	16.14	15.74	11.56	0	Not Found	Not Found	Not Found	Not Found	Not Found	Not Found	Not Found	Not Found	Not Found	Not Found	Not Found	Not Found	3491.3	3778	3712.8	3221.4	2639.7	2354.1	2171.6	2945	2828.2	3050	3787.1	3213.2	3	2442
High	Master Protein	A0A1D8PMU3	Uncharacterized protein OS=Candida albicans (strain SC5314 / ATCC MYA-2876) OX=237561 GN=orf19.5681 PE=4 SV=1	2	5	0.825221	0.980391	0.186196	0.83	0.922	0.776	-0.27	-0.12	-0.37	37	41.1	34.6	44.6	6.76	7.16	10.55	14.73	2	High	High	High	High	High	High	High	High	High	High	High	High	36.9	37	41.5	41	46.4	41.1	37.5	34.6	30.4	34.7	44.6	45.9	1	25.8
High	Master Protein	A0A1D8PFV0	High-affinity iron permease OS=Candida albicans (strain SC5314 / ATCC MYA-2876) OX=237561 GN=FTR1 PE=3 SV=1	4	6	0.291183	0.990555	0.186751	1.2	1.139	0.84	0.26	0.19	-0.25	764	725.4	535	636.9	8.33	9.36	8.5	15.93	2	High	High	High	High	High	High	High	High	High	High	High	High	764	879	762.7	620.4	739.5	725.4	520.5	608.4	535	601.2	636.9	804.3	1	534.4
High	Master Protein	A0A1D8PDT4	60S ribosomal protein L39 OS=Candida albicans (strain SC5314 / ATCC MYA-2876) OX=237561 GN=CAALFM_C106470WA PE=3 SV=1	2	7	0.266689	0.851963	0.186802	0.843	1.134	1.322	-0.25	0.18	0.4	2518.1	3388.1	3949.6	2988.5	16.25	8.84	11.76	9.06	2	High	High	High	High	High	High	High	High	High	High	High	High	3034.2	2201.9	2518.1	3388.1	3650.9	3057.4	4303.2	3949.6	3397.1	3437.9	2988.5	2917.7	1	2122.3
High	Master Protein	A0A1D8PD57	Geranylgeranyl transferase type-2 subunit alpha OS=Candida albicans (strain SC5314 / ATCC MYA-2876) OX=237561 GN=BET4 PE=3 SV=1	3	5	0.460933	0.0886949	0.186805	1.059	1.067	1.055	0.08	0.09	0.08	749.7	754.8	747	707.7	4.66	4.32	0.42	2.69	3	High	High	High	High	High	High	High	High	High	High	High	High	749.7	751.8	691.8	726.4	754.8	791.7	748.1	742.2	747	712.8	678	707.7	1	524.4
High	Master Protein	Q5A4E3	Initiation-specific alpha-1,6-mannosyltransferase OS=Candida albicans (strain SC5314 / ATCC MYA-2876) OX=237561 GN=OCH1 PE=3 SV=1	2	3	0.713536	0.426171	0.18738	1.12	0.899	0.91	0.16	-0.15	-0.14	474.5	380.9	385.4	423.7	5.99	7.01	14.48	9.8	2	High	High	High	High	High	High	High	High	High	High	High	High	474.5	517.9	462.8	420.8	380.9	368.4	312.7	417.9	385.4	423.7	495.5	416.7	1	331.9
High	Master Protein	Q5A6S3	Translation initiation factor eIF2B subunit gamma OS=Candida albicans (strain SC5314 / ATCC MYA-2876) OX=237561 GN=GCD1 PE=4 SV=1	5	8	0.777004	0.088476	0.187745	1.056	0.926	0.904	0.08	-0.11	-0.15	1263.6	1108.2	1081.2	1196.5	4.09	10.78	2.19	4.01	5	High	High	High	High	High	High	High	High	High	High	High	High	1263.6	1335.1	1233.3	1132.6	1108.2	924.6	1104.4	1081.2	1057.2	1179.2	1196.5	1270.9	1	883.8
High	Master Protein	A0A1D8PI22	Pyr_redox_2 domain-containing protein OS=Candida albicans (strain SC5314 / ATCC MYA-2876) OX=237561 GN=orf19.2175 PE=4 SV=1	8	17	0.112482	0.507916	0.187976	1.06	1.046	1.069	0.08	0.06	0.1	2388.2	2356.6	2410.2	2253.9	2.81	1.71	1.81	5.24	8	High	High	High	High	High	High	High	High	High	High	High	High	2373.9	2498.4	2388.2	2356.6	2301.3	2379.5	2430.9	2347.7	2410.2	2253.9	2144.8	2381.5	1	1660.4
High	Master Protein	A0A1D8PHR0	Valyl-tRNA synthetase OS=Candida albicans (strain SC5314 / ATCC MYA-2876) OX=237561 GN=VAS1 PE=3 SV=1	72	304	0.999976	0.761477	0.188412	1.002	1.002	1.014	0	0	0.02	56260.9	56263.4	56942.6	56156.1	0.48	1.15	0.88	1.1	72	High	High	High	High	High	High	High	High	High	High	High	High	55877.2	56394.7	56260.9	56163.6	57334.9	56263.4	57708.1	56942.6	56762.5	56156.1	55550.5	56780.5	1	39083.7
Medium	None	P00711	Alpha-lactalbumin CONTAMINANT OS=Bos taurus GN=LALBA PE=1 SV=2	1	2	0.824804	0.209337	0.189083	1.094	0.832	0.771	0.13	-0.26	-0.38	753.5	573.1	530.9	688.6	3.93	14.58	15.5	6.91	1	High	High	High	High	High	High	High	High	High	High	High	High	706	753.5	758.8	637.6	573.1	475	655.2	530.9	488.6	688.6	728	633.9	1	493.8
High	None	Q59L12	Agglutinin-like protein 3 OS=Candida albicans (strain SC5314 / ATCC MYA-2876) OX=237561 GN=ALS3 PE=1 SV=3	1	1	0.990926	0.281019	0.189957	1.023	1.147	1.113	0.03	0.2	0.15	100.4	112.6	109.3	98.2	4.13	6.48	5.68	6.74	1	High	High	High	High	High	High	High	High	High	High	High	High	106.8	100.4	98.9	116.4	102.5	112.6	119.3	109.3	107.5	95.6	98.2	108.4	1	74.7
High	Master Protein	A0A1D8PE79	Oxysterol-binding protein related protein OS=Candida albicans (strain SC5314 / ATCC MYA-2876) OX=237561 GN=orf19.5095 PE=3 SV=1	22	53	0.994228	0.430621	0.190274	1.006	1.034	1.054	0.01	0.05	0.08	6612.7	6796.4	6929.1	6572.3	1.9	1.62	2.61	1.54	22	High	High	High	High	High	High	High	High	High	High	High	High	6791.2	6612.7	6547.7	6796.4	6686	6905.7	7009	6929.1	6666.1	6572.3	6558.1	6741.3	1	4750.2
High	Master Protein	Q59QB9	Serine/threonine protein kinase OS=Candida albicans (strain SC5314 / ATCC MYA-2876) OX=237561 GN=orf19.399 PE=4 SV=1	8	17	0.57121	0.981383	0.190382	1.029	0.979	0.948	0.04	-0.03	-0.08	2353.6	2240	2168.1	2287.8	1.73	3.61	6.05	3.05	7	High	High	High	High	High	High	High	High	High	High	High	High	2352.9	2353.6	2424.4	2240	2174.6	2336.2	1973.8	2168.1	2215.7	2203.1	2287.8	2340.6	1	1645.8
High	Master Protein	Q59Y46	Morphogenetic regulator of filamentous growth protein 1 OS=Candida albicans (strain SC5314 / ATCC MYA-2876) OX=237561 GN=MFG1 PE=3 SV=2	2	2	0.99996	0.271446	0.190697	0.98	0.909	0.847	-0.03	-0.14	-0.24	352.3	327.1	304.8	359.6	5.47	6.29	11.09	2.72	2	High	High	High	High	High	High	High	High	High	High	High	High	384.9	349.1	352.3	340.6	327.1	300.7	359	304.8	292.6	371.2	359.6	351.7	1	269.2
High	Master Protein	A0A1D8PTA6	Uncharacterized protein OS=Candida albicans (strain SC5314 / ATCC MYA-2876) OX=237561 GN=CAALFM_CR06500CA PE=4 SV=1	5	12	0.997664	0.0155718	0.191116	1.011	1.15	1.105	0.02	0.2	0.14	2094.6	2381.4	2288.6	2071.4	5.23	3.99	5.16	1.98	5	High	High	High	High	High	High	High	High	High	High	High	High	2178.8	1963.3	2094.6	2334.7	2519.8	2381.4	2137.1	2367.1	2288.6	2071.4	2062.4	2138.2	1	1524
High	Master Protein	A0A1D8PN11	Uncharacterized protein OS=Candida albicans (strain SC5314 / ATCC MYA-2876) OX=237561 GN=orf19.577 PE=4 SV=1	10	16	0.589817	0.338987	0.191165	1.052	1.054	1.064	0.07	0.08	0.09	1578.3	1580.5	1595.7	1499.8	3.25	2.95	2.23	2.5	10	High	High	High	High	High	High	High	High	High	High	High	High	1595.5	1578.3	1500.5	1527.3	1580.5	1619.9	1624.8	1554.1	1595.7	1483.2	1499.8	1555.5	1	1116
High	None	A0A1D8PFC2	Uncharacterized protein OS=Candida albicans (strain SC5314 / ATCC MYA-2876) OX=237561 GN=orf19.5282 PE=4 SV=1	1	2	0.157287	0.981277	0.192373	0.886	0.999	1.111	-0.17	0	0.15	561	632.5	703.5	633.1	7.58	7.62	5.99	0.89	1	High	High	High	High	High	High	High	High	High	High	High	High	604.3	519.2	561	632.5	698.8	602.9	703.5	751.9	667.3	633.1	625.5	636.5	1	422.7
High	Master Protein	Q5A331	AAA family ATPase OS=Candida albicans (strain SC5314 / ATCC MYA-2876) OX=237561 GN=CAALFM_CR08590WA PE=4 SV=1	9	14	0.99999	0.910284	0.192631	1.006	1.02	1.077	0.01	0.03	0.11	797.3	808.4	853.5	792.7	2.09	2.67	4.53	1.78	8	High	High	High	High	High	High	High	High	High	High	High	High	808.3	797.3	775.7	783.5	808.4	826.4	853.5	866.1	795	779.3	792.7	807.5	1	565.4
High	Master Protein	Q5AJC1	Vacuolar protein-sorting protein BRO1 OS=Candida albicans (strain SC5314 / ATCC MYA-2876) OX=237561 GN=BRO1 PE=3 SV=2	5	8	0.0161653	0.631911	0.194053	1.106	0.978	0.956	0.14	-0.03	-0.07	2304.8	2039.5	1992.1	2084.4	4.07	1.65	3.86	0.58	4	High	High	High	High	High	High	High	High	High	High	High	High	2204.4	2304.8	2391.2	1988.5	2039.5	2051.6	2047.2	1992.1	1896.4	2084.4	2099.9	2075.9	1	1541.9
High	Master Protein	A0A1D8PT83	Uncharacterized protein OS=Candida albicans (strain SC5314 / ATCC MYA-2876) OX=237561 GN=CAALFM_CR06510WA PE=4 SV=1	6	19	0.996287	0.000964228	0.194297	0.994	1.248	1.085	-0.01	0.32	0.12	1266.2	1590.3	1382.3	1274	3.66	6.48	1.83	4.55	6	High	High	High	High	High	High	High	High	High	High	High	High	1330.8	1239.7	1266.2	1590.3	1741.2	1538.9	1425.7	1380.6	1382.3	1239.4	1274	1353.8	1	930.8
High	Master Protein	A0A1D8PGP5	Succinate dehydrogenase assembly factor 4, mitochondrial OS=Candida albicans (strain SC5314 / ATCC MYA-2876) OX=237561 GN=orf19.1588 PE=3 SV=1	7	28	0.97271	0.887143	0.194856	0.975	0.994	0.944	-0.04	-0.01	-0.08	3891.9	3966	3765.1	3990.4	1.85	1.17	2.95	4	7	High	High	High	High	High	High	High	High	High	High	High	High	3941.8	3891.9	3800.1	3966	3938.7	4029.3	3600.9	3765.1	3809.4	3990.4	3736.6	4022.7	1	2757.1
High	Master Protein	A0A1D8PF22	Dolichyl-diphosphooligosaccharide--protein glycosyltransferase subunit WBP1 OS=Candida albicans (strain SC5314 / ATCC MYA-2876) OX=237561 GN=WBP1 PE=3 SV=1	20	60	0.999922	0.378878	0.194951	1.005	1.027	1.028	0.01	0.04	0.04	11220.8	11471	11483	11169.5	1.71	1.68	3.07	1.34	20	High	High	High	High	High	High	High	High	High	High	High	High	11250.3	10906.3	11220.8	11263.5	11649.3	11471	11953.3	11257	11483	10973.7	11265.8	11169.5	1	7869.1
High	Master Protein	A0A1D8PTX3	Protein-lysine N-methyltransferase OS=Candida albicans (strain SC5314 / ATCC MYA-2876) OX=237561 GN=CAALFM_CR09310WA PE=3 SV=1	7	10	0.314	0.682312	0.196852	0.96	1.026	1.062	-0.06	0.04	0.09	1185	1266.6	1311	1234.5	3.81	2.56	5.18	2.58	7	High	High	High	High	High	High	High	High	High	High	High	High	1206.6	1120.9	1185	1266.6	1257.7	1318.5	1311	1263.8	1399	1208.1	1271.6	1234.5	1	844
High	Master Protein	A0A1D8PRY4	Cwh43p OS=Candida albicans (strain SC5314 / ATCC MYA-2876) OX=237561 GN=CWH43 PE=4 SV=1	6	28	0.362262	0.968645	0.197007	1.029	0.983	0.946	0.04	-0.02	-0.08	4153.9	3967.2	3817.3	4034.9	0.76	3.06	2.7	2.87	6	High	High	High	High	High	High	High	High	High	High	High	High	4153.9	4161.4	4103.3	3831.3	3967.2	4073	3817.3	3915.7	3709.5	3864.1	4034.9	4081.9	1	2905.5
High	Master Protein	A0A1D8PJC7	Uncharacterized protein OS=Candida albicans (strain SC5314 / ATCC MYA-2876) OX=237561 GN=orf19.1637 PE=4 SV=1	1	1	0.99933	0.839964	0.197417	1.064	1.106	0.915	0.09	0.15	-0.13	95	98.7	81.7	89.3	5.99	8.68	5.23	7.18	1	High	High	High	High	High	High	High	High	High	High	High	High	97.7	95	87	88	98.7	104.7	85.9	77.4	81.7	88.3	89.3	100.3	1	68.3
Low	Master Protein	A0A1D8PH55	4-aminobutyrate aminotransferase OS=Candida albicans (strain SC5314 / ATCC MYA-2876) OX=237561 GN=UGA1 PE=3 SV=1	1	1	0.381493	0.999981	0.198003	1.18	1.049	0.858	0.24	0.07	-0.22	548.9	488	399	465.3	9.83	9.56	5.25	14.23	1	High	High	High	High	High	High	High	High	High	High	High	High	484.8	590.4	548.9	416.2	488	498.2	399	364.6	400.6	465.3	406.4	540	1	339.1
High	Master Protein	A0A1D8PNG1	Uncharacterized protein OS=Candida albicans (strain SC5314 / ATCC MYA-2876) OX=237561 GN=orf19.4250 PE=4 SV=1	2	2	0.658533	0.152455	0.198045	1.097	1.138	1.152	0.13	0.19	0.2	153.4	159.1	161.1	139.8	10.1	8.12	7.11	2.94	2	High	High	High	High	High	High	High	High	High	High	High	High	163.4	153.4	133.6	159.1	150.3	176.2	161.1	148	170.6	139.8	134.8	142.9	1	114.3
High	Master Protein	A0A1D8PSB0	AP-1 complex subunit gamma OS=Candida albicans (strain SC5314 / ATCC MYA-2876) OX=237561 GN=APL4 PE=3 SV=1	11	23	0.999962	0.875711	0.198577	0.984	0.98	0.951	-0.02	-0.03	-0.07	2472.7	2464.2	2391	2513.5	0.42	2.79	2.13	3.49	11	High	High	High	High	High	High	High	High	High	High	High	High	2460.5	2481.3	2472.7	2359.7	2487.2	2464.2	2306.7	2396.4	2391	2535.1	2376	2513.5	1	1721
High	Master Protein	A0A1D8PUC4	Derlin OS=Candida albicans (strain SC5314 / ATCC MYA-2876) OX=237561 GN=CAALFM_CR10810CA PE=3 SV=1	4	7	0.977839	0.329387	0.19867	0.992	1.088	1.073	-0.01	0.12	0.1	506.8	555.9	548.4	511	3.72	1.55	7.09	3.45	4	High	High	High	High	High	High	High	High	High	High	High	High	533.9	497.1	506.8	562.6	555.9	545.5	533	608.6	548.4	508	540.5	511	1	373.4
High	Master Protein	A0A1D8PPA5	Het1p OS=Candida albicans (strain SC5314 / ATCC MYA-2876) OX=237561 GN=HET1 PE=4 SV=1	17	93	1	0.0749407	0.199393	1	1.043	1.043	0	0.06	0.06	20505.6	21395.9	21382.7	20507.9	1.12	1.84	2.69	1.18	17	High	High	High	High	High	High	High	High	High	High	High	High	20348.6	20505.6	20800.7	21395.9	21111.9	21891	20617.4	21382.7	21736.4	20507.9	20814.2	20336.6	1	14233
High	Master Protein	A0A1D8PIB2	Asparagine synthase (Glutamine-hydrolyzing) 2 OS=Candida albicans (strain SC5314 / ATCC MYA-2876) OX=237561 GN=ASN1 PE=4 SV=1	49	300	0.941031	0.932642	0.199839	0.983	1.003	1.03	-0.03	0	0.04	73068.5	74538.8	76584.4	74351	2.24	2.07	1.7	1.43	49	High	High	High	High	High	High	High	High	High	High	High	High	71689.3	74958.9	73068.5	74538.8	76093.3	73005.5	77642.4	76584.4	75059.8	74351	72657.2	74592.4	1	50143.5
High	Master Protein	Q59ZI9	Casein kinase 2 catalytic subunit OS=Candida albicans (strain SC5314 / ATCC MYA-2876) OX=237561 GN=CKA2 PE=3 SV=1	13	41	0.809393	0.730521	0.200266	1.012	0.996	1.011	0.02	-0.01	0.02	5908.7	5814.2	5904.3	5840.1	0.43	0.95	1.66	0.45	13	High	High	High	High	High	High	High	High	High	High	High	High	5911.1	5865.9	5908.7	5742.8	5851	5814.2	5904.3	6074	5900.8	5840.1	5834.2	5882.7	1	4134.6
High	Master Protein	A0A1D8PJC1	Tom6p OS=Candida albicans (strain SC5314 / ATCC MYA-2876) OX=237561 GN=TOM6 PE=4 SV=1	2	11	0.956679	0.651808	0.200983	1.093	0.948	0.823	0.13	-0.08	-0.28	2486.8	2157.5	1871.5	2275.1	5.44	18.67	14.54	6.76	2	High	High	High	High	High	High	High	High	High	High	High	High	2313.2	2576.4	2486.8	2425.8	2157.5	1660	1582.5	2122.7	1871.5	2213	2512	2275.1	1	1618
High	Master Protein	Q5AHD5	Cap4p OS=Candida albicans (strain SC5314 / ATCC MYA-2876) OX=237561 GN=CAP4 PE=4 SV=1	2	3	0.977856	0.550193	0.201821	1.036	0.944	0.882	0.05	-0.08	-0.18	815.2	742.6	693.9	786.8	3.1	5.57	8.43	3.16	2	High	High	High	High	High	High	High	High	High	High	High	High	837.4	787.1	815.2	798.7	742.6	716.7	688	796.8	693.9	782.4	786.8	828.2	1	585.7
High	Master Protein	A0A1D8PH92	Uncharacterized protein OS=Candida albicans (strain SC5314 / ATCC MYA-2876) OX=237561 GN=orf19.3535 PE=4 SV=1	2	6	0.999521	0.164836	0.202426	0.995	1.072	1.132	-0.01	0.1	0.18	853.5	919.2	971.2	857.6	3.5	6.86	5.86	3.3	2	High	High	High	High	High	High	High	High	High	High	High	High	887.4	853.5	827.7	919.2	905.3	1024.4	979.2	879.7	971.2	833	857.6	889.5	1	620.7
High	Master Protein	A0A1D8PGI8	Phospho-2-dehydro-3-deoxyheptonate aldolase OS=Candida albicans (strain SC5314 / ATCC MYA-2876) OX=237561 GN=ARO3 PE=3 SV=1	21	118	0.813377	0.85457	0.202775	0.949	1.054	1.099	-0.08	0.08	0.14	18013.5	20006.3	20866.6	18979.2	4.54	5.14	6.6	1.94	18	High	High	High	High	High	High	High	High	High	High	High	High	19113.5	17493	18013.5	20097.2	20006.3	18321.1	21825	20866.6	19141.4	19134.9	18979.2	18438.2	1	13369.1
High	Master Protein	A0A1D8PMA9	Uncharacterized protein OS=Candida albicans (strain SC5314 / ATCC MYA-2876) OX=237561 GN=orf19.1791 PE=4 SV=1	6	22	0.99965	0.71226	0.203005	1.006	1.017	1.041	0.01	0.02	0.06	1707.6	1725.6	1766.5	1696.8	2.66	3.01	1.42	1.37	6	High	High	High	High	High	High	High	High	High	High	High	High	1665.1	1755.9	1707.6	1697.1	1798.5	1725.6	1766.5	1756.7	1804.5	1696.8	1689.1	1732.8	1	1164.6
High	Master Protein	Q5A8I8	Induced during hyphae development protein 1 OS=Candida albicans (strain SC5314 / ATCC MYA-2876) OX=237561 GN=IHD1 PE=1 SV=1	1	2	0.399729	0.212294	0.203947	1.131	1.146	1.186	0.18	0.2	0.25	284	287.8	297.7	251	3.47	2.15	11.84	4.21	1	High	High	High	High	High	High	High	High	High	High	High	High	284	286.4	268.5	287.8	293.4	281	251.5	318.4	297.7	251	247.2	267.4	1	198.6
High	Master Protein	A0A1D8PN92	Myosin 1 OS=Candida albicans (strain SC5314 / ATCC MYA-2876) OX=237561 GN=MYO1 PE=3 SV=1	4	6	0.736109	0.977086	0.204423	0.974	1.014	1.038	-0.04	0.02	0.05	497.6	518.1	530.6	510.9	2.99	2.8	3.18	2.44	3	High	High	High	High	High	High	High	High	High	High	High	High	479.6	497.6	508.9	522.7	518.1	495.9	530.6	519.5	552.8	493.7	510.9	517.7	1	335.4
High	Master Protein	A0A1D8PM44	Methylenetetrahydrofolate dehydrogenase (NAD(+)) OS=Candida albicans (strain SC5314 / ATCC MYA-2876) OX=237561 GN=orf19.3810 PE=4 SV=1	13	34	0.999952	0.408286	0.204685	1.015	1.084	1.12	0.02	0.12	0.16	5938.2	6339	6549.4	5848	0.64	4.47	8.49	4.05	13	High	High	High	High	High	High	High	High	High	High	High	High	5968.3	5938.2	5893.4	6119.9	6339	6686.1	5985.4	6549.4	7096.3	5775.1	5848	6223.8	1	4174.6
Medium	Master Protein	A0A1D8PLH5	Uncharacterized protein OS=Candida albicans (strain SC5314 / ATCC MYA-2876) OX=237561 GN=orf19.4575 PE=3 SV=1	1	2	0.614582	0.764424	0.205781	1.151	0.944	0.862	0.2	-0.08	-0.21	337.8	277.1	253	293.6	13.45	3.55	9.66	9.37	1	High	High	High	High	High	High	High	High	High	High	High	High	292.6	383.5	337.8	277.1	275.2	293.4	234.5	253	283.6	293.6	284.3	337.8	1	204.6
High	Master Protein	Q59SS1	Ccc1p OS=Candida albicans (strain SC5314 / ATCC MYA-2876) OX=237561 GN=CCC1 PE=3 SV=1	8	45	0.978572	0.652578	0.206247	0.981	0.959	0.934	-0.03	-0.06	-0.1	12258.4	11983.6	11669.5	12491.2	1.56	4.02	4.81	2.44	8	High	High	High	High	High	High	High	High	High	High	High	High	12345.8	12258.4	11980.7	11983.6	12379.1	11424.4	11007.3	12115.5	11669.5	11985	12519.1	12491.2	1	8635.3
High	Master Protein	A0A1D8PMK0	Ago1p OS=Candida albicans (strain SC5314 / ATCC MYA-2876) OX=237561 GN=AGO1 PE=3 SV=1	1	1	0.345955	0.999964	0.206421	1.126	0.981	0.896	0.17	-0.03	-0.16	240.5	209.7	191.4	213.7	5.96	9.77	6.48	2.14	1	High	High	High	High	High	High	High	High	High	High	High	High	219.6	246.3	240.5	209.7	195	236.2	201.2	176.8	191.4	208.8	218	213.7	1	153.6
High	Master Protein	Q5AND0	Prohibitin OS=Candida albicans (strain SC5314 / ATCC MYA-2876) OX=237561 GN=PHB2 PE=3 SV=1	18	55	0.678045	0.701155	0.207056	0.971	0.973	0.917	-0.04	-0.04	-0.13	11105.7	11132.1	10481.6	11436.2	6.4	4.77	6.26	0.57	18	High	High	High	High	High	High	High	High	High	High	High	High	11559	11105.7	10183.9	11132.1	11378.6	10374.8	9823.5	11135.7	10481.6	11436.2	11423.4	11542.8	1	8085
High	Master Protein	A0A1D8PP73	DNA primase OS=Candida albicans (strain SC5314 / ATCC MYA-2876) OX=237561 GN=orf19.4030 PE=3 SV=1	7	13	0.998762	0.148051	0.20894	0.991	0.957	0.958	-0.01	-0.06	-0.06	1148.8	1109.6	1111	1159.2	0.97	2.15	1.96	2	7	High	High	High	High	High	High	High	High	High	High	High	High	1134.9	1156.7	1148.8	1131.7	1109.6	1084.1	1111	1135.1	1091.7	1165.9	1123.2	1159.2	1	793.8
High	Master Protein	A0A1D8PSF9	Uncharacterized protein OS=Candida albicans (strain SC5314 / ATCC MYA-2876) OX=237561 GN=CAALFM_CR03430WA PE=4 SV=1	1	2	0.999391	0.497478	0.209176	0.952	1.145	1.301	-0.07	0.2	0.38	227.4	273.7	310.9	239	6.86	15.85	12.54	3.04	1	High	High	High	High	High	High	High	High	High	High	High	High	254	224.9	227.4	229.7	273.7	316.3	248.3	311.9	310.9	229.8	239	244.1	1	177.7
High	Master Protein	Q5AEN6	Mediator of RNA polymerase II transcription subunit 7 OS=Candida albicans (strain SC5314 / ATCC MYA-2876) OX=237561 GN=MED7 PE=3 SV=1	2	4	0.924357	0.7173	0.209324	0.972	1.034	1.113	-0.04	0.05	0.16	407.8	434	467.1	419.5	3.71	9.48	11.58	2.96	1	High	High	High	High	High	High	High	High	High	High	High	High	419.8	389.9	407.8	421.5	434	501.2	467.1	440.9	548.7	435.2	410.6	419.5	1	293.6
High	Master Protein	Q59LC9	Protein AF-9 homolog OS=Candida albicans (strain SC5314 / ATCC MYA-2876) OX=237561 GN=YAF9 PE=3 SV=1	3	3	0.970742	0.633165	0.20965	0.992	1.02	1.063	-0.01	0.03	0.09	509.1	523.8	545.9	513.4	1.38	2.92	6.22	1.37	3	High	High	High	High	High	High	High	High	High	High	High	High	512.9	509.1	499.3	550.2	523.8	522.8	545.9	514.8	582.8	506.6	513.4	520.7	1	358.8
High	Master Protein	Q5A500	Adenylyl-sulfate kinase OS=Candida albicans (strain SC5314 / ATCC MYA-2876) OX=237561 GN=MET14 PE=3 SV=1	12	46	0.999506	0.295314	0.210275	1.015	0.957	0.974	0.02	-0.06	-0.04	9222.5	8692.6	8848.2	9087.4	2.33	3.2	2.35	2.95	12	High	High	High	High	High	High	High	High	High	High	High	High	8910.8	9222.5	9319.2	9108.9	8692.6	8573.9	8502.5	8848.2	8868.2	9087.4	9476.9	8957.4	1	6232.7
High	Master Protein	A0A1D8PTQ2	Decapping enzyme complex catalytic subunit OS=Candida albicans (strain SC5314 / ATCC MYA-2876) OX=237561 GN=DCP2 PE=3 SV=1	21	42	0.235311	0.902494	0.210285	1.029	1.012	0.948	0.04	0.02	-0.08	4722.2	4644.2	4348.9	4588.5	0.5	1.76	2.37	2.65	21	High	High	High	High	High	High	High	High	High	High	High	High	4738.4	4722.2	4692.1	4517.8	4669.5	4644.2	4332.7	4521	4348.9	4427.7	4588.5	4664.6	1	3314.3
High	Master Protein	Q59RK1	Putative Rab GTPase-binding protein OS=Candida albicans (strain SC5314 / ATCC MYA-2876) OX=237561 GN=SRO77 PE=3 SV=1	4	4	0.767323	0.999507	0.210352	1.037	0.995	0.906	0.05	-0.01	-0.14	737.6	707.5	643.9	711	4.25	2.54	6.61	4.51	4	High	High	High	High	High	High	High	High	High	High	High	High	755.2	737.6	695	678.9	711.3	707.5	605.3	690.6	643.9	729	667.4	711	1	528.3
Low	Master Protein	A0A1D8PLX6	UBX domain-containing protein OS=Candida albicans (strain SC5314 / ATCC MYA-2876) OX=237561 GN=orf19.1595 PE=4 SV=1	1	1	0.573129	0.901519	0.211829	1.091	0.989	0.934	0.13	-0.02	-0.1	198.8	180.1	170.1	182.2	2.79	7.41	9.53	3	1	High	High	High	High	High	High	High	High	High	High	High	High	198.8	199.4	189.7	187.2	180.1	161.9	174.1	170.1	145.4	182.2	177.4	188.3	1	139
High	Master Protein	A0A1D8PLW8	Proteasome regulatory particle lid subunit OS=Candida albicans (strain SC5314 / ATCC MYA-2876) OX=237561 GN=RPN6 PE=3 SV=1	33	97	0.89307	0.458601	0.212277	1.01	0.987	0.976	0.01	-0.02	-0.04	17553.2	17149.3	16953.6	17379.4	0.27	0.35	1.85	1.73	33	High	High	High	High	High	High	High	High	High	High	High	High	17538.7	17553.2	17628.2	17114.2	17230.6	17149.3	17408.7	16801.8	16953.6	17182.3	17379.4	17776.5	1	12267.6
High	Master Protein	Q5A044	MICOS complex subunit MIC60 OS=Candida albicans (strain SC5314 / ATCC MYA-2876) OX=237561 GN=MIC60 PE=3 SV=2	40	150	0.51483	0.0720005	0.213457	0.985	0.973	0.975	-0.02	-0.04	-0.04	29321.6	28967.2	29035.3	29770.4	0.72	1.6	1.26	0.64	38	High	High	High	High	High	High	High	High	High	High	High	High	29666	29280.7	29321.6	28967.2	29508	28585.6	28997.6	29651.4	29035.3	29643.7	30021.4	29770.4	1	20750.1
High	Master Protein	A0A1D8PSG5	Isoleucyl-tRNA synthetase OS=Candida albicans (strain SC5314 / ATCC MYA-2876) OX=237561 GN=CAALFM_CR03400WA PE=3 SV=1	9	13	0.194854	0.586181	0.213839	1.048	0.969	0.96	0.07	-0.05	-0.06	2545.9	2353.7	2331.5	2429.1	2.69	1.58	2.79	2.47	9	High	High	High	High	High	High	High	High	High	High	High	High	2474.9	2611.5	2545.9	2353.7	2415	2346.7	2267.6	2397.6	2331.5	2376.7	2429.1	2496.5	1	1731.1
High	Master Protein	Q59T44	40S ribosomal protein S8 OS=Candida albicans (strain SC5314 / ATCC MYA-2876) OX=237561 GN=RPS8A PE=3 SV=1	21	341	0.14775	0.889336	0.213867	0.96	1.03	1.063	-0.06	0.04	0.09	48035.5	51526.5	53187.8	50025.2	1.23	1.57	1.45	5.04	21	High	High	High	High	High	High	High	High	High	High	High	High	48035.5	48191.4	47108.5	50442.9	52017.6	51526.5	53740.9	52219.9	53187.8	53304.2	48291.7	50025.2	1	33598.8
High	Master Protein	Q59W44	Mitochondrial import inner membrane translocase subunit TIM50 OS=Candida albicans (strain SC5314 / ATCC MYA-2876) OX=237561 GN=TIM50 PE=3 SV=1	24	111	0.899591	0.078545	0.215375	1.006	0.961	0.961	0.01	-0.06	-0.06	23364.6	22327.1	22330.5	23231.3	2.75	2.48	1.8	1.07	24	High	High	High	High	High	High	High	High	High	High	High	High	22926.5	24198.9	23364.6	22327.1	22464.9	21455.6	22330.5	22778.5	21974.9	22955.4	23452.9	23231.3	1	16036.1
High	Master Protein	P0CH67	Lipoyl synthase, mitochondrial OS=Candida albicans (strain SC5314 / ATCC MYA-2876) OX=237561 GN=LAB5 PE=3 SV=1	10	22	0.896864	0.300177	0.215488	0.954	1.034	1.033	-0.07	0.05	0.05	2413	2616.7	2613.1	2529.9	2.15	5.84	3.82	4.86	10	High	High	High	High	High	High	High	High	High	High	High	High	2454.2	2413	2351.3	2503.2	2616.7	2808.5	2600.2	2613.1	2782.7	2544.7	2330.1	2529.9	1	1716.6
High	Master Protein	Q5AD28	Phenylalanyl-tRNA synthetase OS=Candida albicans (strain SC5314 / ATCC MYA-2876) OX=237561 GN=MSF1 PE=3 SV=1	11	17	0.812774	0.688306	0.215946	1.027	0.98	0.93	0.04	-0.03	-0.11	3159.1	3013.2	2858.1	3074.8	2.5	2.52	7.13	3.43	11	High	High	High	High	High	High	High	High	High	High	High	High	3137.3	3285	3159.1	3013.2	3023.9	2888.8	2675.7	3084.7	2858.1	3001.9	3074.8	3211.3	1	2194.4
High	Master Protein	A0A1D8PI15	Ribosomal 40S subunit protein S10A OS=Candida albicans (strain SC5314 / ATCC MYA-2876) OX=237561 GN=RPS10 PE=4 SV=1	12	109	0.922422	0.0814839	0.216304	1.018	0.934	0.96	0.03	-0.1	-0.06	29138.8	26717.8	27454.9	28613.1	2.19	2.32	0.37	3.25	12	High	High	High	High	High	High	High	High	High	High	High	High	28157.7	29138.8	29341.2	27788.5	26683.1	26717.8	27301.9	27454.9	27494	28613.1	29447.8	27593.6	1	19695.1
High	Master Protein	Q59PZ6	6-phosphogluconolactonase-like protein OS=Candida albicans (strain SC5314 / ATCC MYA-2876) OX=237561 GN=SOL3 PE=3 SV=1	20	67	0.951292	0.230443	0.2167	1.013	1.028	1.052	0.02	0.04	0.07	10867.3	11038.2	11290.6	10733	0.9	3.96	3.98	1.6	20	High	High	High	High	High	High	High	High	High	High	High	High	10916.7	10728	10867.3	10973.9	11038.2	11775.6	11290.6	10818.5	11716.8	10857.1	10518.1	10733	1	7635.7
High	Master Protein	Q59X24	Exopolyphosphatase OS=Candida albicans (strain SC5314 / ATCC MYA-2876) OX=237561 GN=orf19.4107 PE=4 SV=1	8	14	0.802422	0.99844	0.216872	1.029	1.004	1.042	0.04	0.01	0.06	1435.1	1400.6	1453.4	1395.1	4.26	1.17	2.24	3.27	8	High	High	High	High	High	High	High	High	High	High	High	High	1484.9	1363.8	1435.1	1400.6	1418.3	1385.6	1509	1453.4	1450.7	1395.1	1351.5	1442.9	1	1038.6
Medium	Master Protein	A0A1D8PF73	EngB-type G domain-containing protein OS=Candida albicans (strain SC5314 / ATCC MYA-2876) OX=237561 GN=orf19.1163 PE=4 SV=1	1	1	0.99997	0.440836	0.218225	1.079	1.206	1.313	0.11	0.27	0.39	496.1	554.5	603.7	459.8	6.65	19.88	9.88	8.57	1	High	High	High	High	High	High	High	High	High	High	High	High	496.1	502.7	444.3	694.2	554.5	468.8	657.6	603.7	539.2	459.8	531.4	459.4	1	347
High	Master Protein	Q5AK02	Mitochondrial 37S ribosomal protein RSM7 OS=Candida albicans (strain SC5314 / ATCC MYA-2876) OX=237561 GN=orf19.4018 PE=3 SV=1	18	52	0.999837	0.999595	0.218535	0.991	0.986	1.032	-0.01	-0.02	0.05	8849.5	8797.8	9213.8	8925.5	0.87	2.83	0.83	2.76	18	High	High	High	High	High	High	High	High	High	High	High	High	8981.9	8849.5	8846.5	8754.2	9211.4	8797.8	9213.8	9314.5	9163.9	8925.5	8650.6	9141.4	1	6282.4
High	Master Protein	A0A1D8PCV8	Uncharacterized protein OS=Candida albicans (strain SC5314 / ATCC MYA-2876) OX=237561 GN=RSC2 PE=4 SV=1	18	45	0.943827	0.726462	0.219377	1.027	0.981	0.958	0.04	-0.03	-0.06	8121.4	7757.2	7574.2	7910.3	1.04	4.35	1.58	3.9	18	High	High	High	High	High	High	High	High	High	High	High	High	8033.3	8121.4	8201.9	7493.4	7757.2	8166.7	7482.2	7720.6	7574.2	7763	8362.5	7910.3	1	5618.9
High	Master Protein	A0A1D8PH84	Uncharacterized protein OS=Candida albicans (strain SC5314 / ATCC MYA-2876) OX=237561 GN=orf19.154 PE=4 SV=1	5	13	0.301912	0.602558	0.219537	0.932	1.025	1.05	-0.1	0.04	0.07	1800.1	1979	2028.7	1931.2	3.04	1.21	4.17	3.85	5	High	High	High	High	High	High	High	High	High	High	High	High	1800.1	1887.3	1784.2	2010.8	1979	1963.9	2118.6	1949.4	2028.7	1839.8	1931.2	1986.1	1	1259.1
High	Master Protein	A0A1D8PLG7	Uncharacterized protein OS=Candida albicans (strain SC5314 / ATCC MYA-2876) OX=237561 GN=orf19.4570 PE=4 SV=1	1	1	0.0299466	0.842582	0.22052	1.156	0.989	1.114	0.21	-0.02	0.16	171.1	146.4	164.8	148	3.76	2.55	7.64	3.34	1	High	High	High	High	High	High	High	High	High	High	High	High	166	178.8	171.1	140.6	147.5	146.4	149.5	174.2	164.8	155.2	145.6	148	1	116.1
High	Master Protein	A0A1D8PGL6	Ent3p OS=Candida albicans (strain SC5314 / ATCC MYA-2876) OX=237561 GN=ENT3 PE=4 SV=1	14	52	0.00252443	0.898458	0.221067	1.045	0.997	0.987	0.06	0	-0.02	11912.3	11374.5	11258.9	11403.8	1.44	0.5	0.25	0.56	14	High	High	High	High	High	High	High	High	High	High	High	High	11671.5	12002.7	11912.3	11321.1	11434.7	11374.5	11242.9	11297.6	11258.9	11383	11502.2	11403.8	1	8163.7
High	Master Protein	A0A1D8PFW8	tRNA-5-taurinomethyluridine 2-sulfurtransferase OS=Candida albicans (strain SC5314 / ATCC MYA-2876) OX=237561 GN=orf19.7245 PE=3 SV=1	1	1	0.576096	0.75212	0.221822	1.172	0.878	0.776	0.23	-0.19	-0.37	188.5	141.2	124.9	160.9	25.06	14.34	14.42	4.51	1	High	High	High	High	High	High	High	High	High	High	High	High	253.7	188.5	155.6	141.2	167	126	142.7	124.9	106.7	160.9	159	172.6	1	177.4
High	Master Protein	Q5ABB8	HSP70/90 family co-chaperone OS=Candida albicans (strain SC5314 / ATCC MYA-2876) OX=237561 GN=CNS1 PE=3 SV=1	19	62	0.921998	0.262391	0.223046	1.007	0.991	0.977	0.01	-0.01	-0.03	10371.9	10201.9	10056.4	10297.1	0.77	2.02	0.86	0.34	19	High	High	High	High	High	High	High	High	High	High	High	High	10296.9	10455.8	10371.9	9883.4	10264.9	10201.9	10056.4	10050.3	10203.8	10288.1	10297.1	10352.8	1	7202.2
Low	Master Protein	Q9UW24	Phosphatidylinositol 4-kinase PIK1a OS=Candida albicans (strain SC5314 / ATCC MYA-2876) OX=237561 GN=PIKA PE=3 SV=1	1	5	0.100554	0.999508	0.223764	1.197	0.994	0.854	0.26	-0.01	-0.23	1217.4	1011.5	868.8	1017.3	12.83	9.77	4.2	7.27	1	High	High	High	High	High	High	High	High	High	High	High	High	1103.9	1419.7	1217.4	911.1	1011.5	1108.6	831.3	868.8	904.2	1017.3	943.1	1090.9	1	772.1
High	Master Protein	Q5AK43	Uncharacterized protein OS=Candida albicans (strain SC5314 / ATCC MYA-2876) OX=237561 GN=orf19.3977 PE=4 SV=1	11	37	0.798003	0.481695	0.224117	1.003	1.021	1.032	0	0.03	0.05	6008.7	6117.3	6183.9	5990.1	1.75	2.7	1.24	0.65	11	High	High	High	High	High	High	High	High	High	High	High	High	5975.4	6173.3	6008.7	5932.8	6117.3	6262.2	6218.6	6072.1	6183.9	5990.1	5928.6	6000.3	1	4179.6
High	Master Protein	Q5AFA2	Extracellular glycosidase CRH11 OS=Candida albicans (strain SC5314 / ATCC MYA-2876) OX=237561 GN=CRH11 PE=1 SV=1	7	11	0.937225	0.956124	0.22497	1.007	1.002	0.938	0.01	0	-0.09	1685.1	1677	1570	1673.4	2.8	4.25	2.84	1.74	7	High	High	High	High	High	High	High	High	High	High	High	High	1685.1	1747.1	1653.7	1630.1	1771.5	1677	1551.3	1636.8	1570	1641	1673.4	1699	1	1178.6
High	Master Protein	A0A1D8PU67	Proteasome endopeptidase complex OS=Candida albicans (strain SC5314 / ATCC MYA-2876) OX=237561 GN=PUP1 PE=4 SV=1	9	40	0.979605	0.913337	0.22552	1.003	0.997	0.954	0	0	-0.07	7166.6	7121.5	6815.8	7143	1.34	4.84	1.24	1.53	9	High	High	High	High	High	High	High	High	High	High	High	High	7166.6	7066.2	7257.5	7272.7	7121.5	6624	6815.8	6831.3	6678.4	7185.8	6979.7	7143	1	5012.7
Low	Master Protein	A0A1D8PDI0	Uncharacterized protein OS=Candida albicans (strain SC5314 / ATCC MYA-2876) OX=237561 GN=orf19.432 PE=4 SV=1	1	1	0.321976	0.0713224	0.228356	0.907	1.201	1.143	-0.14	0.26	0.19	194.1	257.1	244.5	214	8.58	5.21	11.03	3.2	1	High	High	High	High	High	High	High	High	High	High	High	High	194.1	201.7	170.7	241	257.1	267.4	215.2	268.6	244.5	217	214	204.1	1	135.8
High	None	A0A1D8PTZ2	Uncharacterized protein OS=Candida albicans (strain SC5314 / ATCC MYA-2876) OX=237561 GN=CAALFM_CR09490WA PE=4 SV=1	1	3	0.622214	0.126961	0.228396	1.107	1.2	1.148	0.15	0.26	0.2	595.8	645.4	617.7	538	2.58	5.44	4.84	7.76	1	High	High	High	High	High	High	High	High	High	High	High	High	576	595.8	606.1	589.1	650.8	645.4	585.9	645.5	617.7	535.3	538	612.2	1	402.9
High	Master Protein	A0A1D8PDE3	Coatomer subunit gamma OS=Candida albicans (strain SC5314 / ATCC MYA-2876) OX=237561 GN=SEC21 PE=3 SV=1	39	130	0.97149	0.198416	0.228571	0.998	1.023	1.027	0	0.03	0.04	17943	18387.4	18463.5	17976.5	0.31	3.06	1.78	1.69	39	High	High	High	High	High	High	High	High	High	High	High	High	17943	17940.1	18038.7	18000.9	18387.4	19115.7	18795.5	18139.5	18463.5	17976.5	17508.2	18071	1	12550.3
High	Master Protein	Q59PZ1	Proteasome core particle subunit alpha 5 OS=Candida albicans (strain SC5314 / ATCC MYA-2876) OX=237561 GN=PUP2 PE=3 SV=1	15	56	0.750217	0.781865	0.228809	1.017	0.982	0.954	0.03	-0.03	-0.07	10824.5	10449.6	10151.9	10638.5	0.8	2.76	5.67	2.49	15	High	High	High	High	High	High	High	High	High	High	High	High	10816.1	10971.5	10824.5	10449.6	10459.4	9963.5	9332.7	10417.3	10151.9	10277.8	10789.3	10638.5	1	7565.4
High	Master Protein	A0A1D8PKP8	Uncharacterized protein OS=Candida albicans (strain SC5314 / ATCC MYA-2876) OX=237561 GN=orf19.6786 PE=4 SV=1	2	3	0.762753	0.999997	0.230069	1.014	0.985	0.831	0.02	-0.02	-0.27	653.9	634.8	535.6	644.7	4.07	4.93	9.56	5.89	2	High	High	High	High	High	High	High	High	High	High	High	High	639.8	691.9	653.9	634.8	594.6	655.5	531.3	535.6	626.9	655.9	586.8	644.7	1	447.5
High	Master Protein	P83778	Malate dehydrogenase, cytoplasmic OS=Candida albicans (strain SC5314 / ATCC MYA-2876) OX=237561 GN=MDH1 PE=1 SV=2	19	68	0.784196	0.50874	0.230453	0.983	1.033	1.065	-0.02	0.05	0.09	11989.5	12602	12992.6	12194.7	1.99	6.12	3.9	1.82	19	High	High	High	High	High	High	High	High	High	High	High	High	12152.6	11684	11989.5	12272.8	12602	13772.7	12719.2	12992.6	13712.5	12194.7	12146.5	12555.9	1	8500.2
High	Master Protein	A0A1D8PPK7	RING-type E3 ubiquitin transferase OS=Candida albicans (strain SC5314 / ATCC MYA-2876) OX=237561 GN=orf19.3449 PE=4 SV=1	8	13	0.887936	0.988136	0.230466	0.989	1.024	1.082	-0.02	0.03	0.11	2843.5	2945.2	3112.5	2876.2	0.57	3.94	4.05	5.13	8	High	High	High	High	High	High	High	High	High	High	High	High	2845.3	2816.4	2843.5	2807.1	2945.2	3036.2	2965.5	3112.5	3214.8	3061.4	2767.3	2876.2	1	1990.2
High	Master Protein	A0A1D8PU54	Uncharacterized protein OS=Candida albicans (strain SC5314 / ATCC MYA-2876) OX=237561 GN=CAALFM_CR10130WA PE=4 SV=1	3	9	0.831654	0.722085	0.231309	0.949	1.098	1.14	-0.08	0.14	0.19	843.7	976.1	1013	888.8	8.88	5.18	11.47	4.93	3	High	High	High	High	High	High	High	High	High	High	High	High	917.4	767.7	843.7	989.1	976.1	897.7	1149.4	1013	915.1	888.8	934	846.4	1	641.7
High	Master Protein	Q5AD10	M-AAA protease subunit OS=Candida albicans (strain SC5314 / ATCC MYA-2876) OX=237561 GN=orf19.2057 PE=3 SV=1	23	66	0.994048	0.999972	0.231369	1	0.993	1.022	0	-0.01	0.03	9880.7	9804.7	10095.4	9877.8	0.42	1.94	2.14	1.72	20	High	High	High	High	High	High	High	High	High	High	High	High	9880.7	9949.4	9874.7	9727	10091.3	9804.7	9980.8	10400.6	10095.4	9694.2	9877.8	10033.2	1	6911.1
High	Master Protein	Q59RK0	MHD domain-containing protein OS=Candida albicans (strain SC5314 / ATCC MYA-2876) OX=237561 GN=orf19.1204 PE=3 SV=1	2	2	0.536937	0.931017	0.231847	1.048	0.938	0.841	0.07	-0.09	-0.25	174.7	156.3	140.2	166.7	6.21	3.86	13.48	3.93	2	High	High	High	High	High	High	High	High	High	High	High	High	171.4	192.1	174.7	152.7	164.6	156.3	165.3	127.1	140.2	166.7	168.7	156.7	1	119.9
High	Master Protein	Q9UW25	Oxysterol-binding protein-like protein OBPa OS=Candida albicans (strain SC5314 / ATCC MYA-2876) OX=237561 GN=OBPA PE=3 SV=1	19	56	0.565682	0.267901	0.232565	1.024	1.022	1.023	0.03	0.03	0.03	5370.5	5355.4	5362.6	5242.4	0.31	2.93	2.26	1.04	19	High	High	High	High	High	High	High	High	High	High	High	High	5344.5	5374.8	5370.5	5355.4	5302.8	5600.3	5351.8	5362.6	5569.8	5242.4	5203.3	5310.8	1	3738.2
High	Master Protein	Q5APE9	Uncharacterized protein OS=Candida albicans (strain SC5314 / ATCC MYA-2876) OX=237561 GN=orf19.4816 PE=4 SV=1	3	4	0.1609	0.885656	0.233094	1.1	1.054	1.073	0.14	0.08	0.1	371.2	355.9	362.2	337.6	4.83	2.54	6.69	4.69	3	High	High	High	High	High	High	High	High	High	High	High	High	363.7	398.4	371.2	361.4	343.8	355.9	357	402.6	362.2	337.6	331.8	362.2	1	254.4
High	Master Protein	A0A1D8PJK7	Structural maintenance of chromosomes protein OS=Candida albicans (strain SC5314 / ATCC MYA-2876) OX=237561 GN=SMC3 PE=3 SV=1	4	4	0.993078	0.696192	0.233901	1.059	0.775	0.845	0.08	-0.37	-0.24	524.1	383.2	418.2	494.7	4.99	14.5	29.82	12.5	4	High	High	High	High	High	High	High	High	High	High	High	High	480.9	526	524.1	482.3	374.4	383.2	238.7	433.9	418.2	494.7	551.5	428.7	1	336.4
High	Master Protein	A0A1D8PPW6	60S ribosome subunit biogenesis protein NIP7 OS=Candida albicans (strain SC5314 / ATCC MYA-2876) OX=237561 GN=NIP7 PE=3 SV=1	8	20	0.999999	0.16464	0.233903	0.97	1.051	1.073	-0.04	0.07	0.1	1210.6	1312	1339.4	1248.5	2.99	7.82	1.32	3.66	8	High	High	High	High	High	High	High	High	High	High	High	High	1274.2	1210.2	1210.6	1264.7	1312	1466.2	1312	1339.4	1344.5	1248.5	1181.5	1267.4	1	891.3
Medium	None	Q5AG95	Bur2p OS=Candida albicans (strain SC5314 / ATCC MYA-2876) OX=237561 GN=BUR2 PE=3 SV=1	1	1	0.639541	0.695396	0.23547	1.051	0.955	0.884	0.07	-0.07	-0.18	380.7	346	320.4	362.4	3.21	6.92	9.01	6.28	0	Not Found	Not Found	Not Found	Not Found	Not Found	Not Found	Not Found	Not Found	Not Found	Not Found	Not Found	Not Found	389.5	365.5	380.7	347.5	346	306.8	342.3	320.4	285.8	371.6	362.4	329.3	3	272.4
High	Master Protein	Q5AEI1	Nuo2p OS=Candida albicans (strain SC5314 / ATCC MYA-2876) OX=237561 GN=NUO2 PE=4 SV=1	14	47	0.674631	0.140331	0.235625	0.966	0.944	0.943	-0.05	-0.08	-0.08	11989.8	11708	11699	12408.1	4.75	4.45	1.08	2.21	14	High	High	High	High	High	High	High	High	High	High	High	High	11377.3	12511.3	11989.8	11902.1	11708	10932.7	11488.6	11712.1	11699	12588.5	12408.1	12053.3	1	7957.9
High	Master Protein	Q59VY2	Methyltransferase-like protein OS=Candida albicans (strain SC5314 / ATCC MYA-2876) OX=237561 GN=ABP140 PE=3 SV=1	8	23	0.981796	0.968783	0.236715	0.982	1.01	1.035	-0.03	0.01	0.05	3885.7	3997.4	4098.4	3958.2	1.99	2.78	1.79	3.03	8	High	High	High	High	High	High	High	High	High	High	High	High	3885.7	3950.8	3797.5	3816.3	4013.8	3997.4	3992.4	4098.4	4131.8	3992	3772.4	3958.2	1	2717.9
Medium	Master Protein	A0A1D8PDD8	Tco89p OS=Candida albicans (strain SC5314 / ATCC MYA-2876) OX=237561 GN=TCO89 PE=4 SV=1	1	1	0.272669	0.38276	0.237231	0.723	0.857	0.728	-0.47	-0.22	-0.46	88.9	105.5	89.6	123	2.49	24.24	12.86	13.48	1	High	High	High	High	High	High	High	High	High	High	High	High	88.9	85.2	89	67	105.5	106.6	96.6	89.6	74.7	125	123	97.2	1	62.2
High	Master Protein	Q59MG1	2-(3-amino-3-carboxypropyl)histidine synthase subunit 1 OS=Candida albicans (strain SC5314 / ATCC MYA-2876) OX=237561 GN=DPH1 PE=3 SV=3	3	5	0.857158	0.596543	0.237242	1.038	0.945	0.91	0.05	-0.08	-0.14	804.7	732.9	705.6	775.5	0.71	7.24	5.92	4.59	3	High	High	High	High	High	High	High	High	High	High	High	High	804.7	802.7	813.4	690.8	797.3	732.9	678.6	761.7	705.6	775.5	748.1	819.2	1	562.8
High	Master Protein	Q59SR4	20S-pre-rRNA D-site endonuclease NOB1 OS=Candida albicans (strain SC5314 / ATCC MYA-2876) OX=237561 GN=HBR3 PE=3 SV=1	10	19	0.624517	0.176535	0.237395	1.004	0.958	0.969	0.01	-0.06	-0.05	2682.7	2559.3	2589.8	2672.1	0.65	2.26	0.67	1.75	10	High	High	High	High	High	High	High	High	High	High	High	High	2682.7	2708.3	2674.9	2639.1	2559.3	2525.7	2561.4	2589.8	2592.6	2594.9	2672.1	2678.2	1	1876.4
High	Master Protein	Q5ACV4	Peroxisome biogenesis protein OS=Candida albicans (strain SC5314 / ATCC MYA-2876) OX=237561 GN=orf19.2113 PE=4 SV=1	5	14	0.513353	0.968768	0.238698	1.069	1.025	0.941	0.1	0.04	-0.09	1197.2	1148.4	1053.6	1120.1	1.51	2.4	6.02	5.71	5	High	High	High	High	High	High	High	High	High	High	High	High	1189	1197.2	1223.7	1143.2	1148.4	1193.9	1131.7	1004.8	1053.6	1120.1	1095	1218.7	1	831.6
High	Master Protein	A0A1D8PGV7	FG-nucleoporin OS=Candida albicans (strain SC5314 / ATCC MYA-2876) OX=237561 GN=NSP1 PE=3 SV=1	23	72	0.98022	0.925994	0.239187	1.013	1.033	1.052	0.02	0.05	0.07	12335.8	12583	12807.6	12178.7	0.1	3.94	3.68	1.5	23	High	High	High	High	High	High	High	High	High	High	High	High	12356.2	12335.8	12335.6	12583	12797.2	11863.9	13324.8	12807.6	12381.8	12089.4	12178.7	12442.1	1	8642.6
High	Master Protein	Q5A761	CCR4-Not complex 3'-5'-exoribonuclease subunit Ccr4 OS=Candida albicans (strain SC5314 / ATCC MYA-2876) OX=237561 GN=CCR4 PE=3 SV=2	8	14	0.259272	0.0479356	0.239782	1.067	1.094	1.051	0.09	0.13	0.07	1177	1207	1159.5	1103.3	1.79	4.76	4.21	2.55	8	High	High	High	High	High	High	High	High	High	High	High	High	1177	1207.5	1166.7	1207	1180.4	1292.2	1159.5	1155.5	1243.9	1099	1150.3	1103.3	1	823.3
High	Master Protein	A0A1D8PUA3	Uncharacterized protein OS=Candida albicans (strain SC5314 / ATCC MYA-2876) OX=237561 GN=CAALFM_CR10800CA PE=3 SV=1	5	8	0.830137	0.753776	0.240393	1.035	0.947	0.898	0.05	-0.08	-0.16	792	725.2	687.2	765.5	2.82	2.11	6.6	4.99	5	High	High	High	High	High	High	High	High	High	High	High	High	792	755.9	795.8	725.2	747.3	717.6	687.2	755.1	666.4	716.7	765.5	791.1	1	554
High	Master Protein	A0A1D8PM53	Reticulon-like protein OS=Candida albicans (strain SC5314 / ATCC MYA-2876) OX=237561 GN=orf19.3799 PE=4 SV=1	14	74	0.486402	0.421167	0.24049	1.172	0.913	0.944	0.23	-0.13	-0.08	15938.3	12426.1	12838.8	13603.2	7.54	7.61	5.89	6.94	14	High	High	High	High	High	High	High	High	High	High	High	High	14064.2	16189.8	15938.3	14009.5	12214.6	12426.1	11702.9	12838.8	13089.4	13530.1	15263.3	13603.2	1	9837.3
Medium	Master Protein	A0A1D8PR43	Peroxin-1 OS=Candida albicans (strain SC5314 / ATCC MYA-2876) OX=237561 GN=PEX1 PE=3 SV=1	1	1	0.490231	0.210168	0.24062	1.118	0.81	0.75	0.16	-0.3	-0.41	427.4	309.3	286.6	382.1	12.37	12.11	18.71	5.78	1	High	High	High	High	High	High	High	High	High	High	High	High	392.4	499.1	427.4	328.7	309.3	258.6	367.5	286.6	257.8	382.1	350.1	391.4	1	274.5
High	Master Protein	A0A1D8PHN4	Uncharacterized protein OS=Candida albicans (strain SC5314 / ATCC MYA-2876) OX=237561 GN=orf19.5491 PE=3 SV=1	1	1	0.975597	0.272872	0.240665	1.081	1.136	1.168	0.11	0.18	0.22	163.2	171.4	176.3	150.9	6	8.03	6.71	13.73	1	High	High	High	High	High	High	High	High	High	High	High	High	163.2	165	147.7	171.4	168.7	194.7	169.3	176.3	192.7	135.6	150.9	177.6	1	114.1
High	Master Protein	A0A1D8PSP7	U6 snRNA-associated Sm-like protein LSm2 OS=Candida albicans (strain SC5314 / ATCC MYA-2876) OX=237561 GN=SNP3 PE=3 SV=1	4	5	0.890961	0.530348	0.240893	0.946	0.918	0.891	-0.08	-0.12	-0.17	441.2	428.3	415.6	466.3	3.65	6.08	14.9	3.65	4	High	High	High	High	High	High	High	High	High	High	High	High	446.5	441.2	416.8	429	385	428.3	331.4	415.6	445.6	438.2	466.3	467.7	1	312.3
High	Master Protein	A0A1D8PTW9	Pyridoxine 4-dehydrogenase OS=Candida albicans (strain SC5314 / ATCC MYA-2876) OX=237561 GN=CAALFM_CR09100CA PE=4 SV=1	9	23	0.998767	0.285976	0.242158	1.007	1.043	1.055	0.01	0.06	0.08	2567.7	2660.3	2691	2550.6	2.3	1.52	1.82	3.35	9	High	High	High	High	High	High	High	High	High	High	High	High	2609.4	2567.7	2493.1	2620.6	2660.3	2701.6	2611.8	2691	2699.7	2550.6	2486.4	2656.3	1	1825.2
High	Master Protein	Q59X47	Kis1p OS=Candida albicans (strain SC5314 / ATCC MYA-2876) OX=237561 GN=KIS1 PE=3 SV=1	10	22	0.668882	0.934007	0.245183	1.018	0.986	0.966	0.03	-0.02	-0.05	3762.2	3644.2	3570.9	3696.6	0.28	2.15	2.88	2.24	10	High	High	High	High	High	High	High	High	High	High	High	High	3751.8	3773.1	3762.2	3644.2	3732.9	3576.5	3452.1	3655.9	3570.9	3602.1	3696.6	3766.6	1	2624.2
High	Master Protein	Q5AIA2	Homoserine dehydrogenase OS=Candida albicans (strain SC5314 / ATCC MYA-2876) OX=237561 GN=HOM6 PE=3 SV=1	33	184	0.541117	0.0630614	0.245201	1.02	1.035	1.021	0.03	0.05	0.03	37637	38164.5	37674.3	36889.7	0.82	0.84	1.62	1.06	33	High	High	High	High	High	High	High	High	High	High	High	High	37182.6	37769.6	37637	37761.2	38397.7	38164.5	38419.7	37674.3	37204.4	36889.7	36768.2	37500.4	1	26007.6
High	None	Q5A0X6	ABC transporter domain-containing protein OS=Candida albicans (strain SC5314 / ATCC MYA-2876) OX=237561 GN=orf19.3120 PE=4 SV=1	1	5	0.0393989	0.609975	0.247325	0.579	1.285	1.399	-0.79	0.36	0.48	1548.6	3437.4	3741.5	2675.2	26.49	5.19	2.65	24.89	1	High	High	High	High	High	High	High	High	High	High	High	High	2295	1437.6	1548.6	3170.7	3500.1	3437.4	3695.8	3887.4	3741.5	3649.2	2261.6	2675.2	1	1605.3
High	Master Protein	Q59TC4	Homocitrate synthase OS=Candida albicans (strain SC5314 / ATCC MYA-2876) OX=237561 GN=LYS22 PE=3 SV=1	25	168	0.514232	0.0617563	0.249699	1.023	1.036	1.028	0.03	0.05	0.04	27454.5	27819.3	27601.8	26847.7	0.92	4.17	1.94	0.97	11	High	High	High	High	High	High	High	High	High	High	High	High	27808.5	27320.1	27454.5	27653.9	27819.3	29782.2	27601.8	27490.4	28476.7	26486.2	26847.7	26988.2	1	19450.9
High	Master Protein	Q59X93	Mitochondrial 54S ribosomal protein YmL17/YmL30 OS=Candida albicans (strain SC5314 / ATCC MYA-2876) OX=237561 GN=orf19.585 PE=3 SV=1	17	51	0.385971	0.653432	0.250997	1.024	0.975	0.966	0.03	-0.04	-0.05	9871.3	9390.4	9305.8	9636	2.64	1.17	1.37	3.09	17	High	High	High	High	High	High	High	High	High	High	High	High	9693.5	10208.5	9871.3	9324.8	9540.4	9390.4	9133.2	9305.8	9381.9	9322.9	9636	9916.8	1	6780.2
High	Master Protein	A0A1D8PJ89	Serine/threonine-protein phosphatase OS=Candida albicans (strain SC5314 / ATCC MYA-2876) OX=237561 GN=PPT1 PE=3 SV=1	9	25	0.348723	0.999068	0.251093	1.04	1.006	1.03	0.06	0.01	0.04	3267.6	3161.8	3236.1	3141.9	0.46	1.87	2.79	2.53	9	High	High	High	High	High	High	High	High	High	High	High	High	3251.1	3267.6	3281.4	3125.1	3241.2	3161.8	3387.7	3222.6	3236.1	3105.9	3141.9	3259.3	1	2274
Medium	None	Q59TV1	Uncharacterized protein OS=Candida albicans (strain SC5314 / ATCC MYA-2876) OX=237561 GN=orf19.1143 PE=4 SV=1	1	1	0.77806	0.995215	0.252142	1.156	1.011	0.809	0.21	0.02	-0.3	81.9	71.7	57.4	70.9	12.09	6.03	15.67	15.2	1	High	High	High	High	High	High	High	High	High	High	High	High	81.9	74.4	94.4	71.7	70.8	78.9	72.9	57.4	55.1	70.9	68	89.3	1	57.3
High	Master Protein	Q5AK79	CTP synthase OS=Candida albicans (strain SC5314 / ATCC MYA-2876) OX=237561 GN=URA7 PE=3 SV=1	31	105	0.86715	0.630428	0.252521	0.985	0.973	1.04	-0.02	-0.04	0.06	21238.5	20984.2	22423.1	21555.5	0.26	3.75	2.29	0.42	31	High	High	High	High	High	High	High	High	High	High	High	High	21238.5	21265.2	21160	20984.2	21881.1	20305.2	22779.7	22423.1	21773.3	21582.2	21413.3	21555.5	1	14855.4
High	Master Protein	A0A1D8PUC3	zf-LYAR domain-containing protein OS=Candida albicans (strain SC5314 / ATCC MYA-2876) OX=237561 GN=CAALFM_CR10750CA PE=4 SV=1	2	8	0.976514	0.985453	0.252543	1.003	1.008	1.064	0	0.01	0.09	1612.1	1620.3	1710	1607.7	3.37	1.9	0.5	5.28	2	High	High	High	High	High	High	High	High	High	High	High	High	1656	1612.1	1548.4	1572.9	1620.3	1630.1	1706.2	1722.7	1710	1607.7	1547.1	1716.4	1	1158.3
High	Master Protein	Q59PR1	Putative GTPase OS=Candida albicans (strain SC5314 / ATCC MYA-2876) OX=237561 GN=MTG2 PE=4 SV=1	3	3	0.613348	0.981636	0.252767	1.051	1.057	1.119	0.07	0.08	0.16	208.6	209.8	222.2	198.5	5.16	10.09	6.17	3.85	3	High	High	High	High	High	High	High	High	High	High	High	High	223.8	208.6	202.6	209.8	217.4	178.9	222.2	234.3	207.1	204.2	198.5	189.2	1	156.5
High	Master Protein	A0A1D8PPW9	Aminomethyltransferase OS=Candida albicans (strain SC5314 / ATCC MYA-2876) OX=237561 GN=GCV1 PE=3 SV=1	12	44	0.48112	0.704951	0.253207	0.984	0.988	0.967	-0.02	-0.02	-0.05	7262.7	7292.8	7141.9	7382.3	1.21	3.95	0.56	3.57	11	High	High	High	High	High	High	High	High	High	High	High	High	7124.8	7262.7	7287.8	7007.3	7292.8	7584	7141.9	7177.8	7097.5	7382.3	7265.1	7774.3	1	4983.5
High	Master Protein	A0A1D8PNJ2	Epsilon-trimethyllysine 2-oxoglutarate dioxygenase OS=Candida albicans (strain SC5314 / ATCC MYA-2876) OX=237561 GN=orf19.4316 PE=3 SV=1	4	7	0.806371	0.0843743	0.253449	0.965	0.921	0.95	-0.05	-0.12	-0.07	1181.1	1127.9	1163.2	1224.6	5.48	0.8	3.25	2.66	4	High	High	High	High	High	High	High	High	High	High	High	High	1136	1265	1181.1	1127.9	1139.1	1121.2	1163.2	1188.8	1114.9	1256.1	1191	1224.6	1	794.6
High	Master Protein	A0A1D8PS16	Phenylalanyl-tRNA synthetase beta subunit OS=Candida albicans (strain SC5314 / ATCC MYA-2876) OX=237561 GN=FRS1 PE=3 SV=1	40	181	0.351139	0.749967	0.254952	0.986	0.993	1.014	-0.02	-0.01	0.02	45650.5	45972.3	46959.1	46290.1	0.63	1.22	1.75	0.66	40	High	High	High	High	High	High	High	High	High	High	High	High	45650.5	45380.5	45957.1	45972.3	46566.8	45446.8	48282	46959.1	46758.9	46782.2	46290.1	46226.1	1	31930.5
High	Master Protein	A0A1D8PSJ6	Vacuolar transporter chaperone OS=Candida albicans (strain SC5314 / ATCC MYA-2876) OX=237561 GN=VTC3 PE=4 SV=1	28	74	0.97118	0.999955	0.255406	1.004	0.989	1.043	0.01	-0.02	0.06	13709.7	13504.2	14234.2	13651.6	0.46	1.98	2.87	0.97	27	High	High	High	High	High	High	High	High	High	High	High	High	13762	13635.4	13709.7	13504.2	13910.7	13402.5	14302.3	14234.2	13572.9	13467.2	13651.6	13724.3	1	9625.9
High	Master Protein	Q59KY7	Mitochondrial 37S ribosomal protein RSM18 OS=Candida albicans (strain SC5314 / ATCC MYA-2876) OX=237561 GN=orf19.5201 PE=4 SV=1	6	23	0.915078	0.507195	0.257606	1.025	0.932	0.9	0.04	-0.1	-0.15	6181.9	5616.6	5425.1	6028.4	2.59	6.45	11.76	4.06	6	High	High	High	High	High	High	High	High	High	High	High	High	6036.9	6357.2	6181.9	5739.1	5616.6	5075.2	4638.9	5873.1	5425.1	5694.2	6165	6028.4	1	4222.5
High	Master Protein	A0A1D8PS23	25S rRNA (Uracil2843-N3)-methyltransferase OS=Candida albicans (strain SC5314 / ATCC MYA-2876) OX=237561 GN=CAALFM_CR01780WA PE=4 SV=1	2	3	0.913315	0.363172	0.257956	1.074	0.913	0.921	0.1	-0.13	-0.12	1091.1	927.2	935.3	1015.9	5.05	5.42	14.51	8.12	2	High	High	High	High	High	High	High	High	High	High	High	High	1077.1	1181	1091.1	986.8	886.2	927.2	779.8	1045.5	935.3	1015.9	1164.8	1014	1	753.4
High	Master Protein	Q5A5P2	Serine/threonine protein kinase OS=Candida albicans (strain SC5314 / ATCC MYA-2876) OX=237561 GN=AKL1 PE=4 SV=1	3	5	0.528506	0.474861	0.25843	1.074	0.92	0.9	0.1	-0.12	-0.15	601.8	515.5	504.4	560.6	5.11	1.6	3.75	8.25	3	High	High	High	High	High	High	High	High	High	High	High	High	551.3	604.4	601.8	507.4	523.8	515.5	485.7	504.4	523.5	560.6	502.5	592.3	1	385.6
High	Master Protein	A0A1D8PRY9	Protein transport protein Sec61 subunit beta OS=Candida albicans (strain SC5314 / ATCC MYA-2876) OX=237561 GN=CAALFM_CR01490CA PE=3 SV=1	4	24	0.989323	0.522774	0.261572	1.012	1.046	1.082	0.02	0.07	0.11	5462	5646.7	5837.3	5395.9	0.6	5.57	6.5	1.5	4	High	High	High	High	High	High	High	High	High	High	High	High	5509.3	5446.1	5462	5646.7	6039.4	5411.2	6192.4	5837.3	5435.9	5502.1	5343	5395.9	1	3853.5
High	Master Protein	Q5AP90	Alpha-1,2-mannosyltransferase MNN23 OS=Candida albicans (strain SC5314 / ATCC MYA-2876) OX=237561 GN=MNN23 PE=3 SV=2	4	8	0.989385	0.365248	0.26162	1.055	0.953	0.954	0.08	-0.07	-0.07	882	796.5	797.7	836.1	6.43	2.03	1.09	2.43	4	High	High	High	High	High	High	High	High	High	High	High	High	791.2	890	882	790	821	796.5	803.7	797.7	786.7	869.1	831.5	836.1	1	553.4
Low	None	Q5ALV4	Uncharacterized protein OS=Candida albicans (strain SC5314 / ATCC MYA-2876) OX=237561 GN=orf19.1473 PE=3 SV=1	1	1	0.46242	0.929669	0.261884	0.886	1.121	1.225	-0.17	0.16	0.29	443	560.4	612.5	500	13.53	10.84	5.67	12.75	0	Not Found	Not Found	Not Found	Not Found	Not Found	Not Found	Not Found	Not Found	Not Found	Not Found	Not Found	Not Found	503.9	383.9	443	581.9	560.4	471.9	612.5	643.7	574.6	500	579.6	450.7	3	352.5
High	Master Protein	Q5A782	Eukaryotic translation initiation factor 5B OS=Candida albicans (strain SC5314 / ATCC MYA-2876) OX=237561 GN=FUN12 PE=4 SV=1	61	201	0.999864	0.102014	0.262197	0.997	0.977	0.977	0	-0.03	-0.03	36918.6	36176.3	36178.5	37043.5	1.07	3.41	1.67	0.39	60	High	High	High	High	High	High	High	High	High	High	High	High	36918.6	37578.2	36866.3	36176.3	36212.4	34101	36178.5	36287.8	35198.3	36954.4	37233.9	37043.5	1	25823
High	Master Protein	Q59P43	GTP-binding nuclear protein OS=Candida albicans (strain SC5314 / ATCC MYA-2876) OX=237561 GN=GSP1 PE=3 SV=1	17	189	0.988778	0.967745	0.26336	1.002	1.012	1.021	0	0.02	0.03	19579.8	19778.8	19955.5	19548.1	1.84	0.87	3.59	0.84	17	High	High	High	High	High	High	High	High	High	High	High	High	19579.8	19051.6	19733.1	19513.1	19778.8	19831.7	21072.9	19708.7	19955.5	19724.2	19548.1	19398	1	13695.2
High	Master Protein	A0A1D8PS11	Orotate phosphoribosyltransferase OS=Candida albicans (strain SC5314 / ATCC MYA-2876) OX=237561 GN=URA5 PE=3 SV=1	10	37	0.982446	0.928137	0.264809	0.999	0.95	0.921	0	-0.07	-0.12	12958.4	12325	11939	12969.8	9.31	3.1	18.86	2.68	10	High	High	High	High	High	High	High	High	High	High	High	High	13349.6	12958.4	11169.1	12473.6	12325	11756.8	8485.9	11939	12113.2	12504.3	13178	12969.8	1	9337.5
High	Master Protein	Q5A109	Ubiquitin-ribosomal 40S subunit protein S31 fusion protein OS=Candida albicans (strain SC5314 / ATCC MYA-2876) OX=237561 GN=UBI3 PE=3 SV=1	18	399	0.998342	0.957662	0.265295	1.027	0.998	0.992	0.04	0	-0.01	85227.8	82808.7	82368.4	82993.5	0.47	2.8	5.87	4.52	18	High	High	High	High	High	High	High	High	High	High	High	High	85851.1	85227.8	85103.4	86239.6	82808.7	81755.5	74281.7	82368.4	82409.2	82573.8	89431.1	82993.5	1	60049.1
High	Master Protein	Q5AEB4	Aminopeptidase OS=Candida albicans (strain SC5314 / ATCC MYA-2876) OX=237561 GN=orf19.354 PE=3 SV=1	3	5	0.687887	0.865684	0.265584	0.951	0.951	0.931	-0.07	-0.07	-0.1	373.9	373.9	366.3	393.4	3.15	10.63	4.74	10.37	3	High	High	High	High	High	High	High	High	High	High	High	High	373.9	367.3	390.4	373.9	354.1	433.2	337.3	366.9	366.3	393.4	453.7	372.5	1	261.6
High	Master Protein	O93803	mRNA-capping enzyme subunit beta OS=Candida albicans (strain SC5314 / ATCC MYA-2876) OX=237561 GN=CET1 PE=3 SV=2	11	25	0.946184	0.502771	0.265621	1.003	0.949	0.941	0	-0.07	-0.09	4723.9	4472.5	4433.6	4711.1	1.81	4.43	3.14	2.08	11	High	High	High	High	High	High	High	High	High	High	High	High	4723.9	4818.1	4646.8	4320.7	4716.2	4472.5	4433.6	4585.2	4306.6	4555	4711.1	4733.7	1	3304.2
High	Master Protein	Q59S45	DNA damage-binding protein CMR1 OS=Candida albicans (strain SC5314 / ATCC MYA-2876) OX=237561 GN=CAALFM_C701270CA PE=3 SV=1	4	5	0.694923	0.640216	0.265705	1.071	0.899	0.862	0.1	-0.15	-0.21	532.6	447.1	428.6	497.4	4.29	5.97	13.13	8.83	3	High	High	High	High	High	High	High	High	High	High	High	High	532.6	561.3	515.8	433.2	485.7	447.1	491.1	428.6	377.7	452.8	497.4	540.5	1	372.6
High	Master Protein	Q5A799	Coi1p OS=Candida albicans (strain SC5314 / ATCC MYA-2876) OX=237561 GN=COI1 PE=4 SV=1	8	42	0.920168	0.923915	0.267137	0.886	0.909	0.903	-0.18	-0.14	-0.15	10899.3	11184.9	11115.6	12307.8	6.55	5.68	25.57	2.75	8	High	High	High	High	High	High	High	High	High	High	High	High	12182.7	10895.2	10899.3	12044.2	11184.9	10783.3	6939.8	11457.8	11115.6	12471.6	11826.8	12307.8	1	8521.2
High	Master Protein	Q59LZ8	Uncharacterized protein OS=Candida albicans (strain SC5314 / ATCC MYA-2876) OX=237561 GN=orf19.3697 PE=4 SV=1	1	1	0.597814	0.764321	0.27024	1.066	1.043	1.125	0.09	0.06	0.17	230.1	225.1	242.9	215.9	7.28	11.56	9.44	2.25	1	High	High	High	High	High	High	High	High	High	High	High	High	256.9	224.6	230.1	263.1	225.1	211	274.9	229.1	242.9	215.9	222.7	213.2	1	179.7
High	Master Protein	A0A1D8PLY0	FG-nucleoporin OS=Candida albicans (strain SC5314 / ATCC MYA-2876) OX=237561 GN=orf19.5040 PE=4 SV=1	6	10	0.932749	0.997759	0.270303	1.009	1.016	1.044	0.01	0.02	0.06	1616.6	1628.2	1673.1	1602.1	1.37	2.44	2.07	2.31	6	High	High	High	High	High	High	High	High	High	High	High	High	1616.6	1606.8	1649.2	1628.2	1642.7	1568.4	1692	1673.1	1625.3	1574.4	1602.1	1647.9	1	1130.7
Low	Master Protein	A0A1D8PKI5	ATP-binding cassette alpha-factor transporter OS=Candida albicans (strain SC5314 / ATCC MYA-2876) OX=237561 GN=HST6 PE=4 SV=1	1	3	0.102544	0.960264	0.270621	1.087	0.987	0.914	0.12	-0.02	-0.13	368.4	334.4	309.6	338.8	8.66	3.26	6.4	5.1	1	High	High	High	High	High	High	High	High	High	High	High	High	366.9	425.7	368.4	334.4	336.8	317.1	323.4	284.8	309.6	338.8	319.9	354.3	1	256.6
High	Master Protein	A0A1D8PRI7	ER membrane protein complex subunit 4 OS=Candida albicans (strain SC5314 / ATCC MYA-2876) OX=237561 GN=orf19.7183 PE=3 SV=1	2	4	0.578141	0.549114	0.270651	0.938	0.979	1.064	-0.09	-0.03	0.09	380.2	396.9	431.2	405.4	3.02	8.66	3.23	2.05	2	High	High	High	High	High	High	High	High	High	High	High	High	390.8	380.2	367.9	400.3	396.9	341.8	450.8	423.5	431.2	405.4	391.4	405.7	1	273.3
High	Master Protein	Q59Y37	Pst2p OS=Candida albicans (strain SC5314 / ATCC MYA-2876) OX=237561 GN=PST2 PE=3 SV=1	6	16	0.316941	0.60476	0.271375	1.034	0.969	0.929	0.05	-0.05	-0.11	3192.7	2993	2868.7	3089	2.04	1.98	2.98	4.02	6	High	High	High	High	High	High	High	High	High	High	High	High	3123.3	3253.5	3192.7	2993	3001.4	2896	2860.8	3014.9	2868.7	2918.4	3156.5	3089	1	2184.6
Medium	None	Q5A8Z0	Vacuolar protein sorting-associated protein 17 OS=Candida albicans (strain SC5314 / ATCC MYA-2876) OX=237561 GN=VPS17 PE=3 SV=1	1	1	0.743981	0.446222	0.272457	1.176	0.822	0.929	0.23	-0.28	-0.11	334.8	234.1	264.7	284.8	8.03	10.08	25.42	8.86	1	High	High	High	High	High	High	High	High	High	High	High	High	312.4	366.4	334.8	268.8	221.8	234.1	165.4	271.7	264.7	277.3	326	284.8	1	218.5
High	Master Protein	Q5AI87	Carboxymethylenebutenolidase OS=Candida albicans (strain SC5314 / ATCC MYA-2876) OX=237561 GN=orf19.2966 PE=4 SV=1	5	14	0.418311	0.994916	0.273038	1.049	1.006	0.941	0.07	0.01	-0.09	2458.3	2356.8	2205.1	2343	1.98	4.94	6.31	3.33	5	High	High	High	High	High	High	High	High	High	High	High	High	2531.3	2438.4	2458.3	2470.8	2238	2356.8	2023.1	2291.9	2205.1	2343	2252	2406.4	1	1770.6
High	Master Protein	A0A1D8PEF9	Pfk26p OS=Candida albicans (strain SC5314 / ATCC MYA-2876) OX=237561 GN=PFK26 PE=4 SV=1	3	4	0.790973	0.666172	0.273166	1.006	0.798	0.719	0.01	-0.33	-0.48	164.7	130.6	117.8	163.8	6.31	10.63	18.72	11.37	2	High	High	High	High	High	High	High	High	High	High	High	High	164.1	164.7	183.1	155.6	130.6	129.6	156.3	117.8	111.9	135.6	168.3	163.8	1	114.8
High	Master Protein	A0A1D8PQ56	Leucyl-tRNA synthetase OS=Candida albicans (strain SC5314 / ATCC MYA-2876) OX=237561 GN=NAM2 PE=3 SV=1	8	13	0.998698	0.269978	0.273196	1.004	1.073	1.077	0.01	0.1	0.11	1087.9	1162.6	1166.8	1083.4	2.5	8.76	5.74	4.16	8	High	High	High	High	High	High	High	High	High	High	High	High	1087.9	1130.2	1078.8	1117.6	1162.6	1317.8	1148.8	1166.8	1275.7	1051.2	1083.4	1140.7	1	760.9
High	Master Protein	Q5AI92	C2H2-type domain-containing protein OS=Candida albicans (strain SC5314 / ATCC MYA-2876) OX=237561 GN=orf19.2961 PE=4 SV=1	2	8	0.867438	0.840271	0.273222	1.041	0.975	0.897	0.06	-0.04	-0.16	727.8	681.9	627.2	699.1	1.28	5.14	8.7	5.68	2	High	High	High	High	High	High	High	High	High	High	High	High	712.5	729.3	727.8	632.4	698.7	681.9	695.9	627.2	586.3	657.9	699.1	737.1	1	498.4
High	Master Protein	Q5AQ57	37S ribosomal protein S25, mitochondrial OS=Candida albicans (strain SC5314 / ATCC MYA-2876) OX=237561 GN=RSM25 PE=3 SV=2	18	56	0.902629	0.967486	0.273622	0.975	1.011	1.044	-0.04	0.02	0.06	8777.1	9100.2	9398.5	9002.2	1.26	3.45	2.52	1.92	18	High	High	High	High	High	High	High	High	High	High	High	High	8933	8777.1	8718.3	8667.6	9271.2	9100.2	9020	9446.7	9398.5	9002.2	8734.3	9053	1	6248.2
High	Master Protein	Q9Y7W4	Serine/threonine-protein kinase BUR1 OS=Candida albicans (strain SC5314 / ATCC MYA-2876) OX=237561 GN=CRK1 PE=3 SV=3	2	2	0.66182	0.127141	0.273875	1.065	0.896	0.931	0.09	-0.16	-0.1	308.9	259.8	269.9	290	11.05	3.57	1.36	4	1	High	High	High	High	High	High	High	High	High	High	High	High	283.5	352.3	308.9	251.9	259.8	270.4	263.9	270.5	269.9	290	288.4	309.7	1	198.3
High	Master Protein	A0A1D8PQN0	Ribosomal 40S subunit protein S28B OS=Candida albicans (strain SC5314 / ATCC MYA-2876) OX=237561 GN=RPS28B PE=3 SV=1	9	142	0.88788	0.574606	0.274443	0.983	0.981	0.952	-0.03	-0.03	-0.07	34838.1	34763.8	33767.8	35452	0.55	6.4	1.56	2.62	9	High	High	High	High	High	High	High	High	High	High	High	High	34838.1	34546.9	34903.8	34763.8	36043.9	31781.8	33767.8	33854.8	32909.9	36465.5	35452	34608.2	1	24367.7
High	Master Protein	A0A1D8PP95	Ubiquitin carboxyl-terminal hydrolase OS=Candida albicans (strain SC5314 / ATCC MYA-2876) OX=237561 GN=orf19.6319 PE=3 SV=1	9	18	0.0510907	0.419051	0.275916	1.078	1.026	1.054	0.11	0.04	0.08	2341.5	2228.1	2289.7	2172.4	0.56	3.19	2.54	2.89	9	High	High	High	High	High	High	High	High	High	High	High	High	2341.5	2346.5	2321.7	2228.1	2216.4	2346.9	2217.2	2331.4	2289.7	2137.1	2172.4	2260	1	1637.8
High	Master Protein	A0A1D8PCY8	Mas1p OS=Candida albicans (strain SC5314 / ATCC MYA-2876) OX=237561 GN=MAS1 PE=3 SV=1	19	56	0.524501	0.860319	0.276761	0.964	0.991	0.952	-0.05	-0.01	-0.07	9981.1	10264.3	9861.2	10357.6	3.15	4.06	1.29	1.6	19	High	High	High	High	High	High	High	High	High	High	High	High	9981.1	10234.8	9612.7	9621.5	10264.3	10382.3	9915.2	9861.2	9674.5	10357.6	10076	10363.7	1	6981.3
High	Master Protein	A0A1D8PH70	DNA-binding ATPase OS=Candida albicans (strain SC5314 / ATCC MYA-2876) OX=237561 GN=orf19.4502 PE=4 SV=1	10	17	0.120282	0.955084	0.277996	1.058	1.01	0.967	0.08	0.01	-0.05	1914.7	1827.2	1749.3	1809.1	1.89	1.48	3.5	3.92	10	High	High	High	High	High	High	High	High	High	High	High	High	1976.5	1911.8	1914.7	1827.2	1825.5	1873.6	1749.3	1793.5	1673.1	1756.4	1809.1	1897.5	1	1382.5
High	Master Protein	P46250	SEC14 cytosolic factor OS=Candida albicans (strain SC5314 / ATCC MYA-2876) OX=237561 GN=SEC14 PE=2 SV=1	23	97	0.994514	0.758	0.278059	0.995	1.015	1.036	-0.01	0.02	0.05	15825.1	16145.3	16483.1	15907.5	1.33	2.21	3.5	1.89	23	High	High	High	High	High	High	High	High	High	High	High	High	15717.7	15825.1	16125.9	15757.6	16467.9	16145.3	15834.8	16981.1	16483.1	15907.5	15481.2	16058.4	1	10993.9
High	Master Protein	Q59T38	tRNA-splicing endonuclease subunit Sen34 OS=Candida albicans (strain SC5314 / ATCC MYA-2876) OX=237561 GN=orf19.6879 PE=3 SV=1	2	2	0.979071	0.999442	0.278623	1.082	1.051	0.914	0.11	0.07	-0.13	364.7	354.2	308	337.1	7.24	6.48	8.03	5.86	2	High	High	High	High	High	High	High	High	High	High	High	High	326.9	376.2	364.7	325.9	354.2	370.8	308	288.6	338.2	335.4	337.1	371.5	1	228.7
High	Master Protein	Q5AB74	CCT-theta OS=Candida albicans (strain SC5314 / ATCC MYA-2876) OX=237561 GN=CCT8 PE=3 SV=1	35	143	0.991144	0.979723	0.278869	0.996	0.984	0.969	-0.01	-0.02	-0.05	22986	22722.6	22365.7	23088.7	0.62	3.9	1.54	0.46	35	High	High	High	High	High	High	High	High	High	High	High	High	22986	23047.1	22775.9	22125.1	22722.6	23881.5	21905.6	22365.7	22578	22929.8	23133	23088.7	1	16077.7
Low	None	A0A1D8PFE0	RHOMBOID-like protein OS=Candida albicans (strain SC5314 / ATCC MYA-2876) OX=237561 GN=RBD1 PE=3 SV=1	1	2	0.984544	0.990581	0.279592	0.983	1.026	1.086	-0.02	0.04	0.12	823.9	859.5	910.1	837.8	5.08	6.99	3.48	3.62	0	Not Found	Not Found	Not Found	Not Found	Not Found	Not Found	Not Found	Not Found	Not Found	Not Found	Not Found	Not Found	823.9	892.2	813.2	896.6	859.5	780.9	962.8	910.1	904.5	890.5	836	837.8	2	576.3
High	Master Protein	A0A1D8PCP6	Age3p OS=Candida albicans (strain SC5314 / ATCC MYA-2876) OX=237561 GN=AGE3 PE=4 SV=1	14	51	0.705593	0.368407	0.281016	1.033	0.97	0.954	0.05	-0.04	-0.07	10282.6	9655	9491.8	9949.5	2.57	3.53	3.99	1.47	14	High	High	High	High	High	High	High	High	High	High	High	High	9897.6	10282.6	10398.5	9655	9728.7	9114.4	9802	9491.8	9051.8	9758	9949.5	10044.2	1	6923
High	Master Protein	A0A1D8PIH3	Protein BIG1 OS=Candida albicans (strain SC5314 / ATCC MYA-2876) OX=237561 GN=ABG1 PE=3 SV=1	5	7	0.396395	0.617928	0.282087	1.072	0.978	0.939	0.1	-0.03	-0.09	1358.7	1239.6	1190	1267.8	3.85	7.55	5.65	3.64	5	High	High	High	High	High	High	High	High	High	High	High	High	1310	1414.8	1358.7	1256	1239.6	1092.1	1200.9	1190	1082.5	1214.6	1306	1267.8	1	916.3
High	Master Protein	Q5AH07	Nuc2p OS=Candida albicans (strain SC5314 / ATCC MYA-2876) OX=237561 GN=NUC2 PE=3 SV=1	18	93	0.993308	0.425206	0.282481	0.992	1.035	1.078	-0.01	0.05	0.11	13172.8	13744.1	14315.1	13277.7	0.98	9.69	6.26	1.67	18	High	High	High	High	High	High	High	High	High	High	High	High	13113	13360.8	13172.8	13573	13744.1	16083	13984.3	14315.1	15714.5	13223.6	13277.7	13633.7	1	9171.9
High	Master Protein	Q59NQ6	Small nuclear ribonucleoprotein Sm D3 OS=Candida albicans (strain SC5314 / ATCC MYA-2876) OX=237561 GN=SMD3 PE=3 SV=1	4	4	0.454413	0.419166	0.282798	0.924	1.018	1.03	-0.11	0.03	0.04	445.2	490.6	496.2	481.9	3.38	2.2	1.53	6.11	4	High	High	High	High	High	High	High	High	High	High	High	High	445.2	462.3	432.3	482.7	490.6	504.1	490.5	496.2	505.5	488.8	481.9	436.1	1	311.4
High	Master Protein	Q59NQ5	Glutathione reductase OS=Candida albicans (strain SC5314 / ATCC MYA-2876) OX=237561 GN=GLR1 PE=3 SV=1	33	111	0.74562	1	0.282816	1.006	0.992	1.007	0.01	-0.01	0.01	23921.9	23574	23930.1	23767.6	0.94	1.1	0.59	0.64	33	High	High	High	High	High	High	High	High	High	High	High	High	23921.9	23601	24034.4	23574	23981.2	23498.7	23930.1	24169.8	23917.1	23767.6	23509.6	23779.7	1	16732.3
High	Master Protein	Q59M47	Uncharacterized protein OS=Candida albicans (strain SC5314 / ATCC MYA-2876) OX=237561 GN=CAALFM_CR05500CA PE=4 SV=1	2	7	0.833615	0.999707	0.283343	1.137	0.961	0.884	0.18	-0.06	-0.18	131.5	111.2	102.3	115.7	2.8	19.86	13.7	7.4	2	High	High	High	High	High	High	High	High	High	High	High	High	125.9	132.8	131.5	105	111.2	149.7	109.7	83.5	102.3	113.3	115.7	129.7	1	88.1
High	Master Protein	A0A1D8PSE0	Uncharacterized protein OS=Candida albicans (strain SC5314 / ATCC MYA-2876) OX=237561 GN=CAALFM_CR03120WA PE=4 SV=1	17	43	0.286345	0.431656	0.283428	1.038	0.97	0.955	0.05	-0.04	-0.07	7442.3	6953.3	6844.2	7168.2	1.71	3.19	2.72	2.66	17	High	High	High	High	High	High	High	High	High	High	High	High	7442.3	7656.4	7426.4	7191.3	6953.3	6747.5	6766.9	7124.1	6844.2	7034.2	7168.2	7412.5	1	5205.6
High	Master Protein	Q5ABC3	Elongation factor Tu OS=Candida albicans (strain SC5314 / ATCC MYA-2876) OX=237561 GN=TUF1 PE=3 SV=1	29	335	0.982812	0.670704	0.283535	1.013	1.028	1.054	0.02	0.04	0.08	44075	44685.5	45856.2	43488.8	2.24	4.94	4.31	0.9	29	High	High	High	High	High	High	High	High	High	High	High	High	42937	44899.2	44075	42950.3	44685.5	47363.3	44120.5	45856.2	48074.9	43138.9	43488.8	43919.4	1	30032.5
High	Master Protein	A0A1D8PGZ6	Uncharacterized protein OS=Candida albicans (strain SC5314 / ATCC MYA-2876) OX=237561 GN=orf19.835 PE=4 SV=1	1	1	0.734323	0.344144	0.283662	1.13	1.203	1.27	0.18	0.27	0.34	144.3	153.6	162.1	127.7	5.99	17.88	15.92	6.64	1	High	High	High	High	High	High	High	High	High	High	High	High	157.3	140.5	144.3	153.6	136.3	192.5	162.1	137.6	189.5	127.1	127.7	142.6	1	110.1
High	Master Protein	A0A1D8PHQ6	Gre2p OS=Candida albicans (strain SC5314 / ATCC MYA-2876) OX=237561 GN=GRE2 PE=4 SV=1	10	21	0.944031	0.391077	0.28489	1.006	1.013	1.029	0.01	0.02	0.04	3476.7	3500.4	3554.6	3455.9	0.04	5.5	4.41	1.87	10	High	High	High	High	High	High	High	High	High	High	High	High	3476.7	3477.3	3474.7	3500.4	3467.2	3825.2	3510.2	3554.6	3806.7	3459.7	3346.9	3455.9	1	2431.8
Medium	None	0000000C	emb|AKM12456.1|Immunoglobulin gamma heavy chain, partial CONTAMINANT [Oryctolagus cuniculus cuniculus]	1	1	0.587128	0.816641	0.285382	1.141	0.941	0.72	0.19	-0.09	-0.47	197.6	162.9	124.7	173.2	41.6	8.27	8.54	8.47	1	High	High	High	High	High	High	High	High	High	High	High	High	352.6	197.6	167.1	165.4	162.9	141.8	123.9	143.6	124.7	173.2	199.8	173	1	246.6
Medium	None	0000000B	emb|AAA64252.1|Ig gamma H-chain, partial CONTAMINANT [Oryctolagus cuniculus]	1	1	0.587128	0.816641	0.285382	1.141	0.941	0.72	0.19	-0.09	-0.47	197.6	162.9	124.7	173.2	41.6	8.27	8.54	8.47	1	High	High	High	High	High	High	High	High	High	High	High	High	352.6	197.6	167.1	165.4	162.9	141.8	123.9	143.6	124.7	173.2	199.8	173	1	246.6
High	Master Protein	Q9Y872	Sulfate adenylyltransferase OS=Candida albicans (strain SC5314 / ATCC MYA-2876) OX=237561 GN=MET3 PE=3 SV=2	18	52	0.933581	0.105814	0.285447	0.982	1.045	1.02	-0.03	0.06	0.03	7866.8	8370.9	8175.8	8011.8	1.29	3.41	3.41	2.45	18	High	High	High	High	High	High	High	High	High	High	High	High	7742.4	7942.9	7866.8	8370.9	8215.3	8774.3	8127.3	8175.8	8641.2	8011.8	7739.7	8118.2	1	5415.5
High	Master Protein	Q59QB7	CCT-alpha OS=Candida albicans (strain SC5314 / ATCC MYA-2876) OX=237561 GN=TCP1 PE=3 SV=1	32	149	0.881619	0.0593276	0.286281	1.002	0.984	0.985	0	-0.02	-0.02	24861.2	24411	24429.7	24800.6	0.72	1.08	0.99	0.21	32	High	High	High	High	High	High	High	High	High	High	High	High	25116.1	24861.2	24771.9	24462.3	24411	23984.9	24255.1	24735.7	24429.7	24738.2	24842.2	24800.6	1	17567.6
High	Master Protein	A0A1D8PQF9	Probable electron transfer flavoprotein subunit alpha OS=Candida albicans (strain SC5314 / ATCC MYA-2876) OX=237561 GN=orf19.2150 PE=3 SV=1	13	54	0.984894	0.270758	0.286447	0.982	1.031	1.038	-0.03	0.04	0.05	9832.7	10327.2	10401.1	10017.8	1.97	2.49	2.2	1.09	13	High	High	High	High	High	High	High	High	High	High	High	High	10119.5	9747.6	9832.7	10011.9	10518.5	10327.2	10017.3	10415.6	10401.1	10018.4	9829.5	10017.8	1	7078.2
High	Master Protein	Q5AEB8	Proteasome core particle subunit alpha 3 OS=Candida albicans (strain SC5314 / ATCC MYA-2876) OX=237561 GN=PRE9 PE=3 SV=1	15	57	0.999343	0.904726	0.287224	0.993	0.992	0.971	-0.01	-0.01	-0.04	8422	8412.5	8237.1	8479.8	0.87	1.76	1.6	1.12	15	High	High	High	High	High	High	High	High	High	High	High	High	8422	8409.4	8542.6	8412.5	8550.8	8254.9	8186.8	8437.1	8237.1	8479.8	8370.3	8558.6	1	5890.8
High	Master Protein	Q5AK00	Uncharacterized protein OS=Candida albicans (strain SC5314 / ATCC MYA-2876) OX=237561 GN=orf19.4021 PE=4 SV=1	19	63	0.297556	0.99985	0.287622	1.031	0.989	0.98	0.04	-0.02	-0.03	9776.2	9375.8	9293.8	9479.1	1.04	1.5	3.18	0.9	19	High	High	High	High	High	High	High	High	High	High	High	High	9776.2	9791.9	9609.8	9375.8	9367.9	9617	8832.6	9372.7	9293.8	9344.8	9503.5	9479.1	1	6838
High	Master Protein	A0A1D8PJ73	Ali1p OS=Candida albicans (strain SC5314 / ATCC MYA-2876) OX=237561 GN=ALI1 PE=3 SV=1	22	117	0.852776	0.99915	0.287781	0.994	1.005	1.031	-0.01	0.01	0.04	21600.8	21846.3	22404	21731	0.27	1.85	1.34	1.8	22	High	High	High	High	High	High	High	High	High	High	High	High	21666.9	21600.8	21550.4	21446.1	22255.2	21846.3	21991.4	22572.4	22404	21731	21471.7	22243	1	15155.1
Low	Master Protein	A0A1D8PD48	Uncharacterized protein OS=Candida albicans (strain SC5314 / ATCC MYA-2876) OX=237561 GN=orf19.4463 PE=4 SV=1	1	2	0.998927	0.737817	0.287988	0.981	0.86	0.84	-0.03	-0.22	-0.25	927	812.5	793.7	944.5	5.56	7.4	18.84	7.34	1	High	High	High	High	High	High	High	High	High	High	High	High	865.3	966.9	927	891.3	812.5	771.1	610.2	895	793.7	949.4	944.5	831.5	1	605.2
High	Master Protein	Q5APF8	Pyrophosphate phospho-hydrolase OS=Candida albicans (strain SC5314 / ATCC MYA-2876) OX=237561 GN=orf19.4807 PE=3 SV=1	3	5	0.929578	0.152677	0.288228	0.985	1.118	1.089	-0.02	0.16	0.12	371.9	422	411.1	377.4	4.85	5.55	2.51	7.07	3	High	High	High	High	High	High	High	High	High	High	High	High	387.5	351.7	371.9	397.8	444.6	422	411.1	403.1	423.7	408.5	355	377.4	1	271.1
High	Master Protein	Q59PE7	Protein BCP1 OS=Candida albicans (strain SC5314 / ATCC MYA-2876) OX=237561 GN=BCP1 PE=3 SV=1	14	35	0.512435	0.996475	0.288542	0.974	0.989	1.027	-0.04	-0.02	0.04	6748	6852.8	7115	6927.6	2.05	2.99	1.52	1.17	14	High	High	High	High	High	High	High	High	High	High	High	High	6917	6641.3	6748	6852.8	7139.4	6738	7283.5	7080.9	7115	6927.6	6853.7	7016.3	1	4838.1
High	None	A0A1D8PJ35	ZZ-type domain-containing protein OS=Candida albicans (strain SC5314 / ATCC MYA-2876) OX=237561 GN=orf19.2515 PE=4 SV=1	2	5	0.993473	0.691594	0.288723	1.012	1.076	1.118	0.02	0.11	0.16	611.2	649.6	674.8	603.8	3.41	9.01	6.74	4.14	1	High	High	High	High	High	High	High	High	High	High	High	High	611.2	617	578.9	676.6	649.6	567.4	690.9	607.4	674.8	566.6	613	603.8	1	427.5
High	Master Protein	Q5AJS6	Multiple RNA-binding domain-containing protein 1 OS=Candida albicans (strain SC5314 / ATCC MYA-2876) OX=237561 GN=MRD1 PE=3 SV=2	19	47	0.827357	0.616528	0.289952	1.026	1	0.954	0.04	0	-0.07	6698.9	6528.2	6228.5	6528.7	2.33	3.19	2.78	3.57	19	High	High	High	High	High	High	High	High	High	High	High	High	6698.9	6935.2	6637.2	6183.1	6528.2	6546.5	6195.7	6514.8	6228.5	6528.7	6440.6	6887.3	1	4685.6
High	Master Protein	A0A1D8PHU3	HIT-type domain-containing protein OS=Candida albicans (strain SC5314 / ATCC MYA-2876) OX=237561 GN=orf19.2260 PE=4 SV=1	1	1	0.911548	0.735173	0.289999	1.038	0.903	0.845	0.05	-0.15	-0.24	230.9	201	187.9	222.4	4.14	2.89	14.35	7.83	1	High	High	High	High	High	High	High	High	High	High	High	High	216.8	234.7	230.9	201	208.4	196.9	220	187.9	165.4	198.7	222.4	231.8	1	151.6
High	Master Protein	A0A1D8PRQ4	Uncharacterized protein OS=Candida albicans (strain SC5314 / ATCC MYA-2876) OX=237561 GN=CAALFM_CR00430CA PE=3 SV=1	2	7	0.997659	0.606333	0.290649	0.923	1.096	1.131	-0.12	0.13	0.18	141.1	167.5	172.9	152.9	10.53	9.47	9.77	10.56	2	High	High	High	High	High	High	High	High	High	High	High	High	164.7	141.1	135.6	143.6	171.9	167.5	152.3	172.9	185.2	152.9	127.3	154.7	1	115.2
High	Master Protein	A0A1D8PFL7	26S proteasome regulatory subunit RPN1 OS=Candida albicans (strain SC5314 / ATCC MYA-2876) OX=237561 GN=RPN1 PE=3 SV=1	32	89	0.810342	0.873438	0.29083	0.986	1.018	1.037	-0.02	0.03	0.05	13016.2	13445.1	13691.6	13204.9	1.23	3.12	3.75	1.96	32	High	High	High	High	High	High	High	High	High	High	High	High	13136.3	13016.2	12819.5	13064.5	13445.1	13904.7	13691.6	13386	14397	13204.9	13013.4	13526.1	1	9188.3
High	Master Protein	Q5A869	Signal peptidase complex catalytic subunit SEC11 OS=Candida albicans (strain SC5314 / ATCC MYA-2876) OX=237561 GN=SEC11 PE=3 SV=1	3	17	0.819595	0.0695552	0.290943	1.031	1.088	1.061	0.04	0.12	0.09	2012.3	2122.2	2071.1	1951.4	1.38	2.83	2.65	3.45	3	High	High	High	High	High	High	High	High	High	High	High	High	2040.3	2012.3	1984.7	2042	2122.2	2158.4	2107.9	2071.1	2000.4	1951.4	1921.8	2051.9	1	1427.1
High	Master Protein	A0A1D8PMV1	Usp domain-containing protein OS=Candida albicans (strain SC5314 / ATCC MYA-2876) OX=237561 GN=orf19.5680 PE=4 SV=1	1	2	0.999736	0.293953	0.292486	1.021	0.82	0.887	0.03	-0.29	-0.17	357	286.8	310.1	349.7	4.22	11.95	15.2	4.16	1	High	High	High	High	High	High	High	High	High	High	High	High	335.2	363.5	357	339	286.8	270.7	249.9	339.3	310.1	334.6	349.7	363.6	1	234.4
High	Master Protein	A0A1D8PFS0	SNAP receptor OS=Candida albicans (strain SC5314 / ATCC MYA-2876) OX=237561 GN=orf19.5006.1 PE=4 SV=1	4	16	0.914063	0.267327	0.292921	1.06	0.912	0.864	0.08	-0.13	-0.21	2724.5	2344.2	2220.8	2570.5	1.88	6.03	13.33	7.05	4	High	High	High	High	High	High	High	High	High	High	High	High	2724.5	2814.3	2724.5	2447.3	2344.2	2170.2	2696.6	2220.8	2108.3	2506.3	2856.4	2570.5	1	1905.7
Medium	Master Protein	Q59RQ0	ATP-dependent DNA helicase PIF1 OS=Candida albicans (strain SC5314 / ATCC MYA-2876) OX=237561 GN=PIF1 PE=1 SV=2	1	2	0.152854	0.354715	0.292992	1.143	0.936	0.921	0.19	-0.1	-0.12	772	632	621.9	675.5	5.21	2.68	3.07	9.6	1	High	High	High	High	High	High	High	High	High	High	High	High	733.5	814	772	632	619.3	653	616.4	621.9	652.3	675.5	634.9	764.8	1	513.1
High	Master Protein	A0A1D8PQH1	Uncharacterized protein OS=Candida albicans (strain SC5314 / ATCC MYA-2876) OX=237561 GN=orf19.7116 PE=4 SV=1	12	38	0.611645	0.887426	0.293119	1.059	0.976	0.938	0.08	-0.03	-0.09	7386.5	6813	6548.1	6977.6	2.3	3.8	9.05	1.86	12	High	High	High	High	High	High	High	High	High	High	High	High	7386.5	7511.2	7175.8	7002	6813	6492.7	5820.8	6975.6	6548.1	6845.1	7104.2	6977.6	1	5166.5
High	Master Protein	Q59RN6	Histone H2A.Z-specific chaperone CHZ1 OS=Candida albicans (strain SC5314 / ATCC MYA-2876) OX=237561 GN=CHZ1 PE=3 SV=2	7	32	0.99986	0.949633	0.293933	0.958	1.005	0.896	-0.06	0.01	-0.16	10465	10973.9	9780.5	10918.4	10.68	1.47	13.49	5.16	7	High	High	High	High	High	High	High	High	High	High	High	High	11982.8	9736.3	10465	11250.6	10962.9	10973.9	7840.9	10176.7	9780.5	10008.2	10995.7	10918.4	1	8381.4
High	Master Protein	Q5AI97	Mitochondrial genome maintenance protein MGM101 OS=Candida albicans (strain SC5314 / ATCC MYA-2876) OX=237561 GN=MGM101 PE=3 SV=2	5	11	0.244542	0.748271	0.294548	1.037	0.988	0.943	0.05	-0.02	-0.09	1227.7	1169.1	1115.8	1183.7	3.46	2.42	2.86	3.49	5	High	High	High	High	High	High	High	High	High	High	High	High	1219.1	1297.9	1227.7	1123.1	1169.1	1173.7	1166.3	1106.2	1115.8	1183.7	1144.7	1227.4	1	852.7
High	Master Protein	Q5A678	Ssz1p OS=Candida albicans (strain SC5314 / ATCC MYA-2876) OX=237561 GN=SSZ1 PE=3 SV=1	37	282	0.70825	0.335779	0.29581	0.983	1.026	1.034	-0.02	0.04	0.05	50487	52666.7	53089.8	51350.9	0.61	3.69	1.82	0.43	37	High	High	High	High	High	High	High	High	High	High	High	High	50853	50243.5	50487	51392.9	52666.7	55242.4	52249.5	53089.8	54184.3	51350.9	51332.1	51721.1	1	35569.5
High	Master Protein	A0A1D8PP77	Proteasome regulatory particle lid subunit OS=Candida albicans (strain SC5314 / ATCC MYA-2876) OX=237561 GN=RPN5 PE=3 SV=1	17	58	0.291626	0.317287	0.298621	0.979	0.967	0.976	-0.03	-0.05	-0.04	9816.8	9699	9788.1	10031.1	2.43	1.83	1.75	1.04	16	High	High	High	High	High	High	High	High	High	High	High	High	9921.2	9469.7	9816.8	9593.5	9942.1	9699	9788.1	9877.6	9547.5	10031.1	9909.2	10116.7	1	6939.5
High	Master Protein	Q5A1N1	Uncharacterized protein OS=Candida albicans (strain SC5314 / ATCC MYA-2876) OX=237561 GN=orf19.1964 PE=4 SV=1	2	3	0.117143	0.282897	0.29915	1.064	1.035	1.063	0.09	0.05	0.09	300.5	292.3	300.2	282.4	0.31	1.3	4.46	6.31	2	High	High	High	High	High	High	High	High	High	High	High	High	300.5	301.7	299.8	292	298.8	292.3	279.1	300.2	303.1	282.4	257.1	290.6	1	210.2
High	Master Protein	Q5ABB2	Lactoylglutathione lyase OS=Candida albicans (strain SC5314 / ATCC MYA-2876) OX=237561 GN=GLO1 PE=3 SV=1	8	21	0.975163	0.999987	0.299451	1.002	0.983	0.94	0	-0.02	-0.09	5636.5	5533.8	5291.7	5627.4	2.19	2.08	11.61	3.88	8	High	High	High	High	High	High	High	High	High	High	High	High	5797.3	5636.5	5552.8	5671.8	5533.8	5443.1	4361.8	5439.3	5291.7	5627.4	5297.3	5701.7	1	4055
High	Master Protein	Q59YG5	Mitochondrial import inner membrane translocase subunit TIM23 OS=Candida albicans (strain SC5314 / ATCC MYA-2876) OX=237561 GN=TIM23 PE=3 SV=1	11	50	0.999985	0.881167	0.300351	0.993	1.001	1.027	-0.01	0	0.04	10706.1	10795.5	11069.7	10781.9	0.41	1.86	3.34	1.4	11	High	High	High	High	High	High	High	High	High	High	High	High	10733.9	10706.1	10648.3	10657.2	11053.4	10795.5	10673.3	11069.7	11411.7	10530.2	10781.9	10796.2	1	7507.9
High	Master Protein	Q5AMP4	Malate dehydrogenase OS=Candida albicans (strain SC5314 / ATCC MYA-2876) OX=237561 GN=MDH1-1 PE=3 SV=1	24	217	0.0751716	0.74031	0.300391	0.954	1.026	1.045	-0.07	0.04	0.06	31787.1	34204.4	34816.3	33330.9	1.63	2.47	3.34	0.78	24	High	High	High	High	High	High	High	High	High	High	High	High	31787.1	30906.7	31804	32953	34545.4	34204.4	33175.8	35397.1	34816.3	33330.9	33464.3	32965.3	1	22233.7
High	Master Protein	Q5A1E3	Transcriptional regulator CBF1 OS=Candida albicans (strain SC5314 / ATCC MYA-2876) OX=237561 GN=CBF1 PE=1 SV=2	8	23	1	0.93898	0.300638	0.993	0.989	0.96	-0.01	-0.02	-0.06	5901.1	5877.8	5706.4	5944.9	1.78	2.67	4.58	0.7	6	High	High	High	High	High	High	High	High	High	High	High	High	6052.8	5849.6	5901.1	5877.8	6004.4	5693.3	5706.4	5932.3	5413.5	5969.6	5944.9	5888.7	1	4233.6
High	Master Protein	A0A1D8PSC5	Ribosomal 60S subunit protein L28 OS=Candida albicans (strain SC5314 / ATCC MYA-2876) OX=237561 GN=RPL28 PE=3 SV=1	15	184	0.0891166	0.776388	0.301222	0.918	0.992	1.06	-0.12	-0.01	0.08	34992.9	37819.1	40420.3	38132.8	2.32	5.19	2.23	3.8	15	High	High	High	High	High	High	High	High	High	High	High	High	35922.6	34297.7	34992.9	37819.1	38483.6	34868.7	41121.5	40420.3	39339.9	39540.9	38132.8	36643.1	1	25126.3
High	Master Protein	A0A1D8PDC2	Uncharacterized protein OS=Candida albicans (strain SC5314 / ATCC MYA-2876) OX=237561 GN=orf19.6855 PE=4 SV=1	2	2	0.814235	0.991216	0.302105	0.975	0.983	0.949	-0.04	-0.03	-0.08	488.5	492.4	475.4	501.1	1.51	6.71	5.52	3.3	2	High	High	High	High	High	High	High	High	High	High	High	High	492.9	478.6	488.5	492.4	534.8	468.7	475.4	490.3	440	501.1	488.3	521.3	1	344.8
High	Master Protein	Q5ABB4	Phosphoglycerate mutase OS=Candida albicans (strain SC5314 / ATCC MYA-2876) OX=237561 GN=orf19.6056 PE=4 SV=1	6	7	0.983844	0.444893	0.302397	1.004	1.063	1.075	0.01	0.09	0.1	1071.6	1133.7	1146.8	1067	3.69	6.2	0.89	5.39	6	High	High	High	High	High	High	High	High	High	High	High	High	1071.6	1123.2	1044.9	1199	1133.7	1059	1150.4	1131.2	1146.8	1008.7	1067	1123.7	1	749.6
High	Master Protein	A0A1D8PTK4	Uncharacterized protein OS=Candida albicans (strain SC5314 / ATCC MYA-2876) OX=237561 GN=CAALFM_CR07690WA PE=4 SV=1	2	5	0.663271	0.999891	0.302435	0.931	0.993	0.941	-0.1	-0.01	-0.09	1117.5	1191.7	1129.8	1200.5	4.17	4.62	5.46	2.18	2	High	High	High	High	High	High	High	High	High	High	High	High	1196.2	1117.5	1110.5	1129.2	1238.5	1191.7	1045.7	1129.8	1163.7	1206.3	1158.7	1200.5	1	836.7
High	Master Protein	A0A1D8PKR8	RING-type domain-containing protein OS=Candida albicans (strain SC5314 / ATCC MYA-2876) OX=237561 GN=orf19.6753 PE=4 SV=1	4	10	0.367797	0.908229	0.302446	0.88	0.985	0.927	-0.18	-0.02	-0.11	2061.8	2309.1	2173.1	2343.5	5.05	3.72	17.22	9.7	4	High	High	High	High	High	High	High	High	High	High	High	High	2214.5	2011.4	2061.8	2309.1	2379	2208.7	1692.5	2395.7	2173.1	2268.6	2710.8	2343.5	1	1549
High	Master Protein	A0A1D8PP79	Uncharacterized protein OS=Candida albicans (strain SC5314 / ATCC MYA-2876) OX=237561 GN=orf19.4029 PE=4 SV=1	17	45	0.924043	0.330701	0.303146	0.98	1.049	1.075	-0.03	0.07	0.1	4349.8	4658.1	4771.9	4439.3	2.07	0.53	6.01	0.9	17	High	High	High	High	High	High	High	High	High	High	High	High	4463	4349.8	4284.1	4633.4	4683.1	4658.1	4355.4	4771.9	4890.4	4439.3	4476.2	4396.8	1	3121.7
High	Master Protein	Q5A397	Hsp70 family ATPase OS=Candida albicans (strain SC5314 / ATCC MYA-2876) OX=237561 GN=SSB1 PE=3 SV=1	54	1192	0.681204	0.87171	0.303699	1.058	1.007	0.973	0.08	0.01	-0.04	163249	155466	150143	154355	2.46	2.71	1.79	3.78	53	High	High	High	High	High	High	High	High	High	High	High	High	156978	164336	163249	155466	150274	158572	150143	148544	153799	153727	164346	154355	1	109799
High	Master Protein	A0A1D8PN05	Nrd1 complex RNA-binding subunit OS=Candida albicans (strain SC5314 / ATCC MYA-2876) OX=237561 GN=orf19.581 PE=4 SV=1	21	68	0.517809	0.610428	0.304168	1.028	1.013	1.039	0.04	0.02	0.06	13242	13045.2	13382.2	12876.1	1.97	2.59	2.25	1.96	21	High	High	High	High	High	High	High	High	High	High	High	High	12851.3	13339.8	13242	12800.9	13045.2	13470.5	12913.9	13468	13382.2	12532.1	13021.3	12876.1	1	8988.9
High	Master Protein	Q5ACU4	Mediator of RNA polymerase II transcription subunit 21 OS=Candida albicans (strain SC5314 / ATCC MYA-2876) OX=237561 GN=SRB7 PE=3 SV=1	3	4	0.985934	0.315214	0.304799	1.05	1.144	1.28	0.07	0.19	0.36	657.1	716.2	801.3	625.8	5.42	11.48	19.24	7.68	3	High	High	High	High	High	High	High	High	High	High	High	High	688.4	617.6	657.1	713.7	716.2	867.2	614	801.3	908.4	588.5	625.8	685	1	481.5
Medium	Master Protein	A0A1D8PTG3	Uncharacterized protein OS=Candida albicans (strain SC5314 / ATCC MYA-2876) OX=237561 GN=CAALFM_CR07310WA PE=4 SV=1	2	9	0.990282	0.936331	0.306397	1.036	0.99	0.926	0.05	-0.02	-0.11	205.9	196.6	184	198.7	1.56	11.25	18.25	6.12	1	High	High	High	High	High	High	High	High	High	High	High	High	200.5	205.9	206.2	164.6	196.6	204.7	132.4	184	186.7	210.9	198.7	186.6	1	140.3
High	Master Protein	A0A1D8PN32	Holocytochrome c-type synthase OS=Candida albicans (strain SC5314 / ATCC MYA-2876) OX=237561 GN=CYC3 PE=3 SV=1	7	20	0.772083	0.489065	0.307236	0.943	1.049	1.093	-0.08	0.07	0.13	1878.8	2089.7	2177.4	1991.5	2.71	6.46	5.72	2.64	7	High	High	High	High	High	High	High	High	High	High	High	High	1958.5	1878.8	1861.9	1956.6	2089.7	2226.9	1983.9	2177.4	2207.8	2011.7	1913.1	1991.5	1	1369.9
Medium	Master Protein	A0A1D8PT10	Uncharacterized protein OS=Candida albicans (strain SC5314 / ATCC MYA-2876) OX=237561 GN=CAALFM_CR05210WA PE=4 SV=1	1	4	0.286031	0.656341	0.307637	1.195	0.847	0.784	0.26	-0.24	-0.35	1717.6	1217.7	1127.1	1437.4	17.09	4.28	10.23	11.35	1	High	High	High	High	High	High	High	High	High	High	High	High	1389.1	1965.2	1717.6	1200.4	1217.7	1299.6	1293.2	1062.9	1127.1	1437.4	1218.5	1526	1	971.6
High	Master Protein	Q5ADR3	Phospholipid-transporting ATPase OS=Candida albicans (strain SC5314 / ATCC MYA-2876) OX=237561 GN=orf19.6778 PE=3 SV=1	4	22	0.558424	0.711366	0.309236	1.066	0.968	0.938	0.09	-0.05	-0.09	2747.9	2496.6	2419.3	2578.6	4.95	7.84	2.54	3.3	4	High	High	High	High	High	High	High	High	High	High	High	High	2601.3	2872.5	2747.9	2276.7	2496.6	2664.4	2419.3	2324.2	2437.3	2578.6	2509.1	2679.1	1	1819.5
High	Master Protein	A0A1D8PU17	Lysophospholipase OS=Candida albicans (strain SC5314 / ATCC MYA-2876) OX=237561 GN=PLB3 PE=3 SV=1	6	16	0.776913	0.158647	0.310941	1.046	1.066	1.041	0.06	0.09	0.06	2131.1	2171.7	2121.5	2038.1	1.81	1.66	3.75	3.55	6	High	High	High	High	High	High	High	High	High	High	High	High	2131.1	2146.9	2074.1	2163.3	2171.7	2229.9	2256.9	2112	2121.5	2038.1	2020.8	2156.1	1	1490.6
High	Master Protein	Q59MZ5	Formylglycinamide ribonucleotide amidotransferase OS=Candida albicans (strain SC5314 / ATCC MYA-2876) OX=237561 GN=ADE6 PE=3 SV=1	54	224	0.960306	0.356192	0.31162	0.997	1.02	1.035	0	0.03	0.05	37587.3	38428.2	39007.2	37690.2	0.73	3.08	2.33	1.05	53	High	High	High	High	High	High	High	High	High	High	High	High	37736	37587.3	37204.9	38080.7	38428.2	40309.2	38094.6	39007.2	39911.3	37490.8	37690.2	38254.9	1	26394.7
Low	Master Protein	Q59ZE6	AAA family ATPase peroxin 6 OS=Candida albicans (strain SC5314 / ATCC MYA-2876) OX=237561 GN=PEX6 PE=4 SV=1	1	7	0.99115	0.998769	0.31176	0.99	1.007	0.933	-0.01	0.01	-0.1	201.5	204.9	190	203.5	0.7	4.06	7.84	6.28	1	High	High	High	High	High	High	High	High	High	High	High	High	201.5	199.5	202.2	204.9	193.3	209.1	201.2	190	172	191.3	203.5	216.9	1	140.9
High	Master Protein	A0A1D8PJ75	Bzz1p OS=Candida albicans (strain SC5314 / ATCC MYA-2876) OX=237561 GN=BZZ1 PE=4 SV=1	2	2	0.837875	0.999992	0.312601	1.006	0.974	0.881	0.01	-0.04	-0.18	139.7	135.2	122.3	138.9	11.06	11.09	0.53	3.9	2	High	High	High	High	High	High	High	High	High	High	High	High	134.3	164.6	139.7	124.7	135.2	154.9	122.3	122.9	121.6	143	132.3	138.9	1	94
High	Master Protein	A0A1D8PL78	Crd2p OS=Candida albicans (strain SC5314 / ATCC MYA-2876) OX=237561 GN=CRD2 PE=4 SV=1	6	57	0.999985	0.997079	0.313966	1.017	0.909	0.867	0.02	-0.14	-0.21	9641.1	8617.3	8215.2	9475.5	4.91	13.2	21.7	6.75	6	High	High	High	High	High	High	High	High	High	High	High	High	9804.9	9641.1	8931	10669.2	8617.3	8493.5	5897.2	9172.4	8215.2	9475.5	8771.4	10041.7	1	6858.1
Low	Master Protein	A0A1D8PS24	Uncharacterized protein OS=Candida albicans (strain SC5314 / ATCC MYA-2876) OX=237561 GN=CAALFM_CR01720WA PE=3 SV=1	1	6	0.919983	0.930323	0.314247	0.997	1.023	0.854	0	0.03	-0.23	1181.4	1211.9	1011.6	1185.1	2.26	2.63	10.93	10.54	1	High	High	High	High	High	High	High	High	High	High	High	High	1227.9	1180.8	1181.4	1213.1	1211.9	1158	918.6	1011.6	1141.4	1185.1	1019.4	1256.3	1	858.8
Medium	Master Protein	Q5A432	Transcriptional regulatory protein GAT1 OS=Candida albicans (strain SC5314 / ATCC MYA-2876) OX=237561 GN=GAT1 PE=2 SV=1	1	1	0.946201	0.726911	0.315768	0.947	1.057	1.132	-0.08	0.08	0.18	463.3	516.9	553.8	489	10.18	2.22	14.83	6.72	1	High	High	High	High	High	High	High	High	High	High	High	High	508.6	414.6	463.3	514.6	535.8	516.9	647.5	553.8	481.6	509.4	446	489	1	355.8
High	Master Protein	A0A1D8PPB4	NDC10_II domain-containing protein OS=Candida albicans (strain SC5314 / ATCC MYA-2876) OX=237561 GN=orf19.1189 PE=4 SV=1	1	1	0.737678	0.993136	0.316427	1.076	0.989	0.909	0.11	-0.02	-0.14	187	171.9	157.9	173.8	8.52	5.8	11.31	9.59	1	High	High	High	High	High	High	High	High	High	High	High	High	187	203.6	171.7	159.2	171.9	178.7	157.9	164.1	131.9	173.8	190.2	156.9	1	130.8
High	Master Protein	Q59X74	SnoRNA-binding rRNA-processing protein OS=Candida albicans (strain SC5314 / ATCC MYA-2876) OX=237561 GN=IMP4 PE=4 SV=1	9	27	0.996895	0.336789	0.317817	1	0.952	0.912	0	-0.07	-0.13	4941.5	4706.1	4507.1	4941.3	1.99	7.92	3.82	0.92	9	High	High	High	High	High	High	High	High	High	High	High	High	4941.5	5063.3	4867.7	4913.8	4706.1	4203.6	4475.3	4793.9	4507.1	4950.4	4868	4941.3	1	3456.4
High	Master Protein	Q5APD5	Uncharacterized protein OS=Candida albicans (strain SC5314 / ATCC MYA-2876) OX=237561 GN=orf19.4830 PE=3 SV=1	7	21	0.757619	0.724854	0.318149	1.053	0.955	0.933	0.08	-0.07	-0.1	4307.9	3906.4	3816.1	4089.6	1.2	9.21	10.6	3.56	7	High	High	High	High	High	High	High	High	High	High	High	High	4307.9	4395.7	4303.4	4155.8	3906.4	3457.9	3220.3	3949.3	3816.1	3935.3	4226	4089.6	1	3013.2
High	Master Protein	A0A1D8PQW4	DUF3844 domain-containing protein OS=Candida albicans (strain SC5314 / ATCC MYA-2876) OX=237561 GN=orf19.6553 PE=4 SV=1	3	4	0.854454	0.999866	0.319397	1.097	0.954	0.873	0.13	-0.07	-0.2	1846.1	1606	1468.7	1682.8	8.38	11.55	8.03	5.89	3	High	High	High	High	High	High	High	High	High	High	High	High	1612.5	1890.8	1846.1	1606	1534.5	1900.8	1468.7	1365.1	1601.9	1682.8	1584.6	1783	1	1127.9
High	Master Protein	A0A1D8PLF1	Dolichol-phosphate mannosyltransferase subunit 3 OS=Candida albicans (strain SC5314 / ATCC MYA-2876) OX=237561 GN=DPM3 PE=3 SV=1	1	7	0.875628	0.998791	0.319544	1.044	1.039	1.15	0.06	0.06	0.2	1967.2	1958.3	2167.7	1884.3	3.99	13.79	12.62	3.49	1	High	High	High	High	High	High	High	High	High	High	High	High	2040.8	1884.1	1967.2	2095.2	1958.3	1593.1	2425.6	2167.7	1881.3	1887.2	1884.3	1773.9	1	1427.5
High	Master Protein	A0A1D8PPL4	Phosphatidylglycerophosphatase OS=Candida albicans (strain SC5314 / ATCC MYA-2876) OX=237561 GN=orf19.3449.2 PE=4 SV=1	1	2	0.967615	0.3956	0.3208	1.073	1.104	1.156	0.1	0.14	0.21	322.4	331.7	347.2	300.4	1.08	21.38	14.35	3.83	1	High	High	High	High	High	High	High	High	High	High	High	High	316.7	322.4	322.9	331.7	314.8	458.9	347.2	335.8	433.5	298.8	300.4	319.9	1	221.5
High	Master Protein	A0A1D8PKW2	Fructose-bisphosphatase OS=Candida albicans (strain SC5314 / ATCC MYA-2876) OX=237561 GN=FBP1 PE=3 SV=1	9	24	0.886352	0.489458	0.320829	0.981	1	1.027	-0.03	0	0.04	4205.6	4285.3	4399.9	4286	0.56	2.87	1.35	1.69	9	High	High	High	High	High	High	High	High	High	High	High	High	4236.3	4189.8	4205.6	4272.9	4285.3	4494.9	4306.1	4399.9	4414.8	4286	4174	4308.1	1	2963.1
High	Master Protein	O74161	Chitin biosynthesis protein CHS5 OS=Candida albicans (strain SC5314 / ATCC MYA-2876) OX=237561 GN=CHS5 PE=3 SV=2	13	30	0.999715	0.382919	0.323222	0.99	1.018	1.013	-0.02	0.03	0.02	8422.4	8666.5	8625.2	8510.9	1	1.48	0.53	2.95	13	High	High	High	High	High	High	High	High	High	High	High	High	8476.8	8311.6	8422.4	8453.5	8666.5	8680.7	8567.5	8658.3	8625.2	8510.9	8110.7	8563.1	1	5929.1
High	Master Protein	Q5A863	tRNA (guanine(26)-N(2))-dimethyltransferase OS=Candida albicans (strain SC5314 / ATCC MYA-2876) OX=237561 GN=TRM1 PE=3 SV=1	6	9	0.758289	0.142612	0.323294	1.009	0.939	0.946	0.01	-0.09	-0.08	1667.4	1552.1	1563.1	1652.5	1.81	0.71	1.46	4.07	6	High	High	High	High	High	High	High	High	High	High	High	High	1629.3	1667.4	1688.6	1565.5	1552.1	1543.5	1563.1	1555.9	1598.6	1556.3	1652.5	1683.4	1	1139.6
High	Master Protein	A0A1D8PHF8	Wh11p OS=Candida albicans (strain SC5314 / ATCC MYA-2876) OX=237561 GN=WH11 PE=4 SV=1	10	85	0.762268	0.968436	0.324404	0.899	0.93	0.895	-0.15	-0.11	-0.16	35496	36727.4	35349.6	39505.7	8.58	11.84	17.64	5.27	10	High	High	High	High	High	High	High	High	High	High	High	High	39378.1	33268.7	35496	43113.9	36727.4	34402.8	26823.5	38144.9	35349.6	41798.1	37628	39505.7	1	27543.3
High	Master Protein	A0A1D8PK71	HABP4_PAI-RBP1 domain-containing protein OS=Candida albicans (strain SC5314 / ATCC MYA-2876) OX=237561 GN=orf19.5943.1 PE=4 SV=1	30	594	0.51204	0.275608	0.324721	1.061	0.958	0.943	0.09	-0.06	-0.08	66140.8	59754	58824.2	62356.5	2.45	2.19	4.73	3.02	30	High	High	High	High	High	High	High	High	High	High	High	High	63915.6	67036.4	66140.8	61502.9	59754	58925.2	63587.3	58492.5	58824.2	61968.9	65459.5	62356.5	1	44706.2
High	Master Protein	Q5A6P2	RNA cytidine acetyltransferase OS=Candida albicans (strain SC5314 / ATCC MYA-2876) OX=237561 GN=NAT10 PE=3 SV=1	39	125	0.995577	0.257345	0.324842	1.013	0.969	0.977	0.02	-0.04	-0.03	22596.2	21616.4	21794.6	22298.8	1.08	2.2	1.87	1.86	39	High	High	High	High	High	High	High	High	High	High	High	High	22303.5	22786	22596.2	21502.8	22385.3	21616.4	21540.6	22342.6	21794.6	22298.8	22199.5	22968.8	1	15600.4
High	Master Protein	A0A1D8PQW1	Proteasome core particle subunit alpha 7 OS=Candida albicans (strain SC5314 / ATCC MYA-2876) OX=237561 GN=PRE10 PE=3 SV=1	12	48	0.992824	0.143358	0.32539	1.018	0.971	0.955	0.03	-0.04	-0.07	4794.5	4574.1	4500.8	4711.9	1.42	3.85	2.46	1.72	12	High	High	High	High	High	High	High	High	High	High	High	High	4690.9	4818.7	4794.5	4637.3	4574.1	4309.9	4693.8	4500.8	4498	4711.9	4679.3	4833.9	1	3281.1
High	Master Protein	Q59N29	ATP-dependent rRNA helicase SPB4 OS=Candida albicans (strain SC5314 / ATCC MYA-2876) OX=237561 GN=SPB4 PE=3 SV=1	1	1	0.977993	0.08526	0.325505	1.075	1.284	1.229	0.1	0.36	0.3	174.9	208.9	199.9	162.7	1.63	18.96	6.94	12.63	1	High	High	High	High	High	High	High	High	High	High	High	High	174.9	172.3	178	189.6	208.9	270.6	187.6	199.9	215.5	152.3	162.7	193.5	1	122.3
Medium	Master Protein	A0A1D8PDP4	40S ribosomal protein S27 OS=Candida albicans (strain SC5314 / ATCC MYA-2876) OX=237561 GN=RPS27A PE=3 SV=1	1	3	0.852788	0.0367079	0.325549	1.018	1.097	1.043	0.03	0.13	0.06	351.5	379	360.2	345.4	4.2	0.78	5.59	0.77	1	High	High	High	High	High	High	High	High	High	High	High	High	368.5	339	351.5	378.6	383.9	379	345.6	385.8	360.2	345.4	347.1	341.9	1	257.8
High	Master Protein	A0A1D8PPI6	Cip1p OS=Candida albicans (strain SC5314 / ATCC MYA-2876) OX=237561 GN=CIP1 PE=4 SV=1	6	15	0.692083	0.189206	0.327647	1.078	1.145	1.129	0.11	0.2	0.18	1347.6	1432.6	1412.5	1250.7	1.45	4.42	8.48	6.15	6	High	High	High	High	High	High	High	High	High	High	High	High	1347.6	1378.7	1342.2	1432.6	1367.2	1493.6	1283.1	1412.5	1521.4	1250.7	1236	1380	1	942.6
High	Master Protein	Q5AD50	DNA-directed RNA polymerase I subunit OS=Candida albicans (strain SC5314 / ATCC MYA-2876) OX=237561 GN=orf19.2017 PE=3 SV=1	13	63	0.98245	0.892255	0.328008	0.989	0.974	1.013	-0.02	-0.04	0.02	10796.8	10632.9	11058.8	10917.3	1.36	1.16	0.6	2.38	13	High	High	High	High	High	High	High	High	High	High	High	High	10576.8	10853.9	10796.8	10632.9	10839.1	10618	11058.8	11093	10965.7	10917.3	10496.9	10963.6	1	7398
High	Master Protein	A0A1D8PD99	mRNA-binding ribosome biosynthesis protein OS=Candida albicans (strain SC5314 / ATCC MYA-2876) OX=237561 GN=NOP4 PE=4 SV=1	25	80	1	0.164881	0.328996	0.993	0.943	0.968	-0.01	-0.08	-0.05	14503.1	13774.3	14137.2	14606.2	1.42	2.64	4.21	1.68	25	High	High	High	High	High	High	High	High	High	High	High	High	14503.1	14743.3	14333.8	13774.3	14150.2	13423.7	13292.4	14422.7	14137.2	14248.7	14716.6	14606.2	1	10144.3
High	Master Protein	A0A1D8PM60	Uncharacterized protein OS=Candida albicans (strain SC5314 / ATCC MYA-2876) OX=237561 GN=orf19.3792 PE=3 SV=1	20	47	0.949769	0.360078	0.329889	0.975	1.055	1.045	-0.04	0.08	0.06	7190	7778.5	7703.2	7374.1	2.73	4.25	2.44	1.6	20	High	High	High	High	High	High	High	High	High	High	High	High	7518.4	7158.8	7190	7340.4	7778.5	7980.7	7901.4	7525.1	7703.2	7374.1	7265.7	7501.5	1	5258.8
Medium	Master Protein	A0A1D8PDP5	Uncharacterized protein OS=Candida albicans (strain SC5314 / ATCC MYA-2876) OX=237561 GN=orf19.2472.1 PE=4 SV=1	1	1	0.54799	0.979815	0.329941	1.045	1.02	1.044	0.06	0.03	0.06	242.8	237.1	242.5	232.4	5.57	3.54	7.5	3.18	1	High	High	High	High	High	High	High	High	High	High	High	High	263.6	237.4	242.8	229.5	246.3	237.1	241.3	274.8	242.5	241.8	227.2	232.4	1	184.3
High	Master Protein	A0A1D8PPJ1	Cic1p OS=Candida albicans (strain SC5314 / ATCC MYA-2876) OX=237561 GN=CIC1 PE=4 SV=1	21	70	0.780613	0.673632	0.330444	0.987	0.982	1.026	-0.02	-0.03	0.04	14008.4	13946.2	14563.3	14195.9	0.97	2.22	1.03	1.6	21	High	High	High	High	High	High	High	High	High	High	High	High	13959.3	14216.8	14008.4	13765.9	14373.4	13946.2	14407.8	14563.3	14708.1	14195.9	14022.6	14474.2	1	9763.9
High	Master Protein	Q59NB3	Snl1p OS=Candida albicans (strain SC5314 / ATCC MYA-2876) OX=237561 GN=SNL1 PE=4 SV=1	12	46	0.990205	0.399343	0.330871	0.984	1.047	1.061	-0.02	0.07	0.09	7450.6	7932.7	8039.7	7574.9	2.01	6.81	5.45	0.62	12	High	High	High	High	High	High	High	High	High	High	High	High	7450.6	7352	7647.6	7567.4	7932.7	8645	8039.7	7676.3	8554.4	7603.8	7574.9	7512.6	1	5211.4
High	Master Protein	A0A1D8PNN8	Cam1-1p OS=Candida albicans (strain SC5314 / ATCC MYA-2876) OX=237561 GN=CAM1-1 PE=4 SV=1	45	338	0.962646	0.231079	0.332092	1.054	0.914	0.966	0.08	-0.13	-0.05	63953.2	55478.4	58638.5	60690.4	3.6	5.61	3.35	5.71	31	High	High	High	High	High	High	High	High	High	High	High	High	60535.3	64830.8	63953.2	60954.6	55478.4	55309.3	55622.8	58638.5	59231.2	60690.4	66028.5	59330.8	1	42341.8
High	Master Protein	Q59US5	Bifunctional cysteine synthase/O-acetylhomoserine aminocarboxypropyltransferase OS=Candida albicans (strain SC5314 / ATCC MYA-2876) OX=237561 GN=MET15 PE=3 SV=1	19	64	0.0572151	0.314391	0.332144	1.075	1.05	1.049	0.1	0.07	0.07	12371.5	12083.2	12076.8	11508.2	0.99	2.03	1.94	3.92	19	High	High	High	High	High	High	High	High	High	High	High	High	12371.5	12379.7	12165.4	12197.1	12083.2	11729.5	12076.8	12170.6	11729.9	11508.2	11146	12046.8	1	8653.3
High	Master Protein	A0A1D8PIF8	Leu42p OS=Candida albicans (strain SC5314 / ATCC MYA-2876) OX=237561 GN=LEU42 PE=3 SV=1	17	68	0.313231	0.135488	0.33245	1.057	1.06	1.07	0.08	0.08	0.1	6763.3	6777	6845.6	6396	1.12	2.96	3.32	2.46	17	High	High	High	High	High	High	High	High	High	High	High	High	6638.2	6773.6	6763.3	6777	6638.9	7036	6852.8	6462.6	6845.6	6396	6350.4	6646.2	1	4643.1
High	Master Protein	Q5AMG5	5'-3' exoribonuclease 2 OS=Candida albicans (strain SC5314 / ATCC MYA-2876) OX=237561 GN=RAT1 PE=3 SV=4	14	22	0.659366	0.759606	0.33316	1.034	0.973	0.931	0.05	-0.04	-0.1	2052.5	1932	1847.7	1985	5.46	1.56	3.11	2.32	13	High	High	High	High	High	High	High	High	High	High	High	High	1932.2	2155.4	2052.5	1891.2	1932	1949.8	1845.9	1948.2	1847.7	1985	1930.1	2021.2	1	1351.5
High	Master Protein	A0A1D8PIS4	Trehalose 6-phosphate synthase/phosphatase complex subunit OS=Candida albicans (strain SC5314 / ATCC MYA-2876) OX=237561 GN=TPS3 PE=1 SV=1	19	40	0.014891	0.535655	0.333228	1.083	1.031	0.975	0.12	0.04	-0.04	6446.2	6133.6	5801.9	5951.4	1.22	3.94	1.22	0.99	19	High	High	High	High	High	High	High	High	High	High	High	High	6335	6485.4	6446.2	6355.2	5872.9	6133.6	5692.7	5801.9	5824.4	5914.6	5951.4	6030.1	1	4431
High	Master Protein	Q5AI07	Aldedh domain-containing protein OS=Candida albicans (strain SC5314 / ATCC MYA-2876) OX=237561 GN=orf19.3045 PE=3 SV=1	17	32	0.87788	0.722383	0.333294	1.005	1.002	1.039	0.01	0	0.05	4710.2	4693.3	4866.7	4685.1	1.53	4.56	1.86	1.19	17	High	High	High	High	High	High	High	High	High	High	High	High	4829.2	4698	4710.2	4693.3	4620.7	5029	4941	4761.5	4866.7	4609.6	4685.1	4718.1	1	3377.8
High	Master Protein	A0A1D8PJS2	Adrenodoxin OS=Candida albicans (strain SC5314 / ATCC MYA-2876) OX=237561 GN=YAH1 PE=4 SV=1	3	13	0.999935	0.74001	0.334753	1.021	0.932	0.938	0.03	-0.1	-0.09	3006.4	2744.2	2761.6	2945.3	1.45	10.43	19.26	4.33	3	High	High	High	High	High	High	High	High	High	High	High	High	3069.8	3006.4	2985.7	3012.8	2744.2	2443.1	1998	2920.3	2761.6	2917.9	3155.9	2945.3	1	2147.2
High	Master Protein	P10613	Lanosterol 14-alpha demethylase OS=Candida albicans (strain SC5314 / ATCC MYA-2876) OX=237561 GN=ERG11 PE=1 SV=2	28	132	0.997493	0.932713	0.33573	0.992	1.024	1.02	-0.01	0.03	0.03	20938.5	21593.2	21515.3	21096.7	0.99	3.06	5.17	1.82	28	High	High	High	High	High	High	High	High	High	High	High	High	20783.3	20938.5	21193.3	20671.1	21593.2	21936.9	23410.7	21515.3	21360.8	21096.7	20680.7	21445.6	1	14537
High	Master Protein	Q5A5Q4	Uncharacterized protein OS=Candida albicans (strain SC5314 / ATCC MYA-2876) OX=237561 GN=orf19.5345 PE=4 SV=1	16	57	0.994932	0.974346	0.336031	1.003	1.015	0.969	0	0.02	-0.05	10649.9	10786.3	10294.4	10621.7	0.41	1.64	2.64	0.86	16	High	High	High	High	High	High	High	High	High	High	High	High	10715.2	10649.9	10632.2	10786.3	10799.9	10489.4	10164.9	10690.4	10294.4	10546.8	10621.7	10729.4	1	7494.8
High	Master Protein	A0A1D8PPL1	Histone acetyltransferase OS=Candida albicans (strain SC5314 / ATCC MYA-2876) OX=237561 GN=TRA1 PE=4 SV=1	14	19	0.0550724	0.963376	0.336816	0.918	1.023	1.048	-0.12	0.03	0.07	4662	5191.5	5322.2	5076.3	5.35	2.52	0.19	2.19	14	High	High	High	High	High	High	High	High	High	High	High	High	4958.3	4458.6	4662	5245	5191.5	4998.9	5322.2	5334.7	5314.6	5076.3	5197.5	4974.9	1	3468.1
High	Master Protein	Q5A900	Ribosomal 40S subunit protein S2 OS=Candida albicans (strain SC5314 / ATCC MYA-2876) OX=237561 GN=RPS21 PE=3 SV=1	20	236	0.958236	0.221353	0.336938	1.014	0.948	0.945	0.02	-0.08	-0.08	61202.7	57233	57024.5	60374.9	2.42	4.02	2.51	3.67	20	High	High	High	High	High	High	High	High	High	High	High	High	59699.1	62655.9	61202.7	59331.6	54747.9	57233	56494.5	57024.5	59225.2	60374.9	62644.6	58206.5	1	41756.9
High	Master Protein	Q5A222	NADH-ubiquinone oxidoreductase OS=Candida albicans (strain SC5314 / ATCC MYA-2876) OX=237561 GN=CAALFM_CR02620CA PE=3 SV=1	15	68	0.608912	0.0993322	0.337223	1.027	0.953	0.953	0.04	-0.07	-0.07	16271.1	15086.3	15098	15838.4	3.04	4.69	1.77	1.45	15	High	High	High	High	High	High	High	High	High	High	High	High	15837.3	16827.7	16271.1	15272.6	15086.3	13989.1	15098	15385.4	14850.1	15560.2	15838.4	16014.7	1	11077.5
High	Master Protein	A0A1D8PMM8	Uncharacterized protein OS=Candida albicans (strain SC5314 / ATCC MYA-2876) OX=237561 GN=orf19.3139 PE=4 SV=1	9	22	0.99855	0.545953	0.337426	1.006	0.959	0.972	0.01	-0.06	-0.04	2307.1	2200.9	2229.5	2294.4	1.88	2.63	4.2	2.62	9	High	High	High	High	High	High	High	High	High	High	High	High	2336.9	2251.9	2307.1	2195.3	2299.7	2200.9	2229.5	2291.1	2108.5	2294.4	2254.6	2373.6	1	1634.5
High	Master Protein	Q9B8C9	NADH-ubiquinone oxidoreductase chain 5 OS=Candida albicans (strain SC5314 / ATCC MYA-2876) OX=237561 GN=NAD5 PE=3 SV=2	5	11	0.164775	0.931923	0.338187	0.965	1.006	1.062	-0.05	0.01	0.09	1372.6	1431.1	1510.5	1422.2	1.25	3.23	1.91	3.35	5	High	High	High	High	High	High	High	High	High	High	High	High	1389.2	1355	1372.6	1467.2	1375.8	1431.1	1510.5	1465.6	1518.7	1408	1422.2	1497.8	1	971.7
High	Master Protein	Q5AB84	Uncharacterized protein OS=Candida albicans (strain SC5314 / ATCC MYA-2876) OX=237561 GN=orf19.6090 PE=4 SV=1	20	173	0.868458	0.24328	0.338593	0.984	0.961	0.984	-0.02	-0.06	-0.02	39831.4	38913.9	39815.9	40475.4	0.65	3.26	4.34	1.42	20	High	High	High	High	High	High	High	High	High	High	High	High	39667.8	40172.7	39831.4	38913.9	39867.5	37365	37012.5	39815.9	40056.9	40109.1	41240.7	40475.4	1	27745.9
High	Master Protein	Q5AEI3	mRNA stability protein OS=Candida albicans (strain SC5314 / ATCC MYA-2876) OX=237561 GN=orf19.285 PE=3 SV=1	5	18	0.306222	0.980119	0.338722	1.099	1.063	0.968	0.14	0.09	-0.05	1848.7	1787.6	1628.8	1682.1	1.55	6.09	4.76	4.57	5	High	High	High	High	High	High	High	High	High	High	High	High	1866.5	1848.7	1810.7	1819.7	1787.6	1622	1628.8	1667.4	1520.2	1662.9	1682.1	1807.3	1	1305.5
Low	None	Q59P39	Transcriptional regulator EFH1 OS=Candida albicans (strain SC5314 / ATCC MYA-2876) OX=237561 GN=EFH1 PE=2 SV=1	1	1	0.122034	0.978703	0.339089	1.308	0.953	0.822	0.39	-0.07	-0.28	619.6	451.4	389.2	473.7	9.83	4.42	8.43	17.83	1	High	High	High	High	High	High	High	High	High	High	High	High	536.1	650.5	619.6	440.5	451.4	479.6	440.5	376.4	389.2	473.7	395.9	566.3	1	375
High	Master Protein	A0A1D8PCI5	Arginyl-tRNA synthetase OS=Candida albicans (strain SC5314 / ATCC MYA-2876) OX=237561 GN=orf19.3341 PE=3 SV=1	55	277	0.972661	0.0874771	0.339421	1.007	0.967	0.976	0.01	-0.05	-0.03	60857.8	58468.3	59015.8	60437.1	0.33	2.81	1.64	1.65	54	High	High	High	High	High	High	High	High	High	High	High	High	60602	61004.6	60857.8	59269.3	58468.3	56135.8	59015.8	59687	57783.6	59447	61437.3	60437.1	1	42388.5
High	Master Protein	A0A1D8PD31	RNA-binding RNA processing protein OS=Candida albicans (strain SC5314 / ATCC MYA-2876) OX=237561 GN=RPP1 PE=3 SV=1	2	2	0.9966	0.938867	0.340152	1.047	1.015	1.136	0.07	0.02	0.18	296.4	287.4	321.5	283.2	2.33	15.21	18.56	5.75	2	High	High	High	High	High	High	High	High	High	High	High	High	285.7	296.4	298.5	287.4	272.2	359.4	298.9	321.5	419.9	283.2	274.3	306.3	1	199.9
High	Master Protein	Q59MN2	Glycogen debrancher OS=Candida albicans (strain SC5314 / ATCC MYA-2876) OX=237561 GN=GDB1 PE=3 SV=1	16	26	0.0469702	0.197507	0.340528	1.04	1.015	1.018	0.06	0.02	0.03	4321.9	4216.5	4230.4	4155	0.36	2.37	1.92	1.38	16	High	High	High	High	High	High	High	High	High	High	High	High	4321.9	4307.2	4338.1	4216.5	4192.7	4378.7	4230.4	4160.3	4322.6	4069.5	4155	4178.1	1	3023
Low	Master Protein	P02539	Keratin, type II microfibrillar (Fragment) CONTAMINANT OS=Ovis aries PE=1 SV=1	1	3	0.999917	0.982907	0.341792	1.004	0.987	1.181	0.01	-0.02	0.24	531	522.1	624.6	529.1	5.86	9.54	8.75	5.24	1	High	High	High	High	High	High	High	High	High	High	High	High	503.4	565.8	531	514.5	608.6	522.1	624.6	633.7	538.7	529.1	510.8	565.9	1	352.1
Low	Master Protein Candidate	O43790	Keratin, type II cuticular Hb6 CONTAMINANT OS=Homo sapiens GN=KRT86 PE=1 SV=1	1	3	0.999917	0.982907	0.341792	1.004	0.987	1.181	0.01	-0.02	0.24	531	522.1	624.6	529.1	5.86	9.54	8.75	5.24	1	High	High	High	High	High	High	High	High	High	High	High	High	503.4	565.8	531	514.5	608.6	522.1	624.6	633.7	538.7	529.1	510.8	565.9	1	352.1
Low	Master Protein Candidate	P78386	Keratin, type II cuticular Hb5 CONTAMINANT OS=Homo sapiens GN=KRT85 PE=1 SV=1	1	3	0.999917	0.982907	0.341792	1.004	0.987	1.181	0.01	-0.02	0.24	531	522.1	624.6	529.1	5.86	9.54	8.75	5.24	1	High	High	High	High	High	High	High	High	High	High	High	High	503.4	565.8	531	514.5	608.6	522.1	624.6	633.7	538.7	529.1	510.8	565.9	1	352.1
Low	Master Protein Candidate	P78385	Keratin, type II cuticular Hb3 CONTAMINANT OS=Homo sapiens GN=KRT83 PE=1 SV=2	1	3	0.999917	0.982907	0.341792	1.004	0.987	1.181	0.01	-0.02	0.24	531	522.1	624.6	529.1	5.86	9.54	8.75	5.24	1	High	High	High	High	High	High	High	High	High	High	High	High	503.4	565.8	531	514.5	608.6	522.1	624.6	633.7	538.7	529.1	510.8	565.9	1	352.1
High	Master Protein	A0A1D8PPY5	RNA exonuclease OS=Candida albicans (strain SC5314 / ATCC MYA-2876) OX=237561 GN=orf19.5527 PE=4 SV=1	2	6	0.126718	0.740921	0.342309	1.388	0.814	0.821	0.47	-0.3	-0.28	1857.6	1090	1099	1338.3	15.05	15.47	7.67	12.45	2	High	High	High	High	High	High	High	High	High	High	High	High	1422.5	1857.6	1883.7	1044.9	1090	1378.9	1137.2	979.6	1099	1338.3	1128.4	1448.3	1	995
High	Master Protein	Q59NP5	Secreted beta-glucosidase SUN41 OS=Candida albicans (strain SC5314 / ATCC MYA-2876) OX=237561 GN=SUN41 PE=1 SV=2	2	6	0.999588	0.964775	0.342927	1.031	1.019	0.947	0.04	0.03	-0.08	2147.6	2122.9	1972.7	2083	2.8	4.53	8.08	4.12	2	High	High	High	High	High	High	High	High	High	High	High	High	2147.6	2055.7	2167.1	2122.9	2131.5	1964.7	2112.4	1972.7	1796.2	2213.3	2083	2048.1	1	1502.2
High	Master Protein	O74198	Sterol 24-C-methyltransferase OS=Candida albicans (strain SC5314 / ATCC MYA-2876) OX=237561 GN=ERG6 PE=1 SV=2	26	165	0.372083	0.101805	0.343253	0.975	0.972	0.988	-0.04	-0.04	-0.02	25467.5	25385.1	25806.8	26112.1	1.12	1.92	1.76	0.4	26	High	High	High	High	High	High	High	High	High	High	High	High	25467.5	25410.9	25932.8	24797	25763.8	25385.1	25880.8	25806.8	25068.1	26028	26112.1	26236.4	1	17813.4
High	Master Protein	Q8TGH6	Guanosine-diphosphatase OS=Candida albicans (strain SC5314 / ATCC MYA-2876) OX=237561 GN=GDA1 PE=1 SV=1	21	51	0.998464	0.30519	0.343382	1.005	0.975	0.954	0.01	-0.04	-0.07	6621	6422	6285.8	6587.3	1.06	4.36	4.69	1.51	21	High	High	High	High	High	High	High	High	High	High	High	High	6733.3	6621	6603.8	6422	6483.6	5980.3	6620.3	6285.8	6030.6	6548	6737.4	6587.3	1	4709.6
High	Master Protein	Q5A0W0	Imp2'p OS=Candida albicans (strain SC5314 / ATCC MYA-2876) OX=237561 GN=orf19.3136 PE=4 SV=1	7	14	0.455053	0.918662	0.343438	1.066	1.009	0.948	0.09	0.01	-0.08	3571.8	3379.8	3177	3350.7	1.59	2.77	6.72	4.46	7	High	High	High	High	High	High	High	High	High	High	High	High	3669.1	3568.6	3571.8	3400.8	3379.8	3231.1	3437	3177	3009.3	3350.7	3303.2	3587.4	1	2566.4
Medium	Master Protein	A0A1D8PQL4	Threonylcarbamoyl-AMP synthase OS=Candida albicans (strain SC5314 / ATCC MYA-2876) OX=237561 GN=orf19.7088 PE=3 SV=1	1	1	0.0666305	0.402182	0.343463	0.848	1.06	1.099	-0.24	0.08	0.14	94.5	118.1	122.5	111.4	4.62	3.7	4.29	7.71	1	High	High	High	High	High	High	High	High	High	High	High	High	102.2	94.5	94.4	123.5	114.8	118.1	113.6	122.5	122.5	101.8	118.9	111.4	1	71.5
High	Master Protein	Q9B8D5	ATP synthase subunit 9, mitochondrial OS=Candida albicans (strain SC5314 / ATCC MYA-2876) OX=237561 GN=ATP9 PE=3 SV=1	1	1	0.908108	0.721037	0.344366	1.125	1.141	1.177	0.17	0.19	0.24	379.2	384.4	396.8	337	6.28	13.65	8.63	10.65	1	High	High	High	High	High	High	High	High	High	High	High	High	349.9	396.4	379.2	384.4	445.1	339.1	452.6	396.8	386.5	337	331.6	399.8	1	244.7
High	Master Protein	A0A1D8PQP8	RNA-processing protein OS=Candida albicans (strain SC5314 / ATCC MYA-2876) OX=237561 GN=orf19.7041 PE=4 SV=1	4	9	0.378738	0.854498	0.34445	0.984	1.033	1.06	-0.02	0.05	0.08	1101	1155.6	1186	1118.7	3.6	1.24	2.11	2.69	4	High	High	High	High	High	High	High	High	High	High	High	High	1101	1047	1123.2	1132.4	1158.2	1155.6	1188.5	1186	1144.5	1106.7	1164.4	1118.7	1	770.1
High	Master Protein	P43072	Transcription factor IIIB 70 kDa subunit OS=Candida albicans (strain SC5314 / ATCC MYA-2876) OX=237561 GN=TDS4 PE=3 SV=1	3	4	0.992914	0.992365	0.345996	0.999	0.992	0.89	0	-0.01	-0.17	190.7	189.5	169.8	190.9	7.81	5.37	9.63	2.81	3	High	High	High	High	High	High	High	High	High	High	High	High	208.2	190.7	178.3	194.6	189.5	175.3	169.8	189	156	183.3	193.5	190.9	1	145.6
High	Master Protein	A0A1D8PH78	Farnesyl pyrophosphate synthase OS=Candida albicans (strain SC5314 / ATCC MYA-2876) OX=237561 GN=ERG20 PE=1 SV=1	18	65	0.404826	0.988204	0.346327	1.014	0.986	0.965	0.02	-0.02	-0.05	11462.5	11148.1	10905.9	11302.8	0.91	2.19	1.59	1.78	18	High	High	High	High	High	High	High	High	High	High	High	High	11548.2	11462.5	11340.1	10900	11148.1	11388.3	11103.2	10905.9	10756	10963.6	11314.2	11302.8	1	8077.5
High	Master Protein	Q5A5F3	Uncharacterized protein OS=Candida albicans (strain SC5314 / ATCC MYA-2876) OX=237561 GN=orf19.5129 PE=4 SV=1	2	3	0.964825	0.624286	0.346345	1.046	1.078	1.168	0.06	0.11	0.22	219	225.6	244.5	209.4	5.78	2.32	9.51	9.37	1	High	High	High	High	High	High	High	High	High	High	High	High	202.1	219	226.4	220.9	231.4	225.6	208.8	249.8	244.5	209.4	190.9	230.2	1	141.3
High	Master Protein	A0A1D8PEB8	Uncharacterized protein OS=Candida albicans (strain SC5314 / ATCC MYA-2876) OX=237561 GN=orf19.5114.1 PE=4 SV=1	3	7	0.10827	0.987844	0.347701	0.789	1.1	1.203	-0.34	0.14	0.27	2008.6	2798.8	3062.2	2545	12.4	9.26	5.8	8.23	3	High	High	High	High	High	High	High	High	High	High	High	High	2444.2	1964.2	2008.6	2798.8	2820.6	2382.5	3076.8	3062.2	2771.6	2839.1	2545	2422.6	1	1709.6
High	Master Protein	A0A1D8PE67	Bifunctional aminoimidazole ribotide synthase/glycinamide ribotide synthase OS=Candida albicans (strain SC5314 / ATCC MYA-2876) OX=237561 GN=ADE5,7 PE=3 SV=1	37	189	0.966643	0.26086	0.348045	0.994	1.026	1.036	-0.01	0.04	0.05	28271.7	29179	29460.8	28436	1.34	3.52	2.5	1.24	37	High	High	High	High	High	High	High	High	High	High	High	High	27799.8	28544.2	28271.7	28783.8	29179	30753.6	28690.2	29460.8	30160.7	28106.4	28436	28810.4	1	19444.7
High	Master Protein	Q59RQ6	Dihydrolipoyl dehydrogenase OS=Candida albicans (strain SC5314 / ATCC MYA-2876) OX=237561 GN=LPD1 PE=3 SV=1	32	248	0.752127	0.469091	0.348851	1.022	1.018	1.025	0.03	0.03	0.04	47737.9	47563.1	47905.3	46723.9	1.29	1.52	2.27	1.41	32	High	High	High	High	High	High	High	High	High	High	High	High	46771.5	47911.9	47737.9	47242.5	47563.1	48626.9	47905.3	46932.6	49110.7	46227.6	47539.2	46723.9	1	32714.6
High	Master Protein	Q5AI79	Synaptobrevin homolog YKT6 OS=Candida albicans (strain SC5314 / ATCC MYA-2876) OX=237561 GN=YKT6 PE=3 SV=1	16	46	0.0155196	0.978983	0.348905	1.058	1.012	0.982	0.08	0.02	-0.03	9069.3	8676.3	8421.7	8572.5	2.68	0.59	0.58	2.52	16	High	High	High	High	High	High	High	High	High	High	High	High	9007.5	9460.5	9069.3	8626.1	8676.3	8727.9	8338.4	8421.7	8422.5	8572.5	8442.6	8866.7	1	6300.4
High	Master Protein	Q59M49	mRNA-binding ribosome synthesis protein OS=Candida albicans (strain SC5314 / ATCC MYA-2876) OX=237561 GN=NOC2 PE=3 SV=1	24	73	0.506433	1	0.349216	0.977	1.01	1.037	-0.03	0.01	0.05	14916.3	15424.8	15834.4	15271.9	1.1	2.04	3.56	1.2	24	High	High	High	High	High	High	High	High	High	High	High	High	15062	14916.3	14734.3	14944.4	15424.8	15528.9	15227.5	15834.4	16350.8	15271.9	15131.3	15495.3	1	10535.2
High	Master Protein	Q59V93	Very-long-chain 3-oxoacyl-CoA reductase OS=Candida albicans (strain SC5314 / ATCC MYA-2876) OX=237561 GN=CAALFM_CR06070WA PE=3 SV=3	10	23	0.772669	0.673589	0.349241	0.934	1.038	1.069	-0.1	0.05	0.1	3088.7	3433.4	3534.1	3307	6.37	4.46	1.67	6.27	10	High	High	High	High	High	High	High	High	High	High	High	High	3368	2979.5	3088.7	3275.1	3433.4	3580.9	3534.1	3567.7	3453.5	3459.6	3053.1	3307	1	2355.7
Medium	Master Protein	A0A1D8PK79	Smi1bp OS=Candida albicans (strain SC5314 / ATCC MYA-2876) OX=237561 GN=SMI1B PE=3 SV=1	1	3	0.999994	0.881812	0.349459	0.968	0.841	0.732	-0.05	-0.25	-0.45	61.8	53.7	46.8	63.9	7.34	27.77	15.58	9.42	1	High	High	High	High	High	High	High	High	High	High	High	High	66.7	61.8	57.6	44	53.7	75.3	46.8	57.8	43	67.3	63.9	55.9	1	46.7
High	Master Protein	A0A1D8PK97	Chs4p OS=Candida albicans (strain SC5314 / ATCC MYA-2876) OX=237561 GN=CHS4 PE=4 SV=1	7	15	0.969354	0.999013	0.349526	0.989	0.988	0.968	-0.02	-0.02	-0.05	1071.1	1069.5	1048.2	1082.7	0.71	3.39	3.1	4.67	7	High	High	High	High	High	High	High	High	High	High	High	High	1079.1	1063.9	1071.1	1065.1	1069.5	1131	997.3	1056.4	1048.2	1035.4	1082.7	1136.7	1	754.8
High	None	Q5ANK4	zinc_ribbon_16 domain-containing protein OS=Candida albicans (strain SC5314 / ATCC MYA-2876) OX=237561 GN=orf19.5897 PE=3 SV=1	1	6	0.331445	0.593251	0.349943	1.117	0.971	0.926	0.16	-0.04	-0.11	3917.4	3403.4	3247.1	3506.7	4.44	7.45	6.24	1.47	1	High	High	High	High	High	High	High	High	High	High	High	High	3626	3922.3	3917.4	3537.5	3403.4	3056.4	3062.4	3468.6	3247.1	3506.7	3580.5	3481	1	2536.3
High	Master Protein	A0A1D8PPV5	Coatomer subunit beta' OS=Candida albicans (strain SC5314 / ATCC MYA-2876) OX=237561 GN=SEC27 PE=3 SV=1	33	92	0.79464	0.608811	0.350677	1.012	1.016	1.021	0.02	0.02	0.03	16124.5	16198	16271.5	15937.4	0.49	1.01	1.75	1.21	33	High	High	High	High	High	High	High	High	High	High	High	High	15990.7	16124.5	16129.2	16258.7	16198	15950.9	16271.5	16472.1	15911.5	15744.6	15937.4	16129.1	1	11184.8
High	Master Protein	A0A1D8PKV4	Fumarate hydratase OS=Candida albicans (strain SC5314 / ATCC MYA-2876) OX=237561 GN=FUM12 PE=3 SV=1	27	151	0.848476	0.944306	0.351218	0.988	1.008	1.021	-0.02	0.01	0.03	27614.9	28185	28538.2	27956.4	0.51	3.33	1.87	0.27	24	High	High	High	High	High	High	High	High	High	High	High	High	27509.3	27614.9	27789.3	28185	28398.8	26703.3	28538.2	29415.8	28433.1	28081.6	27945.6	27956.4	1	19241.6
High	Master Protein	A0A1D8PIS7	tRNA methylation protein OS=Candida albicans (strain SC5314 / ATCC MYA-2876) OX=237561 GN=orf19.5365 PE=4 SV=1	1	1	0.999996	0.901051	0.35141	1.062	1.084	1.243	0.09	0.12	0.31	86.5	88.3	101.3	81.5	6.01	10.45	18.54	14.21	1	High	High	High	High	High	High	High	High	High	High	High	High	92.6	86.5	82.1	87.4	88.3	104.8	88.6	101.3	127.1	81.5	78.9	101.6	1	64.7
High	Master Protein	Q59LF3	Regulator of cytoskeleton and endocytosis RVS167 OS=Candida albicans (strain SC5314 / ATCC MYA-2876) OX=237561 GN=RVS167 PE=3 SV=2	11	27	0.185751	0.640888	0.352062	1.049	0.983	0.975	0.07	-0.02	-0.04	4443.6	4164.5	4130.6	4234.6	0.38	2.38	3.05	2.61	11	High	High	High	High	High	High	High	High	High	High	High	High	4443.6	4467	4434.3	4262.5	4164.5	4064.4	4239.3	4130.6	3988.7	4234.6	4165.3	4382.7	1	3108.1
High	Master Protein	Q59Z11	Actin-related protein 3 OS=Candida albicans (strain SC5314 / ATCC MYA-2876) OX=237561 GN=ARP3 PE=3 SV=1	20	67	0.586798	0.540716	0.352467	1.031	0.948	0.932	0.04	-0.08	-0.1	16802.9	15435.7	15189.1	16290.4	0.74	5.99	3.49	0.82	20	High	High	High	High	High	High	High	High	High	High	High	High	16802.9	17006	16777.1	16663	15435.7	14824.4	15189.1	16079.9	15108.7	16357.6	16290.4	16102	1	11752.9
High	Master Protein	A0A1D8PK69	Uso6p OS=Candida albicans (strain SC5314 / ATCC MYA-2876) OX=237561 GN=USO6 PE=4 SV=1	25	48	0.827397	0.921814	0.352664	1.037	0.999	0.979	0.05	0	-0.03	8598.5	8282.3	8123.4	8293.6	0.61	3.81	2.8	3.65	25	High	High	High	High	High	High	High	High	High	High	High	High	8685.8	8590.1	8598.5	8282.3	8658.7	8028.1	8123.4	8300.7	7850.5	8293.6	8251.6	8805.5	1	6075.4
High	Master Protein	Q5AAW3	ATP-dependent RNA helicase DHH1 OS=Candida albicans (strain SC5314 / ATCC MYA-2876) OX=237561 GN=DHH1 PE=3 SV=1	26	79	0.464724	0.995862	0.353223	0.982	1.005	1.022	-0.03	0.01	0.03	14470.9	14810.5	15072.3	14743.1	1.97	1.02	1.28	0.41	26	High	High	High	High	High	High	High	High	High	High	High	High	14777.7	14207.5	14470.9	14585.3	14870.8	14810.5	15072.3	15145.7	14781.7	14766.5	14652	14743.1	1	10336.4
High	Master Protein	A0A1D8PGA6	Proteasome regulatory particle lid subunit OS=Candida albicans (strain SC5314 / ATCC MYA-2876) OX=237561 GN=RPN9 PE=3 SV=1	17	47	0.901219	0.669407	0.353402	0.994	0.988	1.012	-0.01	-0.02	0.02	9723.7	9666	9897.9	9779.2	0.5	0.05	2.2	0.61	17	High	High	High	High	High	High	High	High	High	High	High	High	9751	9657	9723.7	9671.8	9663.2	9666	10177.3	9747.1	9897.9	9711.4	9779.2	9830.6	1	6820.4
High	Master Protein	A0A1D8PT04	Mitochondrial 2-oxodicarboxylate carrier OS=Candida albicans (strain SC5314 / ATCC MYA-2876) OX=237561 GN=CAALFM_CR05480WA PE=3 SV=1	8	17	0.753081	0.99957	0.35488	0.956	1.043	1.094	-0.06	0.06	0.13	2300.9	2508.2	2630.9	2405.9	3.02	7.64	4.12	0.78	8	High	High	High	High	High	High	High	High	High	High	High	High	2400.1	2264.4	2300.9	2518.8	2508.2	2194.9	2655.9	2630.9	2460.3	2433.1	2405.9	2397.2	1	1678.8
High	Master Protein	A0A1D8PFW5	RBR-type E3 ubiquitin transferase OS=Candida albicans (strain SC5314 / ATCC MYA-2876) OX=237561 GN=orf19.7224 PE=4 SV=1	3	3	0.388536	0.849607	0.356433	1.223	1.177	0.949	0.29	0.24	-0.08	43.4	41.8	33.7	35.5	16.07	2.11	14.06	14.77	3	High	High	High	High	High	High	High	High	High	High	High	High	43.4	54.6	40.6	40.9	41.8	42.6	35.6	27	33.7	35.5	45.2	35.2	1	30.3
High	Master Protein	A0A1D8PQQ3	Alpha-1,4 glucan phosphorylase OS=Candida albicans (strain SC5314 / ATCC MYA-2876) OX=237561 GN=GPH1 PE=3 SV=1	55	309	0.314366	0.36285	0.35704	1.06	1.052	1.035	0.08	0.07	0.05	40975.4	40676.6	40022.2	38671.8	2.94	3.56	4.78	3.5	54	High	High	High	High	High	High	High	High	High	High	High	High	39402.6	41750.3	40975.4	40676.6	39075.4	41955	42762.5	39012.4	40022.2	38671.8	37015.1	39684.3	1	27560.4
High	Master Protein	A0A1D8PDG0	Methyltransf_11 domain-containing protein OS=Candida albicans (strain SC5314 / ATCC MYA-2876) OX=237561 GN=orf19.752 PE=4 SV=1	9	16	0.0321754	0.729482	0.357518	1.068	1.033	0.961	0.1	0.05	-0.06	3026.4	2927.1	2721.7	2833.2	2.18	2.23	1.07	3.83	9	High	High	High	High	High	High	High	High	High	High	High	High	3000.6	3126.6	3026.4	2945.9	2825.5	2927.1	2716.9	2721.7	2769.9	2732.5	2833.2	2949.8	1	2098.8
High	Master Protein	A0A1D8PKQ6	Serine/threonine protein kinase OS=Candida albicans (strain SC5314 / ATCC MYA-2876) OX=237561 GN=FUN31 PE=4 SV=1	1	2	0.711765	0.938155	0.357524	1.056	0.973	0.826	0.08	-0.04	-0.28	46.7	43	36.5	44.2	13.25	13.39	9.5	5.17	1	High	High	High	High	High	High	High	High	High	High	High	High	55.9	46.7	43.5	43	43	53.8	42.1	35.4	36.5	41.8	44.2	46.4	1	39.1
High	Master Protein	Q5APH1	Uncharacterized protein OS=Candida albicans (strain SC5314 / ATCC MYA-2876) OX=237561 GN=orf19.4793 PE=3 SV=1	8	24	0.999671	0.958227	0.357688	0.985	0.984	0.942	-0.02	-0.02	-0.09	3876.6	3874	3706.9	3937	1.35	4.65	5.42	2.97	8	High	High	High	High	High	High	High	High	High	High	High	High	3831.9	3936.2	3876.6	3610.7	3947.9	3874	3441.2	3829.1	3706.9	3737.7	3937	3937.2	1	2680.3
High	Master Protein	Q5ANE4	SnoRNA-binding rRNA-processing protein OS=Candida albicans (strain SC5314 / ATCC MYA-2876) OX=237561 GN=NOP14 PE=3 SV=1	11	34	0.83505	0.533801	0.358052	0.99	0.949	0.954	-0.01	-0.07	-0.07	5928.9	5685.2	5712.7	5988.2	1.24	4.02	5.01	2.14	11	High	High	High	High	High	High	High	High	High	High	High	High	5824.7	5928.9	5965.6	5685.2	6087.9	5679.9	5500.5	6071.3	5712.7	5956.9	5988.2	6195.3	1	4074.1
High	Master Protein	A0A1D8PFP3	5'-3' exoribonuclease 1 OS=Candida albicans (strain SC5314 / ATCC MYA-2876) OX=237561 GN=KEM1 PE=3 SV=1	31	73	0.861617	0.261533	0.358752	1.007	1.011	1.022	0.01	0.02	0.03	10662.6	10711.2	10826.5	10590.5	0.36	2.63	0.87	2.16	31	High	High	High	High	High	High	High	High	High	High	High	High	10716.8	10643.2	10662.6	10692.7	10711.2	11196.2	10730	10826.5	10919	10313.3	10590.5	10766.7	1	7495.9
High	Master Protein	Q5A034	DNA replication licensing factor MCM2 OS=Candida albicans (strain SC5314 / ATCC MYA-2876) OX=237561 GN=MCM2 PE=3 SV=1	12	21	0.171876	0.109985	0.359759	1.049	1.055	1.03	0.07	0.08	0.04	1741.1	1751.3	1710.5	1660	0.69	2.33	1.53	2.85	11	High	High	High	High	High	High	High	High	High	High	High	High	1753.8	1741.1	1729.6	1710.1	1751.3	1791.7	1755.9	1710.5	1709.7	1639.6	1660	1730.5	1	1226.7
High	Master Protein	Q5AJC2	AAA family ATPase OS=Candida albicans (strain SC5314 / ATCC MYA-2876) OX=237561 GN=AFG3 PE=3 SV=1	19	60	0.978973	0.57412	0.360165	1.015	0.971	0.969	0.02	-0.04	-0.05	8735.4	8356.5	8334.8	8602.4	0.72	3.51	1.4	2.18	17	High	High	High	High	High	High	High	High	High	High	High	High	8735.4	8776	8653.4	8230.9	8796.5	8356.5	8317.3	8529.5	8334.8	8602.4	8511.4	8873.7	1	6110
High	Master Protein	A0A1D8PG94	Mitochondrial 54S ribosomal protein YmL47 OS=Candida albicans (strain SC5314 / ATCC MYA-2876) OX=237561 GN=orf19.2019 PE=3 SV=1	6	17	0.840831	0.999929	0.36045	0.988	1.013	1.046	-0.02	0.02	0.06	4138.1	4244.9	4383.2	4190.3	2.33	4.6	1.94	1.27	6	High	High	High	High	High	High	High	High	High	High	High	High	4138.1	4225	4032.8	4244.9	4381.2	3999.5	4383.2	4472.3	4302.5	4272.2	4190.3	4171.4	1	2894.4
Medium	Master Protein	A0A1D8PK67	Uncharacterized protein OS=Candida albicans (strain SC5314 / ATCC MYA-2876) OX=237561 GN=orf19.6970 PE=4 SV=1	1	1	0.372294	0.552092	0.361057	1.104	0.902	0.857	0.14	-0.15	-0.22	491.7	401.7	381.4	445.2	7.56	4.56	9.3	11.35	1	High	High	High	High	High	High	High	High	High	High	High	High	455	529.4	491.7	401.7	409.2	374.9	423.2	351.9	381.4	445.2	383.5	481.6	1	318.2
High	Master Protein	A0A1D8PG89	Ubiquitin carboxyl-terminal hydrolase OS=Candida albicans (strain SC5314 / ATCC MYA-2876) OX=237561 GN=UBP13 PE=3 SV=1	1	1	0.421187	0.644105	0.361554	0.9	1.043	1.109	-0.15	0.06	0.15	243.6	282.2	300.1	270.6	7.11	9.01	8.72	3.1	1	High	High	High	High	High	High	High	High	High	High	High	High	267.3	243.6	232.9	274.4	282.2	323.6	278.3	300.1	330.9	270.6	281.9	265.3	1	187
High	Master Protein	A0A1D8PH91	Mitochondrial 37S ribosomal protein MRP51 OS=Candida albicans (strain SC5314 / ATCC MYA-2876) OX=237561 GN=orf19.185 PE=4 SV=1	21	59	0.999992	0.994283	0.362613	1.007	1	1.027	0.01	0	0.04	11269.8	11191.4	11497.7	11191.5	1.07	1.39	0.98	1.44	21	High	High	High	High	High	High	High	High	High	High	High	High	11269.8	11348.7	11111.6	11077.8	11387.1	11191.4	11317.8	11523	11497.7	11191.5	11120.2	11428.6	1	7882.7
High	Master Protein	A0A1D8PQD1	Alba domain-containing protein OS=Candida albicans (strain SC5314 / ATCC MYA-2876) OX=237561 GN=orf19.1082 PE=4 SV=1	1	2	0.9831	0.437189	0.363406	1.028	1.067	1.094	0.04	0.09	0.13	492.5	511.1	524.1	479.1	2.03	7.53	7.74	9.15	1	High	High	High	High	High	High	High	High	High	High	High	High	486.9	506.4	492.5	507.5	511.1	578.7	504.1	524.1	584.1	446	479.1	534.1	1	340.5
High	Master Protein	Q5A2T0	Ribosome biogenesis protein NSA1 OS=Candida albicans (strain SC5314 / ATCC MYA-2876) OX=237561 GN=NSA1 PE=3 SV=1	12	27	0.655734	0.653551	0.363447	1.03	0.955	0.953	0.04	-0.07	-0.07	2970.5	2755.2	2750.9	2885.2	1.4	1.7	3.89	5.04	12	High	High	High	High	High	High	High	High	High	High	High	High	2982.9	2970.5	2906	2818	2755.2	2725.6	2607.9	2815.2	2750.9	2705.6	2885.2	2990.8	1	2086.4
High	Master Protein	A0A1D8PEZ3	Uncharacterized protein OS=Candida albicans (strain SC5314 / ATCC MYA-2876) OX=237561 GN=orf19.2328 PE=4 SV=1	8	12	0.903096	0.292452	0.36425	1.023	1.065	1.069	0.03	0.09	0.1	1621.4	1687.6	1692.9	1584.2	1.77	5.9	4.29	0.84	8	High	High	High	High	High	High	High	High	High	High	High	High	1621.4	1651.2	1593.6	1587.9	1687.6	1786.9	1598.8	1692.9	1740.3	1584.2	1577.5	1603.3	1	1134.1
High	Master Protein	Q5A2Y7	Ribosome biogenesis protein NSA2 OS=Candida albicans (strain SC5314 / ATCC MYA-2876) OX=237561 GN=NSA2 PE=3 SV=1	9	41	0.990896	0.51833	0.366041	1.013	0.963	0.972	0.02	-0.05	-0.04	8279.5	7877.4	7949.2	8176.3	1.2	3.48	7.21	3.95	9	High	High	High	High	High	High	High	High	High	High	High	High	8132.3	8279.5	8320.6	7877.4	7902.2	7424.2	7019.3	7998.6	7949.2	7828.4	8473	8176.3	1	5688.2
High	Master Protein	Q5AGD1	Acyl-protein thioesterase 1 OS=Candida albicans (strain SC5314 / ATCC MYA-2876) OX=237561 GN=CAALFM_C502400WA PE=3 SV=2	10	37	0.994567	0.12991	0.366822	1.003	0.961	0.993	0	-0.06	-0.01	7821	7492.5	7740.4	7796.1	0.86	1.14	3.1	1.32	10	High	High	High	High	High	High	High	High	High	High	High	High	7775.6	7821	7907.7	7443.4	7610.5	7492.5	7334.9	7740.4	7746.5	7796.1	7708.7	7914.6	1	5438.7
High	Master Protein	A0A1D8PHT4	SWIB/MDM2 domain-containing protein OS=Candida albicans (strain SC5314 / ATCC MYA-2876) OX=237561 GN=SNF12 PE=4 SV=1	18	40	0.880763	0.99999	0.366983	0.981	1.001	0.986	-0.03	0	-0.02	7623.9	7776.4	7655.8	7768.4	2.02	0.11	3.2	0.63	18	High	High	High	High	High	High	High	High	High	High	High	High	7586.4	7872.8	7623.9	7788.3	7776.4	7772.7	7303.1	7767.9	7655.8	7742.9	7837.2	7768.4	1	5306.4
Low	Master Protein	A0A1D8PFI2	U4/U6-U5 snRNP complex subunit OS=Candida albicans (strain SC5314 / ATCC MYA-2876) OX=237561 GN=orf19.6356 PE=4 SV=1	1	1	0.470174	0.937239	0.369238	1.234	0.992	0.97	0.3	-0.01	-0.04	431.6	347.1	339.2	349.8	8.34	7.7	16.74	10.24	1	High	High	High	High	High	High	High	High	High	High	High	High	382	449.8	431.6	317.1	347.1	370	251.1	339.2	343.2	349.8	337	407.1	1	267.2
High	Master Protein	Q5AMN0	Proliferating cell nuclear antigen OS=Candida albicans (strain SC5314 / ATCC MYA-2876) OX=237561 GN=POL30 PE=1 SV=1	19	86	0.209633	0.21574	0.369898	0.945	1.043	1.045	-0.08	0.06	0.06	14181	15657.1	15691.1	15010.2	1.22	2	5.12	0.67	19	High	High	High	High	High	High	High	High	High	High	High	High	14464.1	14146	14181	15657.1	15529.9	16127.4	14799.6	15691.1	16395.3	15097.4	14896.2	15010.2	1	10117
High	Master Protein	Q59UG2	Protein-serine/threonine phosphatase OS=Candida albicans (strain SC5314 / ATCC MYA-2876) OX=237561 GN=SSU72 PE=3 SV=1	3	5	0.0804042	0.785983	0.369984	0.869	1.129	1.155	-0.2	0.18	0.21	974.6	1266.6	1294.9	1121.4	6.32	6.12	4.07	10.66	3	High	High	High	High	High	High	High	High	High	High	High	High	1050.4	974.6	927.1	1141.7	1266.6	1276.5	1228.9	1332	1294.9	1306	1069.6	1121.4	1	734.7
High	Master Protein	Q5A750	Transketolase OS=Candida albicans (strain SC5314 / ATCC MYA-2876) OX=237561 GN=TKL1 PE=3 SV=1	41	400	0.82388	0.344175	0.370523	1.015	1.02	1.035	0.02	0.03	0.05	52980.1	53251.6	54042.2	52208	1.09	4.21	2.43	1.28	41	High	High	High	High	High	High	High	High	High	High	High	High	52980.1	52445.9	53605	52324.7	53251.6	56652.4	55267.7	52648.7	54042.2	52208	51338.9	52648.6	1	37057.2
High	Master Protein	A0A1D8PCZ2	Uncharacterized protein OS=Candida albicans (strain SC5314 / ATCC MYA-2876) OX=237561 GN=orf19.3007.2 PE=4 SV=1	1	1	0.968087	0.556203	0.370775	1.102	1.114	1.226	0.14	0.16	0.29	68.2	68.9	75.9	61.9	7.07	21.85	10.14	10.39	1	High	High	High	High	High	High	High	High	High	High	High	High	68.2	72.6	63	64	68.9	94.9	75.9	71.5	86.9	61.9	72.6	60.2	1	47.7
Medium	Master Protein	A0A1D8PLK4	BTB_2 domain-containing protein OS=Candida albicans (strain SC5314 / ATCC MYA-2876) OX=237561 GN=orf19.2749 PE=4 SV=1	1	2	0.789182	0.390496	0.372795	1.032	1.148	0.819	0.04	0.2	-0.29	20	22.3	15.9	19.4	9.36	6.02	17.78	13.89	1	High	High	High	High	High	High	High	High	High	High	High	High	18.2	20	21.9	22.3	20.2	22.6	12.2	15.9	17.5	19.9	19.4	15.3	1	12.7
High	Master Protein	Q5ANL8	Urb2 domain-containing protein OS=Candida albicans (strain SC5314 / ATCC MYA-2876) OX=237561 GN=orf19.5884 PE=4 SV=1	4	5	0.677152	0.85719	0.372819	1.019	1.028	1.04	0.03	0.04	0.06	761.7	768.1	777.1	747.2	2.58	0.67	1.61	2.56	4	High	High	High	High	High	High	High	High	High	High	High	High	761.7	758	794.1	761	771	768.1	777.1	791.7	766.8	744.5	747.2	779.4	1	532.8
High	Master Protein	A0A1D8PFP9	DASH complex subunit DAD1 OS=Candida albicans (strain SC5314 / ATCC MYA-2876) OX=237561 GN=DAD1 PE=3 SV=1	2	2	0.979502	0.994426	0.374552	1.022	0.955	0.921	0.03	-0.07	-0.12	462.6	431.9	416.6	452.4	5.16	6.21	22.77	7.38	2	High	High	High	High	High	High	High	High	High	High	High	High	497.7	451.1	462.6	469.4	416.4	431.9	281.5	416.6	443	417.7	484.3	452.4	1	348.1
High	Master Protein	A0A1D8PQN1	Rtf1p OS=Candida albicans (strain SC5314 / ATCC MYA-2876) OX=237561 GN=RTF1 PE=4 SV=1	15	36	1	0.775222	0.37536	1.003	0.959	0.954	0	-0.06	-0.07	4134.5	3950.9	3932.3	4121.2	2.16	2.3	5.06	1.42	15	High	High	High	High	High	High	High	High	High	High	High	High	4134.5	4157.7	3994	3938.7	4104.1	3950.9	3723.4	4120.4	3932.3	4028.2	4135	4121.2	1	2891.9
High	Master Protein	A0A1D8PKW5	Chalcone_isomerase domain-containing protein OS=Candida albicans (strain SC5314 / ATCC MYA-2876) OX=237561 GN=orf19.6189 PE=3 SV=1	9	26	0.882474	0.26751	0.376389	1.008	1.056	1.032	0.01	0.08	0.05	4268.5	4468.1	4368.2	4233	2.81	2.09	1.48	3.27	9	High	High	High	High	High	High	High	High	High	High	High	High	4268.5	4446.8	4215.5	4315.8	4482.7	4468.1	4368.2	4351.2	4471.8	4233	4115.6	4392	1	2985.7
High	Master Protein	A0A1D8PND4	Mitochondrial 37S ribosomal protein YMR31 OS=Candida albicans (strain SC5314 / ATCC MYA-2876) OX=237561 GN=orf19.4225.1 PE=4 SV=1	3	113	0.999892	0.999772	0.376485	1.001	1.013	0.938	0	0.02	-0.09	6772.4	6851.9	6347.3	6764.8	2.15	8.15	24.49	5.02	3	High	High	High	High	High	High	High	High	High	High	High	High	7000.8	6726.6	6772.4	7207.1	6131.2	6851.9	4080.8	6347.3	6611.1	6764.8	7137.4	6456.7	1	4896.7
High	Master Protein	Q59SS4	Prohibitin OS=Candida albicans (strain SC5314 / ATCC MYA-2876) OX=237561 GN=PHB1 PE=3 SV=1	15	40	0.874213	0.746869	0.377041	0.958	0.961	0.926	-0.06	-0.06	-0.11	8974	9005.4	8681	9370.7	6.95	6.25	2.81	1.85	15	High	High	High	High	High	High	High	High	High	High	High	High	9737.8	8974	8487.9	9005.4	9508.4	8389.9	8477.5	8965.3	8681	9370.7	9143.5	9483.1	1	6811.2
High	Master Protein Candidate	A0A1D8PJT2	Prohibitin OS=Candida albicans (strain SC5314 / ATCC MYA-2876) OX=237561 GN=orf19.357 PE=3 SV=1	15	40	0.874213	0.746869	0.377041	0.958	0.961	0.926	-0.06	-0.06	-0.11	8974	9005.4	8681	9370.7	6.95	6.25	2.81	1.85	15	High	High	High	High	High	High	High	High	High	High	High	High	9737.8	8974	8487.9	9005.4	9508.4	8389.9	8477.5	8965.3	8681	9370.7	9143.5	9483.1	1	6811.2
Medium	Master Protein	Q5APG6	Pre-mRNA-splicing factor CEF1 OS=Candida albicans (strain SC5314 / ATCC MYA-2876) OX=237561 GN=CEF1 PE=3 SV=2	1	1	0.997362	0.605989	0.377379	0.975	1.061	1.143	-0.04	0.08	0.19	239	260	280.2	245.1	9.1	18.42	7.48	3.33	1	High	High	High	High	High	High	High	High	High	High	High	High	272.9	239	230.2	260	232.5	330.5	280.2	263	305.1	233.7	245.1	249.3	1	190.9
High	Master Protein	Q5AGX1	DNA repair protein OS=Candida albicans (strain SC5314 / ATCC MYA-2876) OX=237561 GN=SMC6 PE=3 SV=1	3	4	0.871899	0.985082	0.378626	1.042	0.992	0.986	0.06	-0.01	-0.02	876	833.9	828.9	840.4	2.38	2.85	10.2	3.85	3	High	High	High	High	High	High	High	High	High	High	High	High	874.3	876	911.7	833.9	822.7	868.7	698.2	845.4	828.9	840.4	833.6	893.8	1	611.5
High	Master Protein	A0A1D8PFN6	Vesicular-fusion protein SEC18 OS=Candida albicans (strain SC5314 / ATCC MYA-2876) OX=237561 GN=SEC18 PE=3 SV=1	23	58	0.862267	0.0278135	0.378825	1.022	1.056	1.032	0.03	0.08	0.05	8932	9231.8	9024.2	8741.9	1.22	2.56	1.57	1.73	22	High	High	High	High	High	High	High	High	High	High	High	High	8932	8793	9007.3	9102.1	9231.8	9564.1	9024.2	8900.5	9183	8741.9	8700.6	8982	1	6247.5
High	Master Protein	Q59WI0	Serine/threonine-protein kinase RIO1 OS=Candida albicans (strain SC5314 / ATCC MYA-2876) OX=237561 GN=orf19.2320 PE=3 SV=1	6	11	0.99258	0.391648	0.37922	1.018	0.944	0.971	0.03	-0.08	-0.04	2090.8	1938.5	1996	2054.6	1.81	4.74	3.72	1.55	6	High	High	High	High	High	High	High	High	High	High	High	High	2090.8	2122.4	2047.2	1920.5	2091.7	1938.5	1996	2047	1901.8	2108.9	2052.4	2054.6	1	1462.4
Medium	Master Protein	A0A1D8PE20	VASt domain-containing protein OS=Candida albicans (strain SC5314 / ATCC MYA-2876) OX=237561 GN=orf19.4423 PE=3 SV=1	1	1	0.660246	0.986908	0.379793	1.056	0.985	0.891	0.08	-0.02	-0.17	118.9	110.8	100.3	112.6	5.66	11.34	16.69	9.42	1	High	High	High	High	High	High	High	High	High	High	High	High	130.6	118.9	118.3	115.4	110.8	92.6	104.4	100.3	75.6	98.1	112.6	118.1	1	91.4
High	Master Protein	Q5A943	Protein-arginine omega-N methyltransferase OS=Candida albicans (strain SC5314 / ATCC MYA-2876) OX=237561 GN=HMT1 PE=4 SV=1	22	96	0.993547	0.992842	0.380472	0.99	0.991	1.025	-0.01	-0.01	0.04	14390.6	14402.3	14897.1	14537.6	0.79	3.12	3.83	1.56	22	High	High	High	High	High	High	High	High	High	High	High	High	14390.6	14552.5	14332.6	14260.9	14402.3	15110.8	14897.1	14560.7	15685	14537.6	14264.5	14713.8	1	10065.6
High	Master Protein	Q59SU6	TAFII28 domain-containing protein OS=Candida albicans (strain SC5314 / ATCC MYA-2876) OX=237561 GN=orf19.6923 PE=3 SV=1	2	2	0.994607	0.956152	0.380759	1.038	0.911	0.885	0.05	-0.13	-0.18	83.2	73.1	71	80.2	8.14	9.79	9.07	4.15	2	High	High	High	High	High	High	High	High	High	High	High	High	83.2	83.9	72.3	73.1	70.5	84.5	71	76.1	63.5	74.6	80.2	80.4	1	58.2
High	Master Protein	Q5A1N7	OTU domain-containing protein OS=Candida albicans (strain SC5314 / ATCC MYA-2876) OX=237561 GN=orf19.1959 PE=4 SV=1	7	14	0.83558	0.636563	0.380783	0.985	0.988	0.957	-0.02	-0.02	-0.06	1832.6	1837.5	1779.8	1860.7	3.1	5.79	1.45	1.71	7	High	High	High	High	High	High	High	High	High	High	High	High	1832.6	1857.1	1749.9	1676.9	1871.4	1837.5	1779.8	1786	1738.9	1860.7	1823.5	1886.5	1	1281.8
High	Master Protein	Q5AGY4	Uncharacterized protein OS=Candida albicans (strain SC5314 / ATCC MYA-2876) OX=237561 GN=orf19.6554 PE=4 SV=1	4	5	0.568873	0.999993	0.38096	1.309	0.914	0.724	0.39	-0.13	-0.47	428.5	299.1	237	327.4	23.29	24.96	13.59	16.77	4	High	High	High	High	High	High	High	High	High	High	High	High	324.1	521.8	428.5	289.5	299.1	442.8	235.3	237	296.4	327.4	288.7	400.6	1	226.7
Medium	Master Protein	Q5A0N4	Uncharacterized protein OS=Candida albicans (strain SC5314 / ATCC MYA-2876) OX=237561 GN=orf19.5777 PE=4 SV=1	1	1	0.99612	0.999798	0.381176	1.016	1.08	1.126	0.02	0.11	0.17	425.6	452.4	471.6	418.9	2.26	13.66	6.1	3.09	1	High	High	High	High	High	High	High	High	High	High	High	High	425.6	434.8	415.5	462.7	452.4	357.6	471.6	496.6	439.4	406.6	418.9	432.6	1	297.7
High	Master Protein	A0A1D8PLB5	Erg251p OS=Candida albicans (strain SC5314 / ATCC MYA-2876) OX=237561 GN=ERG251 PE=4 SV=1	4	7	0.594178	0.287602	0.382987	1.107	1.185	1.115	0.15	0.25	0.16	1619.1	1733	1631	1462.3	1.49	7.62	7.83	7.58	4	High	High	High	High	High	High	High	High	High	High	High	High	1603.4	1619.1	1650.9	1783.8	1540.3	1733	1808.2	1554.2	1631	1462.3	1440	1649.3	1	1121.5
High	Master Protein	Q5AHJ5	Transcription factor TBF1 OS=Candida albicans (strain SC5314 / ATCC MYA-2876) OX=237561 GN=TBF1 PE=1 SV=2	6	12	0.0938242	0.216268	0.385356	0.933	0.956	0.959	-0.1	-0.06	-0.06	857.3	878.6	881.7	919	1.24	4.74	4.15	3.28	6	High	High	High	High	High	High	High	High	High	High	High	High	875.6	857.3	856.9	878.6	921.3	838	859.6	931.8	881.7	917.9	971.7	919	1	612.4
High	Master Protein	Q59MN0	Vacuolar protein 8 OS=Candida albicans (strain SC5314 / ATCC MYA-2876) OX=237561 GN=VAC8 PE=3 SV=3	16	44	0.999733	0.600751	0.385567	1	0.997	1.052	0	0	0.07	7340.8	7318.3	7725.7	7342.9	0.28	5.59	2.56	1.05	16	High	High	High	High	High	High	High	High	High	High	High	High	7344.8	7340.8	7307.6	7318.3	7317.1	8050.3	7725.7	7411.5	7770.6	7228.6	7373.7	7342.9	1	5137.4
High	Master Protein	Q59MV9	Flavohemoprotein OS=Candida albicans (strain SC5314 / ATCC MYA-2876) OX=237561 GN=YHB1 PE=2 SV=1	23	147	0.332154	0.526021	0.385984	0.907	0.938	0.897	-0.14	-0.09	-0.16	30449.9	31519.6	30128.1	33590.3	1.58	4.01	9.7	3.78	23	High	High	High	High	High	High	High	High	High	High	High	High	30761.9	30449.9	29821.8	31519.6	31761	29503.6	33791	30128.1	27913.4	33832.6	33590.3	31562.2	1	21516.6
High	Master Protein	A0A1D8PR39	Ahp2p OS=Candida albicans (strain SC5314 / ATCC MYA-2876) OX=237561 GN=AHP2 PE=3 SV=1	8	21	0.930884	0.528704	0.387151	1.021	0.968	0.967	0.03	-0.05	-0.05	7199.7	6828.6	6820.9	7054.2	2.04	3.29	1.21	8.29	8	High	High	High	High	High	High	High	High	High	High	High	High	6978.1	7252.7	7199.7	6776.3	6828.6	7194.4	6801.5	6820.9	6953.5	7054.2	8011.7	6887.7	1	4880.9
High	Master Protein	A0A1D8PSC8	Arc1p OS=Candida albicans (strain SC5314 / ATCC MYA-2876) OX=237561 GN=ARC1 PE=4 SV=1	24	135	0.378068	0.0374661	0.387921	0.984	0.973	0.991	-0.02	-0.04	-0.01	32166.9	31822.6	32425.5	32704.6	0.12	1.13	1.31	1.76	24	High	High	High	High	High	High	High	High	High	High	High	High	32142.5	32217.5	32166.9	31849.2	31822.6	31214.7	32425.5	32431.8	31696.5	32704.6	33335.8	32183.4	1	22482.3
High	None	Q59W60	Uncharacterized protein OS=Candida albicans (strain SC5314 / ATCC MYA-2876) OX=237561 GN=orf19.664 PE=4 SV=1	1	12	0.619942	0.957022	0.388231	0.967	1.034	1.081	-0.05	0.05	0.11	4412.2	4716.4	4931.4	4563.3	2.5	9.44	2.56	2.43	1	High	High	High	High	High	High	High	High	High	High	High	High	4267.4	4482.7	4412.2	4299.7	4716.4	5193.8	4862.9	4931.4	5109.3	4754.2	4563.3	4556.3	1	2984.9
High	Master Protein	A0A1D8PMA4	Uncharacterized protein OS=Candida albicans (strain SC5314 / ATCC MYA-2876) OX=237561 GN=orf19.1789 PE=4 SV=1	4	13	0.375244	0.991126	0.389534	1.064	1.017	1.049	0.09	0.02	0.07	904.1	864.1	891.1	849.8	3.26	1.76	4	2.77	3	High	High	High	High	High	High	High	High	High	High	High	High	905.6	904.1	854.8	866.6	864.1	839.3	921.2	850.5	891.1	849.8	827.5	874.6	1	633.4
High	Master Protein	A0A1D8PD33	Dao1p OS=Candida albicans (strain SC5314 / ATCC MYA-2876) OX=237561 GN=DAO1 PE=3 SV=1	1	2	0.0140982	0.352054	0.389883	1.141	1.052	1.054	0.19	0.07	0.08	205.7	189.7	190	180.3	2.49	4.67	5.52	3.55	1	High	High	High	High	High	High	High	High	High	High	High	High	202.2	205.7	212.3	189.7	182.4	200.1	200.9	179.9	190	180.3	185.3	172.7	1	141.4
High	Master Protein	Q5A0V9	Histone-glutamine methyltransferase OS=Candida albicans (strain SC5314 / ATCC MYA-2876) OX=237561 GN=NOP1 PE=3 SV=1	23	176	0.630043	0.878838	0.39091	0.957	0.992	1.049	-0.06	-0.01	0.07	32562.8	33757.3	35670.6	34018.9	1.21	5.38	2.64	1.42	23	High	High	High	High	High	High	High	High	High	High	High	High	32399.8	33152.4	32562.8	33757.3	34549.1	31142.7	35670.6	35933.5	34204	34053.2	34018.9	33206.1	1	22662.3
High	Master Protein	A0A1D8PTN4	H/ACA ribonucleoprotein complex subunit NOP10 OS=Candida albicans (strain SC5314 / ATCC MYA-2876) OX=237561 GN=NOP10 PE=3 SV=1	8	24	0.953893	0.66406	0.391387	1.042	0.981	0.963	0.06	-0.03	-0.05	6062.8	5709.1	5601.3	5818.3	0.9	8.53	5.29	3.94	8	High	High	High	High	High	High	High	High	High	High	High	High	6062.8	6022.5	6130.3	6098.1	5709.1	5139.9	5186.2	5748	5601.3	5787.6	6207.7	5818.3	1	4240.7
High	Master Protein	A0A1D8PQU2	DNL-type domain-containing protein OS=Candida albicans (strain SC5314 / ATCC MYA-2876) OX=237561 GN=orf19.6917 PE=4 SV=1	1	5	0.999754	0.681275	0.391521	1.008	1.099	0.965	0.01	0.14	-0.05	335.2	365.5	320.9	332.6	8.29	9.33	9.05	6.36	1	High	High	High	High	High	High	High	High	High	High	High	High	370.8	315.1	335.2	338.1	365.5	406.7	273.5	320.9	321.8	326.6	332.6	366.9	1	259.4
Low	Master Protein	A0A1D8PGI1	Uncharacterized protein OS=Candida albicans (strain SC5314 / ATCC MYA-2876) OX=237561 GN=orf19.1500 PE=4 SV=1	1	1	0.914242	0.69062	0.391962	1	1.052	1.066	0	0.07	0.09	382.4	402.2	407.8	382.4	3	6.1	5.6	6.33	1	High	High	High	High	High	High	High	High	High	High	High	High	379.3	400.7	382.4	416.6	402.2	369.5	407.8	428	382.5	397.5	350.7	382.4	1	265.3
High	Master Protein	A0A1D8PS68	rRNA-binding ribosome biosynthesis protein OS=Candida albicans (strain SC5314 / ATCC MYA-2876) OX=237561 GN=CAALFM_CR02420WA PE=4 SV=1	4	6	0.941437	0.270582	0.39206	1.005	0.965	0.983	0.01	-0.05	-0.02	462	443.6	451.7	459.5	3.62	2.77	5.17	1.98	4	High	High	High	High	High	High	High	High	High	High	High	High	491.2	462	461.3	443.6	445.2	423.4	457.7	451.7	415.5	457.3	474.2	459.5	1	343.6
Low	Master Protein	A0A1D8PDX4	Protein ZIP4 homolog OS=Candida albicans (strain SC5314 / ATCC MYA-2876) OX=237561 GN=SPO22 PE=4 SV=1	1	1	0.142196	0.999442	0.392105	1.249	1.016	0.887	0.32	0.02	-0.17	270.9	220.3	192.4	216.9	8.81	2.15	1.4	16.11	1	High	High	High	High	High	High	High	High	High	High	High	High	239.8	285.6	270.9	221	220.3	212.6	191.6	192.4	196.7	216.9	188.6	259.5	1	167.7
High	Master Protein	Q5AF54	Mitochondrial import inner membrane translocase subunit TIM13 OS=Candida albicans (strain SC5314 / ATCC MYA-2876) OX=237561 GN=TIM13 PE=3 SV=2	4	32	0.924328	0.436511	0.393781	1.024	0.924	0.963	0.03	-0.11	-0.05	4590.7	4141.8	4316.8	4481.6	0.4	7.06	7.94	0.62	4	High	High	High	High	High	High	High	High	High	High	High	High	4607.6	4590.7	4571.1	4481.7	4141.8	3895.2	3778.9	4380	4316.8	4435.6	4484.6	4481.6	1	3222.8
High	Master Protein	Q5ANP3	Endoplasmic reticulum junction formation protein lunapark OS=Candida albicans (strain SC5314 / ATCC MYA-2876) OX=237561 GN=orf19.5857 PE=3 SV=1	2	8	0.997401	0.501111	0.393874	1.005	0.968	0.941	0.01	-0.05	-0.09	479.1	461.4	448.2	476.5	6.1	9.91	10.62	8.17	1	High	High	High	High	High	High	High	High	High	High	High	High	458.8	479.1	517	461.4	474.1	392.6	474.9	448.2	384.7	462.2	537.9	476.5	1	320.9
High	Master Protein	A0A1D8PH21	60S ribosomal protein L36 OS=Candida albicans (strain SC5314 / ATCC MYA-2876) OX=237561 GN=RPL39 PE=3 SV=1	7	113	0.395219	0.847344	0.394139	0.959	1.083	1.082	-0.06	0.11	0.11	17102.6	19307	19290.1	17832.7	0.2	6.33	2.7	6.23	5	High	High	High	High	High	High	High	High	High	High	High	High	17121.5	17102.6	17054.6	17452	19307	19674.7	18967.6	19290.1	19993.4	19521.4	17360.1	17832.7	1	11975.7
High	Master Protein	A0A1D8PS74	Uncharacterized protein OS=Candida albicans (strain SC5314 / ATCC MYA-2876) OX=237561 GN=CAALFM_CR02380CA PE=3 SV=1	2	5	0.848607	0.316402	0.394351	1.033	1.103	1.053	0.05	0.14	0.07	450.6	481.6	459.6	436.4	1.22	6.52	3.11	6.73	2	High	High	High	High	High	High	High	High	High	High	High	High	446.5	457.4	450.6	437.5	481.6	496.7	459.4	484.7	459.6	436.4	408.6	467.4	1	312.3
High	Master Protein	Q59TD1	Rim2p OS=Candida albicans (strain SC5314 / ATCC MYA-2876) OX=237561 GN=RIM2 PE=3 SV=1	7	14	0.998849	0.50864	0.394488	0.993	1.04	1.048	-0.01	0.06	0.07	2374.4	2486.1	2505.7	2390.7	1.17	2.92	3.58	4.2	7	High	High	High	High	High	High	High	High	High	High	High	High	2404.5	2349.1	2374.4	2377.4	2512.7	2486.1	2373.9	2505.7	2542.1	2390.7	2259.7	2454.8	1	1681.9
High	Master Protein	A0A1D8PPS1	Ribosomal 60S subunit protein L25 OS=Candida albicans (strain SC5314 / ATCC MYA-2876) OX=237561 GN=RPL25 PE=3 SV=1	13	184	0.984961	0.457554	0.395076	0.974	1.045	1.069	-0.04	0.06	0.1	33482.1	35941.1	36756.5	34389	1.83	10.07	6.85	1.28	13	High	High	High	High	High	High	High	High	High	High	High	High	33482.1	33346.8	34478	34266.5	35941.1	41427.1	36756.5	35200.1	40202.7	33890.9	34389	34770.1	1	23419.2
High	Master Protein	A0A1D8PRF3	Uncharacterized protein OS=Candida albicans (strain SC5314 / ATCC MYA-2876) OX=237561 GN=orf19.7199 PE=4 SV=1	6	12	0.393659	0.999647	0.395207	0.916	1.014	1.023	-0.13	0.02	0.03	3901.9	4318.7	4357.1	4259.5	4.93	3.83	4.59	3.14	6	High	High	High	High	High	High	High	High	High	High	High	High	4211.1	3846.5	3901.9	4318.7	4333.9	4045.8	4703.2	4357.1	4339.5	4325	4070.1	4259.5	1	2945.5
High	Master Protein	A0A1D8PHR5	Pst1p OS=Candida albicans (strain SC5314 / ATCC MYA-2876) OX=237561 GN=PST1 PE=3 SV=1	6	23	0.836608	0.929299	0.395488	1.069	1.08	1.137	0.1	0.11	0.19	4936.1	4986.1	5250.4	4617.5	2.02	5.37	6.76	8.45	6	High	High	High	High	High	High	High	High	High	High	High	High	4879.9	5075	4936.1	5127.1	4986.1	4616.6	4803.5	5493.7	5250.4	5229.2	4617.5	4468.7	1	3413.3
High	Master Protein	Q59WT0	Actin-related protein 2/3 complex subunit 3 OS=Candida albicans (strain SC5314 / ATCC MYA-2876) OX=237561 GN=ARC18 PE=3 SV=1	5	12	0.944675	0.259118	0.395635	1.02	0.942	0.959	0.03	-0.09	-0.06	1835	1693.1	1724.3	1798.2	0.83	6.14	2.29	4.71	4	High	High	High	High	High	High	High	High	High	High	High	High	1820.4	1850.9	1835	1789	1693.1	1581.8	1724.3	1731.2	1660.5	1721.7	1891.2	1798.2	1	1273.3
High	Master Protein	A0A1D8PM92	Nucleocytoplasmic transporter OS=Candida albicans (strain SC5314 / ATCC MYA-2876) OX=237561 GN=orf19.748 PE=3 SV=1	4	6	0.565741	0.948627	0.396608	1.006	1.004	1.008	0.01	0.01	0.01	1249.2	1247.2	1251.6	1242.2	2.03	1.78	3.11	3.88	4	High	High	High	High	High	High	High	High	High	High	High	High	1249.2	1292.9	1247.7	1215	1257.4	1247.2	1251.6	1318.9	1249.1	1171.5	1242.2	1261.8	1	873.8
High	Master Protein	A0A1D8PSF5	Kti12p OS=Candida albicans (strain SC5314 / ATCC MYA-2876) OX=237561 GN=KTI12 PE=3 SV=1	5	6	0.924061	0.594322	0.397132	1.035	0.954	0.989	0.05	-0.07	-0.02	1314.7	1212.2	1256.9	1270.5	2.79	3.96	7.7	5.83	5	High	High	High	High	High	High	High	High	High	High	High	High	1314.7	1377.5	1311.5	1187	1212.2	1280.8	1100.6	1266.2	1256.9	1242.9	1385.7	1270.5	1	919.6
High	Master Protein	Q59R29	Uncharacterized protein OS=Candida albicans (strain SC5314 / ATCC MYA-2876) OX=237561 GN=orf19.6691 PE=3 SV=1	1	3	0.570229	0.821359	0.398086	0.938	1.033	1.064	-0.09	0.05	0.09	291.5	321.1	330.6	310.8	1.35	7.89	4.66	2	1	High	High	High	High	High	High	High	High	High	High	High	High	297.9	290.8	291.5	294.5	345	321.1	344.9	314.1	330.6	310.8	302.1	314.1	1	208.4
High	Master Protein	A0A1D8PCV2	4F5 domain-containing protein OS=Candida albicans (strain SC5314 / ATCC MYA-2876) OX=237561 GN=orf19.2965.1 PE=4 SV=1	1	2	0.706456	0.999767	0.399183	1.068	1.039	0.948	0.1	0.06	-0.08	516	501.7	457.9	482.9	2.98	6.02	4.83	3.54	1	High	High	High	High	High	High	High	High	High	High	High	High	516.6	516	490.1	452.7	501.7	505	481	457.9	436.7	506.7	473.1	482.9	1	361.3
Medium	Master Protein	A0A1D8PFP2	Rob1p OS=Candida albicans (strain SC5314 / ATCC MYA-2876) OX=237561 GN=ROB1 PE=4 SV=1	1	1	0.997162	0.587105	0.399285	1.029	0.95	0.895	0.04	-0.07	-0.16	280.9	259.3	244.3	273	4.1	3.02	13	2.74	1	High	High	High	High	High	High	High	High	High	High	High	High	280.9	289.9	267.1	262.1	259.3	247.5	288.4	244.3	224.3	284.7	273	270.6	1	196.5
High	Master Protein	A0A1D8PMW6	Actin-depolymerizing factor 1 OS=Candida albicans (strain SC5314 / ATCC MYA-2876) OX=237561 GN=COF1 PE=3 SV=1	11	153	0.920156	0.102879	0.401903	0.951	1.133	1.091	-0.07	0.18	0.13	18296.4	21810.9	21001.4	19248.3	5.2	10.55	9.32	1.04	11	High	High	High	High	High	High	High	High	High	High	High	High	19757.7	17923.3	18296.4	21141.3	21810.9	25611.1	19729.2	21001.4	23648.5	19244	19248.3	19596	1	13819.7
High	Master Protein	A0A1D8PQK6	Calcium-transporting ATPase OS=Candida albicans (strain SC5314 / ATCC MYA-2876) OX=237561 GN=PMR1 PE=3 SV=1	9	23	0.033169	0.319446	0.401948	1.132	0.962	0.959	0.18	-0.06	-0.06	3416.6	2903.3	2894.1	3018.5	4.17	0.94	3.11	4.18	9	High	High	High	High	High	High	High	High	High	High	High	High	3216.3	3487.3	3416.6	2888	2941.4	2903.3	2894.1	3030.1	2857.1	2965.4	3018.5	3209.2	1	2249.6
High	Master Protein	Q5A934	Zinc finger-containing protein OS=Candida albicans (strain SC5314 / ATCC MYA-2876) OX=237561 GN=ZPR1 PE=3 SV=1	24	120	0.753119	0.953298	0.402492	1.015	0.982	0.977	0.02	-0.03	-0.03	19026.7	18397.8	18306.1	18742.3	0.05	0.2	5.19	1.64	24	High	High	High	High	High	High	High	High	High	High	High	High	19033.7	19013.3	19026.7	18397.8	18416.6	18344.4	16877.1	18306.1	18623.2	18252.3	18811.9	18742.3	1	13313.2
High	Master Protein	Q59PA1	Fre10p OS=Candida albicans (strain SC5314 / ATCC MYA-2876) OX=237561 GN=FRE10 PE=4 SV=1	10	24	0.959796	0.883393	0.403323	0.984	0.976	0.967	-0.02	-0.03	-0.05	5294.8	5255.7	5205.6	5383	3.48	6.74	9.52	5.54	10	High	High	High	High	High	High	High	High	High	High	High	High	5292.9	5619.9	5294.8	5255.7	5025.7	5731.3	4546.7	5205.6	5489.7	5383	5907.4	5366.6	1	3702.2
Medium	Master Protein	A0A1D8PII5	Protein disulfide isomerase OS=Candida albicans (strain SC5314 / ATCC MYA-2876) OX=237561 GN=orf19.1392 PE=4 SV=1	1	1	0.765382	0.945496	0.403339	0.983	1.063	1.158	-0.02	0.09	0.21	380	411	447.4	386.6	4.89	5.34	7.7	7.43	1	High	High	High	High	High	High	High	High	High	High	High	High	380	356.6	392.9	411	428.5	385.1	447.4	457.6	395.4	430.3	386.6	374	1	265.8
High	Master Protein	Q5AEN2	Ribosomal 60S subunit protein L9B OS=Candida albicans (strain SC5314 / ATCC MYA-2876) OX=237561 GN=RPL9B PE=3 SV=1	20	274	0.999792	0.530298	0.405234	1.002	1.031	1.03	0	0.04	0.04	51299.4	52788.7	52733.5	51197.2	0.54	4.71	1.78	0.79	20	High	High	High	High	High	High	High	High	High	High	High	High	51299.4	50889.6	51421.3	50404.8	52788.7	55378.9	52733.5	52386.5	54172.1	50938.9	51197.2	51736.5	1	35881.7
High	Master Protein	A0A1D8PNP8	SAP30_Sin3_bdg domain-containing protein OS=Candida albicans (strain SC5314 / ATCC MYA-2876) OX=237561 GN=orf19.6667 PE=3 SV=1	1	1	0.999999	0.848508	0.405787	0.997	1.036	1.057	0	0.05	0.08	184.6	191.8	195.8	185.1	4.17	5.07	10.83	5.23	1	High	High	High	High	High	High	High	High	High	High	High	High	192.9	177.5	184.6	184.9	191.8	204.3	186.3	195.8	228.3	195	185.1	175.6	1	135
High	Master Protein	Q5APE1	Uncharacterized protein OS=Candida albicans (strain SC5314 / ATCC MYA-2876) OX=237561 GN=orf19.4824 PE=4 SV=1	1	1	0.994325	0.999965	0.405875	1	1.05	0.95	0	0.07	-0.07	113.7	119.4	108.1	113.7	2.25	5.94	9.04	5.92	1	High	High	High	High	High	High	High	High	High	High	High	High	116.9	111.9	113.7	107.6	119.4	119.5	96.1	115.2	108.1	113.7	110.1	123.4	1	81.8
High	Master Protein	A0A1D8PHN5	Rta3p OS=Candida albicans (strain SC5314 / ATCC MYA-2876) OX=237561 GN=RTA3 PE=3 SV=1	1	2	0.474227	0.9637	0.406212	1.106	1.011	0.958	0.15	0.02	-0.06	173.4	158.5	150.2	156.7	6.41	7.87	8.41	7.57	1	High	High	High	High	High	High	High	High	High	High	High	High	189.6	173.4	167.7	158.5	158.4	181.1	150.2	155	131.8	156.7	151.9	175	1	132.6
High	Master Protein	Q59T93	RRM domain-containing protein OS=Candida albicans (strain SC5314 / ATCC MYA-2876) OX=237561 GN=orf19.4538 PE=4 SV=1	1	2	0.968693	0.995225	0.407334	1.013	0.997	0.888	0.02	0	-0.17	50.1	49.4	44	49.5	1.72	4.5	8.75	5.03	1	High	High	High	High	High	High	High	High	High	High	High	High	48.7	50.2	50.1	46.9	51.4	49.4	44	49.7	42.1	46	49.5	50.7	1	34.1
Low	Master Protein	A0A1D8PFW6	Deoxycytidine monophosphate deaminase OS=Candida albicans (strain SC5314 / ATCC MYA-2876) OX=237561 GN=orf19.7243 PE=3 SV=1	1	1	0.396365	0.882553	0.409277	1.077	0.979	0.938	0.11	-0.03	-0.09	353.2	321	307.7	327.9	8.91	5.4	4.2	6.8	1	High	High	High	High	High	High	High	High	High	High	High	High	349.1	408.1	353.2	310.8	321	345.1	307.7	298.6	324.3	327.9	322.8	365	1	244.2
High	Master Protein	A0A1D8PR52	GPN-loop GTPase OS=Candida albicans (strain SC5314 / ATCC MYA-2876) OX=237561 GN=orf19.6463 PE=3 SV=1	8	20	0.999012	0.535968	0.409409	1.006	0.946	0.964	0.01	-0.08	-0.05	5019	4718.7	4807.9	4989.2	1.34	2.36	9.29	3.26	7	High	High	High	High	High	High	High	High	High	High	High	High	4968.4	5101.5	5019	4822.3	4718.7	4600	4192.2	5031.4	4807.9	4845.8	5171.2	4989.2	1	3475.2
High	Master Protein	A0A1D8PSJ4	Mitochondrial escape protein 2 OS=Candida albicans (strain SC5314 / ATCC MYA-2876) OX=237561 GN=CAALFM_CR03620CA PE=3 SV=1	3	11	0.746116	0.45895	0.410234	1.004	1.049	1.046	0.01	0.07	0.07	541.2	565.4	564	538.9	2.64	4.75	4.55	3.91	2	High	High	High	High	High	High	High	High	High	High	High	High	541.2	536.8	563.8	565.4	527.7	578.7	564	531.6	581.7	543.3	505.5	538.9	1	378.6
High	Master Protein Candidate	Q5A061	Mitochondrial escape protein 2 OS=Candida albicans (strain SC5314 / ATCC MYA-2876) OX=237561 GN=PRP13 PE=3 SV=2	3	11	0.746116	0.45895	0.410234	1.004	1.049	1.046	0.01	0.07	0.07	541.2	565.4	564	538.9	2.64	4.75	4.55	3.91	2	High	High	High	High	High	High	High	High	High	High	High	High	541.2	536.8	563.8	565.4	527.7	578.7	564	531.6	581.7	543.3	505.5	538.9	1	378.6
High	Master Protein	Q5A4M2	Malate dehydrogenase (Oxaloacetate-decarboxylating) OS=Candida albicans (strain SC5314 / ATCC MYA-2876) OX=237561 GN=MAE1 PE=3 SV=1	16	37	0.297197	0.825609	0.410646	1.052	1.019	0.965	0.07	0.03	-0.05	5943.7	5760.7	5451.5	5650.8	2.64	1.66	1.48	3.47	16	High	High	High	High	High	High	High	High	High	High	High	High	5722.4	5943.7	6022	5684.1	5760.7	5874.4	5451.5	5438.8	5586	5650.8	5494.1	5885.3	1	4002.6
High	Master Protein	Q59U54	GCR1_C domain-containing protein OS=Candida albicans (strain SC5314 / ATCC MYA-2876) OX=237561 GN=orf19.1897 PE=4 SV=1	4	6	0.996949	0.58486	0.410866	0.981	1.019	1.086	-0.03	0.03	0.12	715.6	743.2	792.3	729.4	0.42	8.31	4.96	4.54	4	High	High	High	High	High	High	High	High	High	High	High	High	719.6	713.7	715.6	717.6	743.2	838.5	792.3	732.6	804.7	687.5	729.4	752.3	1	503.4
High	Master Protein	A0A1D8PJ43	GTPase OS=Candida albicans (strain SC5314 / ATCC MYA-2876) OX=237561 GN=BMS1 PE=4 SV=1	26	55	0.804208	0.541338	0.411137	1.032	0.994	0.956	0.05	-0.01	-0.06	6514.8	6279.3	6036.3	6314.3	1.68	5.74	3.14	2.77	26	High	High	High	High	High	High	High	High	High	High	High	High	6514.8	6632.2	6412.8	6308.5	6279.3	5688.3	6036.3	6232.6	5853	6188.4	6314.3	6535.4	1	4556.8
High	Master Protein	A0A1D8PEH4	Uncharacterized protein OS=Candida albicans (strain SC5314 / ATCC MYA-2876) OX=237561 GN=orf19.4758 PE=3 SV=1	6	48	0.98914	0.649646	0.41287	1.003	0.983	0.965	0	-0.03	-0.05	7530	7377.4	7241.7	7507.4	2.72	0.88	3.49	2.38	6	High	High	High	High	High	High	High	High	High	High	High	High	7504.6	7877	7530	7377.4	7476.7	7354.5	7143.5	7627.6	7241.7	7462.3	7507.4	7795.5	1	5249.1
Medium	None	A0A1D8PK89	General amino-acid permease GAP2 OS=Candida albicans (strain SC5314 / ATCC MYA-2876) OX=237561 GN=GAP2 PE=2 SV=1	1	2	0.519912	0.925709	0.413308	1.072	0.966	0.897	0.1	-0.05	-0.16	177.1	159.7	148.2	165.3	4.38	2.94	10.25	0.91	1	High	High	High	High	High	High	High	High	High	High	High	High	177.1	185.5	170	158	166.9	159.7	148.2	172.5	142.8	165.3	167.9	165.2	1	123.9
High	Master Protein	Q5AP83	Transcription initiation factor IIE subunit beta OS=Candida albicans (strain SC5314 / ATCC MYA-2876) OX=237561 GN=orf19.4882 PE=3 SV=1	5	8	0.160531	0.288321	0.413844	1.051	0.963	0.98	0.07	-0.05	-0.03	1663.6	1524.1	1551.3	1582.6	2.91	1.55	0.99	3.1	5	High	High	High	High	High	High	High	High	High	High	High	High	1663.6	1715.6	1618.7	1524.1	1563.2	1520.1	1551.3	1555	1526.8	1549.9	1582.6	1646.9	1	1163.6
High	Master Protein	A0A1D8PHX3	Serine/threonine-protein kinase TOR OS=Candida albicans (strain SC5314 / ATCC MYA-2876) OX=237561 GN=TOR1 PE=3 SV=1	3	4	0.997005	0.81338	0.415028	0.982	1.002	1.016	-0.03	0	0.02	550.9	561.7	569.5	560.8	1.11	5.13	6.35	2.24	3	High	High	High	High	High	High	High	High	High	High	High	High	555.5	543.5	550.9	548	561.7	604.2	569.5	560.7	629.2	561.2	539.4	560.8	1	388.6
High	Master Protein	A0A1D8PR41	ER membrane protein complex subunit 3 OS=Candida albicans (strain SC5314 / ATCC MYA-2876) OX=237561 GN=orf19.6462 PE=3 SV=1	4	10	0.996399	0.311216	0.415426	1.002	1.102	1.044	0	0.14	0.06	936.9	1030	975.7	934.8	2.79	0.49	8.56	4.39	4	High	High	High	High	High	High	High	High	High	High	High	High	936.9	928.6	978	1025.4	1035.4	1030	1123.8	975.7	968.8	929.4	934.8	1004.7	1	655.3
High	Master Protein	Q5A7S3	Uncharacterized protein OS=Candida albicans (strain SC5314 / ATCC MYA-2876) OX=237561 GN=orf19.5393 PE=3 SV=1	12	30	0.254803	0.122133	0.415807	1.038	1.046	1.03	0.05	0.06	0.04	3319.7	3344.5	3295	3197.9	1.84	1.33	1.02	2.23	12	High	High	High	High	High	High	High	High	High	High	High	High	3319.7	3361.8	3241.7	3369	3282.7	3344.5	3253.7	3320	3295	3158	3197.9	3297.2	1	2322
Medium	Master Protein	A0A1D8PNZ7	Glycerophosphocholine phosphodiesterase GDE1 OS=Candida albicans (strain SC5314 / ATCC MYA-2876) OX=237561 GN=GDE1 PE=1 SV=1	1	1	0.330417	0.999999	0.41607	0.898	1.008	0.884	-0.15	0.01	-0.18	34.6	38.9	34.1	38.6	6.81	13.37	5.34	9.05	1	High	High	High	High	High	High	High	High	High	High	High	High	31.5	36	34.6	38.9	34	44.5	32.9	34.1	36.5	35.8	38.6	42.8	1	22
High	Master Protein	Q5AAR0	Transcription factor IWS1 OS=Candida albicans (strain SC5314 / ATCC MYA-2876) OX=237561 GN=IWS1 PE=3 SV=2	11	33	0.87157	0.821015	0.416074	0.993	0.983	0.979	-0.01	-0.02	-0.03	5775.9	5720.5	5695	5818	0.85	2.11	2.11	1.2	11	High	High	High	High	High	High	High	High	High	High	High	High	5820.2	5775.9	5721.8	5720.5	5902	5671.4	5590.5	5831.1	5695	5770.7	5908.1	5818	1	4071
High	Master Protein	P83783	Adenosylhomocysteinase OS=Candida albicans (strain SC5314 / ATCC MYA-2876) OX=237561 GN=SAH1 PE=1 SV=2	36	463	0.835552	0.0864408	0.416093	1.012	0.973	0.981	0.02	-0.04	-0.03	89449.8	85980.2	86730.1	88373.3	1.14	0.71	1.65	0.65	36	High	High	High	High	High	High	High	High	High	High	High	High	87746.3	89449.8	89557.4	85980.2	85427	86641.3	88483.9	85646.2	86730.1	88373.3	88741.7	87610.6	1	61374.7
High	Master Protein	Q59QN2	Uncharacterized protein OS=Candida albicans (strain SC5314 / ATCC MYA-2876) OX=237561 GN=SAP155 PE=3 SV=1	1	4	0.596531	0.942973	0.41692	1.225	0.878	0.744	0.29	-0.19	-0.43	1562.9	1121	949.8	1276.1	19.86	15.54	18.27	15.46	1	High	High	High	High	High	High	High	High	High	High	High	High	1217.4	1825.4	1562.9	1027.5	1121	1380.2	868	949.8	1221.6	1276.1	1074.1	1467.5	1	851.5
High	Master Protein	A0A1D8PLZ6	TFIIH/NER complex subunit OS=Candida albicans (strain SC5314 / ATCC MYA-2876) OX=237561 GN=orf19.5297 PE=4 SV=1	1	2	0.995063	0.932535	0.416967	0.976	1.082	1.117	-0.03	0.11	0.16	271.7	300.9	310.8	278.3	3.96	8.77	9.99	1.11	1	High	High	High	High	High	High	High	High	High	High	High	High	267.3	288	271.7	260.6	300.9	307.6	275.7	337	310.8	278.3	276.9	282.8	1	187
Medium	None	A0A1D8PHQ5	U4/U6-U5 snRNP complex subunit OS=Candida albicans (strain SC5314 / ATCC MYA-2876) OX=237561 GN=orf19.1296 PE=3 SV=1	1	5	0.390366	0.999968	0.417385	0.658	1.09	1.453	-0.6	0.12	0.54	3091.1	5121.4	6830.6	4700.1	26.35	27.67	16	24.09	1	High	High	High	High	High	High	High	High	High	High	High	High	4116	2435.6	3091.1	5395.7	5121.4	3096.5	6880.5	6830.6	5117.2	4700.1	5542.4	3373.8	1	2879
High	Master Protein Candidate	A0A1D8PC38	Cta2p OS=Candida albicans (strain SC5314 / ATCC MYA-2876) OX=237561 GN=CTA2 PE=4 SV=1	4	19	0.197253	0.0492957	0.418369	1.154	1.214	1.043	0.21	0.28	0.06	1884.2	1982.4	1703.7	1632.8	4.5	9.57	10.79	3.74	1	High	High	High	High	High	High	High	High	High	High	High	High	1959.9	1791.1	1884.2	1982.4	1823.2	2204.7	1700.2	1703.7	2041.2	1696	1573.9	1632.8	1	1370.8
High	Master Protein Candidate	Q59KS8	Tlo9p OS=Candida albicans (strain SC5314 / ATCC MYA-2876) OX=237561 GN=TLO9 PE=4 SV=1	4	19	0.197253	0.0492957	0.418369	1.154	1.214	1.043	0.21	0.28	0.06	1884.2	1982.4	1703.7	1632.8	4.5	9.57	10.79	3.74	1	High	High	High	High	High	High	High	High	High	High	High	High	1959.9	1791.1	1884.2	1982.4	1823.2	2204.7	1700.2	1703.7	2041.2	1696	1573.9	1632.8	1	1370.8
High	Master Protein	A0A1D8PDT5	Tlo34p OS=Candida albicans (strain SC5314 / ATCC MYA-2876) OX=237561 GN=TLO34 PE=4 SV=1	4	19	0.197253	0.0492957	0.418369	1.154	1.214	1.043	0.21	0.28	0.06	1884.2	1982.4	1703.7	1632.8	4.5	9.57	10.79	3.74	1	High	High	High	High	High	High	High	High	High	High	High	High	1959.9	1791.1	1884.2	1982.4	1823.2	2204.7	1700.2	1703.7	2041.2	1696	1573.9	1632.8	1	1370.8
High	Master Protein Candidate	A0A1D8PRM3	Tlo16p OS=Candida albicans (strain SC5314 / ATCC MYA-2876) OX=237561 GN=TLO16 PE=4 SV=1	4	19	0.197253	0.0492957	0.418369	1.154	1.214	1.043	0.21	0.28	0.06	1884.2	1982.4	1703.7	1632.8	4.5	9.57	10.79	3.74	1	High	High	High	High	High	High	High	High	High	High	High	High	1959.9	1791.1	1884.2	1982.4	1823.2	2204.7	1700.2	1703.7	2041.2	1696	1573.9	1632.8	1	1370.8
High	Master Protein	P0CY34	Transcriptional repressor TUP1 OS=Candida albicans (strain SC5314 / ATCC MYA-2876) OX=237561 GN=TUP1 PE=2 SV=1	36	176	0.881384	0.26398	0.41849	0.985	1.043	1.024	-0.02	0.06	0.03	32459.2	34374.6	33749	32957.9	2.36	1.6	2.72	0.4	36	High	High	High	High	High	High	High	High	High	High	High	High	33421.3	31899	32459.2	34376.9	34374.6	33432.8	32999.1	34832.7	33749	33115.5	32957.9	32852.8	1	23376.7
High	Master Protein	Q5A9A9	RNA-binding signal recognition particle subunit OS=Candida albicans (strain SC5314 / ATCC MYA-2876) OX=237561 GN=SEC65 PE=4 SV=1	7	17	0.931077	0.986308	0.419141	1	0.997	1.044	0	0	0.06	3862.9	3852.1	4031.2	3862.9	1.33	5.03	4.35	4.49	7	High	High	High	High	High	High	High	High	High	High	High	High	3950.2	3862.9	3858.4	3913.4	3852.1	3558.2	4203.1	4031.2	3852.8	3862.9	3626.3	3959.4	1	2763
High	Master Protein	Q5ADM9	Dolichyl-phosphate-mannose--protein mannosyltransferase 2 OS=Candida albicans (strain SC5314 / ATCC MYA-2876) OX=237561 GN=PMT2 PE=1 SV=1	18	51	0.85701	0.916395	0.420239	1.019	1.019	1.037	0.03	0.03	0.05	9797.1	9795.3	9965.3	9613.1	1.41	3.96	4.66	2.65	18	High	High	High	High	High	High	High	High	High	High	High	High	9601.9	9797.1	9867.7	9795.3	10060.5	9301.3	10468.5	9965.3	9538.2	9264	9613.1	9756.3	1	6716.1
High	Master Protein	A0A1D8PJR3	Uncharacterized protein OS=Candida albicans (strain SC5314 / ATCC MYA-2876) OX=237561 GN=orf19.332.1 PE=3 SV=1	4	20	0.855906	0.255893	0.421128	1.035	0.921	0.917	0.05	-0.12	-0.12	5117.5	4553.7	4537.6	4945.9	2.45	10.12	3.64	1.36	4	High	High	High	High	High	High	High	High	High	High	High	High	5046.4	5292.1	5117.5	5003.7	4553.7	4083.7	4811.1	4537.6	4505.2	4945.9	4915.8	5044.8	1	3529.8
High	Master Protein	A0A1D8PHA2	Ubiquinol--cytochrome-c reductase subunit 8 OS=Candida albicans (strain SC5314 / ATCC MYA-2876) OX=237561 GN=QCR8 PE=1 SV=1	6	27	0.783873	0.347149	0.421822	1.042	0.957	0.939	0.06	-0.06	-0.09	9252.2	8493.8	8341.3	8879.1	4.93	7.47	2.68	4.78	6	High	High	High	High	High	High	High	High	High	High	High	High	8929.5	9838	9252.2	8825.4	8493.8	7622.5	8341.3	8592.3	8144.8	8590.1	9433.4	8879.1	1	6245.8
High	Master Protein	Q5A925	Uncharacterized protein OS=Candida albicans (strain SC5314 / ATCC MYA-2876) OX=237561 GN=orf19.3309 PE=4 SV=1	3	8	0.986539	0.424001	0.421937	1.023	1.07	1.051	0.03	0.1	0.07	701.1	733	720	685	0.83	2.55	4.65	2.96	3	High	High	High	High	High	High	High	High	High	High	High	High	701.1	693.3	704.6	701.3	733	733.4	691	720	758	685	679.6	717.6	1	490.4
High	Master Protein	Q5AGV3	Uncharacterized protein OS=Candida albicans (strain SC5314 / ATCC MYA-2876) OX=237561 GN=orf19.6585 PE=3 SV=1	5	11	0.303833	0.95115	0.423147	0.888	1.058	1.108	-0.17	0.08	0.15	2277.2	2711	2839.1	2563.5	5.75	7.86	7.36	2.83	5	High	High	High	High	High	High	High	High	High	High	High	High	2443.8	2182.3	2277.2	2711	2747.6	2375.1	2532.2	2917.1	2839.1	2590.8	2563.5	2455.2	1	1709.3
High	Master Protein	Q5A3N5	Mitochondrial 54S ribosomal protein YmL13 OS=Candida albicans (strain SC5314 / ATCC MYA-2876) OX=237561 GN=orf19.5235 PE=3 SV=1	14	73	0.975352	0.7382	0.423962	0.987	1.041	1.06	-0.02	0.06	0.08	15351.2	16181.9	16485.2	15546.3	0.48	2.34	6.67	0.91	13	High	High	High	High	High	High	High	High	High	High	High	High	15351.2	15445.8	15300.3	15605.4	16181.9	16309.5	15172.9	16485.2	17334.8	15546.3	15412.7	15697.1	1	10737.5
High	Master Protein	O13289	Peroxisomal catalase OS=Candida albicans (strain SC5314 / ATCC MYA-2876) OX=237561 GN=CAT1 PE=2 SV=5	24	107	0.885405	0.999814	0.424368	0.989	0.993	1.064	-0.02	-0.01	0.09	18368.8	18436	19751.6	18571.3	1.89	2.72	4.41	2.52	24	High	High	High	High	High	High	High	High	High	High	High	High	18368.8	17846	18495.1	18436	19080.8	18086.1	19907.6	19751.6	18358.7	19037	18571.3	18100.9	1	12848.1
High	Master Protein	Q59L42	rDNA-binding RNA polymerase I transcriptional factor OS=Candida albicans (strain SC5314 / ATCC MYA-2876) OX=237561 GN=RRN3 PE=3 SV=1	2	2	0.372413	0.888644	0.424502	1.156	1.109	1.171	0.21	0.15	0.23	205.4	197	208	177.6	6.84	4.62	8.49	14.46	2	High	High	High	High	High	High	High	High	High	High	High	High	228.6	201.9	205.4	197	205.1	187	229.3	193.8	208	177.6	166.3	217.9	1	159.9
High	None	Q59RR7	Phosphotransferase OS=Candida albicans (strain SC5314 / ATCC MYA-2876) OX=237561 GN=GLK4 PE=3 SV=1	17	63	0.298607	0.62159	0.425614	1.039	1.045	1.035	0.06	0.06	0.05	9724.4	9777.1	9679.4	9355.7	1.68	4.93	0.85	1.02	17	High	High	High	High	High	High	High	High	High	High	High	High	9630.2	9724.4	9949.9	10018.3	9102.1	9777.1	9679.4	9636.3	9796	9463.7	9355.7	9273.7	1	6735.9
High	Master Protein	Q59WB7	GTPase OS=Candida albicans (strain SC5314 / ATCC MYA-2876) OX=237561 GN=RIA1 PE=4 SV=1	17	21	0.479142	0.954232	0.425769	1.066	1.023	1.066	0.09	0.03	0.09	1881	1805	1881.7	1764.8	2.37	2.29	2.54	4.01	17	High	High	High	High	High	High	High	High	High	High	High	High	1881	1897.2	1813.8	1805	1789.8	1868.4	1816.1	1908.4	1881.7	1752.1	1764.8	1883	1	1315.7
High	Master Protein	Q5APF2	GMP synthase [glutamine-hydrolyzing] OS=Candida albicans (strain SC5314 / ATCC MYA-2876) OX=237561 GN=GUA1 PE=3 SV=1	43	268	0.822834	0.686035	0.427079	0.984	0.998	1.03	-0.02	0	0.04	47649.8	48327.5	49917.7	48441.8	0.36	3.58	1.58	1.79	43	High	High	High	High	High	High	High	High	High	High	High	High	47850.9	47649.8	47511.6	48327.5	48572.3	45515.2	48975.9	50542.1	49917.7	48441.8	49262.9	47533.9	1	33469.6
Low	Master Protein	A0A1D8PPW3	Uncharacterized protein OS=Candida albicans (strain SC5314 / ATCC MYA-2876) OX=237561 GN=orf19.5514 PE=4 SV=1	1	3	0.966402	0.685646	0.427698	1.215	0.619	0.889	0.28	-0.69	-0.17	2915.9	1485.9	2134	2400.8	13.6	40.36	53.6	22.16	1	High	High	High	High	High	High	High	High	High	High	High	High	2512.2	3303.7	2915.9	2564.8	1485.9	1226	621.7	2138.2	2134	2400.8	3111	2015.1	1	1757.1
High	Master Protein	A0A1D8PEV9	Mitochondrial 37S ribosomal protein MRPS5 OS=Candida albicans (strain SC5314 / ATCC MYA-2876) OX=237561 GN=orf19.989 PE=3 SV=1	14	70	0.589474	0.936302	0.428138	0.987	1.003	1.028	-0.02	0	0.04	8903.2	9053	9270	9021.9	1.57	1.43	0.94	1.93	14	High	High	High	High	High	High	High	High	High	High	High	High	8903.2	9047.9	8767.6	9053	9065.8	8837.8	9130.3	9289.5	9270	9021.9	8891.5	9237	1	6227.4
High	Master Protein	Q59PZ4	60S ribosomal export protein NMD3 OS=Candida albicans (strain SC5314 / ATCC MYA-2876) OX=237561 GN=NMD3 PE=3 SV=1	22	64	0.988154	0.981125	0.429131	1.007	1	1.014	0.01	0	0.02	10349.5	10282.4	10425.8	10277.6	0.98	2.89	3.25	0.21	21	High	High	High	High	High	High	High	High	High	High	High	High	10429	10349.5	10228.7	10088	10282.4	10675.8	10344.7	10425.8	10976.9	10297.4	10253.8	10277.6	1	7294.6
High	Master Protein	A0A1D8PJT8	Ubiquinol--cytochrome-c reductase subunit 6 OS=Candida albicans (strain SC5314 / ATCC MYA-2876) OX=237561 GN=orf19.913.2 PE=1 SV=1	6	31	0.934795	0.904103	0.429471	1.03	1.026	0.906	0.04	0.04	-0.14	6299.7	6275.9	5542.4	6114.7	2.28	7.2	23.53	10.59	6	High	High	High	High	High	High	High	High	High	High	High	High	6299.7	6372.9	6097.6	6275.9	5910.6	6817.6	3599.2	5542.4	5674.1	5157.1	6114.7	6320.2	1	4406.4
High	Master Protein	P0CY19	Deoxyuridine 5'-triphosphate nucleotidohydrolase OS=Candida albicans (strain SC5314 / ATCC MYA-2876) OX=237561 GN=DUT1 PE=3 SV=1	13	44	0.989991	0.319049	0.429752	0.976	1.055	1.058	-0.04	0.08	0.08	7089.7	7664.1	7684.4	7265.3	3.84	2.24	3.38	3.81	13	High	High	High	High	High	High	High	High	High	High	High	High	7488.3	6959.5	7089.7	7426.5	7664.1	7757.9	7272.1	7739.3	7684.4	7265.3	6950.5	7500.4	1	5237.7
Low	Master Protein	A0A1D8PEJ0	Uncharacterized protein OS=Candida albicans (strain SC5314 / ATCC MYA-2876) OX=237561 GN=MNN47 PE=4 SV=1	1	2	0.918177	0.995519	0.42998	0.978	1.049	1.106	-0.03	0.07	0.15	562.6	603.7	636.2	575.3	2.8	9.31	3.38	5.16	1	High	High	High	High	High	High	High	High	High	High	High	High	545.3	562.6	576.8	603.7	630.8	525.6	637.7	636.2	600.5	575.3	551.4	610.8	1	381.4
Low	None	Q5AFV3	Structure-specific endonuclease subunit SLX4 OS=Candida albicans (strain SC5314 / ATCC MYA-2876) OX=237561 GN=SLX4 PE=3 SV=2	1	3	0.999999	0.113394	0.43194	0.985	1.129	1.071	-0.02	0.18	0.1	921.5	1056.1	1002	935.2	2.53	7.66	6.55	2.29	1	High	High	High	High	High	High	High	High	High	High	High	High	918.9	961.1	921.5	964.3	1056.1	1124.4	936.2	1002	1067.4	935.2	911	953.7	1	642.7
High	Master Protein	A0A1D8PCZ5	Uncharacterized protein OS=Candida albicans (strain SC5314 / ATCC MYA-2876) OX=237561 GN=ARP7 PE=3 SV=1	10	27	0.627536	0.828583	0.432271	1.031	1.014	1.051	0.04	0.02	0.07	5960.2	5862.6	6080.5	5783.7	0.71	2.59	2.09	2.81	10	High	High	High	High	High	High	High	High	High	High	High	High	5960.2	6020.7	5938.4	5829.4	5862.6	6110.2	6091.4	5868.1	6080.5	5783.7	5718.8	6030.1	1	4168.9
High	Master Protein	Q5AM80	Enolase-phosphatase E1 OS=Candida albicans (strain SC5314 / ATCC MYA-2876) OX=237561 GN=UTR4 PE=3 SV=1	7	18	0.983147	0.449247	0.432764	1.009	1.071	1.061	0.01	0.1	0.09	2369.9	2516.5	2492.6	2349	2.75	6.33	4.31	3.46	7	High	High	High	High	High	High	High	High	High	High	High	High	2471.7	2369.9	2348.4	2342.1	2516.5	2658.7	2621.5	2406.8	2492.6	2349	2294.2	2455.4	1	1728.8
High	Master Protein	Q59U89	SBDS domain-containing protein OS=Candida albicans (strain SC5314 / ATCC MYA-2876) OX=237561 GN=orf19.1862 PE=4 SV=1	11	101	0.893111	0.270345	0.432948	0.921	1.07	0.89	-0.12	0.1	-0.17	16104.8	18707	15562.3	17489.1	7.6	12.13	10.84	7.34	11	High	High	High	High	High	High	High	High	High	High	High	High	17164.3	14738.8	16104.8	18707	18246.5	22629.7	13102.9	15562.3	16159.6	17489.1	15495.1	17776	1	12005.7
High	Master Protein	A0A1D8PJ95	MMS19 nucleotide excision repair protein (Fragment) OS=Candida albicans (strain SC5314 / ATCC MYA-2876) OX=237561 GN=MET18 PE=3 SV=1	1	1	0.895914	0.569536	0.433614	1.05	1.06	1.112	0.07	0.08	0.15	480.3	484.6	508.6	457.3	0.38	16.72	10.89	5.33	1	High	High	High	High	High	High	High	High	High	High	High	High	480.3	483.5	480.3	484.6	443.4	607.9	508.6	470.6	582.1	457.3	429.6	477.9	1	336
High	Master Protein	A0A1D8PHC7	Rxt3p OS=Candida albicans (strain SC5314 / ATCC MYA-2876) OX=237561 GN=RXT3 PE=4 SV=1	4	6	0.996194	0.369206	0.433898	0.976	1.142	1.12	-0.04	0.19	0.16	802.2	938.7	920.7	822.1	5.47	17.32	7.43	3.82	4	High	High	High	High	High	High	High	High	High	High	High	High	851.1	802.2	763.1	938.7	794.9	1123.9	920.7	872.4	1009.2	786.7	822.1	849.1	1	595.3
Low	Master Protein	Q5A7S7	Fork-head transcriptional regulator 2 OS=Candida albicans (strain SC5314 / ATCC MYA-2876) OX=237561 GN=FKH2 PE=2 SV=2	1	2	0.258738	0.833034	0.434288	1.249	0.99	0.847	0.32	-0.01	-0.24	541.1	428.8	366.9	433.2	4.25	14.64	22.36	6.17	1	High	High	High	High	High	High	High	High	High	High	High	High	541.1	575	530.3	430.9	428.8	329.4	448.8	366.9	284.8	408.3	461.8	433.2	1	378.5
High	Master Protein	A0A1D8PT49	Serine/threonine protein kinase OS=Candida albicans (strain SC5314 / ATCC MYA-2876) OX=237561 GN=CAALFM_CR06040WA PE=4 SV=1	2	3	0.553624	0.857322	0.434299	1.073	0.972	0.93	0.1	-0.04	-0.1	237.2	214.7	205.5	220.9	4.69	8.59	4.61	1.78	2	High	High	High	High	High	High	High	High	High	High	High	High	245.7	223.8	237.2	214.7	195.6	232.5	216.2	197.3	205.5	225.7	220.9	217.8	1	171.9
High	Master Protein	Q5A0I8	Sgt2p OS=Candida albicans (strain SC5314 / ATCC MYA-2876) OX=237561 GN=SGT2 PE=3 SV=1	23	108	0.708385	0.99797	0.434349	1.022	1.006	0.986	0.03	0.01	-0.02	29688	29221.8	28629.4	29042.3	0.36	2.59	3.71	0.88	23	High	High	High	High	High	High	High	High	High	High	High	High	29828.1	29688	29617.4	29643.6	29221.8	28181.8	27068.1	29056.7	28629.4	28888.3	29042.3	29387.4	1	20863.5
High	Master Protein	Q5A4Z5	Uncharacterized protein OS=Candida albicans (strain SC5314 / ATCC MYA-2876) OX=237561 GN=orf19.951 PE=4 SV=1	2	3	0.470166	0.564804	0.434928	1.084	0.981	0.929	0.12	-0.03	-0.11	609.6	551.6	522.3	562.3	1.93	9.28	8.68	1.98	2	High	High	High	High	High	High	High	High	High	High	High	High	609.6	629.7	608.6	563.7	551.6	473.2	567.5	522.3	476.8	562.3	559.9	580.4	1	426.4
High	Master Protein	A0A1D8PEM3	Doa1p OS=Candida albicans (strain SC5314 / ATCC MYA-2876) OX=237561 GN=DOA1 PE=4 SV=1	10	29	0.997467	0.963655	0.435199	0.975	1	0.935	-0.04	0	-0.1	3132	3211.8	3004.3	3211.5	3.06	0.43	4.89	2.77	10	High	High	High	High	High	High	High	High	High	High	High	High	3265.4	3132	3077.3	3225.6	3198.1	3211.8	3004.3	3212	2922.8	3073.2	3211.5	3235.9	1	2284
High	Master Protein	A0A1D8PM29	Exocyst complex component SEC15 OS=Candida albicans (strain SC5314 / ATCC MYA-2876) OX=237561 GN=SEC15 PE=3 SV=1	3	11	0.0949349	0.402243	0.435578	1.075	0.898	0.912	0.1	-0.16	-0.13	624.6	521.7	530	581.2	1.04	6.08	2.06	6.05	2	High	High	High	High	High	High	High	High	High	High	High	High	624.6	619.5	632.4	570.4	521.7	508.8	526.3	530	547	591.5	581.2	527.6	1	436.9
High	Master Protein	Q59QC2	Chromatin modification-related protein EAF6 OS=Candida albicans (strain SC5314 / ATCC MYA-2876) OX=237561 GN=EAF6 PE=3 SV=1	1	4	0.377137	0.0585326	0.435771	1.068	1.105	1.078	0.1	0.14	0.11	253.4	262	255.6	237.2	6.59	8.04	5.28	4.37	1	High	High	High	High	High	High	High	High	High	High	High	High	237.1	253.4	270.5	262	257.2	297.3	263	237.2	255.6	220.8	237.2	239.3	1	165.8
High	Master Protein	P84149	mRNA export factor MEX67 OS=Candida albicans (strain SC5314 / ATCC MYA-2876) OX=237561 GN=MEX67 PE=1 SV=2	10	17	0.995134	0.400518	0.437073	0.997	1.051	1.067	0	0.07	0.09	2157.2	2274	2309.1	2164.5	3.22	9.9	6.28	3.94	10	High	High	High	High	High	High	High	High	High	High	High	High	2242.7	2104.5	2157.2	2243.8	2274	2668.8	2309.1	2282.4	2553.6	2164.5	2127.3	2292	1	1568.7
High	Master Protein	Q9B8D1	NADH-ubiquinone oxidoreductase chain 3 OS=Candida albicans (strain SC5314 / ATCC MYA-2876) OX=237561 GN=NAD3 PE=3 SV=2	3	11	0.863562	0.613133	0.437289	1.019	0.932	0.922	0.03	-0.1	-0.12	2169.2	1983.9	1961.9	2128.4	3.79	3.9	12.07	6.35	3	High	High	High	High	High	High	High	High	High	High	High	High	2131.8	2169.2	2291.2	1853.9	1986	1983.9	1659.2	2112	1961.9	1951.8	2128.4	2212.8	1	1491.1
High	Master Protein	A0A1D8PRG1	CCR4-NOT core subunit OS=Candida albicans (strain SC5314 / ATCC MYA-2876) OX=237561 GN=orf19.7198 PE=3 SV=1	3	7	0.656803	0.998058	0.438407	1.031	0.987	0.977	0.04	-0.02	-0.03	1920.8	1839.3	1821.9	1863.9	1.27	1.43	6.03	3.75	3	High	High	High	High	High	High	High	High	High	High	High	High	1920.8	1958.8	1912.8	1836.9	1884	1839.3	1655.4	1855.7	1821.9	1793.7	1933.7	1863.9	1	1343.5
High	Master Protein	A0A1D8PLE6	Uncharacterized protein OS=Candida albicans (strain SC5314 / ATCC MYA-2876) OX=237561 GN=orf19.4639 PE=4 SV=1	7	19	0.00316626	0.0390497	0.439516	0.931	1.062	1.035	-0.1	0.09	0.05	3892.9	4437.5	4325.9	4179.9	0.64	2.4	1.77	1.94	7	High	High	High	High	High	High	High	High	High	High	High	High	3892.9	3916.4	3866.5	4314.1	4437.5	4525.5	4226.3	4325.9	4375.9	4147.8	4179.9	4302.6	1	2722.9
High	Master Protein	A0A1D8PCV7	Alpha-aminoadipate reductase OS=Candida albicans (strain SC5314 / ATCC MYA-2876) OX=237561 GN=LYS2 PE=3 SV=1	50	129	0.575143	0.223576	0.439689	1.04	1.061	1.048	0.06	0.09	0.07	22823.6	23275.4	23000.9	21938.6	1.4	2	0.45	3.61	50	High	High	High	High	High	High	High	High	High	High	High	High	22823.6	23284.7	22668.9	22783.5	23275.4	23711.3	23144.8	22942.1	23000.9	21938.6	21932.8	23335.1	1	15964.1
Medium	Master Protein	Q5A2B6	RF_PROK_I domain-containing protein OS=Candida albicans (strain SC5314 / ATCC MYA-2876) OX=237561 GN=orf19.425 PE=4 SV=1	1	3	0.999929	0.37334	0.441221	0.991	0.93	0.887	-0.01	-0.11	-0.17	1036.4	972.1	927.1	1045.6	2.35	11.14	5.28	4.09	1	High	High	High	High	High	High	High	High	High	High	High	High	1008.1	1036.4	1056.5	1038.6	972.1	831.8	927.1	1009.7	918.7	991.3	1045.6	1074.9	1	705.1
High	Master Protein	Q5A6M6	Coatomer subunit beta OS=Candida albicans (strain SC5314 / ATCC MYA-2876) OX=237561 GN=SEC26 PE=4 SV=1	46	147	0.815317	0.800754	0.441555	1.014	1.017	1.015	0.02	0.02	0.02	30016.5	30121.1	30051.6	29615.5	1.45	2.01	4.66	0.86	46	High	High	High	High	High	High	High	High	High	High	High	High	30520.2	29654.4	30016.5	30121.1	30670.9	29462.7	32144.9	30051.6	29425.9	29665.5	29202.2	29615.5	1	21347.6
High	Master Protein	Q5A2T2	ATP-binding cassette family ATPase OS=Candida albicans (strain SC5314 / ATCC MYA-2876) OX=237561 GN=KRE30 PE=4 SV=1	40	252	0.997063	0.798096	0.442315	1.005	1.02	1.033	0.01	0.03	0.05	37698.4	38259	38737.9	37518.4	0.42	3.07	0.83	1.62	40	High	High	High	High	High	High	High	High	High	High	High	High	37533.8	37698.4	37846.8	37180.7	38259	39532.9	38737.9	38339.7	38979.2	37388.4	37518.4	38508.6	1	26253.3
High	Master Protein	A0A1D8PE35	Transcriptional activator HAP2 OS=Candida albicans (strain SC5314 / ATCC MYA-2876) OX=237561 GN=HAP2 PE=3 SV=1	1	3	0.962783	0.983274	0.443386	1.025	0.996	1.07	0.04	-0.01	0.1	195.9	190.5	204.6	191.2	3.26	5.06	4.91	1.52	1	High	High	High	High	High	High	High	High	High	High	High	High	188	195.9	200.5	205.3	190.5	186.7	210.2	190.9	204.6	189.2	191.2	195	1	131.5
High	Master Protein	A0A1D8PMQ0	Proteasome regulatory particle lid subunit OS=Candida albicans (strain SC5314 / ATCC MYA-2876) OX=237561 GN=SEM1 PE=4 SV=1	8	45	0.735584	0.777532	0.44357	0.88	1.07	0.942	-0.18	0.1	-0.09	10041.9	12215.3	10755.7	11415.2	9.34	2.83	15.96	4.53	8	High	High	High	High	High	High	High	High	High	High	High	High	11320.1	9442.1	10041.9	12262.5	12215.3	11649.5	8068.1	10844.7	10755.7	11415.2	10563.7	11459.3	1	7917.9
High	Master Protein	Q5A6A1	Ribosomal 60S subunit protein L24A OS=Candida albicans (strain SC5314 / ATCC MYA-2876) OX=237561 GN=RPL24A PE=3 SV=1	15	119	0.981966	0.0872946	0.443881	1.003	0.888	0.918	0	-0.17	-0.12	48824.5	43236.5	44715.5	48693.7	2.81	4.18	4.31	5.34	15	High	High	High	High	High	High	High	High	High	High	High	High	46921	49554.8	48824.5	45251.4	43236.5	41631.7	47459.3	44715.5	43678.7	48693.7	49878.2	44983.3	1	32819.2
High	Master Protein	Q5AJD9	Acyl-coenzyme A oxidase OS=Candida albicans (strain SC5314 / ATCC MYA-2876) OX=237561 GN=POX1-3 PE=3 SV=1	20	64	0.146458	0.993241	0.444223	1.027	0.967	0.966	0.04	-0.05	-0.05	8035.2	7564.3	7555.4	7822	1.2	2.52	1.69	3.05	19	High	High	High	High	High	High	High	High	High	High	High	High	8035.2	8160.5	7969.7	7549.8	7564.3	7891.2	7340.2	7555.4	7563	7435.4	7822	7860.6	1	5620.2
High	Master Protein	P12461	Thymidylate synthase OS=Candida albicans (strain SC5314 / ATCC MYA-2876) OX=237561 GN=TMP1 PE=3 SV=3	9	18	0.887105	0.717953	0.444439	0.974	1.015	1.064	-0.04	0.02	0.09	2583.4	2693.9	2822.6	2653.2	3.5	3.23	2.83	2.82	9	High	High	High	High	High	High	High	High	High	High	High	High	2728.5	2558.6	2583.4	2692.4	2693.9	2846.5	2826.6	2688.6	2822.6	2653.2	2606.4	2753.9	1	1908.5
High	Master Protein	A0A1D8PL79	tRNA adenylyltransferase OS=Candida albicans (strain SC5314 / ATCC MYA-2876) OX=237561 GN=orf19.4705 PE=3 SV=1	7	9	0.82204	0.768725	0.444854	0.983	0.964	0.943	-0.02	-0.05	-0.08	1140.8	1119.1	1094.3	1160.4	3.35	1.37	4.53	3.42	6	High	High	High	High	High	High	High	High	High	High	High	High	1077.6	1144.4	1140.8	1101.2	1119.1	1131.6	1052.9	1152.1	1094.3	1104.1	1179.6	1160.4	1	753.8
High	Master Protein	Q5A346	Tsr1p OS=Candida albicans (strain SC5314 / ATCC MYA-2876) OX=237561 GN=TSR1 PE=4 SV=1	25	62	0.999908	0.236966	0.44559	1.007	0.965	0.95	0.01	-0.05	-0.07	10052.3	9635	9488.8	9984.3	2.33	3.19	3.22	2.13	25	High	High	High	High	High	High	High	High	High	High	High	High	10147.3	10052.3	9706.1	9635	9759.4	9182.3	9428	9993.9	9488.8	9768.7	9984.3	10193.4	1	7097.6
High	Master Protein	Q5ANL6	13 kDa ribonucleoprotein-associated protein OS=Candida albicans (strain SC5314 / ATCC MYA-2876) OX=237561 GN=SNU13 PE=3 SV=1	7	23	0.558696	0.793907	0.447235	0.985	1	1.079	-0.02	0	0.11	7164.9	7270.4	7842.3	7271.2	1.18	3.46	2.72	4.86	7	High	High	High	High	High	High	High	High	High	High	High	High	7072.9	7241.5	7164.9	7270.4	7483.7	6984.3	7508.4	7899.1	7842.3	7846	7179.7	7271.2	1	4947.2
High	Master Protein	A0A1D8PCV9	Phosphodiesterase OS=Candida albicans (strain SC5314 / ATCC MYA-2876) OX=237561 GN=PDE2 PE=3 SV=1	2	2	0.614015	0.90072	0.447254	1.055	0.992	1.058	0.08	-0.01	0.08	414.1	389.5	415.4	392.6	2.22	5.56	3.69	3.89	2	High	High	High	High	High	High	High	High	High	High	High	High	414.1	414.1	398.4	388.1	389.5	427.5	396.9	427.2	415.4	392.6	377.3	407.9	1	289.6
High	Master Protein	A0A1D8PN68	NEDD8-activating enzyme E1 regulatory subunit OS=Candida albicans (strain SC5314 / ATCC MYA-2876) OX=237561 GN=orf19.4153 PE=3 SV=1	4	13	0.995074	0.358397	0.449222	1.032	1.075	1.094	0.05	0.1	0.13	834.4	868.7	884	808.4	1.31	14.05	7.48	6.35	4	High	High	High	High	High	High	High	High	High	High	High	High	851.6	834.4	831.1	852.7	868.7	1088.1	884	876.7	999.4	808.4	785.9	885.9	1	595.7
High	Master Protein	A0A1D8PCY4	Ecm33p OS=Candida albicans (strain SC5314 / ATCC MYA-2876) OX=237561 GN=ECM33 PE=3 SV=1	15	209	0.605803	0.341192	0.449538	0.954	1.032	1.061	-0.07	0.05	0.09	29580.6	32007.6	32905.5	31008.1	1.31	8.41	3.92	2.53	15	High	High	High	High	High	High	High	High	High	High	High	High	30096.4	29338.1	29580.6	31754.2	32007.6	36757.3	34541.8	31974.2	32905.5	32037.1	30488.3	31008.1	1	21051.1
High	Master Protein	Q5A4L3	PWWP domain-containing protein OS=Candida albicans (strain SC5314 / ATCC MYA-2876) OX=237561 GN=orf19.3428 PE=4 SV=1	4	5	0.144656	0.527939	0.450768	1.127	0.943	0.917	0.17	-0.09	-0.12	1839.7	1539.4	1498.2	1633	7.18	0.29	9.36	1.7	4	High	High	High	High	High	High	High	High	High	High	High	High	1731.9	1996.9	1839.7	1539.4	1534	1542.9	1689.5	1408.8	1498.2	1633	1628.9	1679.3	1	1211.4
High	Master Protein	Q5A5E0	Dihydrofolate reductase OS=Candida albicans (strain SC5314 / ATCC MYA-2876) OX=237561 GN=DFR1 PE=3 SV=1	1	1	0.996356	0.464447	0.454215	1.032	1.148	1.1	0.05	0.2	0.14	248.3	276.4	264.8	240.7	8.82	30.6	20.3	7.4	1	High	High	High	High	High	High	High	High	High	High	High	High	257.2	216.8	248.3	225.9	276.4	405.4	264.8	261.9	368.3	213.2	240.7	244.9	1	179.9
High	Master Protein	Q59ST1	S-methyl-5'-thioadenosine phosphorylase OS=Candida albicans (strain SC5314 / ATCC MYA-2876) OX=237561 GN=MEU1 PE=3 SV=1	11	33	0.940382	0.97319	0.454215	0.949	1.036	1.014	-0.08	0.05	0.02	3420	3733.4	3652.5	3603.7	1.67	7.7	10.18	3.42	10	High	High	High	High	High	High	High	High	High	High	High	High	3510.5	3420	3403.3	3860.9	3733.4	3324.2	4328.5	3638.6	3652.5	3413.2	3638.6	3603.7	1	2455.4
High	Master Protein	A0A1D8PNQ8	Mdj1p OS=Candida albicans (strain SC5314 / ATCC MYA-2876) OX=237561 GN=MDJ1 PE=3 SV=1	13	46	0.675332	0.774573	0.454484	1.022	1.025	1.038	0.03	0.04	0.05	9896.1	9926.5	10054.6	9685.3	1.24	3.29	1.49	1.15	13	High	High	High	High	High	High	High	High	High	High	High	High	10061.2	9896.1	9821.1	9561.5	10210.9	9926.5	9822.3	10100.4	10054.6	9670.6	9685.3	9872.2	1	7037.3
High	Master Protein	A0A1D8PSY8	Crg1p OS=Candida albicans (strain SC5314 / ATCC MYA-2876) OX=237561 GN=CRG1 PE=4 SV=1	5	12	0.559201	0.895721	0.454813	0.924	0.955	0.891	-0.11	-0.07	-0.17	2264.8	2340.9	2185.5	2452	2.8	1.91	12.39	0.05	5	High	High	High	High	High	High	High	High	High	High	High	High	2238	2264.8	2359.7	2417.8	2338	2340.9	2590.9	2185.5	2048.8	2452	2452.1	2450	1	1565.4
High	Master Protein	Q5A302	Endoplasmic reticulum vesicle protein 25 OS=Candida albicans (strain SC5314 / ATCC MYA-2876) OX=237561 GN=ERV25 PE=3 SV=1	8	62	0.999665	0.250338	0.454936	0.999	1.041	1.052	0	0.06	0.07	6665	6945.7	7017.4	6673.5	2.12	6.33	2.03	1.71	8	High	High	High	High	High	High	High	High	High	High	High	High	6811.1	6665	6528.7	6689.8	6945.7	7560.4	7017.4	6795.3	7057.3	6525.4	6673.5	6749.7	1	4764
High	Master Protein	A0A1D8PSL3	Protein transport protein SEC22 OS=Candida albicans (strain SC5314 / ATCC MYA-2876) OX=237561 GN=SEC22 PE=3 SV=1	5	13	0.299409	0.544426	0.455122	1.054	1.052	1.033	0.08	0.07	0.05	2183	2178.9	2139.3	2070.4	0.35	4.89	4.95	2.18	5	High	High	High	High	High	High	High	High	High	High	High	High	2192.1	2183	2177	2178.9	2241.1	2035.8	2279.8	2139.3	2069.5	2070.4	2015.9	2105.2	1	1533.3
High	Master Protein	A0A1D8PEV4	Ribosomal 60S subunit protein L42A OS=Candida albicans (strain SC5314 / ATCC MYA-2876) OX=237561 GN=RPL42 PE=3 SV=1	8	54	0.708349	0.158442	0.457654	1.096	0.863	0.925	0.13	-0.21	-0.11	23403.1	18422.2	19752.8	21347.1	5.69	11.27	5.6	5.2	8	High	High	High	High	High	High	High	High	High	High	High	High	21604.5	24159.6	23403.1	21061.6	18422.2	16874.2	20762.7	19752.8	18560.5	21347.1	22827.3	20625	1	15111.4
High	Master Protein	A0A1D8PTI0	mRNA splicing protein OS=Candida albicans (strain SC5314 / ATCC MYA-2876) OX=237561 GN=CAALFM_CR07510WA PE=4 SV=1	4	5	0.999356	0.808327	0.457785	1.019	1.034	1.051	0.03	0.05	0.07	872.9	885.3	899.8	856.5	1.15	4.19	8.16	2.89	4	High	High	High	High	High	High	High	High	High	High	High	High	878.7	872.9	859.1	867.5	885.3	939.7	899.8	860.4	1005.9	847.9	856.5	894.9	1	614.6
High	Master Protein	A0A1D8PMU8	Importin subunit alpha OS=Candida albicans (strain SC5314 / ATCC MYA-2876) OX=237561 GN=orf19.5682 PE=3 SV=1	24	108	0.865945	0.355732	0.45795	1.005	0.979	0.982	0.01	-0.03	-0.03	22229.8	21644.2	21720.3	22112.4	1.18	1.57	3.06	0.14	24	High	High	High	High	High	High	High	High	High	High	High	High	22684.8	22222.3	22229.8	21644.2	21833.9	21175.8	22236.4	21720.3	20923.2	22156.6	22099.3	22112.4	1	15867
High	Master Protein	A0A1D8PPF1	Uncharacterized protein OS=Candida albicans (strain SC5314 / ATCC MYA-2876) OX=237561 GN=orf19.4192.1 PE=4 SV=1	4	17	0.958501	0.985854	0.45897	0.993	1.059	1.012	-0.01	0.08	0.02	874.8	932.6	891.4	881	1.96	3.84	12.18	6.34	4	High	High	High	High	High	High	High	High	High	High	High	High	904.9	874.8	874.8	965.2	932.6	893.9	717.5	895.7	891.4	881	877.4	979.3	1	632.9
High	Master Protein	A0A1D8PPB0	V-type proton ATPase subunit a OS=Candida albicans (strain SC5314 / ATCC MYA-2876) OX=237561 GN=STV1 PE=3 SV=1	3	3	0.0719211	0.0961641	0.459361	1.096	1.09	1.055	0.13	0.12	0.08	447.2	445	430.8	408.2	1.03	5.37	2.66	2.86	3	High	High	High	High	High	High	High	High	High	High	High	High	447.2	443.1	452.3	445	421.7	469.5	442.1	419.2	430.8	404.2	408.2	426.4	1	312.8
High	Master Protein	Q59YC3	Ca(2+)-binding ATP:ADP antiporter OS=Candida albicans (strain SC5314 / ATCC MYA-2876) OX=237561 GN=orf19.1403 PE=3 SV=1	3	4	0.970821	0.872371	0.459795	1.006	0.927	0.895	0.01	-0.11	-0.16	167.4	154.3	148.9	166.4	7.93	8.89	7.99	2.99	3	High	High	High	High	High	High	High	High	High	High	High	High	146.7	170.1	167.4	154.3	146.9	174.1	164.1	148.9	140.2	159.9	166.4	169.7	1	102.6
High	Master Protein	A0A1D8PN37	Uncharacterized protein OS=Candida albicans (strain SC5314 / ATCC MYA-2876) OX=237561 GN=orf19.1953 PE=4 SV=1	7	13	0.862679	0.999968	0.460233	1.003	0.989	0.936	0	-0.02	-0.1	1116.8	1100.9	1042.1	1113.6	3.05	3.07	3.74	3.66	7	High	High	High	High	High	High	High	High	High	High	High	High	1116.8	1149.9	1081.7	1057	1122.9	1100.9	1010	1087.9	1042.1	1046.4	1117.3	1113.6	1	781.1
High	Master Protein	Q8NJN3	Acetyl-coenzyme A synthetase 2 OS=Candida albicans (strain SC5314 / ATCC MYA-2876) OX=237561 GN=ACS2 PE=1 SV=3	43	261	0.29283	0.689272	0.461368	1.031	0.967	0.964	0.04	-0.05	-0.05	50016.2	46937.3	46777.5	48530.9	2.18	2.45	1.66	2.24	41	High	High	High	High	High	High	High	High	High	High	High	High	48674.9	50831.2	50016.2	48532.7	46937.3	46278.1	47730.9	46777.5	46185.5	46979.4	49049.4	48530.9	1	34045.9
High	Master Protein	A0A1D8PDU3	Ribosomal 40S subunit protein S23B OS=Candida albicans (strain SC5314 / ATCC MYA-2876) OX=237561 GN=RPS23A PE=3 SV=1	11	229	0.145415	0.997306	0.462256	0.953	1.008	1.041	-0.07	0.01	0.06	37948.4	40159.2	41475.8	39835.3	0.76	1.86	5.13	3.87	11	High	High	High	High	High	High	High	High	High	High	High	High	38319.9	37753.5	37948.4	39818	40159.2	41255.1	44865.3	40811.4	41475.8	42449.9	39835.3	39625.6	1	26803.1
High	Master Protein	Q59Z38	NADPH:quinone reductase OS=Candida albicans (strain SC5314 / ATCC MYA-2876) OX=237561 GN=orf19.2262 PE=4 SV=1	7	19	0.888775	0.576369	0.464452	1.005	1.02	1.031	0.01	0.03	0.04	3336.6	3385.2	3422.9	3319.8	1.22	1.85	2.93	1.59	7	High	High	High	High	High	High	High	High	High	High	High	High	3336.6	3384.9	3304.1	3308.7	3385.2	3432.5	3464.5	3422.9	3275.7	3319.8	3244.3	3344.9	1	2333.8
High	Master Protein	P78594	Cytosine deaminase OS=Candida albicans (strain SC5314 / ATCC MYA-2876) OX=237561 GN=FCA1 PE=3 SV=1	7	32	0.958412	0.995571	0.465512	0.973	0.991	0.978	-0.04	-0.01	-0.03	5575.9	5675.9	5601.1	5729.1	1.94	1.55	10.95	2.7	7	High	High	High	High	High	High	High	High	High	High	High	High	5575.9	5586.4	5395.5	5654.3	5817.5	5675.9	4603	5603.8	5601.1	5729.1	5478.3	5755.1	1	3900.1
High	Master Protein	A0A1D8PIC2	Uncharacterized protein OS=Candida albicans (strain SC5314 / ATCC MYA-2876) OX=237561 GN=orf19.216.1 PE=4 SV=1	1	1	0.994449	0.999543	0.465618	0.985	1.019	1.046	-0.02	0.03	0.06	394.5	408.2	418.7	400.4	0.79	4.54	4.21	4.38	1	High	High	High	High	High	High	High	High	High	High	High	High	398.4	394.5	392.2	408.2	412	378.8	435	399.9	418.7	414.6	379.9	400.4	1	278.7
Medium	Master Protein	Q5ANJ8	Rax1p OS=Candida albicans (strain SC5314 / ATCC MYA-2876) OX=237561 GN=RAX1 PE=4 SV=1	1	1	0.925559	0.822421	0.465867	1.051	1.043	1.137	0.07	0.06	0.19	141.8	140.8	153.4	134.9	7.88	11.21	4.16	8.37	1	High	High	High	High	High	High	High	High	High	High	High	High	141.8	134.7	157	135	140.8	166	153.4	146.9	159.7	151.8	129.6	134.9	1	99.2
High	Master Protein	A0A1D8PN67	Uncharacterized protein OS=Candida albicans (strain SC5314 / ATCC MYA-2876) OX=237561 GN=orf19.4132 PE=3 SV=1	2	5	0.714673	0.996853	0.466728	1.088	1.008	0.946	0.12	0.01	-0.08	270.6	250.7	235.3	248.8	5.9	2.62	7.21	7.97	2	High	High	High	High	High	High	High	High	High	High	High	High	286.2	254.3	270.6	248.2	250.7	260.7	221	255	235.3	240.7	279.4	248.8	1	200.2
High	Master Protein	Q59SM8	Trifunctional formate-tetrahydrofolate ligase/methenyltetrahydrofolate cyclohydrolase/methylenetetrahydrofolate dehydrogenase OS=Candida albicans (strain SC5314 / ATCC MYA-2876) OX=237561 GN=MIS11 PE=3 SV=1	66	334	0.99831	0.263977	0.467177	0.992	1.023	1.013	-0.01	0.03	0.02	60907.7	62813.5	62229.5	61415.8	0.91	3.2	3.32	2.78	63	High	High	High	High	High	High	High	High	High	High	High	High	60907.7	60023	61038.1	62189	62813.5	65987.3	65365.4	61394.7	62229.5	61415.8	58997.1	62260.8	1	42602.3
Medium	Master Protein	A0A1D8PDQ5	Uncharacterized protein OS=Candida albicans (strain SC5314 / ATCC MYA-2876) OX=237561 GN=orf19.2663 PE=4 SV=1	1	1	0.815204	0.614473	0.467439	1.121	1.086	1.121	0.16	0.12	0.17	200.7	194.4	200.8	179.1	1.68	21.12	15.88	6.89	1	High	High	High	High	High	High	High	High	High	High	High	High	200.7	205.7	199.2	180.4	194.4	264.4	195.4	200.8	257.9	174.4	179.1	198.3	1	140.4
High	Master Protein	Q5A5N9	DNA-directed RNA polymerase subunit OS=Candida albicans (strain SC5314 / ATCC MYA-2876) OX=237561 GN=RPC11 PE=3 SV=1	2	14	0.981798	0.999518	0.469703	0.943	0.988	0.958	-0.08	-0.02	-0.06	1203.3	1260	1222.2	1275.6	4.68	1.64	12.42	2.94	2	High	High	High	High	High	High	High	High	High	High	High	High	1298.6	1194.7	1203.3	1288.6	1248.3	1260	993.6	1259.5	1222.2	1283	1215.6	1275.6	1	908.3
High	Master Protein	Q9UVL1	Non-histone chromosomal protein 6 OS=Candida albicans (strain SC5314 / ATCC MYA-2876) OX=237561 GN=NHP6 PE=3 SV=1	11	58	0.993806	0.218448	0.469779	0.955	0.879	0.909	-0.07	-0.19	-0.14	13997	12885.7	13316.5	14655.8	2.66	9.73	2.79	6.17	11	High	High	High	High	High	High	High	High	High	High	High	High	13597.1	14339.3	13997	13916.1	12885.7	11445.8	13339.3	13316.5	12694.3	14655.8	14697.6	13163.3	1	9510.6
High	Master Protein	A0A1D8PRR7	Acetyl-CoA carboxylase OS=Candida albicans (strain SC5314 / ATCC MYA-2876) OX=237561 GN=ACC1 PE=4 SV=1	149	864	0.998424	0.998458	0.470044	0.999	1.001	1.022	0	0	0.03	155305	155541	158791	155423	0.79	1.11	3.47	0.61	147	High	High	High	High	High	High	High	High	High	High	High	High	154285	156721	155305	152707	155786	155541	153281	158791	164317	153978	155423	155757	1	107916
High	Master Protein	A0A1D8PGB7	Epsin OS=Candida albicans (strain SC5314 / ATCC MYA-2876) OX=237561 GN=orf19.1444 PE=1 SV=1	13	34	0.112251	0.987786	0.470091	1.046	1	0.965	0.06	0	-0.05	6431.5	6147.9	5937.9	6150.6	0.28	1.56	3.43	0.82	13	High	High	High	High	High	High	High	High	High	High	High	High	6431.5	6446.7	6411.2	6145	6313.5	6147.9	5881.6	6264.3	5937.9	6133.2	6150.6	6228.5	1	4498.6
High	Master Protein	Q5A216	Probable kinetochore protein NDC80 OS=Candida albicans (strain SC5314 / ATCC MYA-2876) OX=237561 GN=NDC80 PE=3 SV=2	1	2	0.925599	0.120009	0.470428	1.093	1.246	1.143	0.13	0.32	0.19	106.2	121	111.1	97.2	6.49	21.99	14.09	9.67	1	High	High	High	High	High	High	High	High	High	High	High	High	103.1	106.2	116.5	121	118.7	172.1	111.1	110.9	140.5	97.2	94.7	112.8	1	72.1
High	Master Protein	Q5APD4	Sphingolipid C9-methyltransferase OS=Candida albicans (strain SC5314 / ATCC MYA-2876) OX=237561 GN=MTS1 PE=1 SV=1	30	124	0.366433	0.748033	0.470864	1.036	1.009	1.04	0.05	0.01	0.06	22063.1	21501.2	22147.6	21303.3	1.08	3.07	2.42	1.09	30	High	High	High	High	High	High	High	High	High	High	High	High	21804.1	22063.1	22278.1	21501.2	21300.7	22544.7	22390	21370.5	22147.6	21303.3	21669.3	21236.9	1	15251
High	Master Protein	Q5A339	E2 SUMO-conjugating protein OS=Candida albicans (strain SC5314 / ATCC MYA-2876) OX=237561 GN=UBC9 PE=3 SV=1	5	17	0.420714	0.446164	0.471824	1.045	0.946	0.93	0.06	-0.08	-0.1	6297	5698.1	5604.1	6024.6	2.51	4.42	4.25	3.15	5	High	High	High	High	High	High	High	High	High	High	High	High	6068	6368.6	6297	5918.6	5698.1	5417.8	5496.6	5958.9	5604.1	5736.1	6087.5	6024.6	1	4244.3
High	Master Protein	P0CT51	Blood-induced peptide 1 OS=Candida albicans (strain SC5314 / ATCC MYA-2876) OX=237561 GN=BLP1 PE=1 SV=1	2	6	0.613989	0.3756	0.471899	0.941	1.104	0.914	-0.09	0.14	-0.13	1567.4	1839	1522.4	1665.8	6.49	7.79	10.94	6.64	2	High	High	High	High	High	High	High	High	High	High	High	High	1599.5	1414	1567.4	1734.7	1839	2021.6	1331.2	1658.8	1522.4	1665.8	1548.5	1768.9	1	1118.8
High	Master Protein	Q5A199	Translation machinery-associated protein 20 OS=Candida albicans (strain SC5314 / ATCC MYA-2876) OX=237561 GN=orf19.2920 PE=3 SV=1	7	30	0.978019	0.802556	0.472539	1.014	1.006	1.033	0.02	0.01	0.05	4966.6	4924.6	5058	4897.3	1.18	5.5	2.31	1.87	7	High	High	High	High	High	High	High	High	High	High	High	High	4983.3	4875.1	4966.6	4790.8	4924.6	5320.8	5058	4986.9	5216.6	4897.3	4798.1	4981.3	1	3485.6
High	Master Protein	Q5ALV8	Protein phosphatase PP2A regulatory subunit B OS=Candida albicans (strain SC5314 / ATCC MYA-2876) OX=237561 GN=CDC55 PE=3 SV=1	7	15	0.844239	0.999962	0.472656	1.011	1.009	1.047	0.02	0.01	0.07	2713.2	2707.6	2809	2682.5	2.59	4.18	3.88	1.66	7	High	High	High	High	High	High	High	High	High	High	High	High	2713.2	2806.2	2667.6	2707.6	2765.9	2549.9	2871.9	2809	2661.6	2620.7	2706.4	2682.5	1	1897.8
High	Master Protein	Q5AMM1	Transcription initiation factor IIA subunit 2 OS=Candida albicans (strain SC5314 / ATCC MYA-2876) OX=237561 GN=TOA2 PE=3 SV=1	7	18	0.995059	0.986485	0.474481	1.009	0.966	0.975	0.01	-0.05	-0.04	2183.2	2089.7	2109.3	2162.9	1.51	2.95	13.03	1.99	7	High	High	High	High	High	High	High	High	High	High	High	High	2231.9	2183.2	2168.8	2197.1	2087.2	2089.7	1699	2181.4	2109.3	2123.4	2209.6	2162.9	1	1561.1
High	Master Protein	A0A1D8PRL3	NAD(P)-bd_dom domain-containing protein OS=Candida albicans (strain SC5314 / ATCC MYA-2876) OX=237561 GN=CAALFM_CR00090CA PE=4 SV=1	4	6	0.103692	0.0085118	0.474527	1.046	1.103	1.022	0.06	0.14	0.03	1530.9	1614.9	1496.1	1463.9	3.38	1.4	3.82	0.95	4	High	High	High	High	High	High	High	High	High	High	High	High	1510.8	1609.9	1530.9	1614.9	1589.5	1634.7	1496.1	1575.4	1463	1463.9	1447	1474.7	1	1056.8
High	Master Protein	A0A1D8PE03	Uncharacterized protein OS=Candida albicans (strain SC5314 / ATCC MYA-2876) OX=237561 GN=orf19.4450.1 PE=4 SV=1	1	2	0.748862	0.453839	0.474974	0.928	1.109	1.14	-0.11	0.15	0.19	698.9	835.5	858.7	753.3	7.97	7.33	14.82	1.2	1	High	High	High	High	High	High	High	High	High	High	High	High	747.4	637	698.9	786.1	908.9	835.5	714.4	963.9	858.7	738	753.6	753.3	1	522.8
High	Master Protein	Q5ACZ2	Mannan endo-1,6-alpha-mannosidase DFG5 OS=Candida albicans (strain SC5314 / ATCC MYA-2876) OX=237561 GN=DFG5 PE=1 SV=1	6	16	0.781661	0.772673	0.475073	0.952	0.952	0.931	-0.07	-0.07	-0.1	1206.4	1206.3	1179.8	1267.2	1.66	5.19	3.65	6.03	6	High	High	High	High	High	High	High	High	High	High	High	High	1187.4	1227.4	1206.4	1145.1	1206.3	1270.5	1179.8	1227.6	1141.5	1168.8	1317	1267.2	1	830.5
High	Master Protein	A0A1D8PM03	Calnexin OS=Candida albicans (strain SC5314 / ATCC MYA-2876) OX=237561 GN=orf19.5300 PE=3 SV=1	3	5	0.92057	0.979381	0.47591	0.969	0.998	0.951	-0.05	0	-0.07	931.9	960.2	915.2	962	2.54	4.81	10.38	1.17	3	High	High	High	High	High	High	High	High	High	High	High	High	931.9	960.1	912.9	895.8	983.8	960.2	798.3	982.6	915.2	975.9	953.5	962	1	651.8
High	Master Protein	A0A1D8PH80	DNA-directed RNA polymerase II subunit OS=Candida albicans (strain SC5314 / ATCC MYA-2876) OX=237561 GN=RPB4 PE=3 SV=1	5	16	0.996936	0.200707	0.479074	1.005	1.061	1.058	0.01	0.09	0.08	1237.8	1306.6	1303.6	1231.6	3.21	8.96	2.92	0.88	5	High	High	High	High	High	High	High	High	High	High	High	High	1283.8	1204.3	1237.8	1255.7	1306.6	1485.8	1273.2	1303.6	1349.1	1220.9	1242.5	1231.6	1	898
High	Master Protein	Q5A942	Peptide-methionine (R)-S-oxide reductase OS=Candida albicans (strain SC5314 / ATCC MYA-2876) OX=237561 GN=orf19.3292 PE=3 SV=1	2	4	0.230083	0.942195	0.480815	1.158	0.932	0.811	0.21	-0.1	-0.3	111.7	89.9	78.3	96.5	5.97	7.95	18.6	5.71	2	High	High	High	High	High	High	High	High	High	High	High	High	110.9	123.2	111.7	89.9	99.6	85.4	74.1	103.4	78.3	96.5	101.4	90.4	1	77.6
High	Master Protein	Q5AF81	Monothiol glutaredoxin OS=Candida albicans (strain SC5314 / ATCC MYA-2876) OX=237561 GN=GRX3 PE=4 SV=1	9	24	0.990426	0.355638	0.48104	0.99	1.047	1.059	-0.01	0.07	0.08	5476.4	5791	5855.6	5531.5	0.05	2.32	5.79	1.46	9	High	High	High	High	High	High	High	High	High	High	High	High	5472.7	5476.4	5478.5	5645	5791	5912.8	5375.1	5855.6	6013.8	5531.5	5432.9	5592.8	1	3827.9
High	Master Protein	A0A1D8PJ74	Arf family guanine nucleotide exchange factor OS=Candida albicans (strain SC5314 / ATCC MYA-2876) OX=237561 GN=GEA2 PE=4 SV=1	11	15	0.485153	0.694566	0.481043	1.062	0.946	0.967	0.09	-0.08	-0.05	1587.4	1413.5	1445.7	1494.4	2.2	3.84	8.64	3.16	11	High	High	High	High	High	High	High	High	High	High	High	High	1576.9	1642.5	1587.4	1396.8	1413.5	1499.5	1281.7	1521	1445.7	1463.7	1557	1494.4	1	1103
High	Master Protein	Q9HEW1	cAMP-dependent protein kinase regulatory subunit OS=Candida albicans (strain SC5314 / ATCC MYA-2876) OX=237561 GN=BCY1 PE=3 SV=1	23	82	0.930101	0.0870057	0.481268	1.032	1.068	1.074	0.05	0.09	0.1	11326.2	11722.1	11785.4	10977.1	0.67	5.98	3.42	2.64	23	High	High	High	High	High	High	High	High	High	High	High	High	11422.7	11272.7	11326.2	11702.9	11722.1	12968.4	11785.4	11207.8	11971.2	10967	10977.1	11481.9	1	7989.7
High	Master Protein	A0A1D8PMD4	Tubulin gamma chain OS=Candida albicans (strain SC5314 / ATCC MYA-2876) OX=237561 GN=TUB4 PE=3 SV=1	1	2	0.990704	0.500091	0.481319	1.005	1.036	1.037	0.01	0.05	0.05	402.5	415.1	415.6	400.6	3.35	4.92	3.57	2.43	1	High	High	High	High	High	High	High	High	High	High	High	High	385.2	402.5	411.5	434.2	393.5	415.1	415.6	399.3	428.8	402.7	385.1	400.6	1	269.4
High	Master Protein	A0A1D8PS14	Ifu5p OS=Candida albicans (strain SC5314 / ATCC MYA-2876) OX=237561 GN=IFU5 PE=4 SV=1	6	18	0.994548	0.33843	0.482044	0.999	1.059	1.047	0	0.08	0.07	2313.3	2453.7	2424.4	2316.2	0.55	0.85	4.96	3.85	6	High	High	High	High	High	High	High	High	High	High	High	High	2332.6	2308.7	2313.3	2420.6	2458.9	2453.7	2308	2548.5	2424.4	2316.2	2254.4	2431.3	1	1631.6
High	Master Protein	A0A1D8PM86	Mitochondrial 54S ribosomal protein IMG2 OS=Candida albicans (strain SC5314 / ATCC MYA-2876) OX=237561 GN=IMG2 PE=3 SV=1	10	29	0.961921	0.27662	0.482423	0.981	0.957	0.965	-0.03	-0.06	-0.05	8386.6	8186.5	8248.5	8550.5	0.9	5.68	5.63	2.36	10	High	High	High	High	High	High	High	High	High	High	High	High	8386.6	8313.1	8463.4	8282.8	8186.5	7454.8	7594.7	8472.3	8248.5	8317.8	8719.4	8550.5	1	5866
High	Master Protein	A0A1D8PS48	DNA replication licensing factor MCM6 OS=Candida albicans (strain SC5314 / ATCC MYA-2876) OX=237561 GN=MCM6 PE=3 SV=1	19	39	0.834685	0.867357	0.483292	1.018	1.007	1.02	0.03	0.01	0.03	4777.6	4728.3	4787.7	4695.1	2.22	1.62	2.22	1.52	18	High	High	High	High	High	High	High	High	High	High	High	High	4616.4	4813.7	4777.6	4654.3	4728.3	4807.7	4787.7	4677.4	4889.6	4594.1	4695.1	4730.9	1	3229
High	Master Protein	A0A1D8PMS1	DNA-directed RNA polymerase subunit OS=Candida albicans (strain SC5314 / ATCC MYA-2876) OX=237561 GN=orf19.3103 PE=3 SV=1	25	57	0.428001	0.797422	0.484407	1.054	1.037	0.988	0.08	0.05	-0.02	7190.6	7072.9	6738.7	6821.3	3.41	2.71	1.46	2.77	25	High	High	High	High	High	High	High	High	High	High	High	High	7190.6	7389.8	6904.7	6853.5	7072.9	7234.4	6578	6738.7	6753.7	6785.4	6821.3	7134.1	1	5029.5
High	Master Protein	Q5AG77	Amino-acid permease GAP1 OS=Candida albicans (strain SC5314 / ATCC MYA-2876) OX=237561 GN=GAP1 PE=2 SV=1	3	7	0.99967	0.771163	0.485652	1.026	0.962	0.958	0.04	-0.06	-0.06	906	849.1	846	882.8	3.03	2.9	8.56	2.83	3	High	High	High	High	High	High	High	High	High	High	High	High	868.7	921.6	906	849.1	889.4	843.7	916	846	771.4	882.8	878.6	924.4	1	607.6
High	Master Protein	A0A1D8PEX2	Djp1p OS=Candida albicans (strain SC5314 / ATCC MYA-2876) OX=237561 GN=DJP1 PE=4 SV=1	6	16	0.783631	0.977274	0.486447	1.036	0.916	0.939	0.05	-0.13	-0.09	2330	2058.9	2111.5	2248.4	1.26	5.17	15.16	6.21	6	High	High	High	High	High	High	High	High	High	High	High	High	2330	2295.8	2353.9	2037.3	2058.9	2236.1	1620.5	2111.5	2157.5	2018.3	2248.4	2255.5	1	1629.7
High	Master Protein	A0A1D8PCD8	Trans-2-enoyl-CoA reductase (NADPH) OS=Candida albicans (strain SC5314 / ATCC MYA-2876) OX=237561 GN=orf19.3293 PE=3 SV=1	5	11	0.752321	0.990027	0.486626	0.914	1.004	1.067	-0.13	0.01	0.09	3362.8	3697	3928.1	3681.2	3.14	9.73	10.71	6.54	5	High	High	High	High	High	High	High	High	High	High	High	High	3454.7	3244.5	3362.8	3750.1	3697	3131.3	4423.2	3928.1	3575.4	3681.2	3766.8	3324.3	1	2416.4
High	Master Protein	Q5AA46	Putative mitochondrial 37S ribosomal protein MRPS12 OS=Candida albicans (strain SC5314 / ATCC MYA-2876) OX=237561 GN=orf19.2438 PE=3 SV=1	6	17	0.997403	0.927742	0.48757	0.991	0.984	1.033	-0.01	-0.02	0.05	3274.3	3251.3	3415	3304.5	1.47	5.7	2.72	3.08	6	High	High	High	High	High	High	High	High	High	High	High	High	3323.7	3227.4	3274.3	3251.3	3355.5	3000.5	3490.1	3415	3306.3	3326.3	3142.4	3304.5	1	2324.8
High	Master Protein	A0A1D8PR93	Histone H1 OS=Candida albicans (strain SC5314 / ATCC MYA-2876) OX=237561 GN=HHO1 PE=3 SV=1	14	64	0.100468	0.999143	0.487634	0.876	0.994	1.08	-0.19	-0.01	0.11	20237.2	22960.5	24969.2	23110.6	6.71	6	4.86	6	14	High	High	High	High	High	High	High	High	High	High	High	High	22049.2	19344.5	20237.2	22497.7	25141.8	22960.5	26386.5	24969.2	23958	24908	22142.7	23110.6	1	15422.4
High	Master Protein	Q5ABS1	Cytochrome b-c1 complex subunit 7 OS=Candida albicans (strain SC5314 / ATCC MYA-2876) OX=237561 GN=QCR7 PE=1 SV=1	11	92	0.873248	0.475158	0.487736	0.975	1.057	1.086	-0.04	0.08	0.12	10486.3	11372.3	11684.7	10756.1	1.62	5.7	8.81	0.91	11	High	High	High	High	High	High	High	High	High	High	High	High	10553.9	10232.9	10486.3	10951.8	11372.3	12238.9	10441.5	11684.7	12453.9	10756.1	10684.8	10877.7	1	7382
High	Master Protein	A0A1D8PP14	Ribosomal 60S subunit protein L43A OS=Candida albicans (strain SC5314 / ATCC MYA-2876) OX=237561 GN=RPL43A PE=3 SV=1	11	88	0.785028	0.125351	0.487749	1.038	0.856	0.889	0.05	-0.22	-0.17	35068	28945.9	30029.6	33798	5.98	8.73	6.78	3.83	11	High	High	High	High	High	High	High	High	High	High	High	High	32737.6	36900.6	35068	31537.2	28945.9	26475.9	32975.3	30029.6	28965.9	33798	33989.7	31702.2	1	22898.5
High	Master Protein	A0A1D8PHP4	Component of oligomeric Golgi complex 8 OS=Candida albicans (strain SC5314 / ATCC MYA-2876) OX=237561 GN=orf19.36 PE=3 SV=1	1	1	0.759847	0.604371	0.488311	1.169	1.136	1.211	0.23	0.18	0.28	156.5	152.1	162	133.8	4.91	26.23	14.26	9.89	1	High	High	High	High	High	High	High	High	High	High	High	High	169.2	154.8	156.5	152.1	136.2	219.9	162	153	199.1	133.8	133.7	158.1	1	118.3
High	Master Protein	A0A1D8PT80	Rab family GTPase OS=Candida albicans (strain SC5314 / ATCC MYA-2876) OX=237561 GN=CAALFM_CR06520CA PE=4 SV=1	4	16	0.999842	0.646627	0.489193	0.986	0.912	0.874	-0.02	-0.13	-0.19	2673.3	2473.2	2369.8	2711.5	1.03	8.01	10.81	3.86	3	High	High	High	High	High	High	High	High	High	High	High	High	2647.4	2702.8	2673.3	2704.1	2473.2	2305.9	2756.8	2369.8	2248.1	2711.5	2735.6	2546.6	1	1851.8
High	Master Protein	Q5ADX4	Putative serine hydrolase OS=Candida albicans (strain SC5314 / ATCC MYA-2876) OX=237561 GN=orf19.6717 PE=4 SV=1	11	37	0.884248	0.828137	0.489223	1.037	1.031	1.064	0.05	0.04	0.09	4689.5	4663.1	4810.1	4522.4	1.33	6.49	1.88	5.03	11	High	High	High	High	High	High	High	High	High	High	High	High	4689.5	4796.8	4686.4	4496.5	4663.1	5094.4	4810.1	4784.2	4953.3	4437.1	4522.4	4874.2	1	3280.1
High	Master Protein	A0A1D8PTZ3	Uncharacterized protein OS=Candida albicans (strain SC5314 / ATCC MYA-2876) OX=237561 GN=CAALFM_CR09460CA PE=4 SV=1	1	6	0.911827	0.48521	0.489706	0.945	1.035	0.927	-0.08	0.05	-0.11	240.8	263.6	236.2	254.7	3.04	14.7	11.4	2.57	1	High	High	High	High	High	High	High	High	High	High	High	High	250	240.8	235.4	263.6	262.2	336	199	236.2	249.1	254.7	247.8	260.9	1	174.8
High	Master Protein	A0A1D8PD11	Uncharacterized protein OS=Candida albicans (strain SC5314 / ATCC MYA-2876) OX=237561 GN=orf19.3053 PE=4 SV=1	16	74	0.84562	0.334193	0.489781	1.02	1.077	1.02	0.03	0.11	0.03	10891.4	11496.9	10890.1	10673.8	1.7	4.25	7.31	1.31	16	High	High	High	High	High	High	High	High	High	High	High	High	10891.4	10769.7	11135.6	11496.9	10787.5	11704.9	12141.7	10599.6	10890.1	10673.8	10463.7	10727.5	1	7618.1
High	Master Protein	A0A1D8PJD7	GTPase-activating protein OS=Candida albicans (strain SC5314 / ATCC MYA-2876) OX=237561 GN=RNA1 PE=4 SV=1	21	113	0.847017	0.999325	0.490044	0.999	1.005	1.017	0	0.01	0.02	17313.1	17409.7	17632.8	17329.9	1.78	1.17	1.7	1.27	21	High	High	High	High	High	High	High	High	High	High	High	High	17313.1	16848.9	17425.5	17409.7	17502.8	17112.8	17417.6	18011.3	17632.8	17167.9	17604.8	17329.9	1	12109.8
High	Master Protein	A0A1D8PCR4	Dip5p OS=Candida albicans (strain SC5314 / ATCC MYA-2876) OX=237561 GN=DIP5 PE=4 SV=1	5	11	0.563828	0.942944	0.490856	1.067	0.984	0.975	0.09	-0.02	-0.04	2268.4	2092.3	2072.6	2125.8	2.04	3.12	4.52	6.64	5	High	High	High	High	High	High	High	High	High	High	High	High	2268.4	2330.8	2240	2207	2091.2	2092.3	1963	2072.6	2148.4	2062.3	2338	2125.8	1	1586.7
High	Master Protein	Q5AH09	SCF E2 ubiquitin-protein ligase catalytic subunit OS=Candida albicans (strain SC5314 / ATCC MYA-2876) OX=237561 GN=CDC34 PE=3 SV=1	6	18	0.931839	0.67933	0.491064	0.978	0.987	0.981	-0.03	-0.02	-0.03	3977.7	4014.6	3988.7	4066.3	1.36	4.51	4.36	2.82	6	High	High	High	High	High	High	High	High	High	High	High	High	4052.8	3947.6	3977.7	4014.6	4054.5	3729.2	3995	3988.7	3697.8	4066.3	3946.1	4174.8	1	2834.8
High	Master Protein	Q5A653	Protein-lysine N-methyltransferase EFM5 OS=Candida albicans (strain SC5314 / ATCC MYA-2876) OX=237561 GN=EFM5 PE=3 SV=1	8	27	0.566368	0.9226	0.492406	0.975	0.989	0.979	-0.04	-0.02	-0.03	4267.4	4331.9	4286.7	4378.3	2.08	2	2.57	2.25	8	High	High	High	High	High	High	High	High	High	High	High	High	4338.6	4162.5	4267.4	4218.2	4331.9	4387.3	4286.7	4328.4	4122.2	4378.3	4450.7	4256.7	1	3034.7
High	Master Protein	A0A1D8PNI6	Casein kinase II subunit beta OS=Candida albicans (strain SC5314 / ATCC MYA-2876) OX=237561 GN=CKB2 PE=3 SV=1	7	16	0.767727	0.206653	0.493237	0.981	0.948	0.985	-0.03	-0.08	-0.02	4171.2	4031.6	4189	4251.8	3.45	3.82	2.83	4.42	7	High	High	High	High	High	High	High	High	High	High	High	High	4384.5	4171.2	4106.6	3939.8	4242.9	4031.6	4256.7	4189	4027.6	4567.2	4219.5	4251.8	1	3066.8
High	Master Protein	A0A1D8PPH3	Uncharacterized protein OS=Candida albicans (strain SC5314 / ATCC MYA-2876) OX=237561 GN=AIP5 PE=1 SV=1	27	86	0.747751	0.26036	0.493293	1.032	1.077	0.981	0.05	0.11	-0.03	13310.5	13893.4	12657.6	12897.4	1.5	2.48	2.58	4.09	27	High	High	High	High	High	High	High	High	High	High	High	High	13650.6	13310.5	13293.6	13340.1	13893.4	13959.1	12360.6	13013.5	12657.6	12897.4	12725.2	13728.7	1	9548
High	Master Protein	A0A1D8PT47	Uncharacterized protein OS=Candida albicans (strain SC5314 / ATCC MYA-2876) OX=237561 GN=CAALFM_CR05730CA PE=4 SV=1	1	1	0.931218	0.662476	0.493819	1.017	1.111	1.174	0.02	0.15	0.23	153.5	167.8	177.2	151	9.75	7.35	5.51	11.45	1	High	High	High	High	High	High	High	High	High	High	High	High	153.5	153.1	180.7	157.2	167.8	181.9	161.6	178.8	177.2	151	141.1	175.7	1	107.4
High	Master Protein	Q5A9Z6	ATP-dependent RNA helicase FAL1 OS=Candida albicans (strain SC5314 / ATCC MYA-2876) OX=237561 GN=FAL1 PE=3 SV=1	8	18	0.655445	0.947797	0.493834	1.028	1.013	0.992	0.04	0.02	-0.01	1813	1786.1	1749.6	1763	1.43	3.66	3.46	2.44	7	High	High	High	High	High	High	High	High	High	High	High	High	1856.3	1809.5	1813	1680.1	1795.9	1786.1	1749.6	1749.7	1646.8	1763	1740.8	1824.4	1	1298.4
High	Master Protein	Q59W48	Microtubule-binding protein OS=Candida albicans (strain SC5314 / ATCC MYA-2876) OX=237561 GN=orf19.676 PE=3 SV=1	2	3	0.234412	0.781999	0.495702	1.123	1.032	0.918	0.17	0.05	-0.12	149.6	137.5	122.4	133.3	5.49	13.39	8.18	2.08	2	High	High	High	High	High	High	High	High	High	High	High	High	149.6	163	147.5	126.6	137.5	163.8	129.6	110.1	122.4	130.1	135.7	133.3	1	104.6
High	Master Protein	A0A1D8PCG9	Mrs7p OS=Candida albicans (strain SC5314 / ATCC MYA-2876) OX=237561 GN=MRS7 PE=4 SV=1	17	53	0.416278	0.96429	0.495955	1.03	0.973	0.98	0.04	-0.04	-0.03	10735.5	10144.6	10212.5	10424.2	1.84	3.16	4.2	2.83	17	High	High	High	High	High	High	High	High	High	High	High	High	10735.5	11077.9	10729.9	10144.6	10655.4	10052	10212.5	10322.1	9544.5	10104.1	10424.2	10692.4	1	7509
High	Master Protein	A0A1D8PD83	Septin OS=Candida albicans (strain SC5314 / ATCC MYA-2876) OX=237561 GN=CDC3 PE=3 SV=1	25	97	0.999896	0.475448	0.496829	0.999	1.032	1.031	0	0.04	0.04	20416.3	21079.5	21069.7	20434.6	2.44	2.54	3.1	0.25	24	High	High	High	High	High	High	High	High	High	High	High	High	20875	19879.4	20416.3	21079.5	21517.5	20455	21618.6	21069.7	20320.4	20352.3	20434.6	20447.6	1	14601.2
High	Master Protein	A0A1D8PNQ2	Ubiquinone-binding protein OS=Candida albicans (strain SC5314 / ATCC MYA-2876) OX=237561 GN=orf19.6662 PE=3 SV=1	4	6	0.999717	0.913547	0.499134	0.999	1.013	0.931	0	0.02	-0.1	433.3	439.7	404.1	433.9	2.37	2.67	6.72	0.7	4	High	High	High	High	High	High	High	High	High	High	High	High	433.3	444.8	424.2	431	439.7	454.3	393	404.1	445.8	435.2	429.4	433.9	1	303.1
High	Master Protein	A0A1D8PCI9	Protein kinase OS=Candida albicans (strain SC5314 / ATCC MYA-2876) OX=237561 GN=ABC1 PE=3 SV=1	12	27	0.989226	0.980049	0.500435	1.011	0.994	0.978	0.02	-0.01	-0.03	3786.7	3722.1	3663.4	3746	2.8	2.49	7.05	5.4	12	High	High	High	High	High	High	High	High	High	High	High	High	3876	3786.7	3665	3730.9	3722.1	3568.1	3237.1	3663.4	3671.1	3746	3524.7	3927.4	1	2711.1
High	Master Protein	Q59MA3	DNA replication complex GINS protein PSF2 OS=Candida albicans (strain SC5314 / ATCC MYA-2876) OX=237561 GN=PSF2 PE=3 SV=2	1	2	0.560353	0.602559	0.500995	1.09	0.947	0.938	0.12	-0.08	-0.09	118.6	103.1	102	108.8	3.9	1.72	1.74	11.07	1	High	High	High	High	High	High	High	High	High	High	High	High	119.8	118.6	111.4	100.6	104	103.1	99.6	103.1	102	97.8	108.8	122	1	83.8
High	Master Protein	Q59KC4	Mitochondrial glycine transporter OS=Candida albicans (strain SC5314 / ATCC MYA-2876) OX=237561 GN=CAALFM_CR04920WA PE=3 SV=1	2	4	0.524954	0.701981	0.501031	0.817	0.883	0.884	-0.29	-0.18	-0.18	162	175	175.3	198.2	11.85	4.36	10.61	8.47	1	High	High	High	High	High	High	High	High	High	High	High	High	196.8	160.6	162	175	185.1	170	175.3	189.2	152.9	198.2	173.9	204.8	1	137.7
High	Master Protein	Q59WE9	AB hydrolase-1 domain-containing protein OS=Candida albicans (strain SC5314 / ATCC MYA-2876) OX=237561 GN=orf19.2352 PE=4 SV=1	10	21	0.992659	0.631564	0.501568	1.006	0.98	0.967	0.01	-0.03	-0.05	2374.5	2311.8	2280.8	2359.3	1.48	1.81	1.75	2.11	10	High	High	High	High	High	High	High	High	High	High	High	High	2374.5	2383.1	2318.6	2264	2311.8	2347.1	2345.7	2280.8	2272.2	2359.3	2295.9	2393.5	1	1660.8
High	Master Protein	Q59ZV5	Eukaryotic translation initiation factor 3 subunit G OS=Candida albicans (strain SC5314 / ATCC MYA-2876) OX=237561 GN=TIF35 PE=3 SV=1	10	95	0.866828	0.319736	0.501662	1.023	0.957	0.969	0.03	-0.06	-0.05	13578.9	12701.9	12856.3	13272.7	4.4	2.03	3.89	1.12	10	High	High	High	High	High	High	High	High	High	High	High	High	12888.2	14072.7	13578.9	12701.9	12827.1	12333.3	13190.6	12856.3	12214.8	13272.7	13367.9	13076.6	1	9014.7
High	Master Protein	Q5AI00	Rab family GTPase OS=Candida albicans (strain SC5314 / ATCC MYA-2876) OX=237561 GN=YPT1 PE=4 SV=1	15	89	0.755782	0.955673	0.502459	0.981	1.016	1.034	-0.03	0.02	0.05	19133.9	19831.1	20185.2	19514.4	1.1	2.46	4.2	2.16	12	High	High	High	High	High	High	High	High	High	High	High	High	19432.5	19023.1	19133.9	19831.1	20344.5	19369.7	21173.8	20185.2	19478.5	20096	19270.4	19514.4	1	13592.2
High	Master Protein	Q5AHY8	Mitochondrial 54S ribosomal protein YmL27 OS=Candida albicans (strain SC5314 / ATCC MYA-2876) OX=237561 GN=MRPL27 PE=3 SV=1	12	58	0.596901	0.991903	0.502583	0.961	0.989	1.053	-0.06	-0.02	0.07	10493	10796.1	11497.3	10921.7	2.76	4.8	2.92	2.36	12	High	High	High	High	High	High	High	High	High	High	High	High	10783.6	10203.7	10493	10796.1	11308.4	10271.6	11497.3	11507.4	10931.1	11094	10589	10921.7	1	7542.6
High	Master Protein	Q9B8D6	NADH-ubiquinone oxidoreductase chain 1 OS=Candida albicans (strain SC5314 / ATCC MYA-2876) OX=237561 GN=NAD1 PE=3 SV=2	2	3	0.849632	0.824836	0.50311	0.983	0.97	1.035	-0.02	-0.04	0.05	404.1	398.8	425.5	411.1	1.04	3.54	2.08	3.83	2	High	High	High	High	High	High	High	High	High	High	High	High	406.3	404.1	398.2	418.3	398.8	390.5	425.5	433.1	415.5	394.7	411.1	426.2	1	284.2
High	Master Protein	P34948	Mannose-6-phosphate isomerase OS=Candida albicans (strain SC5314 / ATCC MYA-2876) OX=237561 GN=PMI1 PE=1 SV=2	22	106	0.819432	0.0380242	0.50335	1.012	1.037	1.021	0.02	0.05	0.03	18637.2	19105.9	18815.8	18423.4	0.89	0.13	0.68	2	22	High	High	High	High	High	High	High	High	High	High	High	High	18854.1	18637.2	18526.9	19102.2	19147.4	19105.9	18631.6	18876.9	18815.8	18423.4	18213	18933.3	1	13187.6
High	Master Protein	Q59XW9	Increased recombination centers protein 22-2 OS=Candida albicans (strain SC5314 / ATCC MYA-2876) OX=237561 GN=IRC22-2 PE=3 SV=2	5	23	0.999998	0.395066	0.503688	1.016	1.054	1.071	0.02	0.08	0.1	2192.1	2275.4	2311.8	2158.4	0.94	13.76	9.2	2.81	1	High	High	High	High	High	High	High	High	High	High	High	High	2212.7	2171.3	2192.1	2275.4	2258.8	2853.7	2311.8	2270.4	2674.8	2158.4	2151.2	2261.1	1	1547.7
High	Master Protein	A0A1D8PNG2	Uncharacterized protein (Fragment) OS=Candida albicans (strain SC5314 / ATCC MYA-2876) OX=237561 GN=orf19.4263 PE=4 SV=1	2	3	0.995987	0.380621	0.503845	0.996	1.068	1.101	-0.01	0.09	0.14	323.8	347.3	358	325.2	4.17	22.05	16.26	4.51	2	High	High	High	High	High	High	High	High	High	High	High	High	323.8	338.7	311.6	330.9	347.3	486.7	324.6	358	442.9	300.5	325.2	325.2	1	226.5
High	Master Protein	A0A1D8PD15	Proteasome regulatory particle lid subunit OS=Candida albicans (strain SC5314 / ATCC MYA-2876) OX=237561 GN=RPN3 PE=3 SV=1	24	76	0.934709	0.996783	0.504097	0.981	0.999	0.976	-0.03	0	-0.04	12416.6	12648.6	12354	12663.3	0.97	1.96	1.58	1.43	24	High	High	High	High	High	High	High	High	High	High	High	High	12416.6	12402.6	12618.1	12258.1	12711.8	12648.6	12534.4	12354	12145.7	12663.3	12364	12684.3	1	8684.8
High	Master Protein	A0A1D8PU72	Aha1p OS=Candida albicans (strain SC5314 / ATCC MYA-2876) OX=237561 GN=AHA1 PE=3 SV=1	13	29	0.908796	0.693994	0.504383	0.982	1.017	1.013	-0.03	0.02	0.02	6034.3	6247.1	6224.3	6144.9	2.52	1.4	3.07	0.67	13	High	High	High	High	High	High	High	High	High	High	High	High	6215.2	5912.3	6034.3	6152	6325.9	6247.1	6122.1	6495	6224.3	6144.9	6075	6147.6	1	4347.3
High	Master Protein	Q59WI7	rRNA-processing protein CGR1 OS=Candida albicans (strain SC5314 / ATCC MYA-2876) OX=237561 GN=CGR1 PE=3 SV=1	4	10	0.979549	0.603064	0.504535	1.015	0.972	0.978	0.02	-0.04	-0.03	2375.3	2273.7	2288.3	2339.1	1.19	5.98	6.05	2.6	4	High	High	High	High	High	High	High	High	High	High	High	High	2375.3	2411.2	2355.5	2356.3	2273.7	2094.3	2071.9	2319.4	2288.3	2291.1	2339.1	2412.1	1	1661.4
High	Master Protein	A0A1D8PJW1	V-SNARE protein OS=Candida albicans (strain SC5314 / ATCC MYA-2876) OX=237561 GN=VTI1 PE=3 SV=1	10	26	0.0687051	0.998225	0.504741	1.075	1.008	0.96	0.11	0.01	-0.06	3907.1	3662.6	3486.6	3632.8	6.82	2.49	0.33	2.29	10	High	High	High	High	High	High	High	High	High	High	High	High	4305	3907.1	3782.7	3521.7	3662.6	3689.5	3470.3	3492.5	3486.6	3565.2	3632.8	3731.2	1	3011.1
High	Master Protein	A0A1D8PNA7	GPN-loop GTPase 2 OS=Candida albicans (strain SC5314 / ATCC MYA-2876) OX=237561 GN=orf19.3169 PE=3 SV=1	3	4	0.974485	0.110848	0.505328	0.962	0.878	0.937	-0.06	-0.19	-0.09	755.1	689.9	735.4	785.3	5.72	9.67	4.45	2.46	3	High	High	High	High	High	High	High	High	High	High	High	High	754	831.8	755.1	771.8	637.5	689.9	710.6	775.8	735.4	785.3	818.5	783.9	1	527.4
High	Master Protein	Q5ALW4	Phosphatidate phosphatase OS=Candida albicans (strain SC5314 / ATCC MYA-2876) OX=237561 GN=SMP2 PE=3 SV=1	6	23	0.795851	0.78666	0.505885	1.017	1.002	0.976	0.02	0	-0.03	2857.5	2815.4	2742.6	2809	0.41	4.3	2.51	1.86	6	High	High	High	High	High	High	High	High	High	High	High	High	2857.5	2866	2842.7	2762.6	2815.4	2996.8	2635.4	2742.6	2761.4	2743.2	2809	2846.1	1	1998.7
High	Master Protein	A0A1D8PEZ9	DAO domain-containing protein OS=Candida albicans (strain SC5314 / ATCC MYA-2876) OX=237561 GN=orf19.2333 PE=4 SV=1	4	6	0.485903	0.999206	0.506603	1.065	1.011	0.953	0.09	0.02	-0.07	1920.4	1824.3	1719	1804	1.86	1.27	4.68	4.65	4	High	High	High	High	High	High	High	High	High	High	High	High	1863.4	1920.4	1928	1793.6	1838.7	1824.3	1847.1	1719	1694.1	1804	1755.3	1920.7	1	1303.3
High	Master Protein	A0A1D8PNS3	Mtr10p OS=Candida albicans (strain SC5314 / ATCC MYA-2876) OX=237561 GN=MTR10 PE=4 SV=1	14	24	0.762146	0.664721	0.507299	1.04	1.017	1.049	0.06	0.02	0.07	4260.7	4164.1	4296.4	4095.9	0.81	4.29	3.18	3.07	14	High	High	High	High	High	High	High	High	High	High	High	High	4274.2	4209.1	4260.7	4164.1	4163.5	4481.1	4437.3	4164	4296.4	4049.9	4095.9	4289.8	1	2989.6
High	Master Protein	A0A1D8PU35	Uncharacterized protein OS=Candida albicans (strain SC5314 / ATCC MYA-2876) OX=237561 GN=CAALFM_CR09840CA PE=4 SV=1	1	1	0.486957	0.368731	0.50863	1.133	1.097	1.116	0.18	0.13	0.16	124.5	120.5	122.6	109.8	4.03	16.39	14.12	10.05	1	High	High	High	High	High	High	High	High	High	High	High	High	124.6	124.5	116	120.5	108.2	148.4	122.6	104.4	138.8	93.3	109.8	113	1	87.1
High	Master Protein	A0A1D8PQ12	Uncharacterized protein OS=Candida albicans (strain SC5314 / ATCC MYA-2876) OX=237561 GN=orf19.5572 PE=4 SV=1	2	3	0.787624	0.993266	0.509158	1.065	0.978	0.973	0.09	-0.03	-0.04	338.6	310.9	309.1	317.8	3.71	7.92	6	3.67	2	High	High	High	High	High	High	High	High	High	High	High	High	341.7	318.9	338.6	293.6	310.9	342.8	309.1	278.1	309.3	317.8	308	331.3	1	239
High	Master Protein	Q9HGT6	Serine--tRNA ligase, cytoplasmic OS=Candida albicans (strain SC5314 / ATCC MYA-2876) OX=237561 GN=SES1 PE=1 SV=1	48	280	0.989784	0.967669	0.510274	1.006	1.004	1.019	0.01	0.01	0.03	54864.5	54724.7	55565.9	54527.5	0.57	0.97	0.58	2.38	47	High	High	High	High	High	High	High	High	High	High	High	High	54864.5	54479.6	55101.2	55504	54489.9	54724.7	55157.1	55565.9	55797.3	53405.6	55997.9	54527.5	1	38375.3
High	Master Protein	A0A1D8PT03	Flavodoxin-like fold family protein OS=Candida albicans (strain SC5314 / ATCC MYA-2876) OX=237561 GN=YCP4 PE=3 SV=1	8	48	0.765273	0.944876	0.510399	1.018	1.002	0.979	0.03	0	-0.03	11230.1	11059	10799.1	11033.5	1.45	1.76	4.08	2.78	8	High	High	High	High	High	High	High	High	High	High	High	High	11087.6	11230.1	11412.5	10989.5	11059	11359.3	11003.6	10799.1	10169.4	11291.4	11033.5	10682.8	1	7755.3
High	Master Protein	A0A1D8PMZ3	Arginine N-methyltransferase 2 OS=Candida albicans (strain SC5314 / ATCC MYA-2876) OX=237561 GN=RMT2 PE=3 SV=1	5	14	0.92159	0.56746	0.510882	0.995	0.973	0.981	-0.01	-0.04	-0.03	1561.9	1527.3	1539.6	1569.7	4.79	3.06	4.18	1.35	4	High	High	High	High	High	High	High	High	High	High	High	High	1561.9	1687.7	1549	1544.1	1527.3	1457.1	1539.6	1543.6	1432.7	1548.1	1569.7	1590.5	1	1092.5
High	Master Protein	A0A1D8PFM1	DNA mismatch repair protein OS=Candida albicans (strain SC5314 / ATCC MYA-2876) OX=237561 GN=MSH6 PE=3 SV=1	2	4	0.949635	0.883475	0.511318	1.031	0.984	0.985	0.04	-0.02	-0.02	1126.1	1074.6	1075.8	1091.9	2.35	6.87	8.28	1.63	2	High	High	High	High	High	High	High	High	High	High	High	High	1153.3	1126.1	1100.4	986.9	1074.6	1132	932.3	1075.8	1084.2	1091.9	1086.2	1119.7	1	806.7
High	Master Protein	A0A1D8PQI1	Putative zinc metalloprotease OS=Candida albicans (strain SC5314 / ATCC MYA-2876) OX=237561 GN=VPS70 PE=3 SV=1	2	4	0.939429	0.875999	0.512029	1.001	1.063	1.082	0	0.09	0.11	594.5	631.2	642.7	593.9	4.39	14.24	19.46	7.5	2	High	High	High	High	High	High	High	High	High	High	High	High	599.9	553.1	594.5	631.2	598.1	777.1	637.6	642.7	883.1	587.6	593.9	670.8	1	419.6
High	Master Protein	A0A1D8PJE0	Metalloaminopeptidase OS=Candida albicans (strain SC5314 / ATCC MYA-2876) OX=237561 GN=LAP41 PE=3 SV=1	19	54	0.394928	0.995657	0.514225	1.045	0.976	0.962	0.06	-0.03	-0.06	9423.6	8806.2	8680	9018.7	2.35	4.93	0.95	0.47	19	High	High	High	High	High	High	High	High	High	High	High	High	9112.4	9423.6	9536.7	8806.2	8803.8	9579.1	8680	8673.4	8819.5	9018.7	8964.1	9047.8	1	6373.7
High	Master Protein	A0A1D8PFV6	FAA_hydrolase domain-containing protein OS=Candida albicans (strain SC5314 / ATCC MYA-2876) OX=237561 GN=orf19.7244 PE=3 SV=1	15	24	0.842139	0.906938	0.515406	1.022	1.012	0.979	0.03	0.02	-0.03	7009.4	6938.6	6710.3	6857	0.84	4.58	1.06	1.86	14	High	High	High	High	High	High	High	High	High	High	High	High	6960.8	7077.7	7009.4	7024.6	6938.6	6446.6	6747.5	6710.3	6610.4	6857	6791.3	7038.4	1	4868.7
High	Master Protein	A0A1D8PJN1	Cleavage and polyadenylation specificity factor subunit 2 OS=Candida albicans (strain SC5314 / ATCC MYA-2876) OX=237561 GN=orf19.325 PE=3 SV=1	5	9	0.992019	0.687014	0.515586	0.996	1.046	1.101	-0.01	0.06	0.14	1471.3	1545	1626.8	1477	2.75	16.95	14.49	4.86	5	High	High	High	High	High	High	High	High	High	High	High	High	1524.9	1471.3	1444.9	1514.2	1545	2026.6	1626.8	1563.2	2028	1475.3	1477	1603.9	1	1066.6
High	Master Protein	Q5A8L5	CCR4-NOT core DEDD family RNase subunit OS=Candida albicans (strain SC5314 / ATCC MYA-2876) OX=237561 GN=POP2 PE=4 SV=1	3	5	0.112595	0.408089	0.516024	1.075	1.031	1.03	0.1	0.04	0.04	728	698.2	697.8	677.5	3.85	4.41	3.29	1.88	3	High	High	High	High	High	High	High	High	High	High	High	High	757.2	728	701.1	684.4	698.2	744.1	697.8	685.2	730.2	662.9	688.3	677.5	1	529.6
High	Master Protein	A0A1D8PHX1	Lysophospholipid acyltransferase OS=Candida albicans (strain SC5314 / ATCC MYA-2876) OX=237561 GN=LPT1 PE=4 SV=1	2	4	0.607868	0.828922	0.516326	1.047	0.969	0.956	0.07	-0.05	-0.07	735.2	680.6	671.5	702.5	3.16	3.28	1.86	6.75	2	High	High	High	High	High	High	High	High	High	High	High	High	711.8	758.3	735.2	680.6	707.9	663.3	682.3	657.5	671.5	702.5	658.6	753.7	1	497.8
High	Master Protein	A0A1D8PRG0	54S ribosomal protein L2, mitochondrial OS=Candida albicans (strain SC5314 / ATCC MYA-2876) OX=237561 GN=MRP7 PE=3 SV=1	28	110	0.951919	0.583643	0.517206	1.009	0.994	1.029	0.01	-0.01	0.04	17460.4	17202.5	17801.6	17297.9	0.96	4.18	1.81	0.8	28	High	High	High	High	High	High	High	High	High	High	High	High	17460.4	17530.5	17214	17202.5	17213.5	15992.1	17981.3	17801.6	17358.9	17067	17313.6	17297.9	1	12212.8
High	Master Protein	A0A1D8PUA2	Casein kinase 2 catalytic subunit OS=Candida albicans (strain SC5314 / ATCC MYA-2876) OX=237561 GN=CKA1 PE=1 SV=1	11	22	0.556883	0.910525	0.517259	1.052	1.028	1.05	0.07	0.04	0.07	2621.8	2562.2	2617.4	2493	2.06	2.51	1.77	3.6	11	High	High	High	High	High	High	High	High	High	High	High	High	2621.8	2653.8	2549.1	2510.4	2638.6	2562.2	2655.5	2563.5	2617.4	2473.9	2493	2640.6	1	1833.8
High	Master Protein	A0A1D8PQD4	E2 ubiquitin-conjugating enzyme OS=Candida albicans (strain SC5314 / ATCC MYA-2876) OX=237561 GN=orf19.1085 PE=3 SV=1	10	55	0.555981	0.574898	0.518484	0.979	1.01	1.026	-0.03	0.01	0.04	6920.1	7138	7247.9	7067.3	2.84	2.15	2.42	1.67	10	High	High	High	High	High	High	High	High	High	High	High	High	6950.6	6600.4	6920.1	7047.8	7138	7348.3	7247.9	6997.7	7331.5	7067.5	6865.4	7067.3	1	4861.6
High	Master Protein	Q5A927	N,N-dimethylaniline monooxygenase OS=Candida albicans (strain SC5314 / ATCC MYA-2876) OX=237561 GN=orf19.3307 PE=4 SV=1	3	6	0.945284	0.547241	0.518674	1.042	1.052	1.143	0.06	0.07	0.19	237.4	239.6	260.2	227.7	5.86	7.46	12.12	1.86	3	High	High	High	High	High	High	High	High	High	High	High	High	237.4	249.3	221.7	239.6	237.4	270.7	260.2	216.9	275.6	232	223.6	227.7	1	166
High	Master Protein	Q5A213	Rrp9p OS=Candida albicans (strain SC5314 / ATCC MYA-2876) OX=237561 GN=RRP9 PE=4 SV=1	11	30	0.406353	0.474071	0.519432	1.013	0.952	0.953	0.02	-0.07	-0.07	4031.8	3787	3790.9	3978.2	2.72	2.87	2.71	1.86	10	High	High	High	High	High	High	High	High	High	High	High	High	4031.8	4213.1	4010.6	3787	3947.7	3737.7	3753.1	3948.8	3790.9	3978.2	3862.3	3998.2	1	2820.1
High	Master Protein	A0A1D8PF42	Uncharacterized protein OS=Candida albicans (strain SC5314 / ATCC MYA-2876) OX=237561 GN=orf19.2296 PE=4 SV=1	76	205	0.130414	0.857229	0.519585	1.071	0.984	0.963	0.1	-0.02	-0.05	34305.3	31533.8	30866.3	32039.4	1.5	3.36	3.83	3.01	76	High	High	High	High	High	High	High	High	High	High	High	High	33633.7	34638.4	34305.3	32533.3	31533.8	30420.7	30866.3	32257.4	29892.1	32039.4	31194.1	33123.2	1	23525.3
High	Master Protein	Q59X38	Pescadillo homolog OS=Candida albicans (strain SC5314 / ATCC MYA-2876) OX=237561 GN=NOP7 PE=1 SV=2	29	88	0.996951	0.173585	0.519948	0.99	0.965	0.989	-0.01	-0.05	-0.02	16204.8	15786	16176.1	16360.8	1.28	1.89	2.9	2.68	29	High	High	High	High	High	High	High	High	High	High	High	High	16204.8	16549.6	16171.8	15904	15786	15341.5	15410.2	16243	16176.1	15940.1	16817.4	16360.8	1	11334.5
High	Master Protein	A0A1D8PJ29	Chitin synthase OS=Candida albicans (strain SC5314 / ATCC MYA-2876) OX=237561 GN=CHS8 PE=4 SV=1	1	3	0.993806	0.973069	0.520025	0.984	0.985	0.976	-0.02	-0.02	-0.04	312.3	312.6	309.6	317.3	1.99	7.37	5.21	0.93	1	High	High	High	High	High	High	High	High	High	High	High	High	309	312.3	321.1	312.6	289.6	335.7	282.6	309.8	309.6	314.1	317.3	320	1	216.1
High	Master Protein	A0A1D8PQ60	CRAL-TRIO domain-containing protein OS=Candida albicans (strain SC5314 / ATCC MYA-2876) OX=237561 GN=orf19.5711 PE=4 SV=1	7	19	0.500875	0.996892	0.521424	1.071	1.025	0.98	0.1	0.04	-0.03	1328.9	1272.3	1216.3	1240.9	1.09	0.57	4.03	5.94	7	High	High	High	High	High	High	High	High	High	High	High	High	1328.9	1353.9	1328.3	1272.3	1281.1	1266.7	1283.9	1216.3	1187.5	1240.9	1235.9	1370.3	1	929.5
High	Master Protein	P79023	Phospho-2-dehydro-3-deoxyheptonate aldolase, tyrosine-inhibited OS=Candida albicans (strain SC5314 / ATCC MYA-2876) OX=237561 GN=ARO4 PE=3 SV=1	25	176	0.935257	0.995038	0.522452	1.004	0.994	1.006	0.01	-0.01	0.01	47690.7	47233.6	47801.2	47495.5	1.37	0.38	1.27	1.74	22	High	High	High	High	High	High	High	High	High	High	High	High	46862.1	48149.7	47690.7	47233.6	47285.7	46950.4	47497.5	47801.2	48673.5	47495.5	47971.9	46368.3	1	32778
High	Master Protein	Q5AP65	Protein FMP52, mitochondrial OS=Candida albicans (strain SC5314 / ATCC MYA-2876) OX=237561 GN=FMP52 PE=3 SV=1	12	31	0.828131	0.978095	0.522966	1.024	0.994	0.969	0.03	-0.01	-0.05	2625.1	2547.8	2482.9	2563.1	2.77	2.33	5.36	0.65	12	High	High	High	High	High	High	High	High	High	High	High	High	2547	2625.1	2692	2547.8	2587.5	2471.4	2594	2482.9	2330.3	2563.1	2544.4	2577.8	1	1781.5
High	Master Protein	Q5A6K8	Flap endonuclease 1 OS=Candida albicans (strain SC5314 / ATCC MYA-2876) OX=237561 GN=RAD27 PE=3 SV=1	5	9	0.999533	0.960008	0.523561	1.003	1.032	1.026	0	0.04	0.04	992.4	1020.3	1014.3	989.1	2.55	2.63	4.68	1.54	5	High	High	High	High	High	High	High	High	High	High	High	High	992.4	1029.2	980.2	1030.1	1020.3	980	1089.5	1014.3	999.1	989.1	988.8	1015.6	1	694.1
High	Master Protein	Q59N44	Nfu_N domain-containing protein OS=Candida albicans (strain SC5314 / ATCC MYA-2876) OX=237561 GN=CAALFM_CR07670WA PE=3 SV=1	5	9	0.187339	0.576761	0.523674	0.908	0.935	0.937	-0.14	-0.1	-0.09	2440.9	2512.2	2519.1	2687.4	1.13	7.23	7.05	3.29	5	High	High	High	High	High	High	High	High	High	High	High	High	2481	2440.9	2428	2512.2	2758.4	2396.9	2379.7	2735.9	2519.1	2687.4	2797.7	2621.9	1	1735.4
High	Master Protein	G1UB37	Major facilitator superfamily multidrug transporter FLU1 OS=Candida albicans (strain SC5314 / ATCC MYA-2876) OX=237561 GN=FLU1 PE=2 SV=1	5	9	0.985659	0.991125	0.524236	0.958	1.015	1.089	-0.06	0.02	0.12	2078.4	2201.5	2361.1	2168.6	3.54	9.93	8.85	3.35	5	High	High	High	High	High	High	High	High	High	High	High	High	2180.2	2078.4	2035.6	2259.8	2201.5	1871.1	2522.4	2361.1	2112.5	2168.6	2193.5	2058.7	1	1524.9
High	Master Protein	A0A1D8PSU5	Putative peptidylprolyl isomerase OS=Candida albicans (strain SC5314 / ATCC MYA-2876) OX=237561 GN=CAALFM_CR04710WA PE=4 SV=1	1	4	0.525525	0.998977	0.525147	1.094	1.019	0.919	0.13	0.03	-0.12	416.2	387.7	349.6	380.4	4.35	3.37	11.4	3.18	1	High	High	High	High	High	High	High	High	High	High	High	High	416.2	431.4	395.4	387.7	390.4	366.9	322.3	402.6	349.6	380.4	374.7	398.1	1	291.1
High	Master Protein	A0A1D8PD97	ATP synthase F1 subunit epsilon OS=Candida albicans (strain SC5314 / ATCC MYA-2876) OX=237561 GN=orf19.5201.1 PE=3 SV=1	15	81	0.975341	0.999148	0.525298	0.912	1.007	0.98	-0.13	0.01	-0.03	27166	30015.1	29190	29793.7	6.03	5.49	33.35	1.98	15	High	High	High	High	High	High	High	High	High	High	High	High	29689.4	26518.6	27166	32066.3	28772.4	30015.1	15207.5	29770.4	29190	30130.2	29793.7	28987	1	20766.5
High	Master Protein	A0A1D8PHY1	Meiotic recombination directing protein OS=Candida albicans (strain SC5314 / ATCC MYA-2876) OX=237561 GN=MSC7 PE=3 SV=1	8	22	0.814304	0.308861	0.525459	1.091	1.078	1.109	0.13	0.11	0.15	3473.9	3433.5	3531.7	3184.6	1.18	15.31	8.31	4.75	8	High	High	High	High	High	High	High	High	High	High	High	High	3491.4	3413.4	3473.9	3433.5	3391.1	4404.3	3531.7	3344.3	3930.1	3138.9	3184.6	3426.2	1	2442.1
High	Master Protein	A0A1D8PJB1	Mitochondrial 37S ribosomal protein MRP1 OS=Candida albicans (strain SC5314 / ATCC MYA-2876) OX=237561 GN=orf19.1662 PE=4 SV=1	14	39	0.970212	0.528013	0.525466	0.986	1.052	1.03	-0.02	0.07	0.04	6230	6644.5	6505.2	6316.8	1.85	7.45	3.55	1.14	14	High	High	High	High	High	High	High	High	High	High	High	High	6091.3	6319.1	6230	6140.4	6644.5	7129.3	6505.2	6482.9	6900.7	6316.8	6232.7	6376.1	1	4260.6
Medium	Master Protein	Q59P87	Mediator of RNA polymerase II transcription subunit 31 OS=Candida albicans (strain SC5314 / ATCC MYA-2876) OX=237561 GN=SOH1 PE=3 SV=1	1	2	0.820463	0.998597	0.526847	1.104	0.915	0.94	0.14	-0.13	-0.09	353.8	293.1	301.2	320.4	7.58	11.13	27.43	8.4	1	High	High	High	High	High	High	High	High	High	High	High	High	330.4	384.2	353.8	348.9	293.1	286	182.2	301.2	314.8	287	320.4	339.4	1	231.1
High	Master Protein	Q5A7N6	Bud21p OS=Candida albicans (strain SC5314 / ATCC MYA-2876) OX=237561 GN=BUD21 PE=4 SV=1	5	10	0.913586	0.225619	0.527214	1.027	0.93	0.946	0.04	-0.1	-0.08	2307.4	2090	2126.5	2247.2	3.2	9.63	6.55	2.38	5	High	High	High	High	High	High	High	High	High	High	High	High	2307.4	2420.1	2279	2195	2090	1815.8	2230.9	2126.5	1957.5	2247.2	2212.5	2318	1	1613.9
High	Master Protein	Q5ANA8	Metacaspase-1 OS=Candida albicans (strain SC5314 / ATCC MYA-2876) OX=237561 GN=MCA1 PE=3 SV=1	6	13	0.993277	0.361506	0.52766	1.008	1.074	1.064	0.01	0.1	0.09	1730.9	1844	1827	1717.7	3.92	10.9	4.07	4.17	6	High	High	High	High	High	High	High	High	High	High	High	High	1768.4	1730.9	1637.9	1739.8	1844	2140.6	1822.2	1827	1956.3	1717.7	1674.4	1815.9	1	1236.9
Medium	Master Protein	A0A1D8PRK4	Ufe1p OS=Candida albicans (strain SC5314 / ATCC MYA-2876) OX=237561 GN=UFE1 PE=4 SV=1	1	1	0.140373	0.871424	0.528016	0.902	0.947	0.963	-0.15	-0.08	-0.05	232.5	244.3	248.4	257.8	6.47	7.2	4.96	3.22	1	High	High	High	High	High	High	High	High	High	High	High	High	249.4	232.5	219.3	244.3	273.9	240.7	255.6	248.4	231.9	271.2	255.7	257.8	1	174.5
High	Master Protein	Q5AKZ4	Mcu1p OS=Candida albicans (strain SC5314 / ATCC MYA-2876) OX=237561 GN=MCU1 PE=4 SV=1	4	13	0.872137	0.574418	0.528059	1.039	0.935	0.972	0.06	-0.1	-0.04	2514.8	2263.4	2351.2	2420	7.9	1.17	9.89	3.2	4	High	High	High	High	High	High	High	High	High	High	High	High	2356.7	2755.3	2514.8	2294.6	2263.4	2241.6	2009.2	2430.5	2351.2	2520.8	2367.3	2420	1	1648.4
High	Master Protein	A0A1D8PQE0	Dol-P-Man:Man(5)GlcNAc(2)-PP-Dol alpha-1,3-mannosyltransferase OS=Candida albicans (strain SC5314 / ATCC MYA-2876) OX=237561 GN=orf19.1092 PE=4 SV=1	1	1	0.889875	0.646714	0.528386	1.17	1.142	1.159	0.23	0.19	0.21	133.4	130.2	132.2	114	13.67	2.53	8.59	10.45	1	High	High	High	High	High	High	High	High	High	High	High	High	140.4	133.4	107.4	130.2	135	128.6	123.2	146.1	132.2	114	111	134	1	98.2
High	Master Protein	A0A1D8PMP9	Methionine aminopeptidase OS=Candida albicans (strain SC5314 / ATCC MYA-2876) OX=237561 GN=orf19.3124 PE=3 SV=1	13	48	0.356209	0.344485	0.529136	1.04	0.959	0.977	0.06	-0.06	-0.03	9681.8	8928.9	9097.8	9313.8	2.76	3.21	1.31	1.73	13	High	High	High	High	High	High	High	High	High	High	High	High	9377.4	9908.6	9681.8	8928.9	9337.8	8779	9187.9	8952.9	9097.8	9313.8	9178.8	9499.6	1	6559.1
High	Master Protein	A0A1D8PIC6	PlsC domain-containing protein OS=Candida albicans (strain SC5314 / ATCC MYA-2876) OX=237561 GN=orf19.4066 PE=3 SV=1	4	5	0.985129	0.54316	0.529996	0.992	1.03	1.121	-0.01	0.04	0.16	685.6	711.7	774.8	691.2	6.18	14.41	4.81	3.2	4	High	High	High	High	High	High	High	High	High	High	High	High	761.3	685.6	684.7	692.2	711.7	892.3	720.8	774.8	790.8	673.2	691.2	717.3	1	532.5
High	Master Protein	Q5A5B2	PDCD2_C domain-containing protein OS=Candida albicans (strain SC5314 / ATCC MYA-2876) OX=237561 GN=orf19.5168 PE=4 SV=1	12	30	0.854637	0.995311	0.530039	0.99	1.003	1.032	-0.01	0	0.05	5596.7	5670.2	5833.4	5653.2	0.92	2.2	3.57	1.58	12	High	High	High	High	High	High	High	High	High	High	High	High	5628.3	5596.7	5527.4	5580.8	5827.9	5670.2	5607	6021.7	5833.4	5653.2	5587	5763.9	1	3936.8
High	Master Protein	Q59QN4	Very-long-chain (3R)-3-hydroxyacyl-CoA dehydratase OS=Candida albicans (strain SC5314 / ATCC MYA-2876) OX=237561 GN=CAALFM_CR05140WA PE=3 SV=1	1	3	0.838241	0.979076	0.531671	0.93	0.949	0.904	-0.1	-0.07	-0.15	237.3	242.3	230.7	255.2	2.8	2.54	3.68	6.81	1	High	High	High	High	High	High	High	High	High	High	High	High	237.3	234.3	247.1	242.3	237.8	250	230.7	244.8	229.1	258.3	227.8	255.2	1	166
High	Master Protein	A0A1D8PRM9	Uncharacterized protein OS=Candida albicans (strain SC5314 / ATCC MYA-2876) OX=237561 GN=CAALFM_CR00280CA PE=4 SV=1	2	2	0.884083	0.999955	0.532779	1.075	1.009	0.94	0.1	0.01	-0.09	118	110.7	103.2	109.7	9.8	6.95	12.49	11.45	2	High	High	High	High	High	High	High	High	High	High	High	High	118	114.2	136.7	110.7	110.3	124.3	116	103.2	90.2	109.7	106.8	131.1	1	82.5
High	Master Protein	A0A1D8PND0	Putative AAA family ATPase OS=Candida albicans (strain SC5314 / ATCC MYA-2876) OX=237561 GN=RIX7 PE=4 SV=1	3	6	0.967477	0.666055	0.532882	0.999	1.033	1.047	0	0.05	0.07	586.1	605.6	614	586.6	5.68	0.42	3.28	2.62	3	High	High	High	High	High	High	High	High	High	High	High	High	632.2	566.5	586.1	604.5	605.6	609.4	629.2	589.5	614	571.5	586.6	602.3	1	442.2
High	Master Protein	A0A1D8PKW1	Uncharacterized protein OS=Candida albicans (strain SC5314 / ATCC MYA-2876) OX=237561 GN=orf19.6177 PE=4 SV=1	3	4	0.99984	0.667529	0.533198	0.969	1.066	1.047	-0.05	0.09	0.07	1464.9	1611.5	1583.2	1511.7	4.51	3	10.66	3.05	3	High	High	High	High	High	High	High	High	High	High	High	High	1566.8	1440	1464.9	1529.9	1611.5	1612.8	1452.8	1792.8	1583.2	1511.7	1444.1	1530.9	1	1095.9
High	Master Protein	Q5AEM8	Presequence translocated-associated motor subunit PAM17, mitochondrial OS=Candida albicans (strain SC5314 / ATCC MYA-2876) OX=237561 GN=PAM17 PE=3 SV=3	5	18	0.967327	0.309687	0.534245	1.007	0.967	0.96	0.01	-0.05	-0.06	4307.1	4135.5	4104.1	4275.4	2.28	6.55	5.6	2.65	5	High	High	High	High	High	High	High	High	High	High	High	High	4293.8	4472.3	4307.1	4146.1	4135.5	3688.6	4265.9	4104.1	3816.8	4275.4	4399.9	4173.4	1	3003.3
High	Master Protein	A0A1D8PRW9	Boi2p OS=Candida albicans (strain SC5314 / ATCC MYA-2876) OX=237561 GN=BOI2 PE=4 SV=1	2	3	0.0303206	0.321158	0.535686	0.795	0.86	0.897	-0.33	-0.22	-0.16	235.5	254.7	265.9	296.4	5.96	9.7	6.26	4.01	2	High	High	High	High	High	High	High	High	High	High	High	High	255	227.2	235.5	243.2	292.1	254.7	265.9	287.8	254.6	298.4	277.3	296.4	1	178.4
High	Master Protein	Q59V92	Type II HSP40 co-chaperone OS=Candida albicans (strain SC5314 / ATCC MYA-2876) OX=237561 GN=SIS1 PE=4 SV=1	21	87	0.611972	0.943365	0.535885	1.037	1.025	1.025	0.05	0.04	0.04	18381.9	18168.8	18170.8	17723.3	0.73	0.94	4.33	1.69	21	High	High	High	High	High	High	High	High	High	High	High	High	18443.7	18186.7	18381.9	17892.9	18168.8	18202.4	19283.8	17738.7	18170.8	17720	17723.3	18244.3	1	12900.6
High	Master Protein	A0A1D8PF34	Psp1p OS=Candida albicans (strain SC5314 / ATCC MYA-2876) OX=237561 GN=PSP1 PE=4 SV=1	2	3	0.980409	0.304086	0.536612	1.033	1.054	1.061	0.05	0.08	0.09	852.9	870.5	876.1	825.7	3.11	2.1	3.24	3.26	2	High	High	High	High	High	High	High	High	High	High	High	High	861.2	852.9	812.2	856.8	893.1	870.5	831.1	882.4	876.1	812.7	825.7	865	1	602.3
High	Master Protein	A0A1D8PES9	Uncharacterized protein OS=Candida albicans (strain SC5314 / ATCC MYA-2876) OX=237561 GN=orf19.4893 PE=4 SV=1	2	2	0.11424	0.517041	0.536781	0.833	0.875	0.936	-0.26	-0.19	-0.1	178.6	187.5	200.6	214.3	6.07	18.77	9.36	7.74	1	High	High	High	High	High	High	High	High	High	High	High	High	178.6	160.9	179.6	187.5	163.3	235.4	200.6	173.9	208.8	214.3	208.8	240.9	1	124.9
High	Master Protein	A0A1D8PQ54	Uncharacterized protein OS=Candida albicans (strain SC5314 / ATCC MYA-2876) OX=237561 GN=orf19.5620 PE=4 SV=1	9	25	0.245993	0.108841	0.536785	1.084	1.081	1.046	0.12	0.11	0.06	3951.4	3940.9	3812.4	3645	1.74	7.19	3.04	5	9	High	High	High	High	High	High	High	High	High	High	High	High	3951.4	4026.8	3889.6	3940.9	3834.9	4383.9	3812.4	3770.7	3991.7	3645	3486.4	3851.3	1	2763.8
High	Master Protein	Q59LI2	Mitochondrial import inner membrane translocase subunit TIM17 OS=Candida albicans (strain SC5314 / ATCC MYA-2876) OX=237561 GN=TIM17 PE=3 SV=1	3	13	0.543609	0.284882	0.53701	1.027	0.938	0.961	0.04	-0.09	-0.06	3227.7	2949.6	3019.4	3143	1.85	5.26	2.48	3.1	3	High	High	High	High	High	High	High	High	High	High	High	High	3227.7	3303.6	3185.4	2949.6	3111.2	2800.8	2914.5	3058.3	3019.4	3009.9	3197.7	3143	1	2257.6
High	Master Protein	A0A1D8PU83	4-hydroxybenzoate polyprenyltransferase, mitochondrial OS=Candida albicans (strain SC5314 / ATCC MYA-2876) OX=237561 GN=COQ2 PE=3 SV=1	5	13	0.804428	0.923135	0.537029	1.027	0.977	1.064	0.04	-0.03	0.09	983.6	935.6	1018.7	957.6	2.8	3.63	7.57	2.6	5	High	High	High	High	High	High	High	High	High	High	High	High	1023.8	983.6	970.5	935.6	972.2	904.2	1086.5	1018.7	933.5	935.3	985.1	957.6	1	716.1
High	Master Protein	P28870	FK506-binding protein 1 OS=Candida albicans (strain SC5314 / ATCC MYA-2876) OX=237561 GN=RBP1 PE=1 SV=2	10	75	0.996336	0.988461	0.537211	1.013	1.028	0.96	0.02	0.04	-0.06	13384.5	13584.4	12678	13212.8	1.37	7.64	18.23	2.29	10	High	High	High	High	High	High	High	High	High	High	High	High	13439	13100.5	13384.5	13584.4	12361.9	14404.4	9289	12678	13244.9	13212.8	13270.2	12725.4	1	9400
High	Master Protein	A0A1D8PJG4	RSC chromatin remodeling complex ATPase subunit OS=Candida albicans (strain SC5314 / ATCC MYA-2876) OX=237561 GN=STH1 PE=4 SV=1	35	101	0.9133	0.919951	0.538629	1.005	1.001	0.969	0.01	0	-0.04	13710.3	13663.5	13230.5	13647.2	1.47	3.61	1.07	1.23	33	High	High	High	High	High	High	High	High	High	High	High	High	13710.3	14014.2	13630.8	12936.5	13663.5	13862.8	13470	13230.5	13215	13454.5	13647.2	13789.7	1	9589.7
High	Master Protein	A0A1D8PMU5	Mitochondrial 54S ribosomal protein YmL38/YmL34 OS=Candida albicans (strain SC5314 / ATCC MYA-2876) OX=237561 GN=orf19.5684 PE=3 SV=1	9	39	0.831325	0.468172	0.538689	0.98	0.994	0.943	-0.03	-0.01	-0.08	10249.3	10394.2	9863.7	10460.2	1.13	6.36	4.18	1.95	9	High	High	High	High	High	High	High	High	High	High	High	High	10249.3	10378.9	10146.6	10437	10394.2	9310.2	9863.7	10569.6	9816	10460.2	10782.2	10398.9	1	7168.9
High	Master Protein	A0A1D8PND9	Coatomer subunit delta OS=Candida albicans (strain SC5314 / ATCC MYA-2876) OX=237561 GN=RET2 PE=3 SV=1	15	48	0.632216	0.757702	0.538909	1.028	1.037	1.033	0.04	0.05	0.05	10843.2	10939.2	10894.4	10550.4	1.52	3.6	1.98	0.96	15	High	High	High	High	High	High	High	High	High	High	High	High	10843.2	10672.4	11001.5	11096	10939.2	10357.6	10894.4	11076.9	10648.7	10527.8	10714.6	10550.4	1	7584.3
Medium	None	A0A1D8PNM8	Zcf13p OS=Candida albicans (strain SC5314 / ATCC MYA-2876) OX=237561 GN=ZCF13 PE=4 SV=1	1	5	0.322221	0.94191	0.538913	0.896	0.991	1.069	-0.16	-0.01	0.1	1852.4	2050.8	2211	2068.5	6.4	11.18	4.95	6.54	1	High	High	High	High	High	High	High	High	High	High	High	High	1852.4	1662.7	1870	2108.2	2050.8	1704.5	2312	2211	2093.7	2068.5	2120	1870	1	1295.7
High	Master Protein	Q5A6L1	Fumarate hydratase OS=Candida albicans (strain SC5314 / ATCC MYA-2876) OX=237561 GN=FUM11 PE=3 SV=1	30	114	0.711821	0.574526	0.539019	1.013	1.025	1.02	0.02	0.04	0.03	26937.8	27261.2	27109.6	26585.3	1.43	2.15	1.15	1.62	27	High	High	High	High	High	High	High	High	High	High	High	High	26527.2	27295.8	26937.8	26348.1	27261.2	27423.9	26689.2	27109.6	27295.5	26585.3	26086.4	26939.6	1	18554.6
High	Master Protein	Q5A4Y0	tRNA-dihydrouridine synthase OS=Candida albicans (strain SC5314 / ATCC MYA-2876) OX=237561 GN=DUS4 PE=3 SV=1	5	5	0.706599	0.345296	0.54001	1.025	1.015	1.022	0.04	0.02	0.03	764.2	756.3	761.3	745.2	3.84	7.02	4.09	4.24	5	High	High	High	High	High	High	High	High	High	High	High	High	793.5	764.2	734.7	753.6	756.3	850.6	761.3	749.7	809.3	696	745.2	753.3	1	555
High	Master Protein	A0A1D8PLT5	XPGI domain-containing protein OS=Candida albicans (strain SC5314 / ATCC MYA-2876) OX=237561 GN=orf19.2664 PE=3 SV=1	9	15	0.960727	0.655981	0.540213	0.98	0.985	0.978	-0.03	-0.02	-0.03	2750.8	2764.8	2744.4	2806.2	4.25	2.71	3.13	1.86	8	High	High	High	High	High	High	High	High	High	High	High	High	2675.4	2907	2750.8	2643	2776.9	2764.8	2779.5	2618.1	2744.4	2806.2	2760.9	2865	1	1871.3
High	Master Protein	A0A1D8PGR1	18S rRNA aminocarboxypropyltransferase OS=Candida albicans (strain SC5314 / ATCC MYA-2876) OX=237561 GN=TSR3 PE=3 SV=1	2	4	0.999824	0.636666	0.540827	1.036	0.94	0.95	0.05	-0.09	-0.07	485.6	440.7	445.2	468.9	5.06	6.63	4.96	4.32	2	High	High	High	High	High	High	High	High	High	High	High	High	444.3	485.8	485.6	420.3	478.6	440.7	463.6	445.2	419.8	450.6	468.9	491.2	1	310.8
High	Master Protein	Q5AJF7	Ribosomal 60S subunit protein L12A OS=Candida albicans (strain SC5314 / ATCC MYA-2876) OX=237561 GN=RPL12 PE=3 SV=1	16	175	0.996076	0.241728	0.541316	0.996	0.955	0.949	-0.01	-0.07	-0.08	32925.8	31584.2	31388.7	33063.7	1.73	4.57	3.88	2.25	16	High	High	High	High	High	High	High	High	High	High	High	High	32279.7	33410.4	32925.8	31851.2	31584.2	29280	32743.4	31388.7	30307.3	33145.6	33063.7	31831	1	22578.2
High	Master Protein	A0A1D8PK98	Putative serine/threonine protein kinase OS=Candida albicans (strain SC5314 / ATCC MYA-2876) OX=237561 GN=orf19.6980 PE=4 SV=1	2	3	0.888353	0.148818	0.541372	1.068	1.198	1.167	0.09	0.26	0.22	233.4	262	255.1	218.6	5.4	14.41	7.72	6.07	2	High	High	High	High	High	High	High	High	High	High	High	High	251.8	227.1	233.4	237.2	262	313.7	228.3	265.7	255.1	218.6	216.2	241	1	176.1
High	Master Protein	Q59UY8	DNA repair protein RAD51 homolog OS=Candida albicans (strain SC5314 / ATCC MYA-2876) OX=237561 GN=RAD51 PE=3 SV=1	8	23	0.921863	0.965659	0.541756	1.047	0.977	0.994	0.07	-0.03	-0.01	3515.4	3280.6	3336.7	3357	2.62	5	9.98	1.16	8	High	High	High	High	High	High	High	High	High	High	High	High	3536	3515.4	3369.3	3280.6	3144	3472.3	2799.5	3336.7	3355.2	3357	3414.3	3339.6	1	2473.3
High	Master Protein	Q59MA9	Clustered mitochondria protein homolog OS=Candida albicans (strain SC5314 / ATCC MYA-2876) OX=237561 GN=CLU1 PE=3 SV=2	72	253	0.919915	0.697956	0.541826	0.989	0.976	1.048	-0.02	-0.04	0.07	43323.7	42756.3	45904.7	43818.7	1.83	2.07	3.07	1.22	72	High	High	High	High	High	High	High	High	High	High	High	High	43002.8	44521.3	43323.7	42756.3	44287.2	42719.1	43600.9	46096.7	45904.7	43759.6	43818.7	44720	1	30078.6
High	Master Protein	Q5A389	Ribosomal 40S subunit protein S20 OS=Candida albicans (strain SC5314 / ATCC MYA-2876) OX=237561 GN=RPS20 PE=3 SV=1	16	389	0.976259	0.850924	0.542384	0.99	0.994	1.016	-0.01	-0.01	0.02	57216.1	57435.6	58685.8	57766.1	0.51	2.61	1.61	0.88	16	High	High	High	High	High	High	High	High	High	High	High	High	57652.9	57102.9	57216.1	57314.5	57435.6	60001.5	59628.3	57742.8	58685.8	58050.7	57766.1	57070.1	1	40325.7
High	Master Protein	Q5AME2	Pentafunctional AROM polypeptide OS=Candida albicans (strain SC5314 / ATCC MYA-2876) OX=237561 GN=ARO1 PE=1 SV=2	70	215	0.997918	0.119284	0.544791	1.007	1.026	1.026	0.01	0.04	0.04	31462.3	32049	32025.8	31228.4	0.07	1.77	0.41	1.63	70	High	High	High	High	High	High	High	High	High	High	High	High	31440.8	31462.3	31483.2	31969.5	32049	33000.1	32025.8	31798.7	32028.8	31218.9	31228.4	32111.6	1	21991.4
High	Master Protein	Q5A6S2	Proteasome regulatory particle base subunit OS=Candida albicans (strain SC5314 / ATCC MYA-2876) OX=237561 GN=RPT4 PE=3 SV=1	24	75	0.955976	0.979131	0.546265	0.996	0.992	0.975	-0.01	-0.01	-0.04	13092.7	13035.9	12811.7	13143.3	1.59	3.15	1.62	1.64	23	High	High	High	High	High	High	High	High	High	High	High	High	13180.5	13092.7	12785.3	12644.5	13035.9	13467	13039.5	12625.4	12811.7	13342.7	12912.8	13143.3	1	9219.2
High	Master Protein	Q5AEL8	1-acyl-sn-glycerol-3-phosphate acyltransferase OS=Candida albicans (strain SC5314 / ATCC MYA-2876) OX=237561 GN=SLC1 PE=3 SV=1	7	24	0.366026	0.982511	0.546641	1.052	1.035	1.041	0.07	0.05	0.06	2353.4	2314.3	2327.8	2236.4	1.5	5.23	6.04	2.18	7	High	High	High	High	High	High	High	High	High	High	High	High	2348.7	2412.4	2353.4	2314.3	2128.2	2348.2	2493.9	2212.1	2327.8	2183.7	2236.4	2280.8	1	1642.8
High	Master Protein	Q5AAP7	DUF2012 domain-containing protein OS=Candida albicans (strain SC5314 / ATCC MYA-2876) OX=237561 GN=orf19.6264 PE=4 SV=1	3	7	0.886954	0.646597	0.547027	0.909	1.071	1.142	-0.14	0.1	0.19	450.8	531.1	566	495.8	3.71	24.17	4.34	4.57	3	High	High	High	High	High	High	High	High	High	High	High	High	465.8	432.5	450.8	437.1	531.1	702.5	574.8	529.3	566	495.8	458.5	497.7	1	325.8
High	Master Protein	Q5AF98	Zuotin OS=Candida albicans (strain SC5314 / ATCC MYA-2876) OX=237561 GN=ZUO1 PE=4 SV=1	40	347	0.997365	0.147299	0.547622	1.003	0.967	0.962	0	-0.05	-0.06	73557.5	70909.8	70594.7	73352.6	1.3	1.61	3.28	0.63	40	High	High	High	High	High	High	High	High	High	High	High	High	72596.7	74513.6	73557.5	70909.8	71449.7	69265.6	74474.8	70594.7	70227.3	73352.6	73780.6	72857.4	1	50778.2
High	Master Protein	A0A1D8PEX3	DNA-directed RNA polymerase subunit OS=Candida albicans (strain SC5314 / ATCC MYA-2876) OX=237561 GN=RPA190 PE=3 SV=1	81	266	0.929822	0.950188	0.548505	0.988	0.974	1.007	-0.02	-0.04	0.01	48792.2	48096.1	49745.6	49380.2	1.11	2.92	1.67	1.21	80	High	High	High	High	High	High	High	High	High	High	High	High	49026	48792.2	48001	48096.1	50289.2	47627.4	49745.6	51037	49475.8	49380.2	48363.5	49408.5	1	34291.5
High	Master Protein	A0A1D8PN91	Fcr3p OS=Candida albicans (strain SC5314 / ATCC MYA-2876) OX=237561 GN=FCR3 PE=4 SV=1	3	4	0.945128	0.997128	0.54896	1.061	1.017	0.911	0.09	0.02	-0.13	240.6	230.4	206.4	226.7	3.66	9.05	9.16	9.58	2	High	High	High	High	High	High	High	High	High	High	High	High	237.3	254.1	240.6	222.9	230.4	263.6	238.3	206.4	202.1	226.7	219.6	261.8	1	166
High	Master Protein	A0A1D8PJ54	Utp20p OS=Candida albicans (strain SC5314 / ATCC MYA-2876) OX=237561 GN=UTP20 PE=4 SV=1	20	33	1	0.998589	0.549029	1.001	0.99	1.026	0	-0.01	0.04	4481	4431.7	4595.3	4477.2	1.97	2.85	1.83	1.91	19	High	High	High	High	High	High	High	High	High	High	High	High	4438.3	4608.7	4481	4417	4431.7	4646.3	4551.5	4595.3	4715.2	4477.2	4444.8	4607.8	1	3104.4
High	Master Protein	Q59WG0	Adenosine 5'-monophosphoramidase HNT1 OS=Candida albicans (strain SC5314 / ATCC MYA-2876) OX=237561 GN=HNT1 PE=1 SV=1	10	39	0.99977	0.38895	0.549986	0.993	1.027	1.031	-0.01	0.04	0.04	5988.1	6192.2	6217.8	6028.9	2.04	3.29	2.71	3.76	10	High	High	High	High	High	High	High	High	High	High	High	High	6156.1	5917.5	5988.1	6192.2	6103.9	6496.3	6044.3	6217.8	6381.7	6028.9	5775.7	6225.9	1	4305.9
High	Master Protein	A0A1D8PJ36	Thioredoxin domain-containing protein OS=Candida albicans (strain SC5314 / ATCC MYA-2876) OX=237561 GN=orf19.2516 PE=4 SV=1	2	3	0.993816	0.693245	0.552392	1.013	1.115	1.168	0.02	0.16	0.22	331.7	365	382.5	327.5	3.6	19.17	9.84	16.38	2	High	High	High	High	High	High	High	High	High	High	High	High	331.7	317.7	341.3	365	327.1	470.4	363.7	382.5	438.4	295.1	404.3	327.5	1	232
High	Master Protein	Q5APB5	Uncharacterized protein OS=Candida albicans (strain SC5314 / ATCC MYA-2876) OX=237561 GN=orf19.4850 PE=4 SV=1	8	15	0.979098	0.443728	0.553394	1.001	1.059	1.025	0	0.08	0.04	1252.4	1325	1281.5	1250.7	3.95	2.48	5.88	1.15	8	High	High	High	High	High	High	High	High	High	High	High	High	1329.6	1252.4	1235.1	1325	1348.5	1283.9	1399.7	1254.5	1281.5	1246.4	1250.7	1273.3	1	930
High	Master Protein	A0A1D8PQ42	Ayr2p OS=Candida albicans (strain SC5314 / ATCC MYA-2876) OX=237561 GN=AYR2 PE=3 SV=1	3	6	0.999981	0.996178	0.553826	0.983	0.991	1.025	-0.02	-0.01	0.04	364	367	379.5	370.3	2.92	2.74	2.62	2.83	3	High	High	High	High	High	High	High	High	High	High	High	High	364	378.6	357.7	373.2	367	353.7	387	379.5	367.4	354.7	374.4	370.3	1	254.6
High	Master Protein	Q5AHZ3	Transcription factor TFIIB OS=Candida albicans (strain SC5314 / ATCC MYA-2876) OX=237561 GN=SUA71 PE=3 SV=1	2	4	0.902124	0.516632	0.554285	1.016	1.018	1.059	0.02	0.03	0.08	279.3	279.8	291	274.8	3.04	10.43	2.27	0.8	2	High	High	High	High	High	High	High	High	High	High	High	High	277.8	293.5	279.3	273.2	279.8	329.3	299.4	286.3	291	273	277.3	274.8	1	194.3
[truncated: 2,506 more rows]
[truncated: 11 more columns]

## Sheet: Changes (Hrd1-Wt)
Protein FDR Confidence: Combined	Accession	Description	Gene Name	Abundance Ratio: (Hrd) / (WT)	Abundance Ratio P-Value: (Hrd) / (WT)	S. cerevisiae best hit or ortholog (per CGD ortholog finder)	# Peptides	# PSMs	Abundance Ratio P-Value: (Doa) / (WT)	Abundance Ratio P-Value: (Ub) / (WT)	Abundance Ratio: (Doa) / (WT)	Abundance Ratio: (Ub) / (WT)	Abundance Ratio (log2): (Doa) / (WT)	Abundance Ratio (log2): (Hrd) / (WT)	Abundance Ratio (log2): (Ub) / (WT)	Abundances (Grouped): Doa	Abundances (Grouped): Hrd	Abundances (Grouped): Ub	Abundances (Grouped): WT	Abundances (Grouped) CV [%]: Doa	Abundances (Grouped) CV [%]: Hrd	Abundances (Grouped) CV [%]: Ub	Abundances (Grouped) CV [%]: WT	# Unique Peptides	Found in Sample: [S4] F1: 128N, Sample, Doa	Found in Sample: [S5] F1: 128C, Sample, Doa	Found in Sample: [S6] F1: 129N, Sample, Doa	Found in Sample: [S7] F1: 129C, Sample, Hrd	Found in Sample: [S8] F1: 132N, Sample, Hrd	Found in Sample: [S9] F1: 132C, Sample, Hrd	Found in Sample: [S10] F1: 133N, Sample, Ub	Found in Sample: [S11] F1: 133C, Sample, Ub	Found in Sample: [S12] F1: 134N, Sample, Ub	Found in Sample: [S1] F1: 126, Sample, WT	Found in Sample: [S2] F1: 127N, Sample, WT	Found in Sample: [S3] F1: 127C, Sample, WT	Abundances (Normalized): F1: 128N, Sample, Doa	Abundances (Normalized): F1: 128C, Sample, Doa	Abundances (Normalized): F1: 129N, Sample, Doa	Abundances (Normalized): F1: 129C, Sample, Hrd	Abundances (Normalized): F1: 132N, Sample, Hrd	Abundances (Normalized): F1: 132C, Sample, Hrd	Abundances (Normalized): F1: 133N, Sample, Ub	Abundances (Normalized): F1: 133C, Sample, Ub	Abundances (Normalized): F1: 134N, Sample, Ub	Abundances (Normalized): F1: 126, Sample, WT	Abundances (Normalized): F1: 127N, Sample, WT	Abundances (Normalized): F1: 127C, Sample, WT	# Protein Groups
[truncated: 61 more rows]
[truncated: 12 more columns]

[truncated: 2 more sheets: Changes(Doa10-Wt), Changes (Ubc7-Wt)]
